# Supplementary material for: Transcriptome in Combination Proteome Unveils the Phenylpropane Pathway Involved in Garlic (Allium sativum) Greening
Source: Front Nutr. 2021 Nov 1;8:764133. doi: 10.3389/fnut.2021.764133 (PMC8591526; doi:10.3389/fnut.2021.764133)
Supplement: Supplementary Table 2 — The function of unigenes annotated. [file Table_2.XLSX]

## Sheet: Annotation.genes
GeneID	nr.acc|Evalue|des	KEGG.id|logEvalue|KO|KO.def|ko|ko.defLine	GO	entry|name|logEvalue|description	eggNOG.id|logEvalue|Orthologous|FunCat|description	Pfam.acc|hmm.name|description
c44043/f1p3/1144	XP_010681225.1|0x1.b9659ffe41b57p-148|PREDICTED: peroxidase 12 [Beta vulgaris subsp. vulgaris]_x0001_KMT19595.1 hypothetical protein BVRB_1g012110 [Beta vulgaris subsp. vulgaris]	bvg:104896205|-45.2|K00430|E1.11.1.7; peroxidase [EC:1.11.1.7]|ko00940|Phenylpropanoid biosynthesis;;	cellular_component:extracellular region(GO:0005576);;cellular_component:vacuole(GO:0005773);;cellular_component:vacuole(GO:0005773);;molecular_function:oxidoreductase activity(GO:0016491);;biological_process:hydrogen peroxide catabolic process(GO:0042744);;molecular_function:metal ion binding(GO:0046872);;biological_process:oxidation-reduction process(GO:0055114);;molecular_function:peroxidase ac…	Q96520|PER12_ARATH|-39.0|Peroxidase 12 OS=Arabidopsis thaliana GN=PER12 PE=1 SV=1	3847.GLYMA10G36680.1|-43.4|ENOG410ZMT4|G|peroxidase	-
c11693/f1p13/1676	XP_009418616.1|0x1.4fbc3bb1b6a7ep-391|PREDICTED: tricetin 3',4',5'-O-trimethyltransferase-like [Musa acuminata subsp. malaccensis]_x0001_XP_018686583.1 PREDICTED: tricetin 3',4',5'-O-trimethyltransferase-like [Musa acuminata subsp. malaccensis]	mus:103998763|-118.4|K13066|E2.1.1.68, COMT; caffeic acid 3-O-methyltransferase [EC:2.1.1.68]|ko00940|Phenylpropanoid biosynthesis;;	molecular_function:transferase activity(GO:0016740);;biological_process:methylation(GO:0032259);;molecular_function:caffeate O-methyltransferase activity(GO:0047763);;molecular_function:methyltransferase activity(GO:0008168);;biological_process:phenylpropanoid biosynthetic process(GO:0009699);;biological_process:lignin biosynthetic process(GO:0009809)	P46484|COMT1_EUCGU|-116.7|Caffeic acid 3-O-methyltransferase OS=Eucalyptus gunnii GN=OMT PE=2 SV=1	4641.GSMUA_Achr3P27470_001|-117.5|ENOG410XS7T|S|o-methyltransferase	PF00891.17|Methyltransf_2|4.3e-59|O-methyltransferase
c70286/f1p12/1308	AAS48416.1|0x1.999c467ab6cf4p-706|cinammate 4-hydroxylase [Allium cepa]	nnu:104593756|-198.7|K00487|CYP73A; trans-cinnamate 4-monooxygenase [EC:1.14.13.11]|ko00130|Ubiquinone and other terpenoid-quinone biosynthesis;;ko00945|Stilbenoid, diarylheptanoid and gingerol biosynthesis;;ko00940|Phenylpropanoid biosynthesis;;ko00360|Phenylalanine metabolism;;ko00941|Flavonoid biosynthesis;;	molecular_function:metal ion binding(GO:0046872);;biological_process:oxidation-reduction process(GO:0055114);;molecular_function:monooxygenase activity(GO:0004497);;molecular_function:oxidoreductase activity(GO:0016491);;molecular_function:trans-cinnamate 4-monooxygenase activity(GO:0016710)	Q43054|TCMO_POPKI|-196.3|Trans-cinnamate 4-monooxygenase OS=Populus kitakamiensis GN=CYP73A16 PE=2 SV=1	3694.POPTR_0013s15380.1|-195.8|COG2124|Q|Cytochrome p450	PF00067.21|p450|3.4e-89|Cytochrome P450
c24450/f1p15/3426	XP_020270484.1|0x1.d9ff972fec2fdp-678|beta-glucosidase 25 [Asparagus officinalis]	egu:105036001|-199.6|K01188|E3.2.1.21; beta-glucosidase [EC:3.2.1.21]|ko00940|Phenylpropanoid biosynthesis;;ko00460|Cyanoamino acid metabolism;;ko00500|Starch and sucrose metabolism;;	molecular_function:hydrolase activity, acting on glycosyl bonds(GO:0016798);;molecular_function:scopolin beta-glucosidase activity(GO:0102483);;biological_process:metabolic process(GO:0008152);;molecular_function:beta-glucosidase activity(GO:0008422);;molecular_function:hydrolase activity(GO:0016787)	Q0DA21|BGL25_ORYSJ|-191.1|Beta-glucosidase 25 OS=Oryza sativa subsp. japonica GN=BGLU25 PE=2 SV=2	4558.Sb10g027600.1|-194.3|COG2723|G|beta-glucosidase	PF00232.17|Glyco_hydro_1|3.2e-137|Glycosyl hydrolase family 1
c3369/f1p14/2256	ADO24189.1|0x1.35efeee3fd699p-928|phenylalanine ammonia-lyase [Allium sativum]	pda:103718264|-243.5|K10775|PAL; phenylalanine ammonia-lyase [EC:4.3.1.24]|ko00940|Phenylpropanoid biosynthesis;;ko00360|Phenylalanine metabolism;;	biological_process:cinnamic acid biosynthetic process(GO:0009800);;molecular_function:lyase activity(GO:0016829);;molecular_function:phenylalanine ammonia-lyase activity(GO:0045548);;cellular_component:cytoplasm(GO:0005737);;cellular_component:cytoplasm(GO:0005737);;biological_process:phenylpropanoid metabolic process(GO:0009698)	Q42609|PALY_BROFI|-244.1|Phenylalanine ammonia-lyase OS=Bromheadia finlaysoniana GN=PAL PE=2 SV=1	29760.VIT_16s0039g01280.t01|-241.9|COG2986|E|histidine ammonia-lyase	PF00221.18|Lyase_aromatic|6e-127|Aromatic amino acid lyase
c317700/f1p2/1273	XP_008781455.1|0x1.c435a41319dd7p-247|PREDICTED: cationic peroxidase SPC4-like [Phoenix dactylifera]	pda:103701240|-74.9|K00430|E1.11.1.7; peroxidase [EC:1.11.1.7]|ko00940|Phenylpropanoid biosynthesis;;	cellular_component:extracellular region(GO:0005576);;molecular_function:oxidoreductase activity(GO:0016491);;biological_process:hydrogen peroxide catabolic process(GO:0042744);;molecular_function:metal ion binding(GO:0046872);;biological_process:oxidation-reduction process(GO:0055114);;molecular_function:peroxidase activity(GO:0004601);;molecular_function:peroxidase activity(GO:0004601);;cellular…	P84516|PER1_SORBI|-64.0|Cationic peroxidase SPC4 OS=Sorghum bicolor GN=Sb03g046810 PE=1 SV=2	4641.GSMUA_Achr3P02950_001|-69.5|ENOG410ZMT4|G|peroxidase	PF00141.22|peroxidase|3.5e-46|Peroxidase
c26268/f1p14/1850	XP_020270484.1|0x1.ddccf038dc066p-354|beta-glucosidase 25 [Asparagus officinalis]	egu:105036001|-106.0|K01188|E3.2.1.21; beta-glucosidase [EC:3.2.1.21]|ko00940|Phenylpropanoid biosynthesis;;ko00460|Cyanoamino acid metabolism;;ko00500|Starch and sucrose metabolism;;	molecular_function:hydrolase activity, acting on glycosyl bonds(GO:0016798);;molecular_function:scopolin beta-glucosidase activity(GO:0102483);;biological_process:metabolic process(GO:0008152);;molecular_function:beta-glucosidase activity(GO:0008422);;molecular_function:hydrolase activity(GO:0016787)	Q0DA21|BGL25_ORYSJ|-103.9|Beta-glucosidase 25 OS=Oryza sativa subsp. japonica GN=BGLU25 PE=2 SV=2	4641.GSMUA_Achr8P33160_001|-106.4|COG2723|G|beta-glucosidase	PF00232.17|Glyco_hydro_1|1.3e-92|Glycosyl hydrolase family 1
c32513/f1p279/2128	XP_020263929.1|0x1.38df0de81f674p-351|beta-glucosidase 1-like [Asparagus officinalis]_x0001_ONK81454.1 uncharacterized protein A4U43_C01F29260 [Asparagus officinalis]	pda:103709312|-99.6|K05350|bglB; beta-glucosidase [EC:3.2.1.21]|ko00940|Phenylpropanoid biosynthesis;;ko00460|Cyanoamino acid metabolism;;ko00500|Starch and sucrose metabolism;;	biological_process:metabolic process(GO:0008152);;molecular_function:beta-glucosidase activity(GO:0008422);;molecular_function:beta-glucosidase activity(GO:0008422);;molecular_function:hydrolase activity(GO:0016787);;molecular_function:hydrolase activity, acting on glycosyl bonds(GO:0016798);;molecular_function:metal ion binding(GO:0046872);;molecular_function:scopolin beta-glucosidase activity(G…	Q9LV33|BGL44_ARATH|-90.0|Beta-glucosidase 44 OS=Arabidopsis thaliana GN=BGLU44 PE=2 SV=1	4641.GSMUA_Achr3P29530_001|-98.3|COG2723|G|beta-glucosidase	PF00232.17|Glyco_hydro_1|2.8e-55|Glycosyl hydrolase family 1
c11315/f1p23/2741	ONK57379.1|0x1.d153af79ff983p-456|uncharacterized protein A4U43_C10F19480 [Asparagus officinalis]	cit:102620173|-135.2|K10775|PAL; phenylalanine ammonia-lyase [EC:4.3.1.24]|ko00940|Phenylpropanoid biosynthesis;;ko00360|Phenylalanine metabolism;;	biological_process:cinnamic acid biosynthetic process(GO:0009800);;molecular_function:lyase activity(GO:0016829);;molecular_function:phenylalanine ammonia-lyase activity(GO:0045548);;cellular_component:cytoplasm(GO:0005737);;cellular_component:cytoplasm(GO:0005737);;biological_process:phenylpropanoid metabolic process(GO:0009698)	P45727|PALY_PERAE|-135.4|Phenylalanine ammonia-lyase OS=Persea americana GN=PAL PE=2 SV=1	29760.VIT_08s0040g01710.t01|-133.9|COG2986|E|histidine ammonia-lyase	PF00221.18|Lyase_aromatic|1.1e-28|Aromatic amino acid lyase
c88562/f1p10/1325	AAS48416.1|0x1.079edb4d08cdfp-572|cinammate 4-hydroxylase [Allium cepa]	nnu:104593756|-163.3|K00487|CYP73A; trans-cinnamate 4-monooxygenase [EC:1.14.13.11]|ko00130|Ubiquinone and other terpenoid-quinone biosynthesis;;ko00945|Stilbenoid, diarylheptanoid and gingerol biosynthesis;;ko00940|Phenylpropanoid biosynthesis;;ko00360|Phenylalanine metabolism;;ko00941|Flavonoid biosynthesis;;	molecular_function:metal ion binding(GO:0046872);;biological_process:oxidation-reduction process(GO:0055114);;molecular_function:monooxygenase activity(GO:0004497);;molecular_function:oxidoreductase activity(GO:0016491);;molecular_function:trans-cinnamate 4-monooxygenase activity(GO:0016710)	O24312|TCMO_POPTM|-162.7|Trans-cinnamate 4-monooxygenase OS=Populus tremuloides GN=CYP73A13 PE=2 SV=1	3694.POPTR_0013s15380.1|-161.9|COG2124|Q|Cytochrome p450	PF00067.21|p450|5.3e-82|Cytochrome P450
c61149/f1p35/2029	AEM44785.1|0x1.4d0bddc4760fdp-1010|4-coumarate:coenzyme A ligase [Allium sativum]	vvi:100254698|-233.4|K01904|4CL; 4-coumarate--CoA ligase [EC:6.2.1.12]|ko00940|Phenylpropanoid biosynthesis;;ko00130|Ubiquinone and other terpenoid-quinone biosynthesis;;ko00360|Phenylalanine metabolism;;	molecular_function:4-coumarate-CoA ligase activity(GO:0016207);;molecular_function:ligase activity(GO:0016874);;molecular_function:nucleotide binding(GO:0000166);;molecular_function:ATP binding(GO:0005524);;biological_process:phenylpropanoid metabolic process(GO:0009698)	O24145|4CL1_TOBAC|-229.2|4-coumarate--CoA ligase 1 OS=Nicotiana tabacum GN=4CL1 PE=2 SV=1	29760.VIT_11s0052g01090.t01|-234.6|COG0318|IQ|Amp-dependent synthetase and ligase	PF00501.27|AMP-binding|5.4e-107|AMP-binding enzyme
c261046/f2p6/2013	PKU85016.1|0x1.7f72ab9ecad17p-488|4-coumarate--CoA ligase-like 7 [Dendrobium catenatum]	atr:18432876|-127.5|K01904|4CL; 4-coumarate--CoA ligase [EC:6.2.1.12]|ko00940|Phenylpropanoid biosynthesis;;ko00130|Ubiquinone and other terpenoid-quinone biosynthesis;;ko00360|Phenylalanine metabolism;;	cellular_component:peroxisome(GO:0005777);;molecular_function:ligase activity(GO:0016874);;molecular_function:nucleotide binding(GO:0000166);;molecular_function:ATP binding(GO:0005524);;cellular_component:peroxisome(GO:0005777)	Q84P25|4CLL2_ARATH|-27.5|4-coumarate--CoA ligase-like 2 OS=Arabidopsis thaliana GN=4CLL2 PE=2 SV=2	59689.fgenesh2_kg.6__3300__AT4G05160.1|-128.7|COG0318|IQ|Amp-dependent synthetase and ligase	PF00501.27|AMP-binding|6.5e-94|AMP-binding enzyme
c9430/f1p36/1338	AEM44785.1|0x1.43e4a06442e34p-451|4-coumarate:coenzyme A ligase [Allium sativum]	pda:103718393|-116.4|K01904|4CL; 4-coumarate--CoA ligase [EC:6.2.1.12]|ko00940|Phenylpropanoid biosynthesis;;ko00130|Ubiquinone and other terpenoid-quinone biosynthesis;;ko00360|Phenylalanine metabolism;;	molecular_function:4-coumarate-CoA ligase activity(GO:0016207);;molecular_function:ligase activity(GO:0016874);;molecular_function:nucleotide binding(GO:0000166);;molecular_function:ATP binding(GO:0005524);;biological_process:phenylpropanoid metabolic process(GO:0009698)	Q6ZAC1|4CL5_ORYSJ|-113.2|Probable 4-coumarate--CoA ligase 5 OS=Oryza sativa subsp. japonica GN=4CL5 PE=2 SV=1	29760.VIT_11s0052g01090.t01|-116.0|COG0318|IQ|Amp-dependent synthetase and ligase	PF00501.27|AMP-binding|7.1e-45|AMP-binding enzyme
c1076/f3p52/2334	AGZ95691.1|0x1.910d8050b1169p-566|phenylalanine ammonia-lyase [Allium cepa]	pda:103718264|-138.1|K10775|PAL; phenylalanine ammonia-lyase [EC:4.3.1.24]|ko00940|Phenylpropanoid biosynthesis;;ko00360|Phenylalanine metabolism;;	biological_process:cinnamic acid biosynthetic process(GO:0009800);;molecular_function:lyase activity(GO:0016829);;molecular_function:phenylalanine ammonia-lyase activity(GO:0045548);;cellular_component:cytoplasm(GO:0005737);;cellular_component:cytoplasm(GO:0005737);;biological_process:phenylpropanoid metabolic process(GO:0009698)	Q42609|PALY_BROFI|-136.2|Phenylalanine ammonia-lyase OS=Bromheadia finlaysoniana GN=PAL PE=2 SV=1	4641.GSMUA_Achr1P09070_001|-139.0|COG2986|E|histidine ammonia-lyase	PF00221.18|Lyase_aromatic|1.2e-83|Aromatic amino acid lyase
c12491/f1p3/1162	XP_010681225.1|0x1.ebaa3910b462dp-147|PREDICTED: peroxidase 12 [Beta vulgaris subsp. vulgaris]_x0001_KMT19595.1 hypothetical protein BVRB_1g012110 [Beta vulgaris subsp. vulgaris]	bvg:104896205|-44.9|K00430|E1.11.1.7; peroxidase [EC:1.11.1.7]|ko00940|Phenylpropanoid biosynthesis;;	cellular_component:extracellular region(GO:0005576);;cellular_component:vacuole(GO:0005773);;cellular_component:vacuole(GO:0005773);;molecular_function:oxidoreductase activity(GO:0016491);;biological_process:hydrogen peroxide catabolic process(GO:0042744);;molecular_function:metal ion binding(GO:0046872);;biological_process:oxidation-reduction process(GO:0055114);;molecular_function:peroxidase ac…	Q96520|PER12_ARATH|-38.6|Peroxidase 12 OS=Arabidopsis thaliana GN=PER12 PE=1 SV=1	3847.GLYMA10G36680.1|-43.1|ENOG410ZMT4|G|peroxidase	-
c14606/f1p46/3127	AGZ95691.1|0x1.72bca594da28fp-229|phenylalanine ammonia-lyase [Allium cepa]	cic:CICLE_v10011175mg|-63.6|K10775|PAL; phenylalanine ammonia-lyase [EC:4.3.1.24]|ko00940|Phenylpropanoid biosynthesis;;ko00360|Phenylalanine metabolism;;	biological_process:cinnamic acid biosynthetic process(GO:0009800);;molecular_function:lyase activity(GO:0016829);;molecular_function:phenylalanine ammonia-lyase activity(GO:0045548);;cellular_component:cytoplasm(GO:0005737);;cellular_component:cytoplasm(GO:0005737);;biological_process:phenylpropanoid metabolic process(GO:0009698)	P45729|PAL3_PETCR|-66.3|Phenylalanine ammonia-lyase 3 OS=Petroselinum crispum GN=PAL3 PE=2 SV=1	4641.GSMUA_Achr11P22840_001|-64.4|COG2986|E|histidine ammonia-lyase	PF00221.18|Lyase_aromatic|1.4e-35|Aromatic amino acid lyase
c87606/f1p10/1076	AGZ95691.1|0x1.6cf9fe692c60ap-300|phenylalanine ammonia-lyase [Allium cepa]	cic:CICLE_v10011175mg|-80.5|K10775|PAL; phenylalanine ammonia-lyase [EC:4.3.1.24]|ko00940|Phenylpropanoid biosynthesis;;ko00360|Phenylalanine metabolism;;	biological_process:cinnamic acid biosynthetic process(GO:0009800);;molecular_function:lyase activity(GO:0016829);;molecular_function:phenylalanine ammonia-lyase activity(GO:0045548);;cellular_component:cytoplasm(GO:0005737);;cellular_component:cytoplasm(GO:0005737);;biological_process:phenylpropanoid metabolic process(GO:0009698)	O64963|PAL1_PRUAV|-82.6|Phenylalanine ammonia-lyase 1 OS=Prunus avium GN=PAL1 PE=2 SV=1	3694.POPTR_0010s23100.1|-81.2|COG2986|E|histidine ammonia-lyase	-
c68310/f1p8/2095	ADO24189.1|0x1.bf4665b338098p-200|phenylalanine ammonia-lyase [Allium sativum]	fve:101315259|-36.6|K10775|PAL; phenylalanine ammonia-lyase [EC:4.3.1.24]|ko00940|Phenylpropanoid biosynthesis;;ko00360|Phenylalanine metabolism;;	biological_process:cinnamic acid biosynthetic process(GO:0009800);;molecular_function:lyase activity(GO:0016829);;molecular_function:phenylalanine ammonia-lyase activity(GO:0045548);;cellular_component:cytoplasm(GO:0005737);;cellular_component:cytoplasm(GO:0005737);;biological_process:phenylpropanoid metabolic process(GO:0009698)	P45729|PAL3_PETCR|-38.3|Phenylalanine ammonia-lyase 3 OS=Petroselinum crispum GN=PAL3 PE=2 SV=1	39946.BGIOSGA005999-PA|-37.9|COG2986|E|histidine ammonia-lyase	-
c174936/f2p3/1715	XP_020241182.1|0x1.139826d83ab75p-820|aldehyde dehydrogenase family 2 member C4-like [Asparagus officinalis]	egu:105048589|-235.8|K12355|REF1; coniferyl-aldehyde dehydrogenase [EC:1.2.1.68]|ko00940|Phenylpropanoid biosynthesis;;	molecular_function:oxidoreductase activity(GO:0016491);;biological_process:oxidation-reduction process(GO:0055114);;molecular_function:aldehyde dehydrogenase (NAD) activity(GO:0004029);;cellular_component:cytoplasm(GO:0005737);;cellular_component:cytosol(GO:0005829)	Q56YU0|AL2C4_ARATH|-210.7|Aldehyde dehydrogenase family 2 member C4 OS=Arabidopsis thaliana GN=ALDH2C4 PE=1 SV=2	4538.ORGLA01G0169500.1|-231.2|COG1012|C|Dehydrogenase	PF00171.21|Aldedh|6.3e-180|Aldehyde dehydrogenase family
c22433/f1p2/1336	XP_020107531.1|0x1.6962e4b2e7418p-412|peroxidase 12-like [Ananas comosus]	pda:103704375|-124.5|K00430|E1.11.1.7; peroxidase [EC:1.11.1.7]|ko00940|Phenylpropanoid biosynthesis;;	cellular_component:extracellular region(GO:0005576);;cellular_component:vacuole(GO:0005773);;cellular_component:vacuole(GO:0005773);;molecular_function:oxidoreductase activity(GO:0016491);;biological_process:hydrogen peroxide catabolic process(GO:0042744);;molecular_function:metal ion binding(GO:0046872);;biological_process:oxidation-reduction process(GO:0055114);;molecular_function:peroxidase ac…	Q96520|PER12_ARATH|-106.1|Peroxidase 12 OS=Arabidopsis thaliana GN=PER12 PE=1 SV=1	3847.GLYMA10G36680.1|-115.4|ENOG410ZMT4|G|peroxidase	PF00141.22|peroxidase|1.8e-76|Peroxidase
c86756/f1p3/1001	XP_020249967.1|0x1.444681acd5df7p-352|beta-glucosidase 12-like isoform X3 [Asparagus officinalis]_x0001_ONK55428.1 uncharacterized protein A4U43_UnF3530 [Asparagus officinalis]	egr:104433813|-102.1|K01188|E3.2.1.21; beta-glucosidase [EC:3.2.1.21]|ko00940|Phenylpropanoid biosynthesis;;ko00460|Cyanoamino acid metabolism;;ko00500|Starch and sucrose metabolism;;	molecular_function:hydrolase activity, acting on glycosyl bonds(GO:0016798);;molecular_function:scopolin beta-glucosidase activity(GO:0102483);;biological_process:metabolic process(GO:0008152);;molecular_function:beta-glucosidase activity(GO:0008422);;molecular_function:hydrolase activity(GO:0016787)	Q7XKV2|BGL13_ORYSJ|-101.0|Beta-glucosidase 13 OS=Oryza sativa subsp. japonica GN=BGLU13 PE=2 SV=2	4538.ORGLA04G0129100.1|-100.1|COG2723|G|beta-glucosidase	PF00232.17|Glyco_hydro_1|7e-82|Glycosyl hydrolase family 1
c116256/f2p5/1450	XP_020102624.1|0x1.c55f84e063451p-344|probable cinnamyl alcohol dehydrogenase 5 [Ananas comosus]	pda:103723340|-103.0|K00083|E1.1.1.195; cinnamyl-alcohol dehydrogenase [EC:1.1.1.195]|ko00940|Phenylpropanoid biosynthesis;;	biological_process:oxidation-reduction process(GO:0055114);;molecular_function:oxidoreductase activity(GO:0016491);;molecular_function:mannitol dehydrogenase activity(GO:0046029);;molecular_function:metal ion binding(GO:0046872)	O82515|MTDH_MEDSA|-95.4|Probable mannitol dehydrogenase OS=Medicago sativa GN=CAD1 PE=1 SV=1	4641.GSMUA_Achr9P30860_001|-100.5|COG1064|C|alcohol dehydrogenase	-
c4585/f1p561/3767	XP_020250713.1|0x1.c6f2a0a4de46dp-170|beta-galactosidase isoform X1 [Asparagus officinalis]	-	molecular_function:hydrolase activity(GO:0016787);;molecular_function:hydrolase activity, acting on glycosyl bonds(GO:0016798);;cellular_component:apoplast(GO:0048046);;cellular_component:apoplast(GO:0048046);;molecular_function:beta-galactosidase activity(GO:0004565);;cellular_component:extracellular region(GO:0005576);;biological_process:metabolic process(GO:0008152)	P45582|BGAL_ASPOF|-54.4|Beta-galactosidase OS=Asparagus officinalis PE=2 SV=1	15368.BRADI2G41830.1|-50.4|COG1874|G|beta-galactosidase	-
c2519/f1p62/4768	XP_020268879.1|0x1.013c56ed6b18dp-917|protein transport protein Sec24-like At3g07100 [Asparagus officinalis]_x0001_XP_020268880.1 protein transport protein Sec24-like At3g07100 [Asparagus officinalis]_x0001_ONK66293.1 uncharacterized protein A4U43_C06F6200 [Asparagus officinalis]	mus:103982380|-269.1|K14007|SEC24; protein transport protein SEC24|ko04141|Protein processing in endoplasmic reticulum;;	cellular_component:Golgi apparatus(GO:0005794);;biological_process:protein transport(GO:0015031);;cellular_component:membrane(GO:0016020);;biological_process:vesicle-mediated transport(GO:0016192);;cellular_component:endoplasmic reticulum-Golgi intermediate compartment membrane(GO:0033116);;cellular_component:Golgi membrane(GO:0000139);;cellular_component:endoplasmic reticulum(GO:0005783);;cellul…	Q9SFU0|SC24A_ARATH|-246.2|Protein transport protein Sec24-like At3g07100 OS=Arabidopsis thaliana GN=At3g07100 PE=2 SV=2	4641.GSMUA_Achr1P10740_001|-268.8|COG5028|U|SEC24 family, member	PF04811.14|Sec23_trunk|7.9e-79|Sec23/Sec24 trunk domain
c40921/f1p66/2799	XP_020267278.1|0x1.2019a5db0504bp-693|110 kDa U5 small nuclear ribonucleoprotein component CLO [Asparagus officinalis]	bvg:104905180|-206.4|K12852|EFTUD2; 116 kDa U5 small nuclear ribonucleoprotein component|ko03040|Spliceosome;;	molecular_function:GTP binding(GO:0005525);;cellular_component:nucleus(GO:0005634);;cellular_component:spliceosomal complex(GO:0005681);;biological_process:mRNA processing(GO:0006397);;biological_process:RNA splicing(GO:0008380);;cellular_component:nuclear speck(GO:0016607);;biological_process:floral organ development(GO:0048437);;molecular_function:nucleotide binding(GO:0000166);;molecular_funct…	Q9LNC5|CLO_ARATH|-203.1|110 kDa U5 small nuclear ribonucleoprotein component CLO OS=Arabidopsis thaliana GN=CLO PE=1 SV=1	29760.VIT_11s0118g00720.t01|-206.0|COG0480|J|Catalyzes the GTP-dependent ribosomal translocation step during translation elongation. During this step, the ribosome changes from the pre-translocational (PRE) to the post- translocational (POST) state as the newly formed A-site-bound peptidyl-tRNA and P-site-bound deacylated tRNA move to the P and E sites, respectively. Catalyzes the coordinated mov…	-
c42447/f1p5/1619	XP_010924896.1|0x1.294beff4664cfp-80|PREDICTED: protein transport protein Sec24-like At3g07100 [Elaeis guineensis]_x0001_XP_010924905.1 PREDICTED: protein transport protein Sec24-like At3g07100 [Elaeis guineensis]	egu:105047600|-24.9|K14007|SEC24; protein transport protein SEC24|ko04141|Protein processing in endoplasmic reticulum;;	-	-	4538.ORGLA04G0011200.1|-25.8|COG5028|U|SEC24 family, member	-
c60417/f1p0/1304	GAV85687.1|0x1.5d88fa35ac2a2p-86|GatB_Yqey domain-containing protein/GatB_N domain-containing protein [Cephalotus follicularis]	pop:POPTR_0008s17260g|-26.5|K02434|gatB, PET112; aspartyl-tRNA(Asn)/glutamyl-tRNA(Gln) amidotransferase subunit B [EC:6.3.5.6 6.3.5.7]|ko00970|Aminoacyl-tRNA biosynthesis;;	cellular_component:mitochondrion(GO:0005739);;biological_process:translation(GO:0006412);;cellular_component:chloroplast(GO:0009507);;cellular_component:chloroplast(GO:0009507);;cellular_component:plastid(GO:0009536);;molecular_function:ligase activity(GO:0016874);;molecular_function:nucleotide binding(GO:0000166);;molecular_function:ATP binding(GO:0005524);;cellular_component:mitochondrion(GO:00…	B9SQR9|GATB_RICCO|-27.6|Glutamyl-tRNA(Gln) amidotransferase subunit B, chloroplastic/mitochondrial OS=Ricinus communis GN=GATB PE=3 SV=1	3694.POPTR_0008s17260.1|-27.9|COG0064|J|Allows the formation of correctly charged Asn-tRNA(Asn) or Gln-tRNA(Gln) through the transamidation of misacylated Asp- tRNA(Asn) or Glu-tRNA(Gln) in organisms which lack either or both of asparaginyl-tRNA or glutaminyl-tRNA synthetases. The reaction takes place in the presence of glutamine and ATP through an activated phospho-Asp-tRNA(Asn) or phospho-Glu-t…	-
c109767/f1p7/1048	XP_020261286.1|0x1.5ed298b10022fp-180|probable prefoldin subunit 2 [Asparagus officinalis]_x0001_XP_020261287.1 probable prefoldin subunit 2 [Asparagus officinalis]	-	-	Q9LJ98|PFD2_ARATH|-44.4|Probable prefoldin subunit 2 OS=Arabidopsis thaliana GN=At3g22480 PE=2 SV=1	29760.VIT_05s0020g03500.t01|-52.0|ENOG4111S6I|O|prefoldin subunit 2	-
c16445/f1p102/2831	XP_020247150.1|0x1.5d3e7a69ad82bp-578|peroxisomal fatty acid beta-oxidation multifunctional protein [Asparagus officinalis]_x0001_ONK80432.1 uncharacterized protein A4U43_C01F17660 [Asparagus officinalis]	mus:103991664|-162.0|K10527|MFP2; enoyl-CoA hydratase/3-hydroxyacyl-CoA dehydrogenase [EC:4.2.1.17 1.1.1.35 1.1.1.211]|ko01212|Fatty acid metabolism;;ko00592|alpha-Linolenic acid metabolism;;ko00071|Fatty acid degradation;;	molecular_function:isomerase activity(GO:0016853);;biological_process:fatty acid metabolic process(GO:0006631);;molecular_function:3-hydroxyacyl-CoA dehydrogenase activity(GO:0003857);;molecular_function:3-hydroxyacyl-CoA dehydratase activity(GO:0018812);;biological_process:fatty acid beta-oxidation(GO:0006635);;molecular_function:dodecenoyl-CoA delta-isomerase activity(GO:0004165);;biological_pr…	Q8W1L6|MFP_ORYSJ|-158.4|Peroxisomal fatty acid beta-oxidation multifunctional protein OS=Oryza sativa subsp. japonica GN=MFP PE=1 SV=2	4641.GSMUA_Achr7P14420_001|-163.2|COG1250|I|Dehydrogenase	PF02737.17|3HCDH_N|1.5e-40|3-hydroxyacyl-CoA dehydrogenase, NAD binding domain
c5012/f1p7/1351	XP_009401450.1|0x1.3d5a4824ab6efp-59|PREDICTED: uncharacterized protein LOC103985472 [Musa acuminata subsp. malaccensis]	-	-	-	4641.GSMUA_Achr5P22860_001|-19.8|COG0184|J|Forms an intersubunit bridge (bridge B4) with the 23S rRNA of the 50S subunit in the ribosome (By similarity)	-
c26049/f1p16/1949	XP_009387556.1|0x1.ac2eb204c8741p-616|PREDICTED: scarecrow-like transcription factor PAT1 [Musa acuminata subsp. malaccensis]	-	biological_process:regulation of transcription, DNA-templated(GO:0006355);;cellular_component:nucleus(GO:0005634);;cellular_component:nucleus(GO:0005634);;biological_process:transcription, DNA-templated(GO:0006351)	Q8GVE1|CIGR2_ORYSJ|-171.8|Chitin-inducible gibberellin-responsive protein 2 OS=Oryza sativa subsp. japonica GN=CIGR2 PE=2 SV=1	4081.Solyc07g047950.1.1|-172.0|ENOG4111JS8|K|chitin-inducible gibberellin-responsive protein	PF03514.13|GRAS|2.3e-132|GRAS domain family
c121469/f1p5/1755	XP_010927462.1|0x1.19174f4108bccp-83|PREDICTED: rab escort protein 1 [Elaeis guineensis]	-	-	-	4641.GSMUA_Achr6P03390_001|-24.5|COG5044|O|GDP dissociation inhibitor	-
c2536/f1p280/4788	OVA14511.1|0x1.f653ca63e07d5p-856|Pyrophosphate-energised proton pump [Macleaya cordata]	mus:103985418|-256.7|K01507|ppa; inorganic pyrophosphatase [EC:3.6.1.1]|ko00190|Oxidative phosphorylation;;	cellular_component:vacuolar membrane(GO:0005774);;cellular_component:plasma membrane(GO:0005886);;cellular_component:plasma membrane(GO:0005886);;biological_process:ion transport(GO:0006811);;cellular_component:endosome membrane(GO:0010008);;biological_process:proton transport(GO:0015992);;cellular_component:membrane(GO:0016020);;cellular_component:integral component of membrane(GO:0016021);;mole…	P31414|AVP1_ARATH|-253.5|Pyrophosphate-energized vacuolar membrane proton pump 1 OS=Arabidopsis thaliana GN=AVP1 PE=1 SV=1	4641.GSMUA_Achr5P23480_001|-258.0|COG3808|C|pump that utilizes the energy of pyrophosphate hydrolysis as the driving force for	PF03030.15|H_PPase|5.6e-176|Inorganic H+ pyrophosphatase
c29422/f1p11/2835	XP_020262688.1|0x1.a1613bc90cae5p-214|BUD13 homolog, partial [Asparagus officinalis]	-	-	-	4641.GSMUA_AchrUn_randomP03990_001|-60.5|ENOG410XSEZ|S|BUD13 homolog (S. cerevisiae)	-
c17552/f1p40/2113	XP_021636593.1|0x1.953caacf62e09p-102|cytochrome P450 71A1-like [Hevea brasiliensis]	-	cellular_component:integral component of membrane(GO:0016021);;molecular_function:oxidoreductase activity(GO:0016491);;molecular_function:metal ion binding(GO:0046872);;biological_process:oxidation-reduction process(GO:0055114);;molecular_function:monooxygenase activity(GO:0004497);;cellular_component:membrane(GO:0016020);;cellular_component:membrane(GO:0016020)	Q9LVD2|C71BA_ARATH|-31.7|Cytochrome P450 71B10 OS=Arabidopsis thaliana GN=CYP71B10 PE=3 SV=1	59689.fgenesh1_pg.C_scaffold_5000381|-31.1|COG2124|Q|Cytochrome p450	-
c6703/f1p29/2377	ONK65853.1|0x0p+0|uncharacterized protein A4U43_C06F1640 [Asparagus officinalis]	-	cellular_component:nucleus(GO:0005634);;cellular_component:nucleus(GO:0005634);;cellular_component:nucleus(GO:0005634);;biological_process:nucleosome assembly(GO:0006334);;biological_process:transcription, DNA-templated(GO:0006351);;biological_process:regulation of transcription, DNA-templated(GO:0006355);;biological_process:multicellular organism development(GO:0007275);;biological_process:respo…	F4IF36|FGT1_ARATH|-302.2|Protein FORGETTER 1 OS=Arabidopsis thaliana GN=FGT1 PE=1 SV=1	29760.VIT_19s0085g01020.t01|-10000.0|ENOG410XQ7Q|S|Strawberry notch homolog	PF13871.5|Helicase_C_4|7.8e-109|C-terminal domain on Strawberry notch homologue
c59095/f1p6/1886	ONK70602.1|0x1.cbd9761c111d2p-391|uncharacterized protein A4U43_C05F35460 [Asparagus officinalis]	-	-	-	4533.OB04G31470.1|-107.6|ENOG410YDP6|S|dna binding protein	PF02485.20|Branch|1.4e-60|Core-2/I-Branching enzyme
c29442/f1p48/1515	ONK69550.1|0x1.03123b86ed038p-587|uncharacterized protein A4U43_C05F24150 [Asparagus officinalis]	-	molecular_function:protein binding(GO:0005515);;cellular_component:nucleus(GO:0005634);;cellular_component:nucleus(GO:0005634);;biological_process:mRNA processing(GO:0006397);;biological_process:RNA splicing(GO:0008380);;biological_process:RNA splicing(GO:0008380);;cellular_component:nuclear dicing body(GO:0010445);;cellular_component:nuclear speck(GO:0016607);;biological_process:gene silencing b…	Q9ZVD0|SRRT_ARATH|-149.6|Serrate RNA effector molecule OS=Arabidopsis thaliana GN=SE PE=1 SV=2	4641.GSMUA_Achr10P30900_001|-171.6|ENOG410XR8S|K|Serrate RNA effector molecule homolog	PF04959.12|ARS2|2.9e-29|Arsenite-resistance protein 2
c178884/f1p14/1776	XP_006378702.1|0x1.3a8eb19ded968p-184|hypothetical protein POPTR_0010s20990g [Populus trichocarpa]_x0001_ERP56499.1 hypothetical protein POPTR_0010s20990g [Populus trichocarpa]	-	biological_process:transcription, DNA-templated(GO:0006351);;biological_process:regulation of transcription, DNA-templated(GO:0006355);;molecular_function:DNA binding(GO:0003677);;cellular_component:nucleus(GO:0005634);;cellular_component:nucleus(GO:0005634)	Q9C7B1|TRP3_ARATH|-42.4|Telomere repeat-binding protein 3 OS=Arabidopsis thaliana GN=TRP3 PE=1 SV=1	3694.POPTR_0010s20990.1|-57.4|ENOG4111C5T|K|Telomere repeat-binding protein	-
c90868/f1p4/1159	XP_020275780.1|0x1.f41a0320f4e7p-375|E3 ubiquitin-protein ligase SDIR1 isoform X2 [Asparagus officinalis]_x0001_ONK62207.1 uncharacterized protein A4U43_C07F1480 [Asparagus officinalis]	-	biological_process:protein ubiquitination(GO:0016567);;molecular_function:transferase activity(GO:0016740);;cellular_component:organelle membrane(GO:0031090);;cellular_component:intracellular membrane-bounded organelle(GO:0043231);;molecular_function:metal ion binding(GO:0046872);;cellular_component:endoplasmic reticulum(GO:0005783);;cellular_component:membrane(GO:0016020);;cellular_component:int…	Q9M2S6|SDIR1_ARATH|-64.4|E3 ubiquitin-protein ligase SDIR1 OS=Arabidopsis thaliana GN=SDIR1 PE=1 SV=1	29760.VIT_13s0019g01960.t01|-109.5|ENOG41121N2|O|zinc ion binding	-
c25085/f1p46/1611	EEE66652.1|0x1.7394b9e894b9bp-250|hypothetical protein OsJ_23273 [Oryza sativa Japonica Group]	-	biological_process:multicellular organism development(GO:0007275);;biological_process:flower development(GO:0009908);;biological_process:cell differentiation(GO:0030154)	Q9LUV4|FRL4A_ARATH|-69.4|FRIGIDA-like protein 4a OS=Arabidopsis thaliana GN=FRL4A PE=2 SV=1	4538.ORGLA07G0040200.1|-78.2|ENOG410YC7X|S|Frigida-like protein	PF07899.10|Frigida|5.6e-72|Frigida-like protein
c25397/f1p6/1311	XP_021827610.1|0x1.67d539e019632p-102|zinc finger BED domain-containing protein DAYSLEEPER-like [Prunus avium]	-	-	-	-	-
c26116/f2p98/1289	CAN79752.1|0x1.4198b7462ec6p-67|hypothetical protein VITISV_041136 [Vitis vinifera]	-	-	-	-	-
c27620/f1p2/2503	XP_020257640.1|0x1.3f2bcafbff332p-375|magnesium transporter MRS2-5 isoform X1 [Asparagus officinalis]_x0001_ONK75815.1 uncharacterized protein A4U43_C03F20860 [Asparagus officinalis]	-	cellular_component:integral component of membrane(GO:0016021);;biological_process:ion transport(GO:0006811);;cellular_component:membrane(GO:0016020);;cellular_component:membrane(GO:0016020)	Q67UQ7|MRS2B_ORYSJ|-41.5|Magnesium transporter MRS2-B OS=Oryza sativa subsp. japonica GN=MRS2-B PE=2 SV=1	4641.GSMUA_Achr11P09590_001|-102.9|ENOG410XNNZ|U|Magnesium transporter	-
c17074/f1p351/3901	XP_008362574.2|0x1.13c42fd002b66p-152|PREDICTED: probable polyamine oxidase 4, partial [Malus domestica]	pper:PRUPE_ppa005268mg|-48.2|K17839|PAO4, PAO3, PAO2; polyamine oxidase [EC:1.5.3.17 1.5.3.-]|ko00330|Arginine and proline metabolism;;ko00410|beta-Alanine metabolism;;	molecular_function:norspermine:oxygen oxidoreductase activity(GO:0052894);;molecular_function:N1-acetylspermine:oxygen oxidoreductase (N1-acetylspermidine-forming) activity(GO:0052895);;molecular_function:spermine:oxygen oxidoreductase (spermidine-forming) activity(GO:0052901);;biological_process:oxidation-reduction process(GO:0055114);;cellular_component:peroxisome(GO:0005777);;cellular_componen…	Q8H191|PAO4_ARATH|-45.6|Probable polyamine oxidase 4 OS=Arabidopsis thaliana GN=PAO4 PE=1 SV=1	3847.GLYMA18G05140.1|-47.9|ENOG410XSNC|S|amine oxidase	PF01593.23|Amino_oxidase|3e-31|Flavin containing amine oxidoreductase
c66005/f1p2/970	AGI98133.1|0x1.7d55415c27bbfp-321|cytochrome P450 CYP81 [Narcissus tazetta]	-	cellular_component:integral component of membrane(GO:0016021);;molecular_function:oxidoreductase activity(GO:0016491);;molecular_function:metal ion binding(GO:0046872);;biological_process:oxidation-reduction process(GO:0055114);;molecular_function:monooxygenase activity(GO:0004497);;cellular_component:membrane(GO:0016020);;cellular_component:membrane(GO:0016020)	Q9FG65|C81D1_ARATH|-64.9|Cytochrome P450 81D1 OS=Arabidopsis thaliana GN=CYP81D1 PE=2 SV=1	4577.GRMZM2G013357_P01|-84.3|COG2124|Q|Cytochrome p450	PF00067.21|p450|2.1e-65|Cytochrome P450
c28050/f1p258/1827	ACN78838.1|0x1.9b0179dd4b64p-784|alliinase [Allium sativum]	-	molecular_function:alliin lyase activity(GO:0047654);;cellular_component:vacuole(GO:0005773);;cellular_component:vacuole(GO:0005773);;molecular_function:lyase activity(GO:0016829)	Q41233|ALLN2_ALLSA|-238.1|Alliin lyase 2 OS=Allium sativum PE=1 SV=1	29760.VIT_18s0157g00140.t01|-100.5|ENOG410XS9Z|S|tryptophan aminotransferase-related protein 4-like	PF04864.12|Alliinase_C|3.1e-173|Allinase
c29714/f1p9/2992	XP_020254582.1|0x1.49c9389f02dc5p-407|triacylglycerol lipase SDP1 [Asparagus officinalis]_x0001_ONK78433.1 uncharacterized protein A4U43_C02F18710 [Asparagus officinalis]	cam:101509590|-82.3|K14674|TGL4; TAG lipase / steryl ester hydrolase / phospholipase A2 / LPA acyltransferase [EC:3.1.1.3 3.1.1.13 3.1.1.4 2.3.1.51]|ko00564|Glycerophospholipid metabolism;;ko00592|alpha-Linolenic acid metabolism;;ko00561|Glycerolipid metabolism;;ko00591|Linoleic acid metabolism;;ko00565|Ether lipid metabolism;;ko00100|Steroid biosynthesis;;ko00590|Arachidonic acid metabolism;;	biological_process:glycerol metabolic process(GO:0006071);;biological_process:lipid metabolic process(GO:0006629);;cellular_component:membrane(GO:0016020);;cellular_component:membrane(GO:0016020);;cellular_component:integral component of membrane(GO:0016021);;biological_process:lipid catabolic process(GO:0016042);;molecular_function:hydrolase activity(GO:0016787);;molecular_function:triglyceride …	Q9LZA6|SDP1_ARATH|-79.6|Triacylglycerol lipase SDP1 OS=Arabidopsis thaliana GN=SDP1 PE=1 SV=1	3711.Bra009491.1-P|-78.7|COG1752|S|K07001 NTE family protein	-
c1/f1p15/6963	XP_020248019.1|0x1.ac8383df0fa73p-89|sporulation-specific protein 15-like [Asparagus officinalis]_x0001_XP_020248020.1 sporulation-specific protein 15-like [Asparagus officinalis]	-	-	-	-	-
c31909/f1p2/3062	XP_020267653.1|0x1.e9ba7d059368cp-729|protein DA1-related 2 [Asparagus officinalis]	-	molecular_function:ubiquitin binding(GO:0043130);;molecular_function:metal ion binding(GO:0046872)	Q0WSN2|DAR2_ARATH|-169.7|Protein DA1-related 2 OS=Arabidopsis thaliana GN=DAR2 PE=2 SV=1	4641.GSMUA_Achr10P02350_001|-209.7|ENOG410XRD4|S|PDZ and LIM domain	PF12315.7|DA1-like|9.2e-98|Protein DA1
c40360/f1p37/2325	XP_020273310.1|0x1.f63dcf875d76cp-885|elongation factor-like GTPase 1 isoform X2 [Asparagus officinalis]	pda:103721162|-259.8|K14536|RIA1; ribosome assembly protein 1 [EC:3.6.5.-]|ko03008|Ribosome biogenesis in eukaryotes;;	-	-	4577.GRMZM2G134982_P01|-236.5|COG0480|J|Catalyzes the GTP-dependent ribosomal translocation step during translation elongation. During this step, the ribosome changes from the pre-translocational (PRE) to the post- translocational (POST) state as the newly formed A-site-bound peptidyl-tRNA and P-site-bound deacylated tRNA move to the P and E sites, respectively. Catalyzes the coordinated movement…	-
c226246/f1p5/1148	XP_009418135.1|0x1.db54ee51eb7e5p-151|PREDICTED: neurogenic protein mastermind-like [Musa acuminata subsp. malaccensis]	-	molecular_function:metal ion binding(GO:0046872)	A2RVM8|HIP37_ARATH|-26.2|Heavy metal-associated isoprenylated plant protein 37 OS=Arabidopsis thaliana GN=HIPP37 PE=2 SV=1	4641.GSMUA_Achr9P19310_001|-47.3|COG2608|S|heavy metal transport detoxification protein	-
c227616/f1p5/1764	XP_020260256.1|0x1.758f004382388p-105|uncharacterized aarF domain-containing protein kinase 1-like [Asparagus officinalis]_x0001_ONK71185.1 uncharacterized protein A4U43_C04F5760 [Asparagus officinalis]	-	-	-	4641.GSMUA_AchrUn_randomP14300_001|-29.9|COG0661|S|Required, probably indirectly, for the hydroxylation of 2-octaprenylphenol to 2-octaprenyl-6-hydroxy-phenol, the fourth step in ubiquinone biosynthesis (By similarity)	-
c1917/f2p0/1364	XP_009400919.1|0x1.4a56ba8f150b9p-79|PREDICTED: alpha-1,2-galactosyltransferase gmh3-like [Musa acuminata subsp. malaccensis]	-	-	-	4641.GSMUA_Achr5P15560_001|-25.9|ENOG4110IRM|S|galactosyl transferase GMA12/MNN10 family	-
c33469/f1p88/3010	ONK61304.1|0x1.5b1fc3eacf929p-637|uncharacterized protein A4U43_C08F28330 [Asparagus officinalis]	mtr:MTR_1g112870|-190.6|K02147|ATPeV1B, ATP6B; V-type H+-transporting ATPase subunit B|ko04145|Phagosome;;ko00190|Oxidative phosphorylation;;	biological_process:proton transport(GO:0015992);;cellular_component:membrane(GO:0016020);;molecular_function:hydrolase activity(GO:0016787);;cellular_component:vacuole(GO:0005773);;cellular_component:vacuolar membrane(GO:0005774);;biological_process:ion transport(GO:0006811)	Q9SZN1|VATB2_ARATH|-190.6|V-type proton ATPase subunit B2 OS=Arabidopsis thaliana GN=VHA-B2 PE=1 SV=1	3847.GLYMA18G48280.1|-190.5|COG1156|C|Produces ATP from ADP in the presence of a proton gradient across the membrane. The V-type beta chain is a regulatory subunit (By similarity)	PF00006.24|ATP-synt_ab|4.5e-68|ATP synthase alpha/beta family, nucleotide-binding domain
c2031/f1p57/4455	OAY72485.1|0x1.5d902e71f96a8p-761|Methyltransferase-like protein 1 [Ananas comosus]	-	molecular_function:methyltransferase activity(GO:0008168);;molecular_function:transferase activity(GO:0016740);;biological_process:methylation(GO:0032259)	Q94AI4|METL1_ARATH|-135.2|Methyltransferase-like protein 1 OS=Arabidopsis thaliana GN=EMB1691 PE=2 SV=1	4113.PGSC0003DMT400059978|-208.6|ENOG410XQ0H|S|Methyltransferase like 14	PF05063.13|MT-A70|2.3e-52|MT-A70
c36522/f2p4/1099	XP_020263723.1|0x1.0bfbed148ef7ep-447|protein SAWADEE HOMEODOMAIN HOMOLOG 2 [Asparagus officinalis]_x0001_XP_020263724.1 protein SAWADEE HOMEODOMAIN HOMOLOG 2 [Asparagus officinalis]_x0001_ONK73761.1 uncharacterized protein A4U43_C04F35000 [Asparagus officinalis]	-	cellular_component:nucleus(GO:0005634);;cellular_component:nucleus(GO:0005634)	Q8RWJ7|SHH2_ARATH|-66.3|Protein SAWADEE HOMEODOMAIN HOMOLOG 2 OS=Arabidopsis thaliana GN=SHH2 PE=2 SV=1	4641.GSMUA_Achr4P18450_001|-123.9|ENOG410Y94E|K|HOX	PF16719.4|SAWADEE|7e-41|SAWADEE domain
c2902/f1p19/4644	XP_010663584.1|0x1.62b42650954bdp-185|PREDICTED: aspartyl protease APCB1 [Vitis vinifera]	-	cellular_component:membrane(GO:0016020);;cellular_component:membrane(GO:0016020);;cellular_component:integral component of membrane(GO:0016021);;molecular_function:hydrolase activity(GO:0016787);;molecular_function:aspartic-type endopeptidase activity(GO:0004190);;biological_process:proteolysis(GO:0006508);;molecular_function:peptidase activity(GO:0008233)	Q9M9A8|APCB1_ARATH|-47.4|Aspartyl protease APCB1 OS=Arabidopsis thaliana GN=APCB1 PE=1 SV=1	29760.VIT_17s0000g03880.t01|-57.5|ENOG410XNV7|O|aspartic	-
c39441/f1p2/974	XP_008785445.1|0x1.3622d7c91751p-281|PREDICTED: steroid 5-alpha-reductase DET2 [Phoenix dactylifera]_x0001_XP_008785446.1 PREDICTED: steroid 5-alpha-reductase DET2 [Phoenix dactylifera]	pda:103704073|-85.3|K09591|DET2; steroid 5-alpha-reductase [EC:1.3.1.22]|ko00905|Brassinosteroid biosynthesis;;	cellular_component:membrane(GO:0016020);;cellular_component:integral component of membrane(GO:0016021);;biological_process:brassinosteroid biosynthetic process(GO:0016132);;biological_process:brassinosteroid biosynthetic process(GO:0016132);;molecular_function:oxidoreductase activity(GO:0016491);;molecular_function:cholestenone 5-alpha-reductase activity(GO:0047751);;molecular_function:progestero…	Q38944|DET2_ARATH|-77.1|Steroid 5-alpha-reductase DET2 OS=Arabidopsis thaliana GN=DET2 PE=1 SV=2	4641.GSMUA_Achr4P11670_001|-83.6|ENOG410XS6P|S|3-oxo-5-alpha-steroid 4-dehydrogenase activity	PF02544.15|Steroid_dh|2e-45|3-oxo-5-alpha-steroid 4-dehydrogenase
c17821/f1p79/2267	PKA65826.1|0x1.875b532f0c623p-794|Asparagine--tRNA ligase, chloroplastic/mitochondrial [Apostasia shenzhenica]	pda:103720894|-238.7|K01876|DARS, aspS; aspartyl-tRNA synthetase [EC:6.1.1.12]|ko00970|Aminoacyl-tRNA biosynthesis;;	molecular_function:aspartate-tRNA ligase activity(GO:0004815);;molecular_function:ATP binding(GO:0005524);;cellular_component:cytoplasm(GO:0005737);;cellular_component:endoplasmic reticulum(GO:0005783);;cellular_component:endoplasmic reticulum(GO:0005783);;cellular_component:cytosol(GO:0005829);;biological_process:translation(GO:0006412);;molecular_function:ligase activity(GO:0016874);;molecular_…	Q9M084|SYDC2_ARATH|-201.1|Aspartate--tRNA ligase 2, cytoplasmic OS=Arabidopsis thaliana GN=IBI1 PE=1 SV=1	29760.VIT_04s0008g03010.t01|-229.0|COG0017|J|asparaginyl-tRNA synthetase	PF00152.19|tRNA-synt_2|2.7e-75|tRNA synthetases class II (D, K and N)
c4161/f1p130/1841	ART33472.1|0x1.10bbabec554acp-269|transcription factor WRKY33 [Lilium regale]	osa:4327518|-76.0|K13424|WRKY33; WRKY transcription factor 33|ko04626|Plant-pathogen interaction;;	cellular_component:nucleus(GO:0005634);;biological_process:transcription, DNA-templated(GO:0006351);;biological_process:regulation of transcription, DNA-templated(GO:0006355);;biological_process:response to abscisic acid(GO:0009737);;biological_process:abscisic acid-activated signaling pathway(GO:0009738);;biological_process:response to gibberellin(GO:0009739);;biological_process:gibberellic acid…	Q6IEQ7|WRK24_ORYSJ|-78.4|WRKY transcription factor WRKY24 OS=Oryza sativa subsp. japonica GN=WRKY24 PE=2 SV=1	39946.BGIOSGA004722-PA|-77.2|ENOG4112BTF|K|WRKY transcription factor	-
c14808/f1p138/2044	AKI87756.1|0x1.03c6414ece29bp-820|alliinase, partial [Allium sativum]	-	molecular_function:alliin lyase activity(GO:0047654);;cellular_component:vacuole(GO:0005773);;cellular_component:vacuole(GO:0005773);;molecular_function:lyase activity(GO:0016829)	Q01594|ALLN1_ALLSA|-248.3|Alliin lyase 1 OS=Allium sativum PE=1 SV=1	29760.VIT_18s0157g00140.t01|-109.6|ENOG410XS9Z|S|tryptophan aminotransferase-related protein 4-like	PF04864.12|Alliinase_C|3.3e-154|Allinase
c6141/f1p14/2297	XP_020250048.1|0x1.fcbf11478884bp-874|uncharacterized protein LOC109827450 [Asparagus officinalis]	-	-	-	4533.OB01G15250.1|-228.3|ENOG410XR4T|S|spastic paraplegia 11 (autosomal recessive)	PF14649.5|Spatacsin_C|1.3e-78|Spatacsin C-terminus
c23276/f1p188/3591	XP_020256034.1|0x1.3b29e4cc58816p-843|cationic amino acid transporter 3, mitochondrial-like [Asparagus officinalis]_x0001_ONK74292.1 uncharacterized protein A4U43_C03F4750 [Asparagus officinalis]	-	cellular_component:membrane(GO:0016020);;cellular_component:integral component of membrane(GO:0016021);;cellular_component:vacuole(GO:0005773);;cellular_component:vacuolar membrane(GO:0005774);;biological_process:amino acid transport(GO:0006865)	Q9ASS7|CAAT2_ARATH|-163.8|Cationic amino acid transporter 2, vacuolar OS=Arabidopsis thaliana GN=CAT2 PE=1 SV=1	3711.Bra027723.1-P|-220.6|COG0531|E|amino acid	PF13520.5|AA_permease_2|6.3e-48|Amino acid permease
c30906/f1p17/2709	ONK55492.1|0x1.a7c08f31fba78p-610|uncharacterized protein A4U43_UnF2400 [Asparagus officinalis]	egu:105060394|-178.3|K05917|CYP51; sterol 14-demethylase [EC:1.14.13.70]|ko00100|Steroid biosynthesis;;	molecular_function:methyltransferase activity(GO:0008168);;biological_process:steroid metabolic process(GO:0008202);;molecular_function:sterol 14-demethylase activity(GO:0008398);;cellular_component:membrane(GO:0016020);;cellular_component:membrane(GO:0016020);;cellular_component:integral component of membrane(GO:0016021);;biological_process:sterol biosynthetic process(GO:0016126);;molecular_func…	P93846|CP51_SORBI|-178.2|Obtusifoliol 14-alpha demethylase OS=Sorghum bicolor GN=CYP51 PE=1 SV=1	4577.GRMZM5G899349_P01|-178.4|COG2124|Q|Cytochrome p450	PF00067.21|p450|1.3e-51|Cytochrome P450
c70896/f1p3/1466	XP_020595922.1|0x1.bda7fe0f3956dp-228|uncharacterized protein LOC110035927 [Phalaenopsis equestris]	-	-	-	4641.GSMUA_Achr10P16500_001|-62.3|ENOG410YSY6|S|Lipase (class 3)	-
c36412/f1p175/2755	PIA63800.1|0x1.fbe47b8f1bdbp-231|hypothetical protein AQUCO_00201257v1 [Aquilegia coerulea]	ppp:PHYPADRAFT_227764|-69.0|K02866|RP-L10e, RPL10; large subunit ribosomal protein L10e|ko03010|Ribosome;;	cellular_component:ribosome(GO:0005840);;cellular_component:intracellular ribonucleoprotein complex(GO:0030529)	Q9M5M7|RL10_EUPES|-69.8|60S ribosomal protein L10 OS=Euphorbia esula GN=RPL10 PE=2 SV=1	3218.PP1S447_11V6.1|-70.2|COG0197|J|Binds 23S rRNA and is also seen to make contacts with the A and possibly P site tRNAs (By similarity)	PF00252.17|Ribosomal_L16|6.1e-34|Ribosomal protein L16p/L10e
c22733/f1p40/3609	XP_022148448.1|0x1.c84b677be0d23p-67|telomere repeat-binding protein 5-like isoform X4 [Momordica charantia]	-	biological_process:transcription, DNA-templated(GO:0006351);;biological_process:regulation of transcription, DNA-templated(GO:0006355);;molecular_function:DNA binding(GO:0003677);;cellular_component:nucleus(GO:0005634);;cellular_component:nucleus(GO:0005634)	Q6R0E3|TRP5_ARATH|-21.5|Telomere repeat-binding protein 5 OS=Arabidopsis thaliana GN=TRP5 PE=1 SV=2	4641.GSMUA_Achr10P22620_001|-29.2|ENOG4111PQU|K|Telomere repeat-binding protein	-
c14835/f2p123/2732	XP_019704895.1|0x1.b709867b38aebp-878|PREDICTED: ubiquitin carboxyl-terminal hydrolase 12 isoform X3 [Elaeis guineensis]	-	molecular_function:cysteine-type peptidase activity(GO:0008234);;molecular_function:hydrolase activity(GO:0016787);;molecular_function:thiol-dependent ubiquitinyl hydrolase activity(GO:0036459);;molecular_function:protein binding(GO:0005515);;biological_process:proteolysis(GO:0006508);;molecular_function:peptidase activity(GO:0008233)	Q84WU2|UBP13_ARATH|-235.3|Ubiquitin carboxyl-terminal hydrolase 13 OS=Arabidopsis thaliana GN=UBP13 PE=1 SV=1	4555.Si021031m|-254.4|COG5077|O|ubiquitin carboxyl-terminal hydrolase	PF12436.7|USP7_ICP0_bdg|1.7e-77|ICP0-binding domain of Ubiquitin-specific protease 7
c36000/f1p13/2229	XP_020274638.1|0x1.0671a71402c53p-774|uncharacterized protein At1g04910-like [Asparagus officinalis]_x0001_ONK79370.1 uncharacterized protein A4U43_C01F5670 [Asparagus officinalis]	-	cellular_component:membrane(GO:0016020);;cellular_component:membrane(GO:0016020);;cellular_component:integral component of membrane(GO:0016021);;molecular_function:transferase activity(GO:0016740);;molecular_function:transferase activity, transferring glycosyl groups(GO:0016757);;biological_process:carbohydrate metabolic process(GO:0005975);;biological_process:fucose metabolic process(GO:0006004)…	Q4V398|OFT34_ARATH|-185.9|O-fucosyltransferase 34 OS=Arabidopsis thaliana GN=OFUT34 PE=2 SV=1	4641.GSMUA_Achr9P18530_001|-193.4|-|-|-	PF10250.8|O-FucT|1.1e-74|GDP-fucose protein O-fucosyltransferase
c16221/f1p14/2103	XP_020259930.1|0x1.1aa5b9fc03f6dp-167|WD repeat-containing protein 70 [Asparagus officinalis]_x0001_ONK70878.1 uncharacterized protein A4U43_C04F2460 [Asparagus officinalis]	-	-	-	4641.GSMUA_Achr5P20500_001|-50.6|ENOG410XP76|S|WD repeat domain 70	-
c1200/f1p23/4220	AQK50396.1|0x1.e3cde1edac9c1p-97|Putative SNF2-domain/RING finger domain/helicase domain protein [Zea mays]	-	molecular_function:protein binding(GO:0005515);;molecular_function:ATP binding(GO:0005524);;cellular_component:nucleus(GO:0005634);;cellular_component:nucleus(GO:0005634);;biological_process:transcription, DNA-templated(GO:0006351);;biological_process:regulation of transcription, DNA-templated(GO:0006355);;biological_process:covalent chromatin modification(GO:0016569);;molecular_function:hydrolas…	Q94BR5|CHR28_ARATH|-26.0|Helicase-like transcription factor CHR28 OS=Arabidopsis thaliana GN=CHR28 PE=1 SV=1	4538.ORGLA08G0041800.1|-34.5|ENOG410XPDU|L|Transcription termination factor, RNA polymerase II	-
c21800/f1p19/2667	XP_020252966.1|0x1.01aa2ba907351p-106|uncharacterized protein LOC109830192 isoform X2 [Asparagus officinalis]	-	-	-	29760.VIT_01s0026g00690.t01|-29.6|COG0328|L|ribonuclease H activity	-
c14902/f1p9/1049	BAT22736.1|0x1.a9453a0a3f81dp-141|Ran GTPase-activating protein [Allium cepa]_x0001_BAT22737.1 Ran GTPase-activating protein [Allium cepa]	mus:103970159|-29.1|K14319|RANGAP1; Ran GTPase-activating protein 1|ko03013|RNA transport;;	cellular_component:cytoplasm(GO:0005737);;cellular_component:spindle(GO:0005819);;cellular_component:cytoskeleton(GO:0005856);;cellular_component:phragmoplast(GO:0009524);;cellular_component:membrane(GO:0016020);;cellular_component:nuclear membrane(GO:0031965);;molecular_function:GTPase activator activity(GO:0005096);;cellular_component:nucleus(GO:0005634);;cellular_component:cytoplasm(GO:0005737)	Q9M651|RAGP2_ARATH|-25.9|RAN GTPase-activating protein 2 OS=Arabidopsis thaliana GN=RANGAP2 PE=1 SV=2	4641.GSMUA_Achr11P01660_001|-30.4|COG5238|U|RAN GTPase activating protein 1	-
c34764/f1p30/4269	ARJ62686.1|0x1.4b53ff7a7b647p-977|RNA polymerase beta (plastid) [Allium sativum]_x0001_ASR12330.1 DNA-directed RNA polymerase beta' chain (chloroplast) [Allium sativum]	egu:12079460|-272.2|K03046|rpoC; DNA-directed RNA polymerase subunit beta' [EC:2.7.7.6]|ko00230|Purine metabolism;;ko00240|Pyrimidine metabolism;;ko03020|RNA polymerase;;	cellular_component:chloroplast(GO:0009507);;cellular_component:plastid(GO:0009536);;molecular_function:transferase activity(GO:0016740);;molecular_function:nucleotidyltransferase activity(GO:0016779);;molecular_function:DNA-directed 5'-3' RNA polymerase activity(GO:0003899);;molecular_function:DNA-directed 5'-3' RNA polymerase activity(GO:0003899);;cellular_component:chloroplast(GO:0009507)	A9LYH6|RPOC1_ACOAM|-270.9|DNA-directed RNA polymerase subunit beta' OS=Acorus americanus GN=rpoC1 PE=3 SV=1	59689.fgenesh1_pm.C_scaffold_2000558|-260.9|COG0086|K|DNA-dependent RNA polymerase catalyzes the transcription of DNA into RNA using the four ribonucleoside triphosphates as substrates (By similarity)	PF04997.11|RNA_pol_Rpb1_1|1.2e-32|RNA polymerase Rpb1, domain 1
c238164/f1p4/1701	XP_008778848.1|0x1.7fefe09564994p-114|PREDICTED: uncharacterized protein LOC103698592 [Phoenix dactylifera]	pda:103698592|-35.0|K10666|RNF5; E3 ubiquitin-protein ligase RNF5 [EC:2.3.2.27]|ko04141|Protein processing in endoplasmic reticulum;;	-	-	4641.GSMUA_Achr1P23860_001|-35.3|ENOG4111IHV|O|Ring finger protein	-
c9502/f1p5/1978	XP_020256762.1|0x1.ddd939c8b7b85p-93|U3 small nucleolar RNA-associated protein 6 homolog [Asparagus officinalis]_x0001_ONK74945.1 uncharacterized protein A4U43_C03F11720 [Asparagus officinalis]	pda:103698328|-28.3|K14557|UTP6; U3 small nucleolar RNA-associated protein 6|ko03008|Ribosome biogenesis in eukaryotes;;	-	-	-	-
c116957/f1p8/1870	ONK68795.1|0x1.8e67dbc4f261ep-136|uncharacterized protein A4U43_C05F16110 [Asparagus officinalis]	-	-	-	4641.GSMUA_Achr4P09100_001|-45.5|ENOG410YWRW|S|NA	-
c5660/f1p29/3719	XP_013611399.1|0x1.1622ea47cd0c8p-862|PREDICTED: probable mediator of RNA polymerase II transcription subunit 37c [Brassica oleracea var. oleracea]	eus:EUTSA_v10020257mg|-260.2|K03283|HSPA1_8; heat shock 70kDa protein 1/8|ko04141|Protein processing in endoplasmic reticulum;;ko03040|Spliceosome;;ko04144|Endocytosis;;	cellular_component:nucleus(GO:0005634);;cellular_component:cytoplasm(GO:0005737);;cellular_component:cytoplasm(GO:0005737);;biological_process:transcription, DNA-templated(GO:0006351);;biological_process:regulation of transcription, DNA-templated(GO:0006355);;biological_process:response to heat(GO:0009408);;biological_process:protein ubiquitination(GO:0016567);;molecular_function:ubiquitin protei…	Q9LHA8|MD37C_ARATH|-262.5|Probable mediator of RNA polymerase II transcription subunit 37c OS=Arabidopsis thaliana GN=MED37C PE=1 SV=1	3711.Bra038734.1-P|-261.4|COG0443|O|Heat shock protein	PF00012.19|HSP70|1.1e-192|Hsp70 protein
c345933/f1p1/555	XP_020165791.1|0x1.7cc44cb24d044p-189|histone H2A-like [Aegilops tauschii subsp. tauschii]	-	cellular_component:nucleus(GO:0005634);;cellular_component:chromosome(GO:0005694);;cellular_component:chromosome(GO:0005694);;cellular_component:nucleosome(GO:0000786);;molecular_function:DNA binding(GO:0003677);;cellular_component:nucleus(GO:0005634)	Q94E96|H2A5_ORYSJ|-58.9|Probable histone H2A.5 OS=Oryza sativa subsp. japonica GN=Os01g0502700 PE=2 SV=1	15368.BRADI2G37327.1|-58.5|COG5262|B|histone h2a	-
c117242/f1p4/1614	OAY84609.1|0x1.21758741ca96ap-63|putative thylakoidal processing peptidase 2, chloroplastic [Ananas comosus]	pda:103723906|-19.5|K03100|lepB, TPP; signal peptidase I [EC:3.4.21.89]|ko03060|Protein export;;	-	-	-	-
c63607/f1p5/1860	XP_009392628.1|0x1.00b238dbeb766p-205|PREDICTED: quinolinate synthase, chloroplastic-like [Musa acuminata subsp. malaccensis]	mus:103978527|-62.5|K03517|nadA; quinolinate synthase [EC:2.5.1.72]|ko00760|Nicotinate and nicotinamide metabolism;;	cellular_component:plastid(GO:0009536);;molecular_function:transferase activity(GO:0016740);;biological_process:pyridine nucleotide biosynthetic process(GO:0019363);;molecular_function:metal ion binding(GO:0046872);;molecular_function:iron-sulfur cluster binding(GO:0051536);;molecular_function:4 iron, 4 sulfur cluster binding(GO:0051539);;biological_process:NAD biosynthetic process(GO:0009435);;c…	Q9FGS4|NADA_ARATH|-54.9|Quinolinate synthase, chloroplastic OS=Arabidopsis thaliana GN=QS PE=1 SV=1	4641.GSMUA_Achr3P17170_001|-63.7|COG0379|H|Catalyzes the condensation of iminoaspartate with dihydroxyacetone phosphate to form quinolinate (By similarity)	-
c175812/f3p8/1924	ABJ16394.1|0x1.2b1ab2ee68a6ap-660|3-hydroxy-3-methylglutaryl-coenzyme A reductase [Ligularia fischeri]	dosa:Os08t0512700-01|-190.5|K00021|HMGCR; hydroxymethylglutaryl-CoA reductase (NADPH) [EC:1.1.1.34]|ko00900|Terpenoid backbone biosynthesis;;	biological_process:isoprenoid biosynthetic process(GO:0008299);;cellular_component:membrane(GO:0016020);;cellular_component:integral component of membrane(GO:0016021);;molecular_function:oxidoreductase activity(GO:0016491);;biological_process:oxidation-reduction process(GO:0055114);;molecular_function:hydroxymethylglutaryl-CoA reductase (NADPH) activity(GO:0004420);;cellular_component:endoplasmic…	Q0DY59|HMDH1_ORYSJ|-178.2|3-hydroxy-3-methylglutaryl-coenzyme A reductase 1 OS=Oryza sativa subsp. japonica GN=HMG1 PE=2 SV=2	4533.OB09G21500.1|-191.4|COG1257|I|)-reductase	PF00368.17|HMG-CoA_red|5.5e-147|Hydroxymethylglutaryl-coenzyme A reductase
c21885/f1p26/3047	XP_020251397.1|0x1.57dc77b351df3p-439|uncharacterized protein LOC109828842 [Asparagus officinalis]_x0001_ONK81137.1 uncharacterized protein A4U43_C01F25690 [Asparagus officinalis]	-	-	-	4641.GSMUA_Achr6P05620_001|-122.2|ENOG410YE2A|S|Protein of unknown function (DUF616)	PF04765.12|DUF616|6.3e-97|Protein of unknown function (DUF616)
c24220/f1p31/2211	XP_017698790.1|0x1.0f74c1f417a6bp-248|PREDICTED: E4 SUMO-protein ligase PIAL2 isoform X4 [Phoenix dactylifera]	egu:105040788|-79.0|K04706|PIAS1; E3 SUMO-protein ligase PIAS1|ko04120|Ubiquitin mediated proteolysis;;	-	-	4577.GRMZM2G075582_P01|-75.8|ENOG410XQ2E|S|Protein inhibitor of activated STAT	-
c26265/f1p19/2488	XP_004963198.1|0x1.c3d49368b60d9p-430|GTPase LSG1-2 [Setaria italica]_x0001_KQL17238.1 hypothetical protein SETIT_021544mg [Setaria italica]	sita:101769459|-130.0|K14539|LSG1; large subunit GTPase 1 [EC:3.6.1.-]|ko03008|Ribosome biogenesis in eukaryotes;;	cellular_component:cytoplasm(GO:0005737);;molecular_function:hydrolase activity(GO:0016787);;molecular_function:nucleotide binding(GO:0000166);;molecular_function:GTP binding(GO:0005525);;cellular_component:cytoplasm(GO:0005737)	Q9SHS8|LSG11_ARATH|-101.4|GTPase LSG1-1 OS=Arabidopsis thaliana GN=LSG1-1 PE=1 SV=1	4555.Si021544m|-131.3|COG1161|S|Required for a late step of 50S ribosomal subunit assembly. Has GTPase activity (By similarity)	-
c59463/f1p3/1527	XP_020265584.1|0x1.49bac201502dp-271|CBS domain-containing protein CBSX1, chloroplastic [Asparagus officinalis]	-	cellular_component:chloroplast(GO:0009507);;cellular_component:chloroplast(GO:0009507);;cellular_component:plastid(GO:0009536)	O23193|CBSX1_ARATH|-74.4|CBS domain-containing protein CBSX1, chloroplastic OS=Arabidopsis thaliana GN=CBSX1 PE=1 SV=2	3694.POPTR_0007s10760.1|-77.5|ENOG4111TWY|S|(CBS) domain	-
c190224/f1p4/1631	1LK9_A|0x1.da8ab58c399fbp-547|Chain A, The Three-Dimensional Structure Of Alliinase From Garlic_x0001_1LK9_B Chain B, The Three-Dimensional Structure Of Alliinase From Garlic	-	molecular_function:alliin lyase activity(GO:0047654);;cellular_component:vacuole(GO:0005773);;cellular_component:vacuole(GO:0005773);;molecular_function:lyase activity(GO:0016829)	Q01594|ALLN1_ALLSA|-167.1|Alliin lyase 1 OS=Allium sativum PE=1 SV=1	4113.PGSC0003DMT400061386|-41.0|ENOG410XS9Z|S|tryptophan aminotransferase-related protein 4-like	PF04864.12|Alliinase_C|4.8e-130|Allinase
c151731/f1p26/1988	BAF93492.1|0x1.ea5b8154b5324p-642|putative cell wall invertase [Asparagus officinalis]	pda:103699266|-158.4|K01193|INV, sacA; beta-fructofuranosidase [EC:3.2.1.26]|ko00500|Starch and sucrose metabolism;;ko00052|Galactose metabolism;;	cellular_component:cell wall(GO:0005618);;cellular_component:cell wall(GO:0005618);;biological_process:metabolic process(GO:0008152);;molecular_function:hydrolase activity(GO:0016787);;molecular_function:hydrolase activity, acting on glycosyl bonds(GO:0016798);;cellular_component:apoplast(GO:0048046);;cellular_component:apoplast(GO:0048046);;molecular_function:beta-fructofuranosidase activity(GO:…	Q5JJV0|INV4_ORYSJ|-80.5|Beta-fructofuranosidase, insoluble isoenzyme 4 OS=Oryza sativa subsp. japonica GN=CIN4 PE=2 SV=1	4641.GSMUA_Achr4P29900_001|-153.5|COG1621|G|Hydrolase	PF00251.19|Glyco_hydro_32N|2e-97|Glycosyl hydrolases family 32 N-terminal domain
c15025/f1p382/3593	CAC83699.1|0x1.d9aec1dd9e502p-754|RNA-dependent RNA-polymerase [Garlic virus X]	-	-	-	-	PF01443.17|Viral_helicase1|7.2e-51|Viral (Superfamily 1) RNA helicase
c220032/f1p81/1503	BAA93051.1|0x1.b111c98fc854ap-240|cysteine synthase [Allium tuberosum]	sita:101756742|-66.0|K01738|cysK; cysteine synthase A [EC:2.5.1.47]|ko01200|Carbon metabolism;;ko01230|Biosynthesis of amino acids;;ko00270|Cysteine and methionine metabolism;;ko00920|Sulfur metabolism;;	biological_process:cellular amino acid biosynthetic process(GO:0008652);;molecular_function:transferase activity(GO:0016740);;biological_process:cysteine biosynthetic process(GO:0019344);;biological_process:cysteine biosynthetic process(GO:0019344);;molecular_function:cysteine synthase activity(GO:0004124);;cellular_component:cytoplasm(GO:0005737);;cellular_component:cytoplasm(GO:0005737)	P80608|CYSK_MAIZE|-67.9|Cysteine synthase OS=Zea mays PE=1 SV=2	4555.Si022552m|-67.2|COG0031|E|cysteine biosynthetic process from serine	PF00291.24|PALP|7.6e-30|Pyridoxal-phosphate dependent enzyme
c35797/f1p21/2481	NP_001141614.2|0x1.5c177b3dcc809p-77|uncharacterized LOC100273733 [Zea mays]_x0001_ACF86720.2 unknown [Zea mays]	-	-	-	4641.GSMUA_Achr1P26180_001|-55.7|ENOG4112ATJ|S|zinc finger CCCH domain-containing protein	-
c108540/f1p0/1352	CDY72092.1|0x1.18a533bbf89b3p-306|BnaCnng75920D [Brassica napus]_x0001_CDY22010.1 BnaA09g00390D [Brassica napus]	vvi:100244176|-83.3|K00789|metK; S-adenosylmethionine synthetase [EC:2.5.1.6]|ko01230|Biosynthesis of amino acids;;ko00270|Cysteine and methionine metabolism;;	cellular_component:cytoplasm(GO:0005737);;cellular_component:cytoplasm(GO:0005737);;biological_process:S-adenosylmethionine biosynthetic process(GO:0006556);;biological_process:one-carbon metabolic process(GO:0006730);;molecular_function:transferase activity(GO:0016740);;molecular_function:metal ion binding(GO:0046872);;molecular_function:nucleotide binding(GO:0000166);;molecular_function:methion…	A7NVX9|METK2_VITVI|-85.7|S-adenosylmethionine synthase 2 OS=Vitis vinifera GN=METK2 PE=3 SV=1	3711.Bra036311.1-P|-93.4|COG0192|H|Catalyzes the formation of S-adenosylmethionine from methionine and ATP	PF02773.15|S-AdoMet_synt_C|7.9e-62|S-adenosylmethionine synthetase, C-terminal domain
c1884/f1p151/2948	XP_001773604.1|0x1.6b9472d4fa78dp-187|predicted protein [Physcomitrella patens]_x0001_EDQ61642.1 predicted protein [Physcomitrella patens]	ppp:PHYPADRAFT_191598|-57.0|K02940|RP-L9e, RPL9; large subunit ribosomal protein L9e|ko03010|Ribosome;;	cellular_component:ribosome(GO:0005840);;cellular_component:intracellular ribonucleoprotein complex(GO:0030529)	P49209|RL91_ARATH|-58.7|60S ribosomal protein L9-1 OS=Arabidopsis thaliana GN=RPL9B PE=1 SV=3	3218.PP1S164_98V6.1|-58.4|COG0097|J|This protein binds to the 23S rRNA, and is important in its secondary structure. It is located near the subunit interface in the base of the L7 L12 stalk, and near the tRNA binding site of the peptidyltransferase center (By similarity)	-
c119236/f1p15/1548	XP_017216263.1|0x1.f42e4f464aab4p-100|PREDICTED: protein SRC2-like [Daucus carota subsp. sativus]_x0001_KZM87429.1 hypothetical protein DCAR_024563 [Daucus carota subsp. sativus]	-	-	-	3694.POPTR_0034s00240.1|-20.0|ENOG410YJ7V|S|C2 domain	-
c26887/f1p52/3768	XP_020265027.1|0x1.deacf807a9f5ap-685|ketol-acid reductoisomerase, chloroplastic-like [Asparagus officinalis]_x0001_ONK69869.1 uncharacterized protein A4U43_C05F27630 [Asparagus officinalis]	mus:103979685|-203.1|K00053|ilvC; ketol-acid reductoisomerase [EC:1.1.1.86]|ko00770|Pantothenate and CoA biosynthesis;;ko01210|2-Oxocarboxylic acid metabolism;;ko00290|Valine, leucine and isoleucine biosynthesis;;ko01230|Biosynthesis of amino acids;;	molecular_function:NADPH binding(GO:0070402);;biological_process:cellular amino acid biosynthetic process(GO:0008652);;biological_process:branched-chain amino acid biosynthetic process(GO:0009082);;biological_process:isoleucine biosynthetic process(GO:0009097);;biological_process:valine biosynthetic process(GO:0009099);;cellular_component:chloroplast(GO:0009507);;cellular_component:chloroplast(GO…	Q01292|ILV5_SPIOL|-203.7|Ketol-acid reductoisomerase, chloroplastic OS=Spinacia oleracea GN=AHRI PE=1 SV=1	4641.GSMUA_Achr3P32100_001|-204.3|COG0059|E|Alpha-keto-beta-hydroxylacyl reductoisomerase	PF01450.18|IlvC|8.3e-36|Acetohydroxy acid isomeroreductase, catalytic domain
c28236/f1p497/2223	AKI87756.1|0x1.f2f8950abab4dp-870|alliinase, partial [Allium sativum]	-	molecular_function:alliin lyase activity(GO:0047654);;cellular_component:vacuole(GO:0005773);;cellular_component:vacuole(GO:0005773);;molecular_function:lyase activity(GO:0016829)	Q01594|ALLN1_ALLSA|-263.1|Alliin lyase 1 OS=Allium sativum PE=1 SV=1	29760.VIT_18s0157g00140.t01|-114.0|ENOG410XS9Z|S|tryptophan aminotransferase-related protein 4-like	PF04864.12|Alliinase_C|7.2e-163|Allinase
c341125/f1p0/608	XP_020676341.1|0x1.4a91a3947ab8bp-183|uncharacterized protein LOC110095234 [Dendrobium catenatum]_x0001_PKU66369.1 hypothetical protein MA16_Dca009611 [Dendrobium catenatum]	-	-	-	4538.ORGLA03G0228600.1|-54.5|COG1611|S|decarboxylase	-
c5621/f1p18/2427	XP_020256303.1|0x1.81d02775eebdap-965|LOW QUALITY PROTEIN: receptor-like protein kinase HAIKU2 [Asparagus officinalis]	-	cellular_component:membrane(GO:0016020);;cellular_component:membrane(GO:0016020);;cellular_component:integral component of membrane(GO:0016021);;molecular_function:kinase activity(GO:0016301);;biological_process:phosphorylation(GO:0016310);;molecular_function:transferase activity(GO:0016740);;molecular_function:nucleotide binding(GO:0000166);;molecular_function:protein serine/threonine kinase act…	Q9LJM4|IKU2_ARATH|-106.1|Receptor-like protein kinase HAIKU2 OS=Arabidopsis thaliana GN=IKU2 PE=1 SV=1	3694.POPTR_0009s08540.1|-234.3|COG4886|S|leucine Rich Repeat	PF00069.24|Pkinase|1.9e-43|Protein kinase domain
c55732/f2p2/1185	XP_020248525.1|0x1.732bd6c44bd3cp-214|uncharacterized protein LOC109825998 [Asparagus officinalis]_x0001_XP_020248526.1 uncharacterized protein LOC109825998 [Asparagus officinalis]	mus:103972486|-58.2|K02935|RP-L7, MRPL12, rplL; large subunit ribosomal protein L7/L12|ko03010|Ribosome;;	-	-	4641.GSMUA_Achr11P26390_001|-59.4|COG0222|J|Seems to be the binding site for several of the factors involved in protein synthesis and appears to be essential for accurate translation (By similarity)	-
c23916/f1p5/1162	XP_020260814.1|0x1.caee6a7aac742p-232|LOW QUALITY PROTEIN: probable xyloglucan endotransglucosylase/hydrolase protein 30 [Asparagus officinalis]	-	biological_process:metabolic process(GO:0008152);;molecular_function:transferase activity(GO:0016740);;molecular_function:xyloglucan:xyloglucosyl transferase activity(GO:0016762);;molecular_function:hydrolase activity(GO:0016787);;molecular_function:hydrolase activity, acting on glycosyl bonds(GO:0016798);;cellular_component:apoplast(GO:0048046);;cellular_component:apoplast(GO:0048046);;biologica…	Q38908|XTH30_ARATH|-61.5|Probable xyloglucan endotransglucosylase/hydrolase protein 30 OS=Arabidopsis thaliana GN=XTH30 PE=2 SV=2	4641.GSMUA_Achr11P17890_001|-68.9|ENOG4111G24|G|xyloglucan endotransglucosylase hydrolase protein	PF00722.20|Glyco_hydro_16|2.2e-36|Glycosyl hydrolases family 16
c229313/f1p9/1499	XP_010918416.2|0x1.3fc2d4a3bd7cdp-457|PREDICTED: F-box/LRR-repeat protein 4 [Elaeis guineensis]	-	-	-	4641.GSMUA_Achr5P19410_001|-131.5|ENOG410XQ54|S|F-box and leucine-rich repeat protein	-
c266458/f1p7/1794	XP_010909269.1|0x1.5a49c6140aecep-175|PREDICTED: probable polygalacturonase [Elaeis guineensis]	-	-	-	15368.BRADI1G53430.1|-49.0|COG5434|M|Glycoside hydrolase family 28	-
c18610/f6p13/1689	AIZ68178.1|0x1.6f2d158b5f7a1p-527|E3 ubiquitin-protein ligase synoviolin-like protein [Ornithogalum longebracteatum]	sbi:SORBI_10g011070|-143.8|K10601|SYVN1, HRD1; E3 ubiquitin-protein ligase synoviolin [EC:2.3.2.27]|ko04120|Ubiquitin mediated proteolysis;;ko04141|Protein processing in endoplasmic reticulum;;	cellular_component:integral component of membrane(GO:0016021);;biological_process:protein ubiquitination(GO:0016567);;molecular_function:transferase activity(GO:0016740);;molecular_function:metal ion binding(GO:0046872);;cellular_component:endoplasmic reticulum(GO:0005783);;cellular_component:endoplasmic reticulum membrane(GO:0005789);;cellular_component:membrane(GO:0016020)	Q6NPT7|HRD1B_ARATH|-136.0|ERAD-associated E3 ubiquitin-protein ligase HRD1B OS=Arabidopsis thaliana GN=HRD1B PE=2 SV=1	4558.Sb10g011070.1|-145.1|COG5243|O|zinc ion binding	-
c34570/f1p40/3393	XP_020084641.1|0x1.3905663b8f295p-240|protein REVEILLE 6-like isoform X1 [Ananas comosus]	-	biological_process:transcription, DNA-templated(GO:0006351);;biological_process:regulation of transcription, DNA-templated(GO:0006355);;molecular_function:DNA binding(GO:0003677);;cellular_component:nucleus(GO:0005634);;cellular_component:nucleus(GO:0005634)	Q8H0W3|RVE6_ARATH|-47.2|Protein REVEILLE 6 OS=Arabidopsis thaliana GN=RVE6 PE=2 SV=1	3847.GLYMA16G29740.1|-51.7|COG5269|K|Transcription factor	-
c145642/f1p2/1205	XP_010695260.1|0x1.b38f369cfc386p-433|PREDICTED: alpha-1,4-glucan-protein synthase [UDP-forming] 2 [Beta vulgaris subsp. vulgaris]_x0001_KMS97832.1 hypothetical protein BVRB_5g123920 [Beta vulgaris subsp. vulgaris]	bvg:104907929|-130.9|K13379|RGP, UTM; reversibly glycosylated polypeptide / UDP-arabinopyranose mutase [EC:2.4.1.- 5.4.99.30]|ko00520|Amino sugar and nucleotide sugar metabolism;;	cellular_component:Golgi apparatus(GO:0005794);;molecular_function:isomerase activity(GO:0016853);;molecular_function:intramolecular transferase activity(GO:0016866);;molecular_function:UDP-arabinopyranose mutase activity(GO:0052691);;biological_process:cell wall organization(GO:0071555);;molecular_function:protein binding(GO:0005515);;molecular_function:protein binding(GO:0005515);;cellular_comp…	Q8H8T0|RGP1_ORYSJ|-131.8|UDP-arabinopyranose mutase 1 OS=Oryza sativa subsp. japonica GN=UAM1 PE=1 SV=1	4513.MLOC_77094.1|-132.0|ENOG411144T|O|reversibly glycosylated polypeptide	PF03214.12|RGP|2.6e-121|Reversibly glycosylated polypeptide
c89002/f2p28/2011	XP_020215049.1|0x1.d893e02d9558fp-105|folylpolyglutamate synthase-like isoform X3 [Cajanus cajan]	vvi:100262456|-64.4|K01930|FPGS; folylpolyglutamate synthase [EC:6.3.2.17]|ko00790|Folate biosynthesis;;	cellular_component:mitochondrion(GO:0005739);;cellular_component:mitochondrial inner membrane(GO:0005743);;cellular_component:mitochondrial inner membrane(GO:0005743);;cellular_component:mitochondrial matrix(GO:0005759);;biological_process:one-carbon metabolic process(GO:0006730);;cellular_component:membrane(GO:0016020);;molecular_function:ligase activity(GO:0016874);;molecular_function:metal ion…	F4J2K2|FPGS2_ARATH|-31.7|Folylpolyglutamate synthase OS=Arabidopsis thaliana GN=FPGS2 PE=1 SV=1	29760.VIT_08s0007g05910.t01|-65.7|COG0708|L|Exodeoxyribonuclease III	-
c77051/f3p8/978	XP_020263806.1|0x1.0e53c42841bf8p-299|probable peroxygenase 3 isoform X1 [Asparagus officinalis]_x0001_ONK70812.1 uncharacterized protein A4U43_C04F1790 [Asparagus officinalis]	zma:100216957|-85.4|K17991|PXG; peroxygenase [EC:1.11.2.3]|ko00073|Cutin, suberine and wax biosynthesis;;	cellular_component:membrane(GO:0016020);;molecular_function:oxidoreductase activity(GO:0016491);;cellular_component:organelle membrane(GO:0031090);;cellular_component:intracellular membrane-bounded organelle(GO:0043231);;molecular_function:metal ion binding(GO:0046872);;biological_process:oxidation-reduction process(GO:0055114);;molecular_function:plant seed peroxidase activity(GO:1990137);;cellu…	Q9SQ57|PXG_SESIN|-80.7|Peroxygenase OS=Sesamum indicum GN=SOP1 PE=1 SV=1	4513.MLOC_5179.2|-87.4|ENOG4111R51|S|Calcium-binding peroxygenase involved in the degradation of storage lipid in oil bodies. May be involved in the interaction between oil bodies and vacuoles during seed germination and in the oxylipin signaling pathways and plant defense responses. Can catalyze sulfoxidation of thiobenzamide, hydroxylation of aniline	PF05042.12|Caleosin|1.7e-76|Caleosin related protein
c27037/f1p83/2153	XP_009417594.1|0x1.6b527f6d5f8eep-158|PREDICTED: homeobox-leucine zipper protein HOX4-like [Musa acuminata subsp. malaccensis]_x0001_XP_009417595.1 PREDICTED: homeobox-leucine zipper protein HOX4-like [Musa acuminata subsp. malaccensis]_x0001_XP_018686914.1 PREDICTED: homeobox-leucine zipper protein HOX4-like [Musa acuminata subsp. malaccensis]	-	cellular_component:nucleus(GO:0005634);;biological_process:transcription, DNA-templated(GO:0006351);;biological_process:regulation of transcription, DNA-templated(GO:0006355);;molecular_function:DNA binding(GO:0003677);;molecular_function:DNA binding(GO:0003677);;cellular_component:nucleus(GO:0005634)	Q6Z248|HOX20_ORYSJ|-44.0|Homeobox-leucine zipper protein HOX20 OS=Oryza sativa subsp. japonica GN=HOX20 PE=2 SV=1	4641.GSMUA_Achr3P06620_001|-50.4|ENOG410Z2UE|K|homeobox-leucine zipper protein	-
c20904/f3p36/2330	OAY72647.1|0x1.20863053b6db5p-269|Acyl-coenzyme A oxidase 3, peroxisomal [Ananas comosus]	egu:105040970|-81.0|K00232|E1.3.3.6, ACOX1, ACOX3; acyl-CoA oxidase [EC:1.3.3.6]|ko00592|alpha-Linolenic acid metabolism;;ko00071|Fatty acid degradation;;ko04146|Peroxisome;;ko01040|Biosynthesis of unsaturated fatty acids;;ko01212|Fatty acid metabolism;;	biological_process:lipid metabolic process(GO:0006629);;biological_process:fatty acid metabolic process(GO:0006631);;molecular_function:oxidoreductase activity(GO:0016491);;biological_process:fatty acid beta-oxidation using acyl-CoA oxidase(GO:0033540);;biological_process:oxidation-reduction process(GO:0055114);;molecular_function:acyl-CoA oxidase activity(GO:0003997);;cellular_component:peroxiso…	P0CZ23|ACOX3_ARATH|-69.3|Acyl-coenzyme A oxidase 3, peroxisomal OS=Arabidopsis thaliana GN=ACX3 PE=1 SV=1	4641.GSMUA_Achr6P05860_001|-79.9|COG1960|I|acyl-CoA dehydrogenase	-
c5129/f1p146/2699	ONK70099.1|0x1.97a178c5a2d3fp-394|uncharacterized protein A4U43_C05F30250 [Asparagus officinalis]	-	cellular_component:membrane(GO:0016020);;cellular_component:integral component of membrane(GO:0016021);;molecular_function:protein binding(GO:0005515);;cellular_component:plasma membrane(GO:0005886);;cellular_component:plasma membrane(GO:0005886)	Q6ZBF6|BP131_ORYSJ|-89.7|Proton pump-interactor BIP131 OS=Oryza sativa subsp. japonica GN=BIP131 PE=1 SV=1	4641.GSMUA_Achr6P21610_001|-97.2|ENOG4111QP9|S|proton pump interactor	-
c22620/f1p9/2678	AQK39202.1|0x1.4e48f0d8030a6p-135|hypothetical protein ZEAMMB73_Zm00001d023367 [Zea mays]	-	-	-	4555.Si009404m|-42.8|ENOG410YBAK|S|expressed protein	-
c24660/f1p6/2340	XP_020244980.1|0x1.75f31ddfbcc68p-550|1,4-alpha-glucan-branching enzyme 1, chloroplastic/amyloplastic-like isoform X2 [Asparagus officinalis]	bvg:104898464|-163.0|K00700|GBE1, glgB; 1,4-alpha-glucan branching enzyme [EC:2.4.1.18]|ko00500|Starch and sucrose metabolism;;	cellular_component:chloroplast(GO:0009507);;cellular_component:chloroplast(GO:0009507);;cellular_component:plastid(GO:0009536);;molecular_function:transferase activity(GO:0016740);;molecular_function:transferase activity, transferring glycosyl groups(GO:0016757);;biological_process:starch biosynthetic process(GO:0019252);;biological_process:starch biosynthetic process(GO:0019252);;molecular_funct…	Q08047|GLGB_MAIZE|-161.2|1,4-alpha-glucan-branching enzyme 2, chloroplastic/amyloplastic OS=Zea mays GN=SBE1 PE=1 SV=1	15368.BRADI5G09170.1|-161.4|COG0296|G|Catalyzes the formation of the alpha-1,6-glucosidic linkages in glycogen by scission of a 1,4-alpha-linked oligosaccharide from growing alpha-1,4-glucan chains and the subsequent attachment of the oligosaccharide to the alpha-1,6 position (By similarity)	-
c22910/f1p30/1528	XP_020258042.1|0x1.22134d5a90ca3p-256|60S ribosomal protein L13a-4 [Asparagus officinalis]_x0001_ONK76337.1 uncharacterized protein A4U43_C03F26540 [Asparagus officinalis]	bdi:100845636|-77.7|K02872|RP-L13Ae, RPL13A; large subunit ribosomal protein L13Ae|ko03010|Ribosome;;	cellular_component:ribosome(GO:0005840);;cellular_component:intracellular ribonucleoprotein complex(GO:0030529)	Q9FKC0|R13A4_ARATH|-76.7|60S ribosomal protein L13a-4 OS=Arabidopsis thaliana GN=RPL13AD PE=2 SV=1	15368.BRADI1G08260.1|-78.8|COG0102|J|This protein is one of the early assembly proteins of the 50S ribosomal subunit, although it is not seen to bind rRNA by itself. It is important during the early stages of 50S assembly (By similarity)	-
c15394/f1p40/3172	XP_020266953.1|0x1.a7786f68d34cep-143|LOW QUALITY PROTEIN: uncharacterized protein LOC109842496 [Asparagus officinalis]	-	-	-	4641.GSMUA_Achr8P25530_001|-23.5|ENOG410YGJ3|S|DNA-binding bromodomain-containing protein	-
c120106/f1p101/1322	XP_008794109.1|0x1.782434facb9a2p-251|PREDICTED: NADP-dependent malic enzyme-like isoform X2 [Phoenix dactylifera]	pda:103710233|-76.3|K00029|E1.1.1.40, maeB; malate dehydrogenase (oxaloacetate-decarboxylating)(NADP+) [EC:1.1.1.40]|ko00710|Carbon fixation in photosynthetic organisms;;ko01200|Carbon metabolism;;ko00620|Pyruvate metabolism;;	molecular_function:oxaloacetate decarboxylase activity(GO:0008948);;molecular_function:oxidoreductase activity(GO:0016491);;molecular_function:metal ion binding(GO:0046872);;biological_process:oxidation-reduction process(GO:0055114);;molecular_function:malate dehydrogenase (decarboxylating) (NADP+) activity(GO:0004473);;cellular_component:cytoplasm(GO:0005737);;cellular_component:cytoplasm(GO:000…	P51615|MAOX_VITVI|-77.8|NADP-dependent malic enzyme OS=Vitis vinifera PE=2 SV=1	4641.GSMUA_Achr7P13690_001|-76.8|COG0281|C|malic enzyme	PF03949.14|Malic_M|1.3e-53|Malic enzyme, NAD binding domain
c145603/f1p21/1755	XP_020088234.1|0x1.71ad6a51c0fc8p-570|probable tRNA N6-adenosine threonylcarbamoyltransferase [Ananas comosus]_x0001_XP_020088235.1 probable tRNA N6-adenosine threonylcarbamoyltransferase [Ananas comosus]	-	-	-	4641.GSMUA_Achr7P10790_001|-173.4|COG0533|O|Required for the formation of a threonylcarbamoyl group on adenosine at position 37 (t(6)A37) in tRNAs that read codons beginning with adenine (By similarity)	PF00814.24|Peptidase_M22|3.5e-89|Glycoprotease family
c1612/f1p6/4914	ONK56898.1|0x1.c100f4c28c42ep-274|uncharacterized protein A4U43_C10F14420 [Asparagus officinalis]	-	cellular_component:mitochondrion(GO:0005739);;cellular_component:mitochondrion(GO:0005739)	P0C896|PP209_ARATH|-59.1|Pentatricopeptide repeat-containing protein At3g02650, mitochondrial OS=Arabidopsis thaliana GN=At3g02650 PE=2 SV=1	4641.GSMUA_Achr7P02880_001|-74.1|ENOG410Z7Z7|S|Pentatricopeptide repeat-containing protein	-
c274461/f1p1/1354	XP_020252359.1|0x1.01ec9f3d3a384p-468|protein trichome birefringence-like 1 [Asparagus officinalis]	-	cellular_component:membrane(GO:0016020);;cellular_component:membrane(GO:0016020);;cellular_component:integral component of membrane(GO:0016021)	F4IH21|TBL33_ARATH|-120.4|Protein trichome birefringence-like 33 OS=Arabidopsis thaliana GN=TBL33 PE=2 SV=1	4641.GSMUA_AchrUn_randomP21100_001|-131.6|ENOG410ZJIP|S|leaf senescence related protein	PF13839.5|PC-Esterase|6e-91|GDSL/SGNH-like Acyl-Esterase family found in Pmr5 and Cas1p
c226875/f1p7/1770	XP_009760138.1|0x1.09875ce83b96cp-284|PREDICTED: uncharacterized protein LOC104212540 [Nicotiana sylvestris]	-	-	-	-	-
c18968/f1p46/1954	AKR15675.1|0x1.bd1ac21490084p-400|coat protein [Garlic virus X]_x0001_AKR15677.1 coat protein [Garlic virus X]_x0001_AKR15678.1 coat protein [Garlic virus X]_x0001_AKR15679.1 coat protein [Garlic virus X]_x0001_AKR15680.1 coat protein [Garlic virus X]_x0001_AKR15682.1 coat protein [Garlic virus X]_x0001_ASY93298.1 coat protein [Garlic virus X]_x0001_ASY93300.1 coat protein [Garlic virus X]_x0001_…	-	-	-	-	PF00286.19|Flexi_CP|1.2e-45|Viral coat protein
c21921/f1p48/3287	PKA56290.1|0x1.078f26a45931p-310|BTB/POZ domain-containing protein POB1 [Apostasia shenzhenica]	-	biological_process:protein ubiquitination(GO:0016567)	Q9FPW6|POB1_ARATH|-89.7|BTB/POZ domain-containing protein POB1 OS=Arabidopsis thaliana GN=POB1 PE=1 SV=2	29760.VIT_02s0025g00880.t01|-89.7|ENOG410YD15|S|BTB POZ domain-containing protein	-
c3219/f1p29/2716	AEC12422.1|0x1.70a8df99a2a74p-866|polyprotein [Onion yellow dwarf virus]	-	-	-	-	PF00767.17|Poty_coat|4.5e-91|Potyvirus coat protein
c20833/f1p23/1789	PKA49361.1|0x1.cb0187c794ebp-387|26S protease regulatory subunit S10B like B [Apostasia shenzhenica]	-	biological_process:response to cold(GO:0009409);;biological_process:response to water deprivation(GO:0009414);;biological_process:response to salt stress(GO:0009651);;biological_process:response to abscisic acid(GO:0009737);;cellular_component:membrane(GO:0016020);;cellular_component:integral component of membrane(GO:0016021);;molecular_function:hydrolase activity(GO:0016787);;molecular_function:…	Q9FLD5|ASD_ARATH|-105.8|AAA-ATPase ASD, mitochondrial OS=Arabidopsis thaliana GN=AATP1 PE=1 SV=1	4113.PGSC0003DMT400003558|-108.1|COG0465|O|Acts as a processive, ATP-dependent zinc metallopeptidase for both cytoplasmic and membrane proteins. Plays a role in the quality control of integral membrane proteins (By similarity)	-
c174666/f2p12/1540	XP_020272729.1|0x1.3de20d42e128fp-601|ACT domain-containing protein ACR9-like [Asparagus officinalis]	-	-	O80644|ACR9_ARATH|-71.6|ACT domain-containing protein ACR9 OS=Arabidopsis thaliana GN=ACR9 PE=2 SV=1	4641.GSMUA_Achr8P20880_001|-171.5|ENOG410YUMM|S|ACT domain containing protein, expressed	-
c25169/f1p2/1237	XP_022887760.1|0x1.2c0f5a7b21fp-169|basic endochitinase-like [Olea europaea var. sylvestris]	egu:105059691|-50.8|K20547|CHIB; basic endochitinase B [EC:3.2.1.14]|ko00520|Amino sugar and nucleotide sugar metabolism;;	biological_process:carbohydrate metabolic process(GO:0005975);;biological_process:chitin catabolic process(GO:0006032);;biological_process:defense response(GO:0006952);;molecular_function:chitin binding(GO:0008061);;biological_process:metabolic process(GO:0008152);;molecular_function:hydrolase activity(GO:0016787);;molecular_function:hydrolase activity, acting on glycosyl bonds(GO:0016798);;biolo…	Q42993|CHI1_ORYSJ|-50.9|Chitinase 1 OS=Oryza sativa subsp. japonica GN=Cht1 PE=2 SV=1	4641.GSMUA_Achr3P26900_001|-51.3|COG3979|G|chitinase	PF00182.18|Glyco_hydro_19|3.6e-59|Chitinase class I
c303428/f1p35/1059	XP_020275797.1|0x1.093e2001da8ddp-286|protein BTR1-like [Asparagus officinalis]	-	molecular_function:RNA binding(GO:0003723);;cellular_component:cytoplasm(GO:0005737);;cellular_component:cytoplasm(GO:0005737)	Q9LZ82|BTR1_ARATH|-34.5|Protein BTR1 OS=Arabidopsis thaliana GN=BTR1 PE=1 SV=1	4558.Sb04g037690.1|-80.1|ENOG410XRZD|S|Neuro-oncological ventral antigen	-
c89202/f1p32/1223	AKR15681.1|0x1.214a29dcf0865p-329|coat protein [Garlic virus X]	-	-	-	-	PF00286.19|Flexi_CP|8.7e-45|Viral coat protein
c2084/f1p10/4177	XP_020261909.1|0x1.74ff37f6a2c09p-676|ankyrin repeat and zinc finger domain-containing protein 1 [Asparagus officinalis]_x0001_ONK73065.1 uncharacterized protein A4U43_C04F26780 [Asparagus officinalis]	-	-	-	4641.GSMUA_Achr4P30510_001|-51.1|ENOG410XQAG|S|Ankyrin repeat and zinc finger domain containing 1	-
c187634/f2p12/1586	XP_020250563.1|0x1.1c622f357ca7bp-529|3-isopropylmalate dehydrogenase 2, chloroplastic-like [Asparagus officinalis]_x0001_ONK54997.1 uncharacterized protein A4U43_UnF8790 [Asparagus officinalis]	mus:103988546|-157.0|K00052|leuB, IMDH; 3-isopropylmalate dehydrogenase [EC:1.1.1.85]|ko01230|Biosynthesis of amino acids;;ko00660|C5-Branched dibasic acid metabolism;;ko01210|2-Oxocarboxylic acid metabolism;;ko00290|Valine, leucine and isoleucine biosynthesis;;	biological_process:leucine biosynthetic process(GO:0009098);;biological_process:leucine biosynthetic process(GO:0009098);;cellular_component:chloroplast(GO:0009507);;cellular_component:chloroplast(GO:0009507);;cellular_component:plastid(GO:0009536);;molecular_function:oxidoreductase activity(GO:0016491);;molecular_function:metal ion binding(GO:0046872);;biological_process:oxidation-reduction proc…	P29102|LEU3_BRANA|-151.3|3-isopropylmalate dehydrogenase, chloroplastic OS=Brassica napus PE=2 SV=1	4641.GSMUA_Achr6P19960_001|-158.3|ENOG410XQ2U|S|WD repeat domain 26	PF00180.19|Iso_dh|3.9e-123|Isocitrate/isopropylmalate dehydrogenase
c23351/f1p19/2235	ONK78694.1|0x1.ac6e5ee3d193ep-136|uncharacterized protein A4U43_C02F21460 [Asparagus officinalis]	-	-	-	39947.LOC_Os12g36670.1|-36.4|ENOG410XQ54|S|F-box and leucine-rich repeat protein	-
c222915/f1p43/1715	XP_008806655.1|0x1.83b801288554bp-414|PREDICTED: ALG-2 interacting protein X-like [Phoenix dactylifera]	pda:103719274|-125.3|K12200|PDCD6IP, ALIX, RIM20; programmed cell death 6-interacting protein|ko04144|Endocytosis;;	biological_process:vacuole organization(GO:0007033);;molecular_function:protein binding(GO:0005515);;biological_process:vacuole organization(GO:0007033);;molecular_function:protein binding(GO:0005515);;biological_process:protein transport(GO:0015031);;molecular_function:protein binding(GO:0005515);;cellular_component:cytoplasm(GO:0005737);;cellular_component:cytoplasm(GO:0005737);;cellular_compon…	F4HXZ1|BRO1_ARATH|-106.8|Vacuolar-sorting protein BRO1 OS=Arabidopsis thaliana GN=BRO1 PE=1 SV=1	4555.Si034208m|-120.5|ENOG410XQX6|S|Rhophilin, Rho GTPase binding protein	PF13949.5|ALIX_LYPXL_bnd|5.5e-40|ALIX V-shaped domain binding to HIV
c33916/f1p47/2461	KGO67947.1|0x1.a91e109ede68ap-198|hypothetical protein PITC_029160 [Penicillium italicum]	-	-	-	4533.OB04G17350.1|-29.9|-|-|-	-
c284324/f2p4/798	XP_012078203.1|0x1.53aac42eed16ap-114|ethylene-responsive transcription factor ERF014 [Jatropha curcas]_x0001_KDP32781.1 hypothetical protein JCGZ_12073 [Jatropha curcas]	-	biological_process:transcription, DNA-templated(GO:0006351);;biological_process:regulation of transcription, DNA-templated(GO:0006355);;biological_process:ethylene-activated signaling pathway(GO:0009873);;molecular_function:DNA binding(GO:0003677);;cellular_component:nucleus(GO:0005634);;cellular_component:nucleus(GO:0005634)	Q9LPE8|ERF14_ARATH|-34.0|Ethylene-responsive transcription factor ERF014 OS=Arabidopsis thaliana GN=ERF014 PE=2 SV=1	3711.Bra036022.1-P|-33.3|ENOG410YX49|K|Transcription factor	-
c236735/f1p12/1772	XP_020261101.1|0x1.00ec781af319dp-895|glucose-6-phosphate 1-dehydrogenase, chloroplastic-like isoform X2 [Asparagus officinalis]	egu:105049718|-266.2|K00036|G6PD, zwf; glucose-6-phosphate 1-dehydrogenase [EC:1.1.1.49 1.1.1.363]|ko01200|Carbon metabolism;;ko00480|Glutathione metabolism;;ko00030|Pentose phosphate pathway;;	biological_process:pentose-phosphate shunt(GO:0006098);;cellular_component:chloroplast(GO:0009507);;cellular_component:chloroplast(GO:0009507);;cellular_component:plastid(GO:0009536);;molecular_function:oxidoreductase activity(GO:0016491);;biological_process:oxidation-reduction process(GO:0055114);;molecular_function:glucose-6-phosphate dehydrogenase activity(GO:0004345);;biological_process:carbo…	Q43793|G6PDC_TOBAC|-257.6|Glucose-6-phosphate 1-dehydrogenase, chloroplastic OS=Nicotiana tabacum PE=2 SV=1	4558.Sb06g003160.1|-266.6|COG0364|G|Glucose-6-phosphate 1-dehydrogenase	PF02781.15|G6PD_C|9.2e-112|Glucose-6-phosphate dehydrogenase, C-terminal domain
c27123/f1p233/2655	Q01594.1|0x1.f13f278673d54p-308|RecName: Full=Alliin lyase 1; Short=Alliinase-1; AltName: Full=Cysteine sulphoxide lyase 1; Flags: Precursor_x0001_CAA78268.1 precursor alliinase [Allium sativum]	-	molecular_function:alliin lyase activity(GO:0047654);;cellular_component:vacuole(GO:0005773);;cellular_component:vacuole(GO:0005773);;molecular_function:lyase activity(GO:0016829)	Q01594|ALLN1_ALLSA|-95.6|Alliin lyase 1 OS=Allium sativum PE=1 SV=1	29760.VIT_18s0157g00140.t01|-42.0|ENOG410XS9Z|S|tryptophan aminotransferase-related protein 4-like	PF04864.12|Alliinase_C|3.3e-78|Allinase
c11065/f1p14/1159	XP_010919050.1|0x1.9e387eda905a1p-250|PREDICTED: UMP-CMP kinase [Elaeis guineensis]	egu:105043268|-75.8|K13800|CMPK1, UMPK; UMP-CMP kinase [EC:2.7.4.- 2.7.4.14]|ko00240|Pyrimidine metabolism;;	cellular_component:nucleus(GO:0005634);;cellular_component:nucleus(GO:0005634);;cellular_component:cytoplasm(GO:0005737);;cellular_component:cytoplasm(GO:0005737);;biological_process:pyrimidine nucleotide biosynthetic process(GO:0006221);;molecular_function:kinase activity(GO:0016301);;biological_process:phosphorylation(GO:0016310);;molecular_function:transferase activity(GO:0016740);;molecular_f…	Q6NMK6|KCY2_ARATH|-72.7|Probable UMP-CMP kinase 2 OS=Arabidopsis thaliana GN=UMK2 PE=2 SV=1	4641.GSMUA_Achr4P18070_001|-72.3|COG0563|F|Catalyzes the reversible transfer of the terminal phosphate group between ATP and AMP. Plays an important role in cellular energy homeostasis and in adenine nucleotide metabolism (By similarity)	PF00406.21|ADK|3.2e-45|Adenylate kinase
c27644/f1p3/1842	XP_020252155.1|0x1.21faee1ecc42fp-489|glycerol-3-phosphate dehydrogenase [NAD(+)]-like [Asparagus officinalis]	pda:103696611|-146.6|K00006|GPD1; glycerol-3-phosphate dehydrogenase (NAD+) [EC:1.1.1.8]|ko00564|Glycerophospholipid metabolism;;	molecular_function:glycerol-3-phosphate dehydrogenase [NAD+] activity(GO:0004367);;molecular_function:oxidoreductase activity(GO:0016491);;biological_process:oxidation-reduction process(GO:0055114)	P52425|GPDA_CUPLA|-142.1|Glycerol-3-phosphate dehydrogenase [NAD(+)] OS=Cuphea lanceolata GN=GPDH PE=2 SV=1	29760.VIT_14s0219g00280.t01|-146.6|COG0240|C|glycerol-3-phosphate dehydrogenase	PF01210.22|NAD_Gly3P_dh_N|9.9e-47|NAD-dependent glycerol-3-phosphate dehydrogenase N-terminus
c264330/f1p3/1326	XP_020275005.1|0x1.60aaf41d6c03fp-504|nicotinate-nucleotide pyrophosphorylase [carboxylating], chloroplastic [Asparagus officinalis]_x0001_ONK65214.1 uncharacterized protein A4U43_C07F34850 [Asparagus officinalis]	mtr:MTR_1g030750|-148.0|K00767|nadC, QPRT; nicotinate-nucleotide pyrophosphorylase (carboxylating) [EC:2.4.2.19]|ko00760|Nicotinate and nicotinamide metabolism;;	cellular_component:chloroplast(GO:0009507);;cellular_component:plastid(GO:0009536);;molecular_function:transferase activity(GO:0016740);;molecular_function:transferase activity, transferring glycosyl groups(GO:0016757);;biological_process:pyridine nucleotide biosynthetic process(GO:0019363);;molecular_function:nicotinate-nucleotide diphosphorylase (carboxylating) activity(GO:0004514);;biological_…	Q9ZU32|NADC_ARATH|-142.9|Nicotinate-nucleotide pyrophosphorylase [carboxylating], chloroplastic OS=Arabidopsis thaliana GN=QPT PE=2 SV=2	4641.GSMUA_Achr4P11740_001|-147.2|COG0157|H|nicotinate-nucleotide diphosphorylase (carboxylating) activity	PF01729.18|QRPTase_C|4.2e-59|Quinolinate phosphoribosyl transferase, C-terminal domain
c11098/f1p14/1276	XP_009385970.1|0x1.28c70c4c4e9f3p-137|PREDICTED: transmembrane protein 120 homolog [Musa acuminata subsp. malaccensis]	-	-	-	4641.GSMUA_AchrUn_randomP05090_001|-43.4|ENOG410XT6G|S|Transmembrane protein 120B	-
c87418/f1p4/1374	AAK95657.1|0x1.316ae24a5ee32p-117|alliinase, partial [Allium chinense]	-	molecular_function:alliin lyase activity(GO:0047654);;cellular_component:vacuole(GO:0005773);;cellular_component:vacuole(GO:0005773);;molecular_function:lyase activity(GO:0016829)	Q01594|ALLN1_ALLSA|-36.9|Alliin lyase 1 OS=Allium sativum PE=1 SV=1	-	PF04864.12|Alliinase_C|5.8e-33|Allinase
c12965/f1p42/1981	XP_020243614.1|0x1.f5b6739f5d5fep-705|uncharacterized protein LOC109821869 isoform X1 [Asparagus officinalis]	-	-	-	4533.OB06G35550.1|-195.5|ENOG41101A9|S|Protein of unknown function (DUF616)	PF04765.12|DUF616|1.7e-127|Protein of unknown function (DUF616)
c30597/f1p2/1193	XP_003576766.1|0x1.532d9ee7c42c5p-158|PREDICTED: protein STAY-GREEN, chloroplastic-like [Brachypodium distachyon]_x0001_KQJ91169.1 hypothetical protein BRADI_4g36060 [Brachypodium distachyon]	-	cellular_component:membrane(GO:0016020);;cellular_component:chloroplast membrane(GO:0031969);;cellular_component:chloroplast(GO:0009507);;cellular_component:plastid(GO:0009536);;cellular_component:chloroplast stroma(GO:0009570)	Q652K1|SGR_ORYSJ|-49.4|Protein STAY-GREEN, chloroplastic OS=Oryza sativa subsp. japonica GN=SGR PE=1 SV=1	15368.BRADI4G36060.1|-49.6|ENOG4111UAI|S|Senescence-inducible chloroplast stay-green protein	PF12638.6|Staygreen|1.7e-33|Staygreen protein
c194572/f1p15/1856	XP_020273407.1|0x1.79bd369f906e5p-583|SNF2 domain-containing protein CLASSY 1-like [Asparagus officinalis]	-	cellular_component:nucleus(GO:0005634);;cellular_component:nucleoplasm(GO:0005654);;cellular_component:nucleolus(GO:0005730);;molecular_function:hydrolase activity(GO:0016787);;molecular_function:nucleotide binding(GO:0000166);;molecular_function:helicase activity(GO:0004386);;molecular_function:ATP binding(GO:0005524)	Q9M297|CLSY1_ARATH|-26.1|SNF2 domain-containing protein CLASSY 1 OS=Arabidopsis thaliana GN=CLSY1 PE=1 SV=1	39946.BGIOSGA026441-PA|-135.9|COG0553|L|helicase	-
c89232/f1p12/1963	XP_019708341.1|0x1.66d7d24f2a3p-248|PREDICTED: E3 ubiquitin-protein ligase HERC2 isoform X4 [Elaeis guineensis]	-	molecular_function:phosphatidylinositol binding(GO:0035091);;molecular_function:metal ion binding(GO:0046872);;molecular_function:phosphatidic acid binding(GO:0070300);;molecular_function:guanyl-nucleotide exchange factor activity(GO:0005085);;molecular_function:lipid binding(GO:0008289);;molecular_function:Rab guanyl-nucleotide exchange factor activity(GO:0017112)	Q947D2|PRAF1_ARATH|-27.5|PH, RCC1 and FYVE domains-containing protein 1 OS=Arabidopsis thaliana GN=PRAF1 PE=1 SV=1	4577.GRMZM2G402309_P01|-65.2|COG5184|DZ|regulator of chromosome condensation	PF08381.10|BRX|7.8e-30|Transcription factor regulating root and shoot growth via Pin3
c12523/f2p3/1375	XP_008798412.1|0x1.417cc1efc2d4cp-446|PREDICTED: UV-B-induced protein At3g17800, chloroplastic-like [Phoenix dactylifera]	-	biological_process:response to wounding(GO:0009611);;biological_process:response to ozone(GO:0010193);;biological_process:response to UV-B(GO:0010224);;cellular_component:chloroplast(GO:0009507);;cellular_component:chloroplast(GO:0009507);;cellular_component:plastid(GO:0009536)	Q9LVJ0|UVB31_ARATH|-23.6|UV-B-induced protein At3g17800, chloroplastic OS=Arabidopsis thaliana GN=At3g17800 PE=2 SV=1	4513.MLOC_74226.3|-114.8|ENOG410YDXB|S|Protein of unknown function (DUF760)	-
c121488/f1p614/1230	KZM80319.1|0x1.1362dca9340e1p-64|hypothetical protein DCAR_031801 [Daucus carota subsp. sativus]_x0001_KZM87143.1 hypothetical protein DCAR_024277 [Daucus carota subsp. sativus]	-	-	-	4113.PGSC0003DMT400051118|-20.7|ENOG410Z9WV|S|NA	-
c4864/f1p8/4130	XP_010925726.1|0x1.445cc232ebf2bp-545|PREDICTED: plastidial pyruvate kinase 4, chloroplastic [Elaeis guineensis]_x0001_XP_010925727.1 PREDICTED: plastidial pyruvate kinase 4, chloroplastic [Elaeis guineensis]_x0001_XP_019707368.1 PREDICTED: plastidial pyruvate kinase 4, chloroplastic [Elaeis guineensis]_x0001_XP_019707369.1 PREDICTED: plastidial pyruvate kinase 4, chloroplastic [Elaeis guineensis]	egu:105048201|-164.8|K00873|PK, pyk; pyruvate kinase [EC:2.7.1.40]|ko01200|Carbon metabolism;;ko00620|Pyruvate metabolism;;ko00230|Purine metabolism;;ko01230|Biosynthesis of amino acids;;ko00010|Glycolysis / Gluconeogenesis;;	biological_process:glycolytic process(GO:0006096);;biological_process:glycolytic process(GO:0006096);;cellular_component:chloroplast(GO:0009507);;cellular_component:plastid(GO:0009536);;cellular_component:chloroplast stroma(GO:0009570);;molecular_function:kinase activity(GO:0016301);;biological_process:phosphorylation(GO:0016310);;molecular_function:transferase activity(GO:0016740);;molecular_fun…	Q9M3B6|PKP4_ARATH|-120.9|Plastidial pyruvate kinase 4, chloroplastic OS=Arabidopsis thaliana GN=PKP4 PE=2 SV=1	3694.POPTR_0012s01720.1|-125.7|COG0469|G|Pyruvate kinase	-
c152955/f3p13/1782	XP_020254711.1|0x1.b1975520d5836p-537|probable protein S-acyltransferase 4 isoform X1 [Asparagus officinalis]_x0001_ONK78542.1 uncharacterized protein A4U43_C02F19920 [Asparagus officinalis]	-	cellular_component:integral component of membrane(GO:0016021);;molecular_function:transferase activity(GO:0016740);;molecular_function:transferase activity, transferring acyl groups(GO:0016746);;molecular_function:protein-cysteine S-palmitoyltransferase activity(GO:0019706);;cellular_component:plasma membrane(GO:0005886);;cellular_component:plasma membrane(GO:0005886);;cellular_component:membrane…	Q0WQK2|ZDHC9_ARATH|-87.3|Probable protein S-acyltransferase 7 OS=Arabidopsis thaliana GN=PAT07 PE=1 SV=1	4641.GSMUA_Achr11P19950_001|-143.0|COG5273|S|Zinc finger, DHHC-type containing	PF01529.19|DHHC|6.9e-39|DHHC palmitoyltransferase
c59214/f1p20/1581	ONK62905.1|0x1.54cd4d37338bp-661|uncharacterized protein A4U43_C07F9340 [Asparagus officinalis]	-	-	-	4641.GSMUA_Achr5P21720_001|-189.5|COG5032|BDLTU|phosphatidylinositol kinase activity	-
c21147/f4p31/2581	XP_020247796.1|0x1.97dc8aa2a03f2p-221|monosaccharide-sensing protein 2-like [Asparagus officinalis]_x0001_XP_020247797.1 monosaccharide-sensing protein 2-like [Asparagus officinalis]_x0001_XP_020247798.1 monosaccharide-sensing protein 2-like [Asparagus officinalis]	-	cellular_component:integral component of membrane(GO:0016021);;biological_process:carbohydrate transport(GO:0008643);;cellular_component:membrane(GO:0016020);;cellular_component:membrane(GO:0016020)	Q8LPQ8|MSSP2_ARATH|-49.3|Monosaccharide-sensing protein 2 OS=Arabidopsis thaliana GN=MSSP2 PE=1 SV=2	4558.Sb04g008150.1|-59.0|ENOG410XNQK|G|Transporter	-
c339127/f1p0/659	XP_003621457.1|0x1.6cd09e119d713p-224|core histone H2A/H2B/H3/H4 [Medicago truncatula]_x0001_AES77675.1 core histone H2A/H2B/H3/H4 [Medicago truncatula]	-	cellular_component:nucleus(GO:0005634);;cellular_component:chromosome(GO:0005694);;cellular_component:chromosome(GO:0005694);;cellular_component:nucleosome(GO:0000786);;molecular_function:DNA binding(GO:0003677);;cellular_component:nucleus(GO:0005634)	P68429|H32_MEDSA|-70.6|Histone H3.2 OS=Medicago sativa GN=H3-1.1 PE=1 SV=2	3847.GLYMA15G03710.1|-69.5|COG2036|B|Core component of nucleosome. Nucleosomes wrap and compact DNA into chromatin, limiting DNA accessibility to the cellular machineries which require DNA as a template. Histones thereby play a central role in transcription regulation, DNA repair, DNA replication and chromosomal stability. DNA accessibility is regulated via a complex set of post-translational mod…	PF00125.23|Histone|7.6e-54|Core histone H2A/H2B/H3/H4
c17660/f1p162/3709	ONK81061.1|0x1.264a72ee38168p-501|uncharacterized protein A4U43_C01F24800 [Asparagus officinalis]	egu:105033979|-151.5|K14515|EBF1_2; EIN3-binding F-box protein|ko04075|Plant hormone signal transduction;;	biological_process:protein ubiquitination(GO:0016567);;cellular_component:nucleus(GO:0005634);;cellular_component:nucleus(GO:0005634);;biological_process:ethylene-activated signaling pathway(GO:0009873)	Q708Y0|EBF2_ARATH|-10.4|EIN3-binding F-box protein 2 OS=Arabidopsis thaliana GN=EBF2 PE=1 SV=1	4641.GSMUA_Achr6P05220_001|-145.5|ENOG410ZPKV|S|EIN3-binding F-box protein	-
c20966/f5p47/2687	XP_020260230.1|0x1.afd6c5c12e715p-849|signal recognition particle subunit SRP72-like [Asparagus officinalis]_x0001_ONK71155.1 uncharacterized protein A4U43_C04F5360 [Asparagus officinalis]	egu:105053006|-247.2|K03108|SRP72; signal recognition particle subunit SRP72|ko03060|Protein export;;	-	-	4641.GSMUA_Achr10P25310_001|-238.6|ENOG410XRWI|U|Signal-recognition-particle assembly has a crucial role in targeting secretory proteins to the rough endoplasmic reticulum membrane (By similarity)	-
c1931/f1p70/4014	XP_010929321.1|0x1.e1cf88803c2b1p-506|PREDICTED: coatomer subunit beta-1 [Elaeis guineensis]_x0001_XP_010929322.1 PREDICTED: coatomer subunit beta-1 [Elaeis guineensis]_x0001_XP_019707902.1 PREDICTED: coatomer subunit beta-1 [Elaeis guineensis]_x0001_XP_019707903.1 PREDICTED: coatomer subunit beta-1 [Elaeis guineensis]	-	cellular_component:Golgi apparatus(GO:0005794);;biological_process:protein transport(GO:0015031);;cellular_component:membrane(GO:0016020);;biological_process:vesicle-mediated transport(GO:0016192);;cellular_component:COPI-coated vesicle membrane(GO:0030663);;cellular_component:cytoplasmic vesicle(GO:0031410);;cellular_component:Golgi membrane(GO:0000139);;cellular_component:cytoplasm(GO:0005737);…	Q53PC7|COPB1_ORYSJ|-154.2|Coatomer subunit beta-1 OS=Oryza sativa subsp. japonica GN=Os11g0174000 PE=2 SV=1	4533.OB11G13770.1|-153.1|COG5096|U|The coatomer is a cytosolic protein complex that binds to dilysine motifs and reversibly associates with Golgi non- clathrin-coated vesicles, which further mediate biosynthetic protein transport from the ER, via the Golgi up to the trans Golgi network. Coatomer complex is required for budding from Golgi membranes, and is essential for the retrograde Golgi-to-ER …	PF07718.11|Coatamer_beta_C|1.7e-60|Coatomer beta C-terminal region
c117732/f1p8/1383	PKA55014.1|0x1.1318d546b2743p-88|Glutathione S-transferase T1 [Apostasia shenzhenica]	egu:105035281|-25.1|K00799|GST, gst; glutathione S-transferase [EC:2.5.1.18]|ko00480|Glutathione metabolism;;	cellular_component:nucleus(GO:0005634);;cellular_component:peroxisome(GO:0005777);;cellular_component:peroxisome(GO:0005777);;biological_process:response to toxic substance(GO:0009636);;molecular_function:oxidoreductase activity(GO:0016491);;molecular_function:transferase activity(GO:0016740);;biological_process:oxidation-reduction process(GO:0055114);;molecular_function:glutathione transferase a…	Q9ZRT5|GSTT1_ARATH|-23.0|Glutathione S-transferase T1 OS=Arabidopsis thaliana GN=GSTT1 PE=2 SV=1	4641.GSMUA_AchrUn_randomP06210_001|-25.9|COG0625|O|glutathione Stransferase	-
c2871/f1p270/4220	XP_020246723.1|0x1.89e481b110361p-956|ribonuclease TUDOR 2-like [Asparagus officinalis]	-	cellular_component:cytoplasm(GO:0005737);;cellular_component:cytoplasm(GO:0005737);;cellular_component:cytoplasm(GO:0005737);;cellular_component:endoplasmic reticulum(GO:0005783);;cellular_component:endoplasmic reticulum(GO:0005783);;biological_process:mRNA processing(GO:0006397);;biological_process:mRNA catabolic process(GO:0006402);;biological_process:positive regulation of gibberellin biosynth…	Q9FLT0|TSN2_ARATH|-247.3|Ribonuclease TUDOR 2 OS=Arabidopsis thaliana GN=TSN2 PE=1 SV=1	4641.GSMUA_Achr6P08280_001|-277.6|COG1525|L|nuclease	-
c6803/f1p112/2325	AFU35736.1|0x1.63e15194cd1dap-628|polyprotein [Onion yellow dwarf virus]	-	-	-	-	PF00680.19|RdRP_1|9.1e-52|RNA dependent RNA polymerase
c31520/f1p9/2637	XP_020241629.1|0x1.3e029b0dc9615p-238|phosphatidylinositol N-acetylglucosaminyltransferase subunit A isoform X1 [Asparagus officinalis]_x0001_XP_020241632.1 phosphatidylinositol N-acetylglucosaminyltransferase subunit A isoform X1 [Asparagus officinalis]	gra:105788966|-70.6|K03857|PIGA, GPI3; phosphatidylinositol glycan, class A [EC:2.4.1.198]|ko00563|Glycosylphosphatidylinositol(GPI)-anchor biosynthesis;;	biological_process:GPI anchor biosynthetic process(GO:0006506);;biological_process:pollen germination(GO:0009846);;biological_process:pollen tube growth(GO:0009860);;cellular_component:membrane(GO:0016020);;cellular_component:integral component of membrane(GO:0016021);;molecular_function:transferase activity(GO:0016740);;molecular_function:transferase activity, transferring glycosyl groups(GO:001…	Q94BX4|PIGA_ARATH|-69.7|Phosphatidylinositol N-acetylglucosaminyltransferase subunit A OS=Arabidopsis thaliana GN=PIGA PE=2 SV=1	4533.OB07G17020.1|-71.4|COG0438|M|Glycosyl transferase (Group 1	-
c90784/f1p40/2134	AFV61770.1|0x1.3a627dee72bbcp-417|40 kDa protein [Garlic virus X]	-	-	-	-	PF05549.10|Allexi_40kDa|3.4e-81|Allexivirus 40kDa protein
c33435/f1p146/3614	XP_020255803.1|0x1.020f9f50d755bp-750|26S proteasome non-ATPase regulatory subunit 1 homolog A-like [Asparagus officinalis]_x0001_ONK74144.1 uncharacterized protein A4U43_C03F3220 [Asparagus officinalis]	egu:105039349|-226.3|K03032|PSMD1, RPN2; 26S proteasome regulatory subunit N2|ko03050|Proteasome;;	cellular_component:proteasome complex(GO:0000502)	O48844|PSD1A_ARATH|-219.4|26S proteasome non-ATPase regulatory subunit 1 homolog A OS=Arabidopsis thaliana GN=RPN2A PE=1 SV=1	4641.GSMUA_Achr1P10550_001|-226.1|COG5116|O|26s proteasome	-
c36606/f1p61/3617	XP_020264454.1|0x1.f9702067f152ep-761|probable acyl-activating enzyme 17, peroxisomal [Asparagus officinalis]_x0001_ONK69440.1 uncharacterized protein A4U43_C05F22910 [Asparagus officinalis]	-	biological_process:fatty acid metabolic process(GO:0006631);;molecular_function:ligase activity(GO:0016874);;cellular_component:peroxisome(GO:0005777);;cellular_component:peroxisome(GO:0005777);;biological_process:lipid metabolic process(GO:0006629)	F4KBF3|AAE17_ARATH|-208.6|Probable acyl-activating enzyme 17, peroxisomal OS=Arabidopsis thaliana GN=AAE17 PE=2 SV=1	4641.GSMUA_Achr6P36160_001|-220.7|COG0365|I|Catalyzes the conversion of acetate into acetyl-CoA (AcCoA), an essential intermediate at the junction of anabolic and catabolic pathways. AcsA undergoes a two-step reaction. In the first half reaction, AcsA combines acetate with ATP to form acetyl-adenylate (AcAMP) intermediate. In the second half reaction, it can then transfer the acetyl group from Ac…	PF00501.27|AMP-binding|1e-36|AMP-binding enzyme
c18635/f6p11/1685	XP_010276375.1|0x1.ce07d1d5da32dp-684|PREDICTED: uncharacterized protein LOC104611142 [Nelumbo nucifera]	-	-	-	29760.VIT_06s0004g00410.t01|-201.0|ENOG410Z0AY|S|carboxyl-terminal peptidase	PF03080.14|Neprosin|4.1e-89|Neprosin
c194532/f1p27/1802	XP_008791566.1|0x1.a2c50be4089aep-507|PREDICTED: uncharacterized membrane protein At1g06890 [Phoenix dactylifera]	-	cellular_component:Golgi apparatus(GO:0005794);;biological_process:carbohydrate transport(GO:0008643);;molecular_function:antiporter activity(GO:0015297);;molecular_function:antiporter activity(GO:0015297);;cellular_component:membrane(GO:0016020);;cellular_component:integral component of membrane(GO:0016021);;cellular_component:Golgi membrane(GO:0000139);;cellular_component:endoplasmic reticulum(…	F4IHS9|UXT1_ARATH|-130.7|UDP-xylose transporter 1 OS=Arabidopsis thaliana GN=UXT1 PE=1 SV=1	4555.Si010529m|-148.4|ENOG410XP1S|S|solute carrier family 35 member	-
c184818/f1p11/1650	OMO61001.1|0x1.bad927f6fcea9p-109|Zinc finger, B-box [Corchorus capsularis]	-	cellular_component:nucleus(GO:0005634);;cellular_component:nucleus(GO:0005634);;molecular_function:metal ion binding(GO:0046872)	Q9C7E8|COL15_ARATH|-33.9|Zinc finger protein CONSTANS-LIKE 15 OS=Arabidopsis thaliana GN=COL15 PE=1 SV=1	4641.GSMUA_Achr11P08470_001|-37.5|ENOG410Y966|S|Zinc finger protein	-
c87604/f1p85/2140	XP_010930272.1|0x1.bd648ede369e1p-439|PREDICTED: shewanella-like protein phosphatase 2 [Elaeis guineensis]	-	molecular_function:hydrolase activity(GO:0016787);;molecular_function:phosphatase activity(GO:0016791);;molecular_function:manganese ion binding(GO:0030145);;molecular_function:metal ion binding(GO:0046872);;molecular_function:phosphoprotein phosphatase activity(GO:0004721);;cellular_component:cytoplasm(GO:0005737);;cellular_component:cytosol(GO:0005829)	Q944L7|SLP2_ARATH|-110.7|Shewanella-like protein phosphatase 2 OS=Arabidopsis thaliana GN=SLP2 PE=1 SV=1	4641.GSMUA_Achr3P19250_001|-128.8|COG0639|T|serine threonine-protein phosphatase	-
c107646/f1p20/1463	XP_020260479.1|0x1.e6e545d82eb6fp-244|LOW QUALITY PROTEIN: uncharacterized protein LOC109836857 [Asparagus officinalis]	-	-	-	4113.PGSC0003DMT400006809|-61.2|COG0438|M|Glycosyl transferase (Group 1	-
c38834/f1p0/2057	GAU26016.1|0x1.4adc4f7be6a08p-164|hypothetical protein TSUD_64040 [Trifolium subterraneum]	-	molecular_function:endonuclease activity(GO:0004519);;biological_process:DNA recombination(GO:0006310);;biological_process:proteolysis(GO:0006508);;molecular_function:peptidase activity(GO:0008233);;biological_process:DNA integration(GO:0015074);;molecular_function:transferase activity(GO:0016740);;molecular_function:hydrolase activity(GO:0016787);;molecular_function:metal ion binding(GO:0046872)…	Q94HW2|POLR1_ARATH|-47.1|Retrovirus-related Pol polyprotein from transposon RE1 OS=Arabidopsis thaliana GN=RE1 PE=2 SV=1	39947.LOC_Os05g49850.1|-50.1|COG2801|L|Retrotransposon protein	-
c67218/f1p0/1948	XP_020273291.1|0x1.0e65a66f9d547p-123|transcription factor PIF3-like [Asparagus officinalis]_x0001_ONK63029.1 uncharacterized protein A4U43_C07F10660 [Asparagus officinalis]	egu:105040114|-37.3|K12126|PIF3; phytochrome-interacting factor 3|ko04712|Circadian rhythm - plant;;ko04075|Plant hormone signal transduction;;	cellular_component:nucleus(GO:0005634);;biological_process:transcription, DNA-templated(GO:0006351);;biological_process:regulation of transcription, DNA-templated(GO:0006355);;biological_process:red, far-red light phototransduction(GO:0009585);;biological_process:red or far-red light signaling pathway(GO:0010017);;molecular_function:DNA binding(GO:0003677);;molecular_function:protein binding(GO:0…	O80536|PIF3_ARATH|-28.6|Transcription factor PIF3 OS=Arabidopsis thaliana GN=PIF3 PE=1 SV=1	29760.VIT_14s0060g00260.t01|-36.5|ENOG4111SYS|K|Transcription factor	-
c151395/f1p53/1554	ONK58566.1|0x1.6f1803bdfcdb5p-600|uncharacterized protein A4U43_C09F14390 [Asparagus officinalis]	zma:542483|-179.6|K00162|PDHB, pdhB; pyruvate dehydrogenase E1 component beta subunit [EC:1.2.4.1]|ko01200|Carbon metabolism;;ko00620|Pyruvate metabolism;;ko00020|Citrate cycle (TCA cycle);;ko00010|Glycolysis / Gluconeogenesis;;	biological_process:glycolytic process(GO:0006096);;molecular_function:oxidoreductase activity(GO:0016491);;biological_process:oxidation-reduction process(GO:0055114);;molecular_function:pyruvate dehydrogenase (acetyl-transferring) activity(GO:0004739);;cellular_component:mitochondrion(GO:0005739);;cellular_component:mitochondrial matrix(GO:0005759)	Q6Z1G7|ODPB1_ORYSJ|-178.1|Pyruvate dehydrogenase E1 component subunit beta-1, mitochondrial OS=Oryza sativa subsp. japonica GN=Os08g0536000 PE=2 SV=1	4641.GSMUA_Achr5P25000_001|-179.0|COG0022|C|Dehydrogenase, E1 component	PF02779.23|Transket_pyr|1.1e-46|Transketolase, pyrimidine binding domain
c154742/f1p1/1897	Q01594.1|0x1.b9a42f1dd42d5p-954|RecName: Full=Alliin lyase 1; Short=Alliinase-1; AltName: Full=Cysteine sulphoxide lyase 1; Flags: Precursor_x0001_CAA78268.1 precursor alliinase [Allium sativum]	-	molecular_function:alliin lyase activity(GO:0047654);;cellular_component:vacuole(GO:0005773);;cellular_component:vacuole(GO:0005773);;molecular_function:lyase activity(GO:0016829)	Q01594|ALLN1_ALLSA|-290.3|Alliin lyase 1 OS=Allium sativum PE=1 SV=1	29760.VIT_18s0157g00140.t01|-121.6|ENOG410XS9Z|S|tryptophan aminotransferase-related protein 4-like	PF04864.12|Alliinase_C|3.3e-173|Allinase
c8967/f1p32/1101	XP_020256856.1|0x1.5bc0b6f222aa7p-175|probable nucleoredoxin 2 isoform X3 [Asparagus officinalis]	-	-	-	15368.BRADI2G52317.1|-24.8|ENOG410ZIWC|O|nucleoredoxin-like	-
c57654/f1p8/1073	AKN63432.1|0x1.32a5fc062e561p-211|nuclear factor-Y [Allium sativum]	-	-	-	-	-
c269313/f1p9/1328	ADM87260.1|0x1.d42befe409128p-95|TCP transcription factor 11 [Solanum lycopersicum]	-	biological_process:transcription, DNA-templated(GO:0006351);;biological_process:regulation of transcription, DNA-templated(GO:0006355);;molecular_function:DNA binding(GO:0003677);;cellular_component:nucleus(GO:0005634);;cellular_component:nucleus(GO:0005634)	Q9C7G4|TCP22_ARATH|-28.5|Transcription factor TCP22 OS=Arabidopsis thaliana GN=TCP22 PE=2 SV=1	4081.Solyc01g103780.2.1|-29.7|ENOG410YBA4|K|Transcription factor	-
c44354/f1p4/1991	XP_010920488.1|0x1.a0be44c2972cap-109|PREDICTED: putative wall-associated receptor kinase-like 16 [Elaeis guineensis]	-	-	-	-	-
c14470/f1p9/2841	KYP38784.1|0x1.55df08cc57ad1p-220|Retrovirus-related Pol polyprotein from transposon TNT 1-94, partial [Cajanus cajan]	-	-	-	29760.VIT_07s0005g06030.t01|-54.8|ENOG410ZXEB|S|Integrase core domain	-
c227502/f1p6/1393	PKA66889.1|0x1.c06db4c1eca44p-138|hypothetical protein AXF42_Ash003546 [Apostasia shenzhenica]	-	-	-	3847.GLYMA07G06670.3|-41.2|ENOG410Y75A|S|NA	-
c80520/f1p110/1942	XP_020256981.1|0x1.4e3463caf4cffp-218|ethylene-responsive transcription factor 1-like [Asparagus officinalis]	-	cellular_component:nucleus(GO:0005634);;biological_process:transcription, DNA-templated(GO:0006351);;biological_process:regulation of transcription, DNA-templated(GO:0006355);;biological_process:ethylene-activated signaling pathway(GO:0009873);;molecular_function:DNA binding(GO:0003677);;molecular_function:protein binding(GO:0005515);;cellular_component:nucleus(GO:0005634)	Q9LUM4|RAP22_ARATH|-31.4|Ethylene-responsive transcription factor RAP2-2 OS=Arabidopsis thaliana GN=RAP2-2 PE=1 SV=2	29760.VIT_09s0002g00470.t01|-38.7|ENOG410YERP|K|Transcription factor	-
c303093/f5p5/966	XP_004307646.1|0x1.e8307c56ac165p-152|PREDICTED: GDSL esterase/lipase CPRD49-like [Fragaria vesca subsp. vesca]	-	biological_process:lipid catabolic process(GO:0016042);;molecular_function:hydrolase activity(GO:0016787);;cellular_component:extracellular region(GO:0005576);;cellular_component:extracellular region(GO:0005576);;biological_process:lipid metabolic process(GO:0006629)	Q9SRM5|CPR49_ARATH|-44.0|GDSL esterase/lipase CPRD49 OS=Arabidopsis thaliana GN=CPRD49 PE=2 SV=1	4641.GSMUA_Achr5P08670_001|-46.0|COG2755|E|lipolytic protein G-D-S-L family	-
c9202/f1p118/2569	XP_020265994.1|0x1.7033ba133722ap-229|T-complex protein 1 subunit beta [Asparagus officinalis]_x0001_ONK67526.1 uncharacterized protein A4U43_C05F960 [Asparagus officinalis]	-	cellular_component:cytoplasm(GO:0005737);;molecular_function:nucleotide binding(GO:0000166);;molecular_function:ATP binding(GO:0005524);;cellular_component:cytoplasm(GO:0005737)	Q940P8|TCPB_ARATH|-66.1|T-complex protein 1 subunit beta OS=Arabidopsis thaliana GN=CCT2 PE=1 SV=1	4641.GSMUA_Achr2P01800_001|-69.2|COG0459|O|Prevents misfolding and promotes the refolding and proper assembly of unfolded polypeptides generated under stress conditions (By similarity)	-
c46065/f1p49/1915	XP_008782032.1|0x1.78a264cd737a3p-422|PREDICTED: protein transport protein SEC31 homolog B-like [Phoenix dactylifera]	pda:103701661|-127.7|K14005|SEC31; protein transport protein SEC31|ko04141|Protein processing in endoplasmic reticulum;;	cellular_component:Golgi apparatus(GO:0005794);;biological_process:protein transport(GO:0015031);;biological_process:vesicle-mediated transport(GO:0016192);;cellular_component:endoplasmic reticulum(GO:0005783);;cellular_component:endoplasmic reticulum(GO:0005783);;cellular_component:Golgi apparatus(GO:0005794)	F4ICD9|SC31A_ARATH|-71.6|Protein transport protein SEC31 homolog A OS=Arabidopsis thaliana GN=SEC31A PE=1 SV=1	4081.Solyc01g088020.2.1|-111.1|ENOG410XQ1D|U|Component of the coat protein complex II (COPII) which promotes the formation of transport vesicles from the endoplasmic reticulum (ER). The coat has two main functions, the physical deformation of the endoplasmic reticulum membrane into vesicles and the selection of cargo molecules	-
c21879/f1p16/2556	Q01594.1|0x1.dc33c874798c2p-145|RecName: Full=Alliin lyase 1; Short=Alliinase-1; AltName: Full=Cysteine sulphoxide lyase 1; Flags: Precursor_x0001_CAA78268.1 precursor alliinase [Allium sativum]	-	molecular_function:alliin lyase activity(GO:0047654);;cellular_component:vacuole(GO:0005773);;cellular_component:vacuole(GO:0005773);;molecular_function:lyase activity(GO:0016829)	Q01594|ALLN1_ALLSA|-46.9|Alliin lyase 1 OS=Allium sativum PE=1 SV=1	39947.LOC_Os01g51980.1|-21.3|ENOG410XS9Z|S|tryptophan aminotransferase-related protein 4-like	PF04864.12|Alliinase_C|2.9e-35|Allinase
c15041/f1p444/2565	XP_010264924.1|0x1.0fdb5e92558aep-521|PREDICTED: heterogeneous nuclear ribonucleoprotein 1-like [Nelumbo nucifera]	nnu:104602803|-157.7|K14411|MSI; RNA-binding protein Musashi|ko03015|mRNA surveillance pathway;;	cellular_component:spliceosomal complex(GO:0005681);;cellular_component:cytoplasm(GO:0005737);;cellular_component:cytoplasm(GO:0005737);;biological_process:mRNA processing(GO:0006397);;biological_process:RNA splicing(GO:0008380);;cellular_component:intracellular ribonucleoprotein complex(GO:0030529);;biological_process:mRNA transport(GO:0051028);;molecular_function:RNA binding(GO:0003723);;cellul…	Q8W034|RNP1_ARATH|-128.1|Heterogeneous nuclear ribonucleoprotein 1 OS=Arabidopsis thaliana GN=RNP1 PE=1 SV=1	29760.VIT_05s0049g01660.t01|-149.7|ENOG410YA8Z|S|Rna-binding protein	-
c120156/f1p40/1990	ONK69791.1|0x1.3b051e577d5e2p-258|uncharacterized protein A4U43_C05F26770 [Asparagus officinalis]	pda:103710229|-75.8|K14376|PAP; poly(A) polymerase [EC:2.7.7.19]|ko03015|mRNA surveillance pathway;;	molecular_function:ATP binding(GO:0005524);;cellular_component:nucleus(GO:0005634);;cellular_component:nucleus(GO:0005634);;biological_process:mRNA processing(GO:0006397);;molecular_function:transferase activity(GO:0016740);;molecular_function:nucleotidyltransferase activity(GO:0016779);;molecular_function:metal ion binding(GO:0046872);;molecular_function:nucleotide binding(GO:0000166);;molecular…	Q8VYW1|PAPS4_ARATH|-75.6|Nuclear poly(A) polymerase 4 OS=Arabidopsis thaliana GN=PAPS4 PE=1 SV=1	4641.GSMUA_Achr9P16270_001|-76.1|COG5186|A|polyA polymerase	-
c21741/f1p0/1499	XP_009383093.1|0x1.fafa2dd1dd596p-75|PREDICTED: pectinesterase-like [Musa acuminata subsp. malaccensis]	egu:105057449|-23.5|K01051|E3.1.1.11; pectinesterase [EC:3.1.1.11]|ko00040|Pentose and glucuronate interconversions;;ko00500|Starch and sucrose metabolism;;	-	-	-	-
c216200/f1p14/1320	NP_001241241.1|0x1.2541bf2eaa088p-132|uncharacterized protein LOC100809400 [Glycine max]_x0001_ACU21503.1 unknown [Glycine max]_x0001_KHN46222.1 D-arabinose 1-dehydrogenase [Glycine soja]_x0001_KRH42023.1 hypothetical protein GLYMA_08G064100 [Glycine max]	gmx:100809400|-40.6|K17744|GalDH; L-galactose dehydrogenase [EC:1.1.1.316]|ko00053|Ascorbate and aldarate metabolism;;	biological_process:oxidation-reduction process(GO:0055114);;biological_process:carbohydrate metabolic process(GO:0005975);;biological_process:galactose metabolic process(GO:0006012);;molecular_function:oxidoreductase activity(GO:0016491)	O81884|GALDH_ARATH|-38.4|L-galactose dehydrogenase OS=Arabidopsis thaliana GN=LGALDH PE=1 SV=1	3847.GLYMA08G06840.1|-41.9|COG0667|C|Aldo keto reductase	-
c11846/f1p61/2538	XP_020265889.1|0x1.8d38cb5ebda24p-1022|coatomer subunit beta-1-like [Asparagus officinalis]_x0001_XP_020265890.1 coatomer subunit beta-1-like [Asparagus officinalis]	-	cellular_component:Golgi apparatus(GO:0005794);;biological_process:protein transport(GO:0015031);;cellular_component:membrane(GO:0016020);;biological_process:vesicle-mediated transport(GO:0016192);;cellular_component:COPI-coated vesicle membrane(GO:0030663);;cellular_component:cytoplasmic vesicle(GO:0031410);;cellular_component:Golgi membrane(GO:0000139);;cellular_component:cytoplasm(GO:0005737);…	Q53PC7|COPB1_ORYSJ|-283.2|Coatomer subunit beta-1 OS=Oryza sativa subsp. japonica GN=Os11g0174000 PE=2 SV=1	29760.VIT_04s0008g02320.t01|-302.4|COG5096|U|The coatomer is a cytosolic protein complex that binds to dilysine motifs and reversibly associates with Golgi non- clathrin-coated vesicles, which further mediate biosynthetic protein transport from the ER, via the Golgi up to the trans Golgi network. Coatomer complex is required for budding from Golgi membranes, and is essential for the retrograde Go…	PF07718.11|Coatamer_beta_C|1.9e-55|Coatomer beta C-terminal region
c831/f1p5/4481	XP_020268446.1|0x1.04fa79b9bf2f7p-532|uncharacterized protein LOC109843897 [Asparagus officinalis]	egu:105042391|-149.3|K05349|bglX; beta-glucosidase [EC:3.2.1.21]|ko00940|Phenylpropanoid biosynthesis;;ko00460|Cyanoamino acid metabolism;;ko00500|Starch and sucrose metabolism;;	-	-	3694.POPTR_0019s05340.1|-146.5|COG1472|G|hydrolase family 3	PF00933.20|Glyco_hydro_3|2.8e-67|Glycosyl hydrolase family 3 N terminal domain
c134589/f1p20/1410	XP_020701469.1|0x1.a2bd3774a305fp-196|nuclear transcription factor Y subunit A-10-like isoform X2 [Dendrobium catenatum]	-	biological_process:transcription, DNA-templated(GO:0006351);;biological_process:regulation of transcription, DNA-templated(GO:0006355);;molecular_function:DNA binding(GO:0003677);;cellular_component:nucleus(GO:0005634);;cellular_component:nucleus(GO:0005634)	Q93ZH2|NFYA3_ARATH|-23.6|Nuclear transcription factor Y subunit A-3 OS=Arabidopsis thaliana GN=NFYA3 PE=2 SV=2	15368.BRADI1G13680.1|-51.0|COG5224|K|Nuclear transcription factor Y	-
c32367/f1p23/2667	ONM16460.1|0x1.f6b86565f1966p-241|hypothetical protein ZEAMMB73_Zm00001d003222 [Zea mays]	-	molecular_function:ATP binding(GO:0005524);;molecular_function:RNA polymerase II carboxy-terminal domain kinase activity(GO:0008353);;molecular_function:kinase activity(GO:0016301);;biological_process:phosphorylation(GO:0016310);;molecular_function:transferase activity(GO:0016740);;molecular_function:nucleotide binding(GO:0000166);;molecular_function:protein serine/threonine kinase activity(GO:00…	A2XUW1|CDKG2_ORYSI|-78.0|Cyclin-dependent kinase G-2 OS=Oryza sativa subsp. indica GN=CDKG-2 PE=3 SV=1	4641.GSMUA_Achr5P25400_001|-85.2|ENOG410XQ50|T|Cyclin-dependent kinase	-
c10400/f1p7/2195	XP_020089607.1|0x1.5a0edc47d88b6p-101|U-box domain-containing protein 6-like isoform X1 [Ananas comosus]_x0001_XP_020089608.1 U-box domain-containing protein 6-like isoform X1 [Ananas comosus]_x0001_XP_020089609.1 U-box domain-containing protein 6-like isoform X1 [Ananas comosus]_x0001_OAY64093.1 U-box domain-containing protein 6 [Ananas comosus]	-	biological_process:protein ubiquitination(GO:0016567);;molecular_function:transferase activity(GO:0016740)	Q9C9A6|PUB10_ARATH|-21.1|U-box domain-containing protein 10 OS=Arabidopsis thaliana GN=PUB10 PE=2 SV=1	4641.GSMUA_Achr2P09640_001|-59.8|ENOG410YE2N|O|Ubox domain-containing protein	-
c121056/f1p3/1355	XP_020272894.1|0x1.54980e0b9ef42p-506|protein ROOT PRIMORDIUM DEFECTIVE 1 [Asparagus officinalis]_x0001_ONK63043.1 uncharacterized protein A4U43_C07F10810 [Asparagus officinalis]	-	-	-	4113.PGSC0003DMT400002491|-128.3|ENOG410YG1B|S|Plant organelle RNA recognition domain	PF11955.7|PORR|3.2e-102|Plant organelle RNA recognition domain
c217383/f1p6/1091	XP_020276779.1|0x1.f7edc18f95553p-137|serine/arginine-rich splicing factor SC35-like [Asparagus officinalis]	gmx:100804370|-40.2|K12891|SFRS2; splicing factor, arginine/serine-rich 2|ko03040|Spliceosome;;	-	-	3847.GLYMA05G24540.3|-41.4|ENOG4111NJ8|A|serine arginine-rich splicing factor	-
c7076/f1p60/1606	XP_020688207.1|0x1.95f08a04b2c61p-299|DEAD-box ATP-dependent RNA helicase 10 [Dendrobium catenatum]_x0001_PKU76796.1 DEAD-box ATP-dependent RNA helicase 10 [Dendrobium catenatum]	-	molecular_function:ATP binding(GO:0005524);;molecular_function:hydrolase activity(GO:0016787);;molecular_function:nucleotide binding(GO:0000166);;molecular_function:RNA binding(GO:0003723);;molecular_function:helicase activity(GO:0004386)	Q8GY84|RH10_ARATH|-83.4|DEAD-box ATP-dependent RNA helicase 10 OS=Arabidopsis thaliana GN=RH10 PE=2 SV=2	4641.GSMUA_Achr8P34380_001|-88.7|ENOG410XQU7|L|DEAD (Asp-Glu-Ala-Asp) box polypeptide	-
c36284/f1p289/2179	ANH58205.1|0x1.e93dfa4596613p-246|glutathione S-transferase [Dracaena cambodiana]	mus:103999064|-70.8|K00799|GST, gst; glutathione S-transferase [EC:2.5.1.18]|ko00480|Glutathione metabolism;;	molecular_function:glutathione transferase activity(GO:0004364);;biological_process:auxin-activated signaling pathway(GO:0009734);;molecular_function:transferase activity(GO:0016740)	Q03666|GSTX4_TOBAC|-68.5|Probable glutathione S-transferase OS=Nicotiana tabacum PE=2 SV=1	4641.GSMUA_Achr9P26040_001|-72.0|ENOG410XSIX|O|glutathione Stransferase	-
c45783/f2p3/1413	XP_020276885.1|0x1.c4d28eab5c795p-481|GDT1-like protein 2, chloroplastic [Asparagus officinalis]_x0001_ONK79581.1 uncharacterized protein A4U43_C01F7830 [Asparagus officinalis]	-	cellular_component:integral component of membrane(GO:0016021);;cellular_component:chloroplast membrane(GO:0031969);;cellular_component:chloroplast(GO:0009507);;cellular_component:plastid(GO:0009536);;cellular_component:membrane(GO:0016020)	Q9T0H9|PA71H_ARATH|-104.8|Protein PAM71-homolog, chloroplastic OS=Arabidopsis thaliana GN=PAM71-HL PE=1 SV=2	4641.GSMUA_Achr1P01210_001|-117.8|COG2119|S|transmembrane protein 165	-
c18891/f1p27/2322	AGG13261.1|0x1.86a789bc9e185p-159|32 kDa protein [Garlic virus X]	-	-	-	-	PF05549.10|Allexi_40kDa|1e-43|Allexivirus 40kDa protein
c1148/f1p387/3793	XP_020090520.1|0x1.4dd70fc6b77e5p-787|aldehyde dehydrogenase family 2 member B7, mitochondrial-like [Ananas comosus]_x0001_OAY65831.1 Aldehyde dehydrogenase family 2 member B7, mitochondrial [Ananas comosus]	fve:101311183|-235.7|K00128|ALDH; aldehyde dehydrogenase (NAD+) [EC:1.2.1.3]|ko00561|Glycerolipid metabolism;;ko00071|Fatty acid degradation;;ko00380|Tryptophan metabolism;;ko00310|Lysine degradation;;ko00040|Pentose and glucuronate interconversions;;ko00410|beta-Alanine metabolism;;ko00340|Histidine metabolism;;ko00620|Pyruvate metabolism;;ko00330|Arginine and proline metabolism;;ko00903|Limonen…	molecular_function:oxidoreductase activity(GO:0016491);;biological_process:oxidation-reduction process(GO:0055114);;molecular_function:aldehyde dehydrogenase (NAD) activity(GO:0004029);;cellular_component:mitochondrion(GO:0005739);;cellular_component:mitochondrial matrix(GO:0005759)	Q8S528|AL2B7_ARATH|-230.3|Aldehyde dehydrogenase family 2 member B7, mitochondrial OS=Arabidopsis thaliana GN=ALDH2B7 PE=1 SV=2	3847.GLYMA18G18910.1|-235.7|COG1012|C|Dehydrogenase	PF00171.21|Aldedh|1.9e-180|Aldehyde dehydrogenase family
c251555/f4p21/893	XP_020247615.1|0x1.23909ce95b089p-326|60S ribosomal protein L13-1-like isoform X1 [Asparagus officinalis]_x0001_XP_020247616.1 60S ribosomal protein L13-1-like isoform X2 [Asparagus officinalis]_x0001_ONK57197.1 uncharacterized protein A4U43_C10F17600 [Asparagus officinalis]	vra:106768937|-91.3|K02873|RP-L13e, RPL13; large subunit ribosomal protein L13e|ko03010|Ribosome;;	cellular_component:ribosome(GO:0005840);;cellular_component:intracellular ribonucleoprotein complex(GO:0030529)	P41129|RL132_BRANA|-89.1|60S ribosomal protein L13-2 OS=Brassica napus PE=2 SV=1	3847.GLYMA09G34760.5|-92.1|COG4352|J|cytoplasmic translation	PF01294.17|Ribosomal_L13e|5.4e-76|Ribosomal protein L13e
c7475/f1p18/1513	XP_020255902.1|0x1.8b4ce662baffbp-526|UDP-galactose/UDP-glucose transporter 3-like [Asparagus officinalis]_x0001_ONK74208.1 uncharacterized protein A4U43_C03F3910 [Asparagus officinalis]	-	cellular_component:endoplasmic reticulum membrane(GO:0005789);;cellular_component:Golgi apparatus(GO:0005794);;biological_process:carbohydrate transport(GO:0008643);;biological_process:embryo sac development(GO:0009553);;biological_process:pollen development(GO:0009555);;molecular_function:antiporter activity(GO:0015297);;cellular_component:membrane(GO:0016020);;cellular_component:integral compon…	Q9M9S6|UTR3_ARATH|-152.1|UDP-galactose/UDP-glucose transporter 3 OS=Arabidopsis thaliana GN=UTR3 PE=1 SV=1	3847.GLYMA01G05170.1|-151.4|COG0697|EG|membrane	PF08449.10|UAA|1e-77|UAA transporter family
c181684/f1p28/1733	XP_020262670.1|0x1.907291133fc72p-201|hsp70 nucleotide exchange factor FES1 [Asparagus officinalis]_x0001_ONK72142.1 uncharacterized protein A4U43_C04F16220 [Asparagus officinalis]	pda:103715360|-53.0|K14001|SIL1, SLS1; nucleotide exchange factor SIL1|ko04141|Protein processing in endoplasmic reticulum;;	-	-	4641.GSMUA_Achr11P20040_001|-54.2|ENOG410XSBC|S|Nucleotide exchange factor Fes1	-
c15591/f1p52/3401	XP_020274806.1|0x1.b63f8c1173ce9p-657|factor of DNA methylation 5-like [Asparagus officinalis]_x0001_XP_020274807.1 factor of DNA methylation 5-like [Asparagus officinalis]_x0001_XP_020274808.1 factor of DNA methylation 5-like [Asparagus officinalis]	-	biological_process:gene silencing by RNA(GO:0031047)	Q9LHB1|FDM3_ARATH|-25.2|Factor of DNA methylation 3 OS=Arabidopsis thaliana GN=FDM3 PE=4 SV=1	4641.GSMUA_Achr9P03340_001|-165.4|ENOG410YGHF|S|XH XS domain-containing protein	PF03469.13|XH|3.6e-51|XH domain
c58768/f1p9/2011	XP_020276241.1|0x1.e253151bb7cccp-273|CSC1-like protein ERD4 [Asparagus officinalis]_x0001_ONK65174.1 uncharacterized protein A4U43_C07F34450 [Asparagus officinalis]	-	cellular_component:membrane(GO:0016020);;cellular_component:integral component of membrane(GO:0016021);;cellular_component:chloroplast membrane(GO:0031969);;cellular_component:chloroplast membrane(GO:0031969);;biological_process:ion transport(GO:0006811);;cellular_component:chloroplast(GO:0009507);;cellular_component:plastid(GO:0009536)	A9LIW2|CSC1L_BRAJU|-68.8|CSC1-like protein ERD4 OS=Brassica juncea GN=ERD4 PE=3 SV=2	4558.Sb02g003010.1|-74.5|COG5594|S|transmembrane protein 63C	PF02714.14|RSN1_7TM|8.5e-39|Calcium-dependent channel, 7TM region, putative phosphate
c40392/f1p24/3369	PKA53052.1|0x1.6a8bcfc8ca034p-514|hypothetical protein AXF42_Ash002034 [Apostasia shenzhenica]	-	-	-	4641.GSMUA_AchrUn_randomP14680_001|-150.3|ENOG410Y9U1|S|NA	-
c112817/f1p11/1355	XP_010927376.1|0x1.a866c0264e1e1p-442|PREDICTED: putative UDP-sugar transporter DDB_G0278631 isoform X1 [Elaeis guineensis]	-	cellular_component:integral component of membrane(GO:0016021);;biological_process:carbohydrate transport(GO:0008643);;cellular_component:membrane(GO:0016020);;cellular_component:membrane(GO:0016020)	A8MRY9|NSTU3_ARATH|-120.9|Nucleotide-sugar uncharacterized transporter 3 OS=Arabidopsis thaliana GN=At4g32272 PE=2 SV=1	4641.GSMUA_Achr4P09910_001|-128.0|COG5070|U|Solute carrier family 35	-
c1018/f1p35/4232	XP_020692949.1|0x1.ba71d61339e9p-469|ETHYLENE INSENSITIVE 3-like 1 protein [Dendrobium catenatum]_x0001_PKU66470.1 Protein ETHYLENE INSENSITIVE 3 [Dendrobium catenatum]	mus:103987938|-138.2|K14514|EIN3; ethylene-insensitive protein 3|ko04075|Plant hormone signal transduction;;	biological_process:transcription, DNA-templated(GO:0006351);;biological_process:regulation of transcription, DNA-templated(GO:0006355);;biological_process:ethylene-activated signaling pathway(GO:0009873);;molecular_function:DNA binding(GO:0003677);;cellular_component:nucleus(GO:0005634);;cellular_component:nucleus(GO:0005634)	Q9SLH0|EIL1_ARATH|-126.7|ETHYLENE INSENSITIVE 3-like 1 protein OS=Arabidopsis thaliana GN=EIL1 PE=1 SV=1	4641.GSMUA_Achr6P15930_001|-135.2|ENOG4110EBS|K|protein ethylene insensitive	PF04873.12|EIN3|8.2e-129|Ethylene insensitive 3
c269921/f1p6/1483	XP_020241777.1|0x1.57d25e35d4fb3p-380|lysosomal Pro-X carboxypeptidase isoform X2 [Asparagus officinalis]	-	-	-	4641.GSMUA_Achr6P31720_001|-111.3|ENOG410Y38A|S|Lysosomal Pro-X	PF05577.11|Peptidase_S28|8e-46|Serine carboxypeptidase S28
c30044/f1p36/2895	XP_020273399.1|0x1.26673216af589p-680|dymeclin isoform X2 [Asparagus officinalis]_x0001_ONK65019.1 uncharacterized protein A4U43_C07F32630 [Asparagus officinalis]	-	-	-	4641.GSMUA_Achr2P17440_001|-188.6|ENOG410XP0J|S|dymeclin	PF09742.8|Dymeclin|2.6e-114|Dyggve-Melchior-Clausen syndrome protein
c147725/f1p30/1739	XP_020276866.1|0x1.00b7477447021p-116|receptor-like serine/threonine-protein kinase ALE2 isoform X2 [Asparagus officinalis]_x0001_XP_020276867.1 receptor-like serine/threonine-protein kinase ALE2 isoform X2 [Asparagus officinalis]_x0001_ONK59273.1 uncharacterized protein A4U43_C08F4760 [Asparagus officinalis]	-	-	-	4081.Solyc07g039340.2.1|-32.5|COG0515|T|Serine Threonine protein kinase	-
c181657/f1p155/1805	XP_020273211.1|0x1.6c2d120db5a76p-428|triosephosphate isomerase, cytosolic [Asparagus officinalis]_x0001_ONK62245.1 uncharacterized protein A4U43_C07F1860 [Asparagus officinalis]	sot:102587260|-124.6|K01803|TPI, tpiA; triosephosphate isomerase (TIM) [EC:5.3.1.1]|ko00710|Carbon fixation in photosynthetic organisms;;ko00562|Inositol phosphate metabolism;;ko01200|Carbon metabolism;;ko01230|Biosynthesis of amino acids;;ko00051|Fructose and mannose metabolism;;ko00010|Glycolysis / Gluconeogenesis;;	biological_process:gluconeogenesis(GO:0006094);;biological_process:gluconeogenesis(GO:0006094);;biological_process:glycolytic process(GO:0006096);;biological_process:glycolytic process(GO:0006096);;biological_process:pentose-phosphate shunt(GO:0006098);;molecular_function:isomerase activity(GO:0016853);;molecular_function:triose-phosphate isomerase activity(GO:0004807);;cellular_component:cytopla…	P48495|TPIS_PETHY|-125.8|Triosephosphate isomerase, cytosolic OS=Petunia hybrida GN=TPIP1 PE=2 SV=1	4113.PGSC0003DMT400071330|-126.7|COG0149|G|triosephosphate isomerase	PF00121.17|TIM|1.5e-87|Triosephosphate isomerase
c232637/f1p100/1954	XP_008790219.1|0x1.c0496af26125ep-179|PREDICTED: protein WVD2-like 4 [Phoenix dactylifera]	-	cellular_component:microtubule(GO:0005874);;cellular_component:cytoplasm(GO:0005737);;cellular_component:cytoskeleton(GO:0005856);;cellular_component:cytoskeleton(GO:0005856)	Q9SJ62|WDL4_ARATH|-36.7|Protein WVD2-like 4 OS=Arabidopsis thaliana GN=WDL4 PE=1 SV=2	4641.GSMUA_Achr8P04730_001|-47.0|ENOG410YUCH|S|lymphoid organ expressed yellow head virus receptor protein	-
c61833/f1p5/2270	-	-	-	-	3694.POPTR_0002s20990.1|-20.4|ENOG4111YQX|K|homeobox protein	-
c31689/f1p347/2733	XP_020241728.1|0x1.ce8f367941a3ep-791|26S protease regulatory subunit 7-like isoform X1 [Asparagus officinalis]_x0001_XP_020241729.1 26S protease regulatory subunit 7-like isoform X2 [Asparagus officinalis]_x0001_ONK60936.1 uncharacterized protein A4U43_C08F24300 [Asparagus officinalis]	mus:103973835|-237.9|K03061|PSMC2, RPT1; 26S proteasome regulatory subunit T1|ko03050|Proteasome;;	cellular_component:nucleus(GO:0005634);;cellular_component:nucleus(GO:0005634);;cellular_component:cytoplasm(GO:0005737);;cellular_component:cytoplasm(GO:0005737);;molecular_function:nucleotide binding(GO:0000166);;cellular_component:proteasome complex(GO:0000502);;molecular_function:ATP binding(GO:0005524)	O64982|PRS7_PRUPE|-239.9|26S proteasome regulatory subunit 7 OS=Prunus persica GN=RPT1 PE=2 SV=1	4641.GSMUA_AchrUn_randomP12540_001|-239.2|COG1222|O|26S protease regulatory subunit	PF00004.28|AAA|2.3e-39|ATPase family associated with various cellular activities (AAA)
c302847/f1p18/1501	AAX07221.1|0x1.583e8b368eb15p-698|chloroplast cysteine synthase GCS2 [Allium sativum]	pda:103715024|-166.7|K01738|cysK; cysteine synthase A [EC:2.5.1.47]|ko01200|Carbon metabolism;;ko01230|Biosynthesis of amino acids;;ko00270|Cysteine and methionine metabolism;;ko00920|Sulfur metabolism;;	cellular_component:chromoplast(GO:0009509);;cellular_component:chromoplast(GO:0009509);;cellular_component:plastid(GO:0009536);;cellular_component:chloroplast stroma(GO:0009570);;molecular_function:transferase activity(GO:0016740);;biological_process:cysteine biosynthetic process(GO:0019344);;biological_process:cysteine biosynthetic process(GO:0019344);;molecular_function:cysteine synthase activi…	P32260|CYSKP_SPIOL|-160.1|Cysteine synthase, chloroplastic/chromoplastic OS=Spinacia oleracea GN=CYSK PE=1 SV=2	3694.POPTR_0013s13150.1|-167.2|COG0031|E|cysteine biosynthetic process from serine	PF00291.24|PALP|3.7e-67|Pyridoxal-phosphate dependent enzyme
c115299/f1p10/1487	XP_020256647.1|0x1.e9b6acce9a03ep-360|phosphoglycerate kinase, cytosolic [Asparagus officinalis]_x0001_ONK74841.1 uncharacterized protein A4U43_C03F10680 [Asparagus officinalis]	vra:106762334|-108.2|K00927|PGK, pgk; phosphoglycerate kinase [EC:2.7.2.3]|ko00710|Carbon fixation in photosynthetic organisms;;ko01200|Carbon metabolism;;ko01230|Biosynthesis of amino acids;;ko00010|Glycolysis / Gluconeogenesis;;	cellular_component:cytoplasm(GO:0005737);;cellular_component:cytoplasm(GO:0005737);;biological_process:glycolytic process(GO:0006096);;biological_process:glycolytic process(GO:0006096);;molecular_function:kinase activity(GO:0016301);;biological_process:phosphorylation(GO:0016310);;molecular_function:transferase activity(GO:0016740);;molecular_function:nucleotide binding(GO:0000166);;molecular_fun…	Q42962|PGKY_TOBAC|-107.5|Phosphoglycerate kinase, cytosolic OS=Nicotiana tabacum PE=2 SV=1	3711.Bra008421.1-P|-106.9|COG0126|G|phosphoglycerate kinase	PF00162.18|PGK|3.8e-87|Phosphoglycerate kinase
c280751/f1p10/1123	XP_020100851.1|0x1.e91c8f74e6114p-147|aspartyl protease family protein At5g10770-like [Ananas comosus]_x0001_OAY73097.1 Protein ASPARTIC PROTEASE IN GUARD CELL 2 [Ananas comosus]	-	molecular_function:peptidase activity(GO:0008233);;molecular_function:hydrolase activity(GO:0016787);;cellular_component:apoplast(GO:0048046);;cellular_component:apoplast(GO:0048046);;molecular_function:aspartic-type endopeptidase activity(GO:0004190);;cellular_component:extracellular region(GO:0005576);;biological_process:proteolysis(GO:0006508)	Q9LEW3|AED1_ARATH|-29.7|Aspartyl protease AED1 OS=Arabidopsis thaliana GN=AED1 PE=2 SV=1	4641.GSMUA_Achr3P11930_001|-42.9|ENOG410XNV7|O|aspartic	-
c40427/f1p31/2629	XP_020589214.1|0x1.33dc576579485p-494|LOW QUALITY PROTEIN: uncharacterized protein LOC110030699 [Phalaenopsis equestris]	-	cellular_component:membrane(GO:0016020);;cellular_component:membrane(GO:0016020);;cellular_component:integral component of membrane(GO:0016021)	Q9M1I2|PTR46_ARATH|-76.9|Protein NRT1/ PTR FAMILY 5.4 OS=Arabidopsis thaliana GN=NPF5.4 PE=2 SV=1	4641.GSMUA_Achr8P32440_001|-92.8|COG3104|E|transporter	PF00854.20|PTR2|2e-81|POT family
c17887/f1p18/3761	XP_020111752.1|0x1.aa7cd2a731e1p-670|DNA repair protein RAD50 [Ananas comosus]	egu:105049145|-202.1|K10866|RAD50; DNA repair protein RAD50 [EC:3.6.-.-]|ko03450|Non-homologous end-joining;;ko03440|Homologous recombination;;	molecular_function:protein binding(GO:0005515);;molecular_function:ATP binding(GO:0005524);;cellular_component:nucleus(GO:0005634);;cellular_component:nucleus(GO:0005634);;cellular_component:chromosome(GO:0005694);;biological_process:DNA repair(GO:0006281);;biological_process:cellular response to DNA damage stimulus(GO:0006974);;biological_process:cell cycle(GO:0007049);;molecular_function:hydrol…	Q9SL02|RAD50_ARATH|-180.5|DNA repair protein RAD50 OS=Arabidopsis thaliana GN=RAD50 PE=1 SV=2	4641.GSMUA_Achr9P07290_001|-200.1|COG0419|L|Involved in DNA double-strand break repair (DSBR). The Rad50 Mre11 complex possesses single-strand endonuclease activity and ATP-dependent double-strand-specific 3'-5' exonuclease activity. Rad50 provides an ATP-dependent control of Mre11 by unwinding and or repositioning DNA ends into the Mre11 active site (By similarity)	-
c276216/f1p9/1244	ONK78709.1|0x1.6ce7022376e2ep-93|uncharacterized protein A4U43_C02F21620 [Asparagus officinalis]	-	-	-	29760.VIT_07s0005g00990.t01|-24.9|-|-|-	-
c8207/f1p18/2310	XP_010936931.1|0x1.6b577f5ee993ep-130|PREDICTED: probable protein phosphatase 2C 55 isoform X1 [Elaeis guineensis]	-	molecular_function:metal ion binding(GO:0046872);;molecular_function:phosphoprotein phosphatase activity(GO:0004721);;molecular_function:phosphoprotein phosphatase activity(GO:0004721);;molecular_function:hydrolase activity(GO:0016787)	Q9SUK9|P2C55_ARATH|-37.5|Probable protein phosphatase 2C 55 OS=Arabidopsis thaliana GN=At4g16580 PE=2 SV=2	4641.GSMUA_Achr9P09210_001|-40.1|COG0631|T|Phosphatase	-
c2794/f1p17/4844	XP_008791401.1|0x1.16ae8f6acfd55p-652|PREDICTED: TPR repeat-containing thioredoxin TTL1 [Phoenix dactylifera]	-	biological_process:abscisic acid-activated signaling pathway(GO:0009738);;biological_process:positive regulation of abscisic acid-activated signaling pathway(GO:0009789);;biological_process:response to osmotic stress(GO:0006970);;biological_process:response to salt stress(GO:0009651);;biological_process:response to abscisic acid(GO:0009737)	Q9MAH1|TTL1_ARATH|-140.1|TPR repeat-containing thioredoxin TTL1 OS=Arabidopsis thaliana GN=TTL1 PE=1 SV=1	39946.BGIOSGA017468-PA|-180.1|ENOG410XSU5|O|TPR repeat-containing thioredoxin TTL1-like	-
c93442/f2p3/1067	XP_020577713.1|0x1.c03658e858fcp-251|CAX-interacting protein 4 [Phalaenopsis equestris]	-	-	-	4113.PGSC0003DMT400047576|-67.9|ENOG4111Q32|S|NA	-
c6255/f1p9/1296	ANH58212.1|0x1.01ee3a6357ba2p-225|glutathione S-transferase [Dracaena cambodiana]	-	biological_process:response to toxic substance(GO:0009636);;cellular_component:membrane(GO:0016020);;molecular_function:transferase activity(GO:0016740);;molecular_function:glutathione transferase activity(GO:0004364);;cellular_component:plasma membrane(GO:0005886);;cellular_component:plasma membrane(GO:0005886)	O80662|TCHQD_ARATH|-28.4|Glutathione S-transferase TCHQD OS=Arabidopsis thaliana GN=TCHQD PE=2 SV=1	4513.MLOC_79261.1|-62.3|ENOG410YE2J|U|ganglioside induced differentiation associated protein	-
c88702/f1p103/1857	AKR15681.1|0x1.d6e1cd0cb6fabp-448|coat protein [Garlic virus X]	-	-	-	-	PF00286.19|Flexi_CP|3.7e-45|Viral coat protein
c117382/f1p12/1487	XP_020537564.1|0x1.20a12ad2391dap-95|serine/threonine-protein kinase AFC2 isoform X3 [Jatropha curcas]_x0001_XP_020537565.1 serine/threonine-protein kinase AFC2 isoform X3 [Jatropha curcas]	-	molecular_function:ATP binding(GO:0005524);;molecular_function:kinase activity(GO:0016301);;biological_process:phosphorylation(GO:0016310);;molecular_function:transferase activity(GO:0016740);;molecular_function:nucleotide binding(GO:0000166);;molecular_function:protein serine/threonine kinase activity(GO:0004674);;molecular_function:protein serine/threonine/tyrosine kinase activity(GO:0004712)	P51566|AFC1_ARATH|-31.0|Serine/threonine-protein kinase AFC1 OS=Arabidopsis thaliana GN=AFC1 PE=2 SV=2	4081.Solyc03g112050.2.1|-32.8|ENOG410XQF2|T|CDC-like kinase	-
c1667/f1p8/4201	BAF26808.1|0x1.8d20204a47e8bp-151|Os10g0485100, partial [Oryza sativa Japonica Group]_x0001_BAT11374.1 Os10g0485100, partial [Oryza sativa Japonica Group]	-	-	-	4555.Si033961m|-49.4|ENOG410ZK78|S|NA	-
c13632/f1p141/2545	AHB39218.1|0x1.994cb3e708fep-453|polyprotein [Leek yellow stripe virus]	-	-	-	-	PF00767.17|Poty_coat|3.1e-88|Potyvirus coat protein
c27128/f1p264/2262	AAX07223.1|0x1.2e5d583fcb0b5p-611|putative S-allyl-cysteine synthase [Allium sativum]	egu:105040461|-128.5|K01738|cysK; cysteine synthase A [EC:2.5.1.47]|ko01200|Carbon metabolism;;ko01230|Biosynthesis of amino acids;;ko00270|Cysteine and methionine metabolism;;ko00920|Sulfur metabolism;;	cellular_component:chromoplast(GO:0009509);;cellular_component:chromoplast(GO:0009509);;cellular_component:plastid(GO:0009536);;cellular_component:chloroplast stroma(GO:0009570);;molecular_function:transferase activity(GO:0016740);;biological_process:cysteine biosynthetic process(GO:0019344);;biological_process:cysteine biosynthetic process(GO:0019344);;molecular_function:cysteine synthase activi…	P32260|CYSKP_SPIOL|-98.7|Cysteine synthase, chloroplastic/chromoplastic OS=Spinacia oleracea GN=CYSK PE=1 SV=2	4641.GSMUA_Achr2P16640_001|-126.5|COG0031|E|cysteine biosynthetic process from serine	PF00291.24|PALP|3e-61|Pyridoxal-phosphate dependent enzyme
c26752/f1p19/3420	XP_020243419.1|0x1.1db92bef0b101p-344|metal-nicotianamine transporter YSL3-like [Asparagus officinalis]_x0001_ONK79909.1 uncharacterized protein A4U43_C01F11710 [Asparagus officinalis]	-	cellular_component:integral component of membrane(GO:0016021);;biological_process:iron ion homeostasis(GO:0055072);;biological_process:ion transport(GO:0006811);;cellular_component:membrane(GO:0016020);;cellular_component:membrane(GO:0016020)	Q2EF88|YSL3_ARATH|-94.5|Metal-nicotianamine transporter YSL3 OS=Arabidopsis thaliana GN=YSL3 PE=2 SV=1	4641.GSMUA_Achr4P24800_001|-96.6|COG1297|S|oligo-peptide transporter	PF03169.14|OPT|1.2e-46|OPT oligopeptide transporter protein
c188121/f1p87/1903	XP_020570594.1|0x1.45f90034c0f32p-568|alpha-galactosidase-like [Phalaenopsis equestris]	mus:103982384|-171.4|K07407|E3.2.1.22B, galA, rafA; alpha-galactosidase [EC:3.2.1.22]|ko00603|Glycosphingolipid biosynthesis - globo and isoglobo series;;ko00561|Glycerolipid metabolism;;ko00052|Galactose metabolism;;ko00600|Sphingolipid metabolism;;	molecular_function:hydrolase activity, acting on glycosyl bonds(GO:0016798);;molecular_function:raffinose alpha-galactosidase activity(GO:0052692);;molecular_function:alpha-galactosidase activity(GO:0004557);;biological_process:metabolic process(GO:0008152);;molecular_function:hydrolase activity(GO:0016787)	Q42656|AGAL_COFAR|-171.0|Alpha-galactosidase OS=Coffea arabica PE=1 SV=1	29760.VIT_10s0071g01120.t01|-168.5|ENOG410XPF1|G|alpha-galactosidase	PF16499.4|Melibiase_2|2.3e-79|Alpha galactosidase A
c2809/f1p428/5274	XP_020244668.1|0x1.1996cdbf393p-630|pyrophosphate-energized vacuolar membrane proton pump [Asparagus officinalis]_x0001_ONK60265.1 uncharacterized protein A4U43_C08F16220 [Asparagus officinalis]	-	cellular_component:vacuolar membrane(GO:0005774);;cellular_component:plasma membrane(GO:0005886);;cellular_component:plasma membrane(GO:0005886);;biological_process:ion transport(GO:0006811);;cellular_component:endosome membrane(GO:0010008);;biological_process:proton transport(GO:0015992);;cellular_component:membrane(GO:0016020);;cellular_component:integral component of membrane(GO:0016021);;mole…	P31414|AVP1_ARATH|-186.1|Pyrophosphate-energized vacuolar membrane proton pump 1 OS=Arabidopsis thaliana GN=AVP1 PE=1 SV=1	4113.PGSC0003DMT400036847|-187.7|COG3808|C|pump that utilizes the energy of pyrophosphate hydrolysis as the driving force for	PF03030.15|H_PPase|3.8e-109|Inorganic H+ pyrophosphatase
c27553/f1p81/3071	XP_008805070.1|0x1.ae97e2716ce63p-823|PREDICTED: suppressor of mec-8 and unc-52 protein homolog 1 [Phoenix dactylifera]	-	cellular_component:nucleus(GO:0005634);;cellular_component:nucleus(GO:0005634)	Q8W117|SMU1_ARATH|-225.0|Suppressor of mec-8 and unc-52 protein homolog 1 OS=Arabidopsis thaliana GN=SMU1 PE=1 SV=1	4641.GSMUA_Achr9P08610_001|-246.5|ENOG410XP39|S|Smu-1 suppressor of mec-8 and unc-52 homolog (C. elegans)	-
c35387/f1p35/2505	XP_020273613.1|0x1.a6ad134c0572bp-419|probable importin subunit beta-4 isoform X1 [Asparagus officinalis]_x0001_ONK65428.1 uncharacterized protein A4U43_C07F37020 [Asparagus officinalis]	-	-	-	4641.GSMUA_Achr7P22520_001|-123.9|ENOG410XP2Z|U|Importin	-
c337574/f1p4/787	PKA53318.1|0x1.7194aa906acbbp-261|Protein mago nashi like [Apostasia shenzhenica]	egu:105053939|-78.1|K12877|MAGOH; protein mago nashi|ko03040|Spliceosome;;ko03015|mRNA surveillance pathway;;ko03013|RNA transport;;	cellular_component:nucleus(GO:0005634);;cellular_component:nucleus(GO:0005634);;cellular_component:cytoplasm(GO:0005737);;cellular_component:cytoplasm(GO:0005737);;biological_process:mRNA processing(GO:0006397);;biological_process:regulation of translation(GO:0006417);;biological_process:RNA splicing(GO:0008380);;biological_process:mRNA transport(GO:0051028);;biological_process:nuclear-transcribe…	P49030|MGN2_ORYSJ|-77.2|Protein mago nashi homolog 2 OS=Oryza sativa subsp. japonica GN=MAGO2 PE=1 SV=2	29760.VIT_16s0013g00610.t01|-77.0|ENOG4111FJ7|A|Mago nashi	PF02792.13|Mago_nashi|1.4e-80|Mago nashi protein
c25670/f1p81/3117	XP_020274610.1|0x1.443a392013443p-146|RNA-binding KH domain-containing protein RCF3-like isoform X1 [Asparagus officinalis]	-	-	-	29760.VIT_01s0026g02650.t01|-40.0|ENOG410XNN8|S|mRNA transport	-
c13205/f1p6/1430	XP_020267469.1|0x1.9270b79e643b7p-82|26S proteasome regulatory subunit RPN11-like isoform X1 [Asparagus officinalis]	-	-	-	-	-
c3049/f2p76/1380	XP_006399840.1|0x1.1ebdfe0f38148p-167|hypothetical protein EUTSA_v10013800mg [Eutrema salsugineum]_x0001_ESQ41293.1 hypothetical protein EUTSA_v10013800mg [Eutrema salsugineum]	-	cellular_component:membrane(GO:0016020);;cellular_component:integral component of membrane(GO:0016021);;cellular_component:mitochondrion(GO:0005739);;cellular_component:mitochondrial inner membrane(GO:0005743);;cellular_component:mitochondrial inner membrane(GO:0005743)	P27081|ADT2_SOLTU|-51.0|ADP,ATP carrier protein, mitochondrial (Fragment) OS=Solanum tuberosum GN=ANT1 PE=2 SV=1	3711.Bra008826.1-P|-51.8|ENOG410XNW0|U|transmembrane transport	-
c126597/f1p0/904	XP_020701951.1|0x1.405ebeba0d1ap-260|uncharacterized protein At2g39795, mitochondrial isoform X1 [Dendrobium catenatum]_x0001_PKU74666.1 Uncharacterized protein MA16_Dca004857 [Dendrobium catenatum]	-	-	-	4641.GSMUA_Achr4P31320_001|-78.1|ENOG4111MS5|S|Mitochondrial glycoprotein family protein	-
c25246/f1p35/3083	XP_020210923.1|0x1.642071e8b9394p-716|pre-mRNA-splicing factor prp12 [Cajanus cajan]	pda:103712080|-144.8|K12830|SF3B3, SAP130, RSE1; splicing factor 3B subunit 3|ko03040|Spliceosome;;	-	-	4641.GSMUA_Achr9P11080_001|-172.4|ENOG410XPFQ|A|Splicing factor 3b subunit	PF03178.14|CPSF_A|3.4e-33|CPSF A subunit region
c1948/f1p3/4266	XP_020241723.1|0x1.fbb504cf78238p-830|pantothenate kinase 1-like isoform X1 [Asparagus officinalis]	pda:103706819|-219.0|K09680|coaW; type II pantothenate kinase [EC:2.7.1.33]|ko00770|Pantothenate and CoA biosynthesis;;	biological_process:coenzyme A biosynthetic process(GO:0015937);;biological_process:coenzyme A biosynthetic process(GO:0015937);;molecular_function:kinase activity(GO:0016301);;biological_process:phosphorylation(GO:0016310);;molecular_function:transferase activity(GO:0016740);;molecular_function:nucleotide binding(GO:0000166);;molecular_function:pantothenate kinase activity(GO:0004594);;molecular_…	Q69TF4|PANK1_ORYSJ|-210.5|Pantothenate kinase 1 OS=Oryza sativa subsp. japonica GN=Os06g0207000 PE=2 SV=1	4555.Si006009m|-215.2|COG5146|H|PaNtothenate Kinase	PF03630.13|Fumble|1.3e-83|Fumble
c82022/f1p61/1668	-	-	-	-	4641.GSMUA_Achr5P28260_001|-25.7|ENOG410XR0Z|S|zinc finger CCCH domain-containing protein	-
c12773/f1p4/2171	XP_020254804.1|0x1.6f48eb3181acdp-392|acyltransferase-like protein At1g54570, chloroplastic isoform X3 [Asparagus officinalis]_x0001_XP_020254805.1 acyltransferase-like protein At1g54570, chloroplastic isoform X3 [Asparagus officinalis]_x0001_XP_020254806.1 acyltransferase-like protein At1g54570, chloroplastic isoform X3 [Asparagus officinalis]_x0001_XP_020254807.1 acyltransferase-like protein At…	-	molecular_function:transferase activity(GO:0016740);;molecular_function:transferase activity, transferring acyl groups(GO:0016746);;cellular_component:chloroplast(GO:0009507);;cellular_component:plastid(GO:0009536);;cellular_component:plastoglobule(GO:0010287)	Q9ZVN2|Y1457_ARATH|-30.8|Acyltransferase-like protein At1g54570, chloroplastic OS=Arabidopsis thaliana GN=At1g54570 PE=1 SV=1	4577.GRMZM2G031568_P01|-80.5|COG0204|I|Acyltransferase	-
c29113/f1p66/3622	XP_020272268.1|0x1.1d3151c6e7259p-767|LOW QUALITY PROTEIN: phosphoinositide phospholipase C 4-like [Asparagus officinalis]	pda:103706677|-224.6|K05857|PLCD; phosphatidylinositol phospholipase C, delta [EC:3.1.4.11]|ko04933|AGE-RAGE signaling pathway in diabetic complications;;ko00562|Inositol phosphate metabolism;;ko04070|Phosphatidylinositol signaling system;;	cellular_component:plasma membrane(GO:0005886);;biological_process:lipid metabolic process(GO:0006629);;biological_process:signal transduction(GO:0007165);;cellular_component:membrane(GO:0016020);;biological_process:lipid catabolic process(GO:0016042);;molecular_function:hydrolase activity(GO:0016787);;molecular_function:phosphatidylinositol phospholipase C activity(GO:0004435);;molecular_functio…	Q8GV43|PLCD6_ARATH|-193.0|Phosphoinositide phospholipase C 6 OS=Arabidopsis thaliana GN=PLC6 PE=2 SV=2	4641.GSMUA_Achr5P28270_001|-220.7|ENOG410XPSW|S|phospholipase c	PF00388.18|PI-PLC-X|3.9e-48|Phosphatidylinositol-specific phospholipase C, X domain
c21308/f2p291/3154	XP_020261433.1|0x0p+0|puromycin-sensitive aminopeptidase isoform X1 [Asparagus officinalis]_x0001_ONK72362.1 uncharacterized protein A4U43_C04F18630 [Asparagus officinalis]	egu:105055608|-10000.0|K01256|pepN; aminopeptidase N [EC:3.4.11.2]|ko00480|Glutathione metabolism;;	molecular_function:metallopeptidase activity(GO:0008237);;molecular_function:hydrolase activity(GO:0016787);;molecular_function:metal ion binding(GO:0046872);;molecular_function:aminopeptidase activity(GO:0004177);;biological_process:proteolysis(GO:0006508);;molecular_function:peptidase activity(GO:0008233)	B7EA73|PSA_ORYSJ|-10000.0|Puromycin-sensitive aminopeptidase OS=Oryza sativa subsp. japonica GN=Os08g0562700 PE=2 SV=1	4538.ORGLA08G0192000.1|-10000.0|COG0308|E|aminopeptidase	PF17432.1|DUF3458_C|8e-128|Domain of unknown function (DUF3458_C) ARM repeats
c27592/f1p78/1835	ABU85440.1|0x1.94b6ffa72b50dp-280|RNA polymerase beta subunit, partial (chloroplast) [Musa acuminata]	sind:11452388|-83.1|K03046|rpoC; DNA-directed RNA polymerase subunit beta' [EC:2.7.7.6]|ko00230|Purine metabolism;;ko00240|Pyrimidine metabolism;;ko03020|RNA polymerase;;	cellular_component:chloroplast(GO:0009507);;cellular_component:plastid(GO:0009536);;molecular_function:transferase activity(GO:0016740);;molecular_function:nucleotidyltransferase activity(GO:0016779);;molecular_function:DNA-directed 5'-3' RNA polymerase activity(GO:0003899);;molecular_function:DNA-directed 5'-3' RNA polymerase activity(GO:0003899);;cellular_component:chloroplast(GO:0009507)	A9L987|RPOC1_LEMMI|-86.4|DNA-directed RNA polymerase subunit beta' OS=Lemna minor GN=rpoC1 PE=3 SV=1	59689.scaffold_201045.1|-80.6|COG0085|K|DNA-dependent RNA polymerase catalyzes the transcription of DNA into RNA using the four ribonucleoside triphosphates as substrates (By similarity)	-
c16795/f1p40/2824	XP_020242695.1|0x1.11092109d05dep-556|pyrophosphate--fructose 6-phosphate 1-phosphotransferase subunit beta 1, partial [Asparagus officinalis]	mus:103990863|-164.9|K00895|pfp, PFP; diphosphate-dependent phosphofructokinase [EC:2.7.1.90]|ko00030|Pentose phosphate pathway;;ko00051|Fructose and mannose metabolism;;ko00010|Glycolysis / Gluconeogenesis;;	biological_process:glycolytic process(GO:0006096);;biological_process:glycolytic process(GO:0006096);;biological_process:metabolic process(GO:0008152);;molecular_function:kinase activity(GO:0016301);;biological_process:phosphorylation(GO:0016310);;molecular_function:transferase activity(GO:0016740);;molecular_function:metal ion binding(GO:0046872);;molecular_function:diphosphate-fructose-6-phosph…	Q8W4M5|PFPB1_ARATH|-160.6|Pyrophosphate--fructose 6-phosphate 1-phosphotransferase subunit beta 1 OS=Arabidopsis thaliana GN=PFP-BETA1 PE=1 SV=1	4641.GSMUA_Achr7P02210_001|-166.2|COG0205|G|phosphohexokinase	-
c223031/f1p4/1253	XP_020270922.1|0x1.44e44de277614p-182|uncharacterized protein LOC109846105 isoform X1 [Asparagus officinalis]_x0001_XP_020270926.1 uncharacterized protein LOC109846105 isoform X2 [Asparagus officinalis]	-	-	-	4641.GSMUA_Achr3P28170_001|-25.2|COG5175|K|CCR4-NOT transcription complex subunit 4	-
c258310/f17p44/1702	XP_009417518.1|0x1.cfce3bb18e44ep-637|PREDICTED: oligouridylate-binding protein 1B isoform X2 [Musa acuminata subsp. malaccensis]	-	biological_process:mRNA processing(GO:0006397);;molecular_function:RNA binding(GO:0003723);;cellular_component:nucleus(GO:0005634);;cellular_component:nucleus(GO:0005634)	Q9LQI9|UBP1B_ARATH|-146.0|Oligouridylate-binding protein 1B OS=Arabidopsis thaliana GN=UBP1B PE=1 SV=1	4641.GSMUA_Achr9P14120_001|-184.0|ENOG410XQ8U|S|TIA1 cytotoxic granule-associated RNA binding	-
c9148/f1p25/2193	XP_020266362.1|0x1.e6a685b753c14p-312|LOW QUALITY PROTEIN: uncharacterized protein LOC109841836 [Asparagus officinalis]	-	-	-	4533.OB03G44600.1|-35.4|ENOG4111PBB|S|NA	-
c12566/f1p5/2280	ONK71480.1|0x1.c8db4c783060fp-426|uncharacterized protein A4U43_C04F9090 [Asparagus officinalis]	-	-	-	4538.ORGLA02G0248600.1|-119.9|COG0317|KT|In eubacteria ppGpp (guanosine 3'-diphosphate 5-' diphosphate) is a mediator of the stringent response that coordinates a variety of cellular activities in response to changes in nutritional abundance (By similarity)	-
c2803/f1p10/2749	XP_020265124.1|0x1.3b4d0480a2183p-109|cytochrome P450 72A15-like isoform X1 [Asparagus officinalis]_x0001_XP_020265125.1 cytochrome P450 72A15-like isoform X2 [Asparagus officinalis]	-	-	-	4641.GSMUA_Achr4P02810_001|-30.2|COG2124|Q|Cytochrome p450	-
c63432/f1p1/1041	PKA52800.1|0x1.d69599039d61fp-140|hypothetical protein AXF42_Ash001781 [Apostasia shenzhenica]	-	-	-	29760.VIT_13s0067g02220.t01|-41.2|COG0814|E|amino acid transport	-
c237499/f1p64/1613	OWM83633.1|0x1.529db82ba20dap-291|hypothetical protein CDL15_Pgr004062 [Punica granatum]	egr:104448673|-86.9|K12741|HNRNPA1_3; heterogeneous nuclear ribonucleoprotein A1/A3|ko03040|Spliceosome;;	molecular_function:RNA binding(GO:0003723);;cellular_component:nucleus(GO:0005634);;cellular_component:nucleus(GO:0005634)	Q9LES2|UBA2A_ARATH|-33.9|UBP1-associated protein 2A OS=Arabidopsis thaliana GN=UBA2A PE=1 SV=1	4555.Si001335m|-86.5|COG0724|S|Rna-binding protein	-
c21561/f1p24/2662	XP_020265159.1|0x1.0ba46011a42adp-552|3-hydroxyisobutyryl-CoA hydrolase-like protein 5 [Asparagus officinalis]_x0001_ONK69967.1 uncharacterized protein A4U43_C05F28820 [Asparagus officinalis]	egu:105047243|-161.2|K05605|HIBCH; 3-hydroxyisobutyryl-CoA hydrolase [EC:3.1.2.4]|ko01200|Carbon metabolism;;ko00640|Propanoate metabolism;;ko00410|beta-Alanine metabolism;;ko00280|Valine, leucine and isoleucine degradation;;	molecular_function:hydrolase activity(GO:0016787)	Q9SHJ8|HIBC8_ARATH|-146.3|3-hydroxyisobutyryl-CoA hydrolase-like protein 5 OS=Arabidopsis thaliana GN=At1g06550 PE=1 SV=2	4641.GSMUA_Achr9P06670_001|-154.6|COG1024|I|Enoyl-CoA hydratase	PF16113.4|ECH_2|1.2e-113|Enoyl-CoA hydratase/isomerase
c10938/f2p42/1702	XP_019705607.1|0x1.1e4918985f28cp-539|PREDICTED: pre-mRNA-processing protein 40A isoform X2 [Elaeis guineensis]	egu:105042956|-163.1|K12821|PRPF40, PRP40; pre-mRNA-processing factor 40|ko03040|Spliceosome;;	biological_process:regulation of transcription, DNA-templated(GO:0006355);;cellular_component:mediator complex(GO:0016592);;cellular_component:nucleus(GO:0005634);;cellular_component:nucleus(GO:0005634);;biological_process:transcription, DNA-templated(GO:0006351)	B6EUA9|PR40A_ARATH|-141.1|Pre-mRNA-processing protein 40A OS=Arabidopsis thaliana GN=PRP40A PE=1 SV=1	4641.GSMUA_Achr9P19530_001|-164.0|COG5104|A|PRP40 pre-mRNA processing factor 40 homolog	-
c43068/f1p11/1444	ONK64965.1|0x1.33c597e95129fp-146|uncharacterized protein A4U43_C07F31980 [Asparagus officinalis]	egu:105046771|-46.7|K12617|PATL1, PAT1; DNA topoisomerase 2-associated protein PAT1|ko03018|RNA degradation;;	-	-	4641.GSMUA_Achr6P31430_001|-40.1|ENOG410YXYM|S|expressed protein	-
c218975/f2p9/1228	XP_020261562.1|0x1.14cf6b9bc9e49p-108|thiol protease SEN102-like [Asparagus officinalis]_x0001_ONK72519.1 uncharacterized protein A4U43_C04F20260 [Asparagus officinalis]	-	molecular_function:hydrolase activity(GO:0016787);;cellular_component:cytoplasmic vesicle(GO:0031410);;biological_process:proteolysis(GO:0006508);;molecular_function:peptidase activity(GO:0008233);;molecular_function:cysteine-type peptidase activity(GO:0008234)	O65039|CYSEP_RICCO|-33.4|Vignain OS=Ricinus communis GN=CYSEP PE=1 SV=1	3847.GLYMA17G13530.1|-31.6|COG4870|O|cathepsin	PF00112.22|Peptidase_C1|8.3e-29|Papain family cysteine protease
c11826/f1p12/1355	XP_020270302.1|0x1.5b4762001a3c5p-328|BTB/POZ domain-containing protein At1g30440-like [Asparagus officinalis]_x0001_ONK67337.1 uncharacterized protein A4U43_C06F19120 [Asparagus officinalis]	-	biological_process:protein ubiquitination(GO:0016567)	Q9S9Q9|Y1044_ARATH|-84.5|BTB/POZ domain-containing protein At1g30440 OS=Arabidopsis thaliana GN=At1g30440 PE=1 SV=2	3694.POPTR_0011s09340.1|-98.2|ENOG410ZHWZ|S|BTB POZ domain-containing protein	PF03000.13|NPH3|4.3e-72|NPH3 family
c40929/f1p39/2301	XP_020265745.1|0x1.98c4a82f8637ap-443|leucine aminopeptidase 1-like [Asparagus officinalis]_x0001_ONK70450.1 uncharacterized protein A4U43_C05F33850 [Asparagus officinalis]	-	cellular_component:chloroplast(GO:0009507);;cellular_component:chloroplast(GO:0009507);;cellular_component:plastid(GO:0009536);;molecular_function:hydrolase activity(GO:0016787);;molecular_function:manganese ion binding(GO:0030145);;molecular_function:metal ion binding(GO:0046872);;molecular_function:aminopeptidase activity(GO:0004177);;biological_process:proteolysis(GO:0006508);;molecular_functi…	Q6K669|AMPL2_ORYSJ|-133.5|Leucine aminopeptidase 2, chloroplastic OS=Oryza sativa subsp. japonica GN=Os02g0794700 PE=2 SV=1	4533.OB02G42580.1|-132.8|COG0260|E|Presumably involved in the processing and regular turnover of intracellular proteins. Catalyzes the removal of unsubstituted N-terminal amino acids from various peptides (By similarity)	PF00883.20|Peptidase_M17|9.2e-104|Cytosol aminopeptidase family, catalytic domain
c62058/f1p24/1169	XP_020248096.1|0x1.fb123e1704195p-132|THO complex subunit 1 isoform X1 [Asparagus officinalis]	pda:103712979|-39.6|K12878|THOC1; THO complex subunit 1|ko03040|Spliceosome;;ko03013|RNA transport;;	cellular_component:nucleus(GO:0005634);;biological_process:mRNA processing(GO:0006397);;biological_process:defense response(GO:0006952);;biological_process:RNA splicing(GO:0008380);;biological_process:gene silencing by RNA(GO:0031047);;biological_process:mRNA transport(GO:0051028);;cellular_component:THO complex(GO:0000347);;molecular_function:RNA binding(GO:0003723);;cellular_component:nucleus(G…	Q93VM9|THOC1_ARATH|-36.0|THO complex subunit 1 OS=Arabidopsis thaliana GN=THO1 PE=1 SV=1	4577.GRMZM2G006673_P02|-39.6|ENOG410XQEX|S|tHO complex	-
c33480/f1p209/1980	AAK95661.1|0x1.4a76e519bdef7p-473|alliinase, partial [Allium sativum]	-	molecular_function:alliin lyase activity(GO:0047654);;cellular_component:vacuole(GO:0005773);;cellular_component:vacuole(GO:0005773);;molecular_function:lyase activity(GO:0016829)	Q01594|ALLN1_ALLSA|-145.3|Alliin lyase 1 OS=Allium sativum PE=1 SV=1	29760.VIT_18s0157g00140.t01|-60.8|ENOG410XS9Z|S|tryptophan aminotransferase-related protein 4-like	PF04864.12|Alliinase_C|1.6e-107|Allinase
c22187/f1p13/2894	XP_020098096.1|0x1.08eb0bb4ee145p-135|type IV inositol polyphosphate 5-phosphatase 3-like isoform X2 [Ananas comosus]	-	molecular_function:phosphatidylinositol-3,4,5-trisphosphate 5-phosphatase activity(GO:0034485);;biological_process:phosphatidylinositol dephosphorylation(GO:0046856);;molecular_function:phosphatidylinositol-4,5-bisphosphate 5-phosphatase activity(GO:0004439);;molecular_function:phosphatidylinositol-4,5-bisphosphate 5-phosphatase activity(GO:0004439);;molecular_function:hydrolase activity(GO:00167…	Q8H0Z6|IP5P3_ARATH|-31.6|Type IV inositol polyphosphate 5-phosphatase 3 OS=Arabidopsis thaliana GN=IP5P3 PE=1 SV=1	3847.GLYMA16G27760.3|-34.9|COG5411|T|inositol	-
c92107/f1p24/1609	XP_019187904.1|0x1.1de7f6f035622p-172|PREDICTED: S-adenosylmethionine synthase 3 [Ipomoea nil]	egu:105044935|-52.4|K00789|metK; S-adenosylmethionine synthetase [EC:2.5.1.6]|ko01230|Biosynthesis of amino acids;;ko00270|Cysteine and methionine metabolism;;	cellular_component:cytoplasm(GO:0005737);;cellular_component:cytoplasm(GO:0005737);;biological_process:S-adenosylmethionine biosynthetic process(GO:0006556);;biological_process:one-carbon metabolic process(GO:0006730);;molecular_function:transferase activity(GO:0016740);;molecular_function:metal ion binding(GO:0046872);;molecular_function:nucleotide binding(GO:0000166);;molecular_function:methion…	Q944U4|METK_DENCR|-54.8|S-adenosylmethionine synthase OS=Dendrobium crumenatum GN=SAMS PE=2 SV=1	4641.GSMUA_Achr8P06200_001|-53.5|COG0192|H|Catalyzes the formation of S-adenosylmethionine from methionine and ATP	PF02772.15|S-AdoMet_synt_M|1.7e-32|S-adenosylmethionine synthetase, central domain
c8103/f1p49/2288	XP_010922712.1|0x1.0255d22223544p-226|PREDICTED: U-box domain-containing protein 16-like [Elaeis guineensis]	-	biological_process:protein ubiquitination(GO:0016567);;molecular_function:transferase activity(GO:0016740)	Q9LZW3|PUB16_ARATH|-22.2|U-box domain-containing protein 16 OS=Arabidopsis thaliana GN=PUB16 PE=2 SV=1	4641.GSMUA_Achr4P00200_001|-66.5|ENOG410XRTN|S|U-box domain-containing protein	-
c147317/f1p6/1704	XP_020587681.1|0x1.32c58ecc32d68p-277|beta-glucosidase 4 isoform X2 [Phalaenopsis equestris]	pda:103706111|-81.2|K01188|E3.2.1.21; beta-glucosidase [EC:3.2.1.21]|ko00940|Phenylpropanoid biosynthesis;;ko00460|Cyanoamino acid metabolism;;ko00500|Starch and sucrose metabolism;;	biological_process:response to bacterium(GO:0009617);;biological_process:induced systemic resistance, ethylene mediated signaling pathway(GO:0009866);;molecular_function:hydrolase activity(GO:0016787);;molecular_function:hydrolase activity, acting on glycosyl bonds(GO:0016798);;biological_process:secondary metabolic process(GO:0019748);;biological_process:positive regulation of defense response(G…	Q9FIW4|BGL42_ARATH|-78.7|Beta-glucosidase 42 OS=Arabidopsis thaliana GN=BGLU42 PE=2 SV=1	3847.GLYMA11G16220.1|-81.0|COG2723|G|beta-glucosidase	PF00232.17|Glyco_hydro_1|8.9e-60|Glycosyl hydrolase family 1
c19216/f1p20/2252	ASY93291.1|0x1.400974c3a9ad9p-156|nucleic acid binding protein [Garlic virus X]_x0001_ASY93293.1 nucleic acid binding protein [Garlic virus X]	-	-	-	-	-
c47088/f1p5/1537	XP_020274186.1|0x1.519437ca159a3p-320|uncharacterized protein LOC109848879 isoform X1 [Asparagus officinalis]_x0001_XP_020274187.1 uncharacterized protein LOC109848879 isoform X1 [Asparagus officinalis]_x0001_ONK62122.1 uncharacterized protein A4U43_C07F580 [Asparagus officinalis]	-	-	-	59689.scaffold_301041.1|-75.3|ENOG4112993|K|Transcription termination factor nusG family protein	-
c63178/f1p7/1202	XP_010935694.1|0x1.91caa352783eap-158|PREDICTED: early light-induced protein 1, chloroplastic isoform X1 [Elaeis guineensis]	-	biological_process:cellular response to high light intensity(GO:0071486);;cellular_component:chloroplast thylakoid membrane(GO:0009535);;biological_process:cellular response to far red light(GO:0071490);;cellular_component:chloroplast thylakoid membrane(GO:0009535);;biological_process:cellular response to red light(GO:0071491);;cellular_component:plastid(GO:0009536);;cellular_component:thylakoid(…	P93735|ELIP1_ARATH|-41.1|Early light-induced protein 1, chloroplastic OS=Arabidopsis thaliana GN=ELIP1 PE=1 SV=1	4641.GSMUA_Achr8P20530_001|-41.3|ENOG410Y0RG|S|early light-induced protein	-
c148394/f1p5/1707	ACL31088.1|0x1.82d2d36b4f528p-142|alliinase, partial [Allium sativum]_x0001_ACL31090.1 alliinase, partial [Allium sativum]_x0001_ACL31106.1 alliinase, partial [Allium sativum]_x0001_ACL31133.1 alliinase, partial [Allium sativum]	-	molecular_function:alliin lyase activity(GO:0047654);;cellular_component:vacuole(GO:0005773);;cellular_component:vacuole(GO:0005773);;molecular_function:lyase activity(GO:0016829)	Q41233|ALLN2_ALLSA|-46.1|Alliin lyase 2 OS=Allium sativum PE=1 SV=1	-	PF04864.12|Alliinase_C|1e-33|Allinase
c216023/f1p50/1770	XP_020246823.1|0x1.bab9f4c43307cp-316|ferric reduction oxidase 8, mitochondrial [Asparagus officinalis]_x0001_ONK58795.1 uncharacterized protein A4U43_C09F16720 [Asparagus officinalis]	-	cellular_component:membrane(GO:0016020);;cellular_component:integral component of membrane(GO:0016021);;molecular_function:oxidoreductase activity(GO:0016491);;molecular_function:metal ion binding(GO:0046872);;biological_process:oxidation-reduction process(GO:0055114);;biological_process:oxidation-reduction process(GO:0055114);;molecular_function:ferric-chelate reductase activity(GO:0000293);;bio…	Q9LMM2|FRO1_ARATH|-30.4|Probable ferric reduction oxidase 1 OS=Arabidopsis thaliana GN=FRO1 PE=2 SV=1	4641.GSMUA_Achr6P28010_001|-43.1|ENOG410XNZY|U|NADPH Oxidase	-
c271162/f1p4/1928	XP_018816338.1|0x1.fbb029a6d35abp-188|PREDICTED: WRKY transcription factor WRKY24-like [Juglans regia]	jcu:105640984|-52.2|K13424|WRKY33; WRKY transcription factor 33|ko04626|Plant-pathogen interaction;;	molecular_function:protein binding(GO:0005515);;cellular_component:nucleus(GO:0005634);;cellular_component:nucleus(GO:0005634);;biological_process:transcription, DNA-templated(GO:0006351);;biological_process:regulation of transcription, DNA-templated(GO:0006355);;biological_process:defense response(GO:0006952);;molecular_function:DNA binding(GO:0003677);;molecular_function:protein binding(GO:0005…	Q8S8P5|WRK33_ARATH|-44.7|Probable WRKY transcription factor 33 OS=Arabidopsis thaliana GN=WRKY33 PE=1 SV=2	4641.GSMUA_Achr6P32720_001|-47.7|ENOG4111DPQ|K|WRKY transcription factor	-
c2069/f1p668/2959	XP_010423744.1|0x1.6aabae18b436dp-695|PREDICTED: polyubiquitin [Camelina sativa]_x0001_XP_020890201.1 polyubiquitin [Arabidopsis lyrata subsp. lyrata]_x0001_OAO94736.1 hypothetical protein AXX17_AT5G02450 [Arabidopsis thaliana]	-	cellular_component:cytoplasm(GO:0005737);;cellular_component:nucleus(GO:0005634);;cellular_component:nucleus(GO:0005634);;cellular_component:cytoplasm(GO:0005737)	P0CH32|UBQ4_ARATH|-212.4|Polyubiquitin 4 OS=Arabidopsis thaliana GN=UBQ4 PE=3 SV=1	59689.fgenesh2_kg.4__1328__AT5G20620.1|-211.2|COG5272|O|ubiquitin	PF00240.22|ubiquitin|2.2e-33|Ubiquitin family
c13998/f1p564/2648	NP_932306.1|0x1.b301051cf5d38p-389|158kDa replicase [Botrytis virus X]_x0001_Q6YNQ7.1 RecName: Full=RNA replication protein; Includes: RecName: Full=RNA-directed RNA polymerase; Includes: RecName: Full=Helicase_x0001_AAL17722.1 158kDa replicase [Botrytis virus X]	-	-	-	-	PF01443.17|Viral_helicase1|1.5e-40|Viral (Superfamily 1) RNA helicase
c218877/f1p14/1718	XP_010278553.1|0x1.c23fb3183aebdp-228|PREDICTED: F-box protein At4g00755 [Nelumbo nucifera]	-	-	Q8LG03|FB345_ARATH|-52.7|F-box protein At4g00755 OS=Arabidopsis thaliana GN=At4g00755 PE=2 SV=1	59689.scaffold_604223.1|-53.4|ENOG4111I2N|S|F-box protein	-
c7583/f1p19/2278	XP_008809035.1|0x1.df3cc1c41bf79p-605|PREDICTED: DExH-box ATP-dependent RNA helicase DExH9 [Phoenix dactylifera]	pda:103720870|-182.7|K12598|MTR4, SKIV2L2; ATP-dependent RNA helicase DOB1 [EC:3.6.4.13]|ko03018|RNA degradation;;	molecular_function:ATP binding(GO:0005524);;cellular_component:nucleus(GO:0005634);;cellular_component:nucleoplasm(GO:0005654);;cellular_component:nucleolus(GO:0005730);;biological_process:rRNA processing(GO:0006364);;molecular_function:hydrolase activity(GO:0016787);;molecular_function:rRNA binding(GO:0019843);;molecular_function:nucleotide binding(GO:0000166);;molecular_function:RNA binding(GO:…	Q9XIF2|MTR4_ARATH|-168.7|DExH-box ATP-dependent RNA helicase DExH9 OS=Arabidopsis thaliana GN=MTR4 PE=2 SV=1	4555.Si005771m|-179.9|COG4581|L|helicase	-
c5468/f7p12/1215	XP_020260963.1|0x1.2059db5ad51e2p-278|B-cell receptor-associated protein 31-like [Asparagus officinalis]_x0001_ONK71902.1 uncharacterized protein A4U43_C04F13550 [Asparagus officinalis]	mus:103969503|-78.5|K14009|BCAP31, BAP31; B-cell receptor-associated protein 31|ko04141|Protein processing in endoplasmic reticulum;;	-	-	4641.GSMUA_Achr10P28990_001|-79.7|COG5374|S|b-cell receptor-associated protein	-
c235509/f1p11/1718	XP_019701405.1|0x1.64d18006bdabep-165|PREDICTED: zinc finger protein-like 1 homolog [Elaeis guineensis]	-	-	-	4533.OB10G15320.1|-46.9|ENOG410ZR2P|S|Zinc finger protein-like 1	-
c38887/f1p65/1795	AKI87756.1|0x1.11f6352f76fe4p-818|alliinase, partial [Allium sativum]	-	molecular_function:alliin lyase activity(GO:0047654);;cellular_component:vacuole(GO:0005773);;cellular_component:vacuole(GO:0005773);;molecular_function:lyase activity(GO:0016829)	Q41233|ALLN2_ALLSA|-248.3|Alliin lyase 2 OS=Allium sativum PE=1 SV=1	29760.VIT_18s0157g00140.t01|-110.4|ENOG410XS9Z|S|tryptophan aminotransferase-related protein 4-like	PF04864.12|Alliinase_C|1.3e-157|Allinase
c5105/f1p5/3925	XP_020263731.1|0x1.aa76400d8b5cdp-560|E3 ubiquitin protein ligase RIN3-like isoform X2 [Asparagus officinalis]_x0001_ONK73779.1 uncharacterized protein A4U43_C04F35280 [Asparagus officinalis]	egu:105054014|-156.2|K10636|AMFR, GP78; autocrine motility factor receptor [EC:2.3.2.27]|ko04141|Protein processing in endoplasmic reticulum;;	cellular_component:membrane(GO:0016020);;cellular_component:membrane(GO:0016020);;cellular_component:integral component of membrane(GO:0016021);;biological_process:protein ubiquitination(GO:0016567);;molecular_function:transferase activity(GO:0016740);;molecular_function:metal ion binding(GO:0046872);;molecular_function:protein binding(GO:0005515);;biological_process:defense response(GO:0006952);…	Q8VYC8|RIN2_ARATH|-89.5|E3 ubiquitin protein ligase RIN2 OS=Arabidopsis thaliana GN=RIN2 PE=1 SV=1	4533.OB07G20500.1|-143.9|COG5243|O|zinc ion binding	-
c23444/f1p124/3284	XP_020240680.1|0x1.e50e97b03c89p-747|probable potassium transporter 11 [Asparagus officinalis]_x0001_XP_020240681.1 probable potassium transporter 11 [Asparagus officinalis]_x0001_XP_020240682.1 probable potassium transporter 11 [Asparagus officinalis]_x0001_XP_020240683.1 probable potassium transporter 11 [Asparagus officinalis]_x0001_XP_020240684.1 probable potassium transporter 11 [Asparagus o…	-	cellular_component:membrane(GO:0016020);;cellular_component:integral component of membrane(GO:0016021);;biological_process:ion transport(GO:0006811);;biological_process:potassium ion transport(GO:0006813);;cellular_component:membrane(GO:0016020)	Q8VXB1|HAK12_ORYSJ|-212.6|Putative potassium transporter 12 OS=Oryza sativa subsp. japonica GN=HAK12 PE=2 SV=1	4641.GSMUA_Achr11P18160_001|-219.3|COG3158|P|Transport of potassium into the cell (By similarity)	PF02705.15|K_trans|9.7e-149|K+ potassium transporter
c30183/f1p18/3509	XP_020415570.1|0x1.232a51ac3349cp-280|zinc finger BED domain-containing protein RICESLEEPER 2 [Prunus persica]	-	-	-	15368.BRADI3G57485.1|-38.0|ENOG4111T8J|S|transposon protein	-
c68871/f1p43/1884	XP_020261653.1|0x1.1a1abde077c5ep-187|26S proteasome non-ATPase regulatory subunit 4 homolog [Asparagus officinalis]_x0001_ONK72636.1 uncharacterized protein A4U43_C04F21460 [Asparagus officinalis]	egu:105055077|-53.4|K03029|PSMD4, RPN10; 26S proteasome regulatory subunit N10|ko03050|Proteasome;;	cellular_component:proteasome complex(GO:0000502);;molecular_function:polyubiquitin modification-dependent protein binding(GO:0031593)	P55034|PSMD4_ARATH|-37.2|26S proteasome non-ATPase regulatory subunit 4 homolog OS=Arabidopsis thaliana GN=RPN10 PE=1 SV=1	4641.GSMUA_Achr4P25580_001|-52.4|COG5148|O|26S proteasome nonATPase regulatory subunit	-
c138498/f3p106/1657	XP_020579344.1|0x1.e2839c8f2d259p-548|clustered mitochondria protein isoform X1 [Phalaenopsis equestris]	-	cellular_component:cytoplasm(GO:0005737);;cellular_component:cytoplasm(GO:0005737)	F4J5S1|CLU_ARATH|-139.0|Clustered mitochondria protein OS=Arabidopsis thaliana GN=FMT PE=2 SV=1	29760.VIT_13s0064g01350.t01|-161.8|ENOG410XQUQ|S|Involved in proper cytoplasmic distribution of mitochondria (By similarity)	-
c9214/f1p11/2166	ONK73420.1|0x0.0e44c7f363959p-1022|uncharacterized protein A4U43_C04F31310 [Asparagus officinalis]	-	-	-	4533.OB03G10110.1|-193.0|COG0566|J|Methyltransferase	-
c3517/f1p18/1427	XP_020265328.1|0x1.c04b4dd5df075p-171|uncharacterized protein LOC109840910 [Asparagus officinalis]_x0001_ONK70094.1 uncharacterized protein A4U43_C05F30200 [Asparagus officinalis]	-	-	-	4641.GSMUA_Achr4P02600_001|-36.9|ENOG410YC9T|S|Plant-specific domain TIGR01615 family protein	PF04720.11|PDDEXK_6|2.9e-56|PDDEXK-like family of unknown function
c13957/f1p80/3165	XP_020273240.1|0x1.bdaadf2ddab21p-853|SNF1-related protein kinase catalytic subunit alpha KIN10-like [Asparagus officinalis]	-	molecular_function:protein binding(GO:0005515);;molecular_function:protein binding(GO:0005515);;molecular_function:protein binding(GO:0005515);;molecular_function:ATP binding(GO:0005524);;biological_process:carbohydrate metabolic process(GO:0005975);;biological_process:lipid metabolic process(GO:0006629);;biological_process:fatty acid metabolic process(GO:0006631);;biological_process:fatty acid b…	Q38997|KIN10_ARATH|-241.7|SNF1-related protein kinase catalytic subunit alpha KIN10 OS=Arabidopsis thaliana GN=KIN10 PE=1 SV=2	3702.AT3G01090.2|-240.5|COG0515|T|Serine Threonine protein kinase	PF00069.24|Pkinase|1.6e-80|Protein kinase domain
c532/f1p262/4105	AKR15675.1|0x1.404702912f099p-453|coat protein [Garlic virus X]_x0001_AKR15677.1 coat protein [Garlic virus X]_x0001_AKR15678.1 coat protein [Garlic virus X]_x0001_AKR15679.1 coat protein [Garlic virus X]_x0001_AKR15680.1 coat protein [Garlic virus X]_x0001_AKR15682.1 coat protein [Garlic virus X]_x0001_ASY93298.1 coat protein [Garlic virus X]_x0001_ASY93300.1 coat protein [Garlic virus X]_x0001_…	-	-	-	-	PF00286.19|Flexi_CP|1.4e-45|Viral coat protein
c1430/f1p64/3337	AAO62313.1|0x1.ede130eee540bp-881|UDP-glucose dehydrogenase [Colocasia esculenta]	egu:105058063|-265.5|K00012|UGDH, ugd; UDPglucose 6-dehydrogenase [EC:1.1.1.22]|ko00040|Pentose and glucuronate interconversions;;ko00520|Amino sugar and nucleotide sugar metabolism;;ko00053|Ascorbate and aldarate metabolism;;ko00500|Starch and sucrose metabolism;;	biological_process:oxidation-reduction process(GO:0055114);;molecular_function:UDP-glucose 6-dehydrogenase activity(GO:0003979);;biological_process:UDP-glucuronate biosynthetic process(GO:0006065);;molecular_function:oxidoreductase activity(GO:0016491)	Q2QS14|UGDH4_ORYSJ|-265.5|UDP-glucose 6-dehydrogenase 4 OS=Oryza sativa subsp. japonica GN=UGD4 PE=2 SV=1	4577.GRMZM2G328500_P01|-264.7|COG1004|M|UDP-glucose 6-dehydrogenase	PF03721.13|UDPG_MGDP_dh_N|1.7e-66|UDP-glucose/GDP-mannose dehydrogenase family, NAD binding domain
c6490/f1p6/1475	XP_020257591.1|0x1.782e01035afb1p-162|uncharacterized protein LOC109834091 [Asparagus officinalis]	-	-	-	3847.GLYMA19G03250.1|-42.7|ENOG4110JQH|S|Domain of unknown function (DUF3598)	-
c23705/f1p13/3276	XP_020260233.1|0x1.2eb60249815a4p-780|methyltransferase-like protein 17, mitochondrial [Asparagus officinalis]_x0001_ONK81826.1 uncharacterized protein A4U43_C01F33260 [Asparagus officinalis]	-	-	-	4641.GSMUA_Achr4P27180_001|-221.9|COG5459|J|37S ribosomal protein RSM22	PF09243.9|Rsm22|7.5e-34|Mitochondrial small ribosomal subunit Rsm22
c23610/f1p44/2105	XP_010917686.1|0x0p+0|PREDICTED: beta-galactosidase 5-like [Elaeis guineensis]	-	molecular_function:hydrolase activity(GO:0016787);;molecular_function:hydrolase activity, acting on glycosyl bonds(GO:0016798);;cellular_component:apoplast(GO:0048046);;cellular_component:apoplast(GO:0048046);;molecular_function:beta-galactosidase activity(GO:0004565);;cellular_component:extracellular region(GO:0005576);;biological_process:metabolic process(GO:0008152)	Q10RB4|BGAL5_ORYSJ|-10000.0|Beta-galactosidase 5 OS=Oryza sativa subsp. japonica GN=Os03g0165400 PE=2 SV=1	4641.GSMUA_Achr9P21610_001|-10000.0|COG1874|G|beta-galactosidase	PF01301.18|Glyco_hydro_35|4.7e-55|Glycosyl hydrolases family 35
c15844/f1p23/2303	ONK70069.1|0x1.701d18a8a4056p-311|uncharacterized protein A4U43_C05F29920 [Asparagus officinalis]	mus:103995784|-94.2|K01874|MARS, metG; methionyl-tRNA synthetase [EC:6.1.1.10]|ko00970|Aminoacyl-tRNA biosynthesis;;ko00450|Selenocompound metabolism;;	molecular_function:aminoacyl-tRNA ligase activity(GO:0004812);;molecular_function:methionine-tRNA ligase activity(GO:0004825);;molecular_function:ATP binding(GO:0005524);;cellular_component:cytoplasm(GO:0005737);;cellular_component:cytoplasm(GO:0005737);;biological_process:translation(GO:0006412);;molecular_function:ligase activity(GO:0016874);;molecular_function:tRNA binding(GO:0000049);;molecul…	Q9ZTS1|SYM_ORYSJ|-89.9|Probable methionine--tRNA ligase OS=Oryza sativa subsp. japonica GN=Os06g0508700 PE=2 SV=2	4641.GSMUA_Achr6P24850_001|-93.2|COG0073|J|Is required not only for elongation of protein synthesis but also for the initiation of all mRNA translation through initiator tRNA(fMet) aminoacylation (By similarity)	PF01588.19|tRNA_bind|1.2e-32|Putative tRNA binding domain
c70585/f1p10/2065	AGG13262.1|0x1.e93b12cf653c4p-125|coat protein [Garlic virus X]	-	-	-	-	-
c70310/f1p9/1630	XP_020243967.1|0x1.509f90380c7afp-296|uncharacterized calcium-binding protein At1g02270-like isoform X1 [Asparagus officinalis]	-	molecular_function:metal ion binding(GO:0046872);;cellular_component:membrane(GO:0016020);;cellular_component:membrane(GO:0016020);;cellular_component:integral component of membrane(GO:0016021)	O81916|YC22_ARATH|-67.0|Uncharacterized calcium-binding protein At1g02270 OS=Arabidopsis thaliana GN=At1g02270 PE=2 SV=2	4641.GSMUA_Achr11P02680_001|-77.7|ENOG410Y9CV|S|calcium-binding protein At1g02270	-
c30336/f1p169/2400	GAY67715.1|0x1.1969f1f1eaa02p-494|hypothetical protein CUMW_258790 [Citrus unshiu]	-	molecular_function:translation elongation factor activity(GO:0003746);;biological_process:translation(GO:0006412);;biological_process:translational elongation(GO:0006414)	Q5Z627|EF1G3_ORYSJ|-151.4|Elongation factor 1-gamma 3 OS=Oryza sativa subsp. japonica GN=Os06g0571400 PE=2 SV=1	39947.LOC_Os06g37440.1|-150.2|COG0625|O|glutathione Stransferase	PF00647.18|EF1G|2.5e-40|Elongation factor 1 gamma, conserved domain
c24438/f1p310/2643	XP_020264925.1|0x1.3fb9119e1c977p-630|ATP-dependent 6-phosphofructokinase 6-like [Asparagus officinalis]_x0001_ONK69784.1 uncharacterized protein A4U43_C05F26680 [Asparagus officinalis]	mus:103980383|-174.1|K00850|pfkA, PFK; 6-phosphofructokinase 1 [EC:2.7.1.11]|ko03018|RNA degradation;;ko00052|Galactose metabolism;;ko01200|Carbon metabolism;;ko01230|Biosynthesis of amino acids;;ko00030|Pentose phosphate pathway;;ko00051|Fructose and mannose metabolism;;ko00010|Glycolysis / Gluconeogenesis;;	molecular_function:ATP binding(GO:0005524);;cellular_component:cytoplasm(GO:0005737);;cellular_component:cytoplasm(GO:0005737);;biological_process:glycolytic process(GO:0006096);;biological_process:glycolytic process(GO:0006096);;biological_process:metabolic process(GO:0008152);;molecular_function:kinase activity(GO:0016301);;biological_process:phosphorylation(GO:0016310);;molecular_function:tran…	Q94AA4|PFKA3_ARATH|-161.2|ATP-dependent 6-phosphofructokinase 3 OS=Arabidopsis thaliana GN=PFK3 PE=1 SV=1	4641.GSMUA_Achr4P01040_001|-175.3|COG0205|G|phosphohexokinase	PF00365.19|PFK|1.2e-54|Phosphofructokinase
c34717/f1p38/3672	XP_020247110.1|0x1.a132ec5b17c08p-865|cationic amino acid transporter 9, chloroplastic [Asparagus officinalis]	-	cellular_component:membrane(GO:0016020);;cellular_component:integral component of membrane(GO:0016021);;cellular_component:chloroplast membrane(GO:0031969);;biological_process:amino acid transport(GO:0006865);;cellular_component:chloroplast(GO:0009507);;cellular_component:plastid(GO:0009536)	Q9C5D6|CAAT9_ARATH|-213.1|Cationic amino acid transporter 9, chloroplastic OS=Arabidopsis thaliana GN=CAT9 PE=2 SV=1	4641.GSMUA_Achr1P04380_001|-231.4|COG0531|E|amino acid	PF13520.5|AA_permease_2|5.4e-52|Amino acid permease
c284461/f2p4/876	XP_020694311.1|0x1.6576463e1def6p-159|protein TIFY 10a-like [Dendrobium catenatum]	mus:103997923|-22.2|K13464|JAZ; jasmonate ZIM domain-containing protein|ko04075|Plant hormone signal transduction;;	-	-	4641.GSMUA_Achr9P14370_001|-23.4|ENOG410ZDCD|S|jasmonate ZIM domain-containing protein	-
c188492/f1p8/1955	ONK65442.1|0x1.b73706aabfa79p-262|uncharacterized protein A4U43_C07F37160 [Asparagus officinalis]	-	biological_process:endomembrane system organization(GO:0010256);;cellular_component:membrane(GO:0016020);;cellular_component:integral component of membrane(GO:0016021);;biological_process:vesicle-mediated transport(GO:0016192);;biological_process:vesicle-mediated transport(GO:0016192);;cellular_component:endoplasmic reticulum(GO:0005783);;cellular_component:endoplasmic reticulum membrane(GO:00057…	Q5XF36|KMS1_ARATH|-68.2|Vacuole membrane protein KMS1 OS=Arabidopsis thaliana GN=KMS1 PE=1 SV=1	4641.GSMUA_Achr3P29660_001|-72.3|ENOG410YCRG|S|SNARE associated Golgi protein	-
c3128/f1p28/3626	ONK79416.1|0x1.42a78aa297408p-624|uncharacterized protein A4U43_C01F6130 [Asparagus officinalis]	-	-	-	4641.GSMUA_Achr10P14120_001|-174.9|ENOG4111MC4|S|NA	-
c26740/f1p8/3135	XP_022767215.1|0x1.8495c25370dd7p-80|cactin [Durio zibethinus]	-	biological_process:RNA splicing(GO:0008380);;cellular_component:nuclear speck(GO:0016607);;cellular_component:nucleus(GO:0005634);;cellular_component:spliceosomal complex(GO:0005681);;biological_process:mRNA processing(GO:0006397)	F4I2J8|CATIN_ARATH|-26.1|Cactin OS=Arabidopsis thaliana GN=CTN PE=1 SV=1	4538.ORGLA03G0342600.1|-25.8|ENOG410XPKF|S|cactin, spliceosome C complex subunit	-
c272424/f1p3/1774	XP_020247419.1|0x1.4649a4bc6598fp-146|formin-like protein 2 isoform X3 [Asparagus officinalis]	-	-	-	3694.POPTR_0005s19980.1|-38.8|COG0457|S|repeat-containing protein	-
c18453/f1p47/2072	XP_020253566.1|0x1.58550a40d10fdp-101|transcription factor ICE1-like [Asparagus officinalis]_x0001_ONK77903.1 uncharacterized protein A4U43_C02F12120 [Asparagus officinalis]	-	cellular_component:nucleus(GO:0005634);;cellular_component:nucleus(GO:0005634);;biological_process:transcription, DNA-templated(GO:0006351);;biological_process:regulation of transcription, DNA-templated(GO:0006355);;biological_process:multicellular organism development(GO:0007275);;molecular_function:DNA binding(GO:0003677);;molecular_function:protein binding(GO:0005515);;molecular_function:prote…	Q9LSE2|ICE1_ARATH|-28.7|Transcription factor ICE1 OS=Arabidopsis thaliana GN=SCRM PE=1 SV=1	3847.GLYMA16G05390.1|-30.6|-|-|-	-
c2494/f1p62/3587	ALP82445.1|0x1.ca675dde927d4p-743|delta 1-pyrroline-5-carboxylate synthase [Lycoris radiata]	egu:105052168|-218.1|K12657|ALDH18A1, P5CS; delta-1-pyrroline-5-carboxylate synthetase [EC:2.7.2.11 1.2.1.41]|ko01230|Biosynthesis of amino acids;;ko00330|Arginine and proline metabolism;;	molecular_function:glutamate-5-semialdehyde dehydrogenase activity(GO:0004350);;molecular_function:ATP binding(GO:0005524);;biological_process:proline biosynthetic process(GO:0006561);;biological_process:metabolic process(GO:0008152);;biological_process:cellular amino acid biosynthetic process(GO:0008652);;molecular_function:kinase activity(GO:0016301);;biological_process:phosphorylation(GO:00163…	O04015|P5CS_ACTDE|-209.6|Delta-1-pyrroline-5-carboxylate synthase OS=Actinidia deliciosa PE=2 SV=1	29760.VIT_13s0019g02360.t01|-213.7|COG0263|E|Catalyzes the transfer of a phosphate group to glutamate to form glutamate 5-phosphate which rapidly cyclizes to 5- oxoproline (By similarity)	-
c7509/f1p11/2377	-	sot:102592377|-18.9|K13420|FLS2; LRR receptor-like serine/threonine-protein kinase FLS2 [EC:2.7.11.1]|ko04626|Plant-pathogen interaction;;	-	-	-	PF07727.13|RVT_2|1.2e-39|Reverse transcriptase (RNA-dependent DNA polymerase)
c91583/f1p54/1277	XP_020250207.1|0x1.5eeeca940905p-123|protein NUCLEAR FUSION DEFECTIVE 4-like [Asparagus officinalis]_x0001_ONK55259.1 uncharacterized protein A4U43_UnF5790 [Asparagus officinalis]	-	-	-	4113.PGSC0003DMT400031414|-35.1|ENOG410Y7MY|S|nodulin family	-
c153576/f1p46/1521	PIA32883.1|0x1.8fa1aae4f2bfep-206|hypothetical protein AQUCO_04300075v1 [Aquilegia coerulea]_x0001_PIA32884.1 hypothetical protein AQUCO_04300075v1 [Aquilegia coerulea]	-	-	-	29760.VIT_18s0001g00510.t01|-60.9|COG1505|E|prolyl oligopeptidase	PF00326.20|Peptidase_S9|7.4e-30|Prolyl oligopeptidase family
c20732/f1p3/1234	XP_020255961.1|0x1.c64d97aa501cep-462|protein FAR1-RELATED SEQUENCE 5-like [Asparagus officinalis]	-	-	-	15368.BRADI4G40020.1|-108.6|ENOG410Y5S3|S|transposon protein	-
c22913/f1p9/2679	XP_020259123.1|0x1.45ac924505054p-518|enhanced ethylene response protein 5, partial [Asparagus officinalis]	-	cellular_component:nucleus(GO:0005634);;cellular_component:nucleus(GO:0005634)	Q8GWE6|EER5_ARATH|-141.5|Enhanced ethylene response protein 5 OS=Arabidopsis thaliana GN=EER5 PE=1 SV=1	29760.VIT_11s0016g02290.t01|-151.9|COG5600|L|PCI domain containing 2	-
c281383/f1p29/1276	XP_020246807.1|0x1.c5dd79b5552b8p-302|LOW QUALITY PROTEIN: oil body-associated protein 1A-like [Asparagus officinalis]	-	cellular_component:lipid droplet(GO:0005811);;cellular_component:lipid droplet(GO:0005811)	Q9ZVY7|OBP1A_ARATH|-80.2|Oil body-associated protein 1A OS=Arabidopsis thaliana GN=OBAP1A PE=2 SV=1	4081.Solyc09g098120.2.1|-83.1|ENOG410XPKS|S|DUF1264 domain protein	PF06884.10|DUF1264|2.5e-67|Protein of unknown function (DUF1264)
c14238/f6p54/1504	XP_008793040.1|0x1.5cf707a289251p-435|PREDICTED: tubby-like F-box protein 1 isoform X1 [Phoenix dactylifera]	-	-	Q94DT9|TLP2_ORYSJ|-61.9|Tubby-like F-box protein 2 OS=Oryza sativa subsp. japonica GN=TULP2 PE=2 SV=1	3847.GLYMA12G35920.1|-129.4|ENOG410XQFT|S|tubby like protein	PF01167.17|Tub|2e-87|Tub family
c24038/f1p10/2720	XP_020265593.1|0.53|CCR4-NOT transcription complex subunit 10-like [Asparagus officinalis]_x0001_ONK70336.1 uncharacterized protein A4U43_C05F32680 [Asparagus officinalis]	zma:100383368|-50.1|K12607|CNOT10; CCR4-NOT transcription complex subunit 10|ko03018|RNA degradation;;	-	-	4577.GRMZM2G102851_P02|-51.4|ENOG410XQQJ|K|Ccr4-NOT transcription complex, subunit	-
c153822/f1p12/1303	XP_020269967.1|0x1.79c2d132f3b46p-377|peroxisomal 2,4-dienoyl-CoA reductase-like [Asparagus officinalis]	egu:105059879|-111.8|K13237|DECR2; peroxisomal 2,4-dienoyl-CoA reductase [EC:1.3.1.34]|ko04146|Peroxisome;;	biological_process:fatty acid metabolic process(GO:0006631);;molecular_function:2,4-dienoyl-CoA reductase (NADPH) activity(GO:0008670);;molecular_function:oxidoreductase activity(GO:0016491);;biological_process:oxidation-reduction process(GO:0055114);;cellular_component:peroxisome(GO:0005777);;cellular_component:peroxisome(GO:0005777);;biological_process:lipid metabolic process(GO:0006629)	Q9LTV6|DECR2_ARATH|-103.3|Peroxisomal 2,4-dienoyl-CoA reductase OS=Arabidopsis thaliana GN=At3g12800 PE=2 SV=1	4641.GSMUA_Achr3P23590_001|-106.9|COG1028|S|Dehydrogenase reductase	PF13561.5|adh_short_C2|8.2e-47|Enoyl-(Acyl carrier protein) reductase
c10954/f4p26/2593	XP_020258081.1|0x1.7c38b02c7ce08p-675|diacylglycerol kinase 1 [Asparagus officinalis]_x0001_ONK76385.1 uncharacterized protein A4U43_C03F27130 [Asparagus officinalis]	pda:103709250|-194.7|K00901|dgkA, DGK; diacylglycerol kinase (ATP) [EC:2.7.1.107]|ko00564|Glycerophospholipid metabolism;;ko04070|Phosphatidylinositol signaling system;;ko00561|Glycerolipid metabolism;;	cellular_component:membrane(GO:0016020);;cellular_component:membrane(GO:0016020);;cellular_component:integral component of membrane(GO:0016021);;molecular_function:kinase activity(GO:0016301);;biological_process:phosphorylation(GO:0016310);;molecular_function:transferase activity(GO:0016740);;molecular_function:metal ion binding(GO:0046872);;molecular_function:nucleotide binding(GO:0000166);;mole…	Q39017|DGK1_ARATH|-188.5|Diacylglycerol kinase 1 OS=Arabidopsis thaliana GN=DGK1 PE=1 SV=2	4641.GSMUA_Achr6P16650_001|-191.8|ENOG410XQVB|I|DiacylGlycerol Kinase	PF00609.18|DAGK_acc|3.5e-56|Diacylglycerol kinase accessory domain
c272221/f1p0/1731	AJY59054.1|0x1.08a24c02decc4p-76|cyclo-DOPA 5-O-glucosyltransferase [Amaranthus tricolor]	-	-	-	3694.POPTR_0001s05400.1|-22.0|COG1819|S|Transferase	-
c14063/f2p3/1034	XP_020246099.1|0x1.58210f1c2b0cfp-339|momilactone A synthase-like isoform X2 [Asparagus officinalis]_x0001_ONK57489.1 uncharacterized protein A4U43_C09F1030 [Asparagus officinalis]	-	molecular_function:oxidoreductase activity(GO:0016491);;biological_process:oxidation-reduction process(GO:0055114)	Q94KL7|SILD_FORIN|-73.4|Secoisolariciresinol dehydrogenase (Fragment) OS=Forsythia intermedia PE=1 SV=1	4113.PGSC0003DMT400072587|-77.0|COG1028|S|Dehydrogenase reductase	PF13561.5|adh_short_C2|3.2e-61|Enoyl-(Acyl carrier protein) reductase
c6785/f1p415/2316	AFV61768.1|0x1.39a327b4790c9p-385|TGB1 protein [Garlic virus X]	-	-	-	-	PF01443.17|Viral_helicase1|6.1e-43|Viral (Superfamily 1) RNA helicase
c22301/f1p28/3151	XP_016197033.1|0x1.4e799f745a78cp-206|twinkle homolog protein, chloroplastic/mitochondrial isoform X2 [Arachis ipaensis]	-	molecular_function:transferase activity(GO:0016740);;molecular_function:nucleotidyltransferase activity(GO:0016779);;molecular_function:metal ion binding(GO:0046872)	F4I6E6|PRIH_ARATH|-36.2|Primase homolog protein OS=Arabidopsis thaliana GN=At1g30660 PE=3 SV=1	29760.VIT_10s0003g05590.t01|-61.5|-|-|-	-
c1840/f1p87/5180	XP_020254790.1|0x1.af2428e82b2e5p-982|WD repeat-containing protein 48 isoform X1 [Asparagus officinalis]_x0001_XP_020254791.1 WD repeat-containing protein 48 isoform X1 [Asparagus officinalis]_x0001_ONK78610.1 uncharacterized protein A4U43_C02F20610 [Asparagus officinalis]	-	-	-	3694.POPTR_0005s04800.1|-278.1|ENOG410XRJ5|S|WD repeat domain 48	PF11816.7|DUF3337|9.9e-30|Domain of unknown function (DUF3337)
c45151/f1p2/979	XP_010939715.1|0x1.63000f727b72ep-272|PREDICTED: purine permease 3-like [Elaeis guineensis]	-	cellular_component:integral component of membrane(GO:0016021);;cellular_component:plasma membrane(GO:0005886);;cellular_component:plasma membrane(GO:0005886);;cellular_component:membrane(GO:0016020)	Q9FZ96|PUP1_ARATH|-66.5|Purine permease 1 OS=Arabidopsis thaliana GN=PUP1 PE=1 SV=1	29760.VIT_18s0001g06950.t01|-82.1|ENOG410Y9BB|U|purine permease	PF16913.4|PUNUT|1.2e-80|Purine nucleobase transmembrane transport
c16331/f1p6/2696	XP_020266088.1|0x1.2876da6b59d9dp-250|NF-X1-type zinc finger protein NFXL2 [Asparagus officinalis]	-	-	-	29760.VIT_13s0067g00920.t01|-69.4|ENOG410XR02|K|Nuclear transcription factor, X-box	-
c25897/f1p9/3019	XP_020242330.1|0x1.74b4ba34f1103p-630|copper-transporting ATPase PAA1, chloroplastic isoform X1 [Asparagus officinalis]	-	biological_process:copper ion transport(GO:0006825);;cellular_component:chloroplast(GO:0009507);;cellular_component:plastid(GO:0009536);;biological_process:photosynthetic electron transport chain(GO:0009767);;cellular_component:membrane(GO:0016020);;cellular_component:integral component of membrane(GO:0016021);;molecular_function:hydrolase activity(GO:0016787);;cellular_component:chloroplast memb…	Q9SZC9|HMA6_ARATH|-109.7|Copper-transporting ATPase PAA1, chloroplastic OS=Arabidopsis thaliana GN=PAA1 PE=1 SV=1	4641.GSMUA_Achr7P12640_001|-166.7|COG2217|P|p-type ATPase	PF00702.25|Hydrolase|3.1e-39|haloacid dehalogenase-like hydrolase
c2621/f1p26/4491	XP_020252505.1|0x1.9b6488476082p-584|scarecrow-like protein 9 [Asparagus officinalis]_x0001_ONK76916.1 uncharacterized protein A4U43_C02F1220 [Asparagus officinalis]	-	biological_process:regulation of transcription, DNA-templated(GO:0006355);;cellular_component:nucleus(GO:0005634);;cellular_component:nucleus(GO:0005634);;biological_process:transcription, DNA-templated(GO:0006351)	O80933|SCL9_ARATH|-131.2|Scarecrow-like protein 9 OS=Arabidopsis thaliana GN=SCL9 PE=2 SV=1	3694.POPTR_0006s08690.1|-147.2|ENOG410YMPH|K|transcription, DNA-dependent	PF03514.13|GRAS|1.4e-109|GRAS domain family
c234727/f1p13/1837	XP_020265053.1|0x1.0407335b12554p-834|uncharacterized protein LOC109840724 [Asparagus officinalis]_x0001_ONK69888.1 uncharacterized protein A4U43_C05F27900 [Asparagus officinalis]	-	-	-	4641.GSMUA_Achr1P25270_001|-229.0|COG5140|O|Ubiquitin fusion degradation protein	PF03152.13|UFD1|5.7e-45|Ubiquitin fusion degradation protein UFD1
c1873/f1p86/3156	XP_020256999.1|0x1.11e99f12707cp-581|protein STRUBBELIG-RECEPTOR FAMILY 6-like [Asparagus officinalis]_x0001_ONK75162.1 uncharacterized protein A4U43_C03F14000 [Asparagus officinalis]	-	cellular_component:membrane(GO:0016020);;cellular_component:integral component of membrane(GO:0016021);;molecular_function:nucleotide binding(GO:0000166);;molecular_function:ATP binding(GO:0005524);;cellular_component:membrane(GO:0016020)	Q9C8M9|SRF6_ARATH|-134.8|Protein STRUBBELIG-RECEPTOR FAMILY 6 OS=Arabidopsis thaliana GN=SRF6 PE=1 SV=1	4641.GSMUA_Achr11P13160_001|-156.6|ENOG410XUXK|S|strubbelig-receptor family	PF07714.16|Pkinase_Tyr|4.3e-40|Protein tyrosine kinase
c18799/f3p2/1559	XP_008809322.1|0x1.3a77d3871110cp-580|PREDICTED: molybdate transporter 2 [Phoenix dactylifera]	-	cellular_component:mitochondrial membrane(GO:0031966);;cellular_component:mitochondrion(GO:0005739);;cellular_component:membrane(GO:0016020);;cellular_component:integral component of membrane(GO:0016021)	Q9SL95|MOT1_ARATH|-136.5|Molybdate transporter 1 OS=Arabidopsis thaliana GN=MOT1 PE=1 SV=1	4113.PGSC0003DMT400014777|-170.0|ENOG410XTGP|P|molybdate ion transmembrane transporter activity	PF16983.4|MFS_MOT1|1.8e-37|Molybdate transporter of MFS superfamily
c38374/f1p41/1035	XP_020267138.1|0x1.6377762ccf537p-197|tropinone reductase homolog At2g29290-like isoform X1 [Asparagus officinalis]	pda:103697345|-59.9|K08081|TR1; tropinone reductase I [EC:1.1.1.206]|ko00960|Tropane, piperidine and pyridine alkaloid biosynthesis;;	molecular_function:oxidoreductase activity(GO:0016491);;biological_process:oxidation-reduction process(GO:0055114)	P0DKI3|TRNH1_ARATH|-55.0|Tropinone reductase homolog At1g07440 OS=Arabidopsis thaliana GN=At1g07440 PE=1 SV=1	4641.GSMUA_Achr9P03430_001|-56.5|COG1028|S|Dehydrogenase reductase	PF00106.24|adh_short|2e-42|short chain dehydrogenase
c28826/f1p105/2629	ONK58792.1|0x1.1555f256809cep-105|uncharacterized protein A4U43_C09F16690 [Asparagus officinalis]	-	-	-	4533.OB02G30000.1|-35.0|ENOG411245W|S|ubiquitin-associated (UBA) TS-N domain-containing protein octicosapeptide Phox Bemp1 (PB1) domain-containing protein	-
c1988/f1p12/4523	XP_002464851.1|0x1.e124dcf626b7ep-885|uncharacterized protein LOC8086269 [Sorghum bicolor]_x0001_XP_021306942.1 uncharacterized protein LOC8086269 [Sorghum bicolor]_x0001_EER91849.1 hypothetical protein SORBI_3001G280100 [Sorghum bicolor]_x0001_KXG38790.1 hypothetical protein SORBI_3001G280100 [Sorghum bicolor]_x0001_OQU92048.1 hypothetical protein SORBI_3001G280100 [Sorghum bicolor]	-	biological_process:cellular response to oxidative stress(GO:0034599);;biological_process:response to oxidative stress(GO:0006979);;biological_process:membrane lipid biosynthetic process(GO:0046467);;cellular_component:chloroplast(GO:0009507);;biological_process:iron ion homeostasis(GO:0055072);;cellular_component:chloroplast thylakoid membrane(GO:0009535);;cellular_component:chloroplast thylakoid…	B9DGY1|AB1K7_ARATH|-2.3|Protein ACTIVITY OF BC1 COMPLEX KINASE 7, chloroplastic OS=Arabidopsis thaliana GN=ABC1K7 PE=1 SV=1	4558.Sb01g027550.1|-268.3|COG0661|S|Required, probably indirectly, for the hydroxylation of 2-octaprenylphenol to 2-octaprenyl-6-hydroxy-phenol, the fourth step in ubiquinone biosynthesis (By similarity)	PF03109.15|ABC1|9.4e-37|ABC1 family
c16055/f1p464/2417	AKI87756.1|0x1.8438f54066036p-358|alliinase, partial [Allium sativum]	-	molecular_function:alliin lyase activity(GO:0047654);;cellular_component:vacuole(GO:0005773);;cellular_component:vacuole(GO:0005773);;molecular_function:lyase activity(GO:0016829)	Q01594|ALLN1_ALLSA|-109.6|Alliin lyase 1 OS=Allium sativum PE=1 SV=1	29760.VIT_18s0157g00140.t01|-44.5|ENOG410XS9Z|S|tryptophan aminotransferase-related protein 4-like	PF04864.12|Alliinase_C|5.5e-38|Allinase
c227/f1p22/4284	XP_020276906.1|0x1.2be3ca0cd67d4p-238|lysine-specific demethylase JMJ25-like isoform X1 [Asparagus officinalis]	-	biological_process:regulation of transcription, DNA-templated(GO:0006355);;molecular_function:oxidoreductase activity(GO:0016491);;biological_process:covalent chromatin modification(GO:0016569);;molecular_function:histone demethylase activity (H3-K9 specific)(GO:0032454);;molecular_function:metal ion binding(GO:0046872);;molecular_function:dioxygenase activity(GO:0051213);;biological_process:oxid…	Q9SSE9|JMJ25_ARATH|-61.2|Lysine-specific demethylase JMJ25 OS=Arabidopsis thaliana GN=JMJ25 PE=1 SV=1	4641.GSMUA_Achr3P14190_001|-67.4|ENOG410XTAA|S|lysine (K)-specific demethylase	-
c32855/f1p33/2162	WP_094029056.1|0x1.e37f604df8302p-234|hypothetical protein [Mycobacterium avium]	-	-	-	4533.OB04G17350.1|-37.6|-|-|-	-
c26184/f1p9/2521	XP_020250721.1|0x1.50101377ef49fp-652|beta-galactosidase isoform X2 [Asparagus officinalis]_x0001_ONK80917.1 uncharacterized protein A4U43_C01F23190 [Asparagus officinalis]	-	molecular_function:hydrolase activity(GO:0016787);;molecular_function:hydrolase activity, acting on glycosyl bonds(GO:0016798);;cellular_component:apoplast(GO:0048046);;cellular_component:apoplast(GO:0048046);;molecular_function:beta-galactosidase activity(GO:0004565);;cellular_component:extracellular region(GO:0005576);;biological_process:metabolic process(GO:0008152)	P45582|BGAL_ASPOF|-197.2|Beta-galactosidase OS=Asparagus officinalis PE=2 SV=1	4558.Sb03g025990.1|-177.3|COG1874|G|beta-galactosidase	-
c9039/f1p11/2394	XP_010904794.1|0x1.2e1461fcb5e76p-359|PREDICTED: protein YIPF5 homolog [Elaeis guineensis]_x0001_XP_010904795.1 PREDICTED: protein YIPF5 homolog [Elaeis guineensis]	-	-	-	4641.GSMUA_Achr5P07320_001|-107.4|COG5080|U|yip1 domain family member	-
c10595/f2p194/2195	XP_020272288.1|0x1.9f35dd6d1e778p-280|cytosolic isocitrate dehydrogenase [NADP] [Asparagus officinalis]	pxb:103956814|-84.3|K00031|IDH1, IDH2, icd; isocitrate dehydrogenase [EC:1.1.1.42]|ko01200|Carbon metabolism;;ko04146|Peroxisome;;ko00020|Citrate cycle (TCA cycle);;ko01210|2-Oxocarboxylic acid metabolism;;ko01230|Biosynthesis of amino acids;;ko00480|Glutathione metabolism;;	biological_process:glyoxylate cycle(GO:0006097);;biological_process:tricarboxylic acid cycle(GO:0006099);;molecular_function:oxidoreductase activity(GO:0016491);;molecular_function:metal ion binding(GO:0046872);;biological_process:oxidation-reduction process(GO:0055114);;molecular_function:isocitrate dehydrogenase (NADP+) activity(GO:0004450);;cellular_component:cytoplasm(GO:0005737);;cellular_co…	P50217|IDHC_SOLTU|-82.0|Isocitrate dehydrogenase [NADP] OS=Solanum tuberosum GN=ICDH-1 PE=2 SV=1	4641.GSMUA_Achr1P05110_001|-84.1|COG0538|C|isocitrate dehydrogenase (NADp)	PF00180.19|Iso_dh|1.9e-29|Isocitrate/isopropylmalate dehydrogenase
c10504/f1p13/2172	OVA18896.1|0x1.2a7b4701cd908p-101|hypothetical protein BVC80_8939g13 [Macleaya cordata]	-	-	-	3847.GLYMA17G08530.2|-21.1|ENOG41124SR|S|expressed protein	-
c188744/f1p187/1850	XP_010906116.1|0x1.c1de8e6f6c7c8p-950|PREDICTED: probable cellulose synthase A catalytic subunit 8 [UDP-forming] [Elaeis guineensis]_x0001_XP_010906117.1 PREDICTED: probable cellulose synthase A catalytic subunit 8 [UDP-forming] [Elaeis guineensis]	-	cellular_component:integral component of membrane(GO:0016021);;molecular_function:transferase activity(GO:0016740);;molecular_function:transferase activity, transferring glycosyl groups(GO:0016757);;molecular_function:cellulose synthase (UDP-forming) activity(GO:0016760);;biological_process:cellulose biosynthetic process(GO:0030244);;molecular_function:metal ion binding(GO:0046872);;biological_pr…	Q84ZN6|CESA8_ORYSJ|-277.4|Probable cellulose synthase A catalytic subunit 8 [UDP-forming] OS=Oryza sativa subsp. japonica GN=CESA8 PE=1 SV=1	4641.GSMUA_Achr1P22920_001|-279.8|COG1215|M|Glycosyl transferase, family 2	PF03552.13|Cellulose_synt|7.8e-197|Cellulose synthase
c40803/f1p2/2535	KYP34377.1|0x1.4a6c5fdc40c08p-172|Retrovirus-related Pol polyprotein from transposon TNT 1-94, partial [Cajanus cajan]	-	-	-	3702.AT4G23160.1|-38.9|COG0515|T|Serine Threonine protein kinase	-
c56513/f1p104/2022	XP_020273993.1|0x1.8de608cf197b1p-565|tubulin alpha-3 chain-like [Asparagus officinalis]_x0001_ONK65478.1 uncharacterized protein A4U43_C07F37520 [Asparagus officinalis]	pda:103723819|-169.8|K07374|TUBA; tubulin alpha|ko04145|Phagosome;;	cellular_component:cytoskeleton(GO:0005856);;cellular_component:cytoskeleton(GO:0005856);;cellular_component:microtubule(GO:0005874);;molecular_function:nucleotide binding(GO:0000166);;molecular_function:GTP binding(GO:0005525);;cellular_component:cytoplasm(GO:0005737)	P28752|TBA1_ORYSJ|-172.3|Tubulin alpha-1 chain OS=Oryza sativa subsp. japonica GN=TUBA1 PE=1 SV=1	4538.ORGLA07G0252800.1|-171.1|COG5023|Z|protein polymerization	PF00091.24|Tubulin|8.1e-68|Tubulin/FtsZ family, GTPase domain
c55676/f3p4/1237	XP_020248501.1|0x1.67086d47e358ep-449|uncharacterized protein LOC109825977 [Asparagus officinalis]_x0001_XP_020248508.1 uncharacterized protein LOC109825977 [Asparagus officinalis]_x0001_ONK80587.1 uncharacterized protein A4U43_C01F19500 [Asparagus officinalis]	-	-	-	4641.GSMUA_Achr10P22080_001|-136.3|ENOG410YF3V|S|harpin-induced protein	-
c1517/f1p107/4219	XP_020253402.1|0x0p+0|exocyst complex component 5-like [Asparagus officinalis]_x0001_ONK77732.1 uncharacterized protein A4U43_C02F9970 [Asparagus officinalis]	-	biological_process:exocytosis(GO:0006887);;biological_process:protein transport(GO:0015031)	Q2QV94|EXOC5_ORYSJ|-308.0|Exocyst complex component 5 OS=Oryza sativa subsp. japonica GN=SEC10 PE=2 SV=1	29760.VIT_15s0046g02200.t01|-311.4|ENOG410XSQQ|U|Exocyst complex component	PF07393.10|Sec10|2.9e-86|Exocyst complex component Sec10
c29462/f3p12/1540	XP_020251931.1|0x1.c6043d2591462p-490|uncharacterized protein LOC109829195 [Asparagus officinalis]_x0001_ONK81576.1 uncharacterized protein A4U43_C01F30720 [Asparagus officinalis]	-	-	-	4641.GSMUA_Achr7P06800_001|-135.1|ENOG410ZX0Y|S|(ribosomal) protein	-
c27588/f1p6/1516	ONK68954.1|0x1.354d52ba87e44p-129|uncharacterized protein A4U43_C05F17770 [Asparagus officinalis]	-	cellular_component:chloroplast(GO:0009507);;cellular_component:chloroplast(GO:0009507);;cellular_component:plastid(GO:0009536);;molecular_function:translation initiation factor activity(GO:0003743);;biological_process:translation(GO:0006412);;biological_process:translational initiation(GO:0006413)	O82234|IF32_ARATH|-33.6|Translation initiation factor IF3-2, chloroplastic OS=Arabidopsis thaliana GN=IF3-2 PE=2 SV=1	4641.GSMUA_Achr11P09880_001|-36.0|COG0290|J|IF-3 binds to the 30S ribosomal subunit and shifts the equilibrum between 70S ribosomes and their 50S and 30S subunits in favor of the free subunits, thus enhancing the availability of 30S subunits on which protein synthesis initiation begins (By similarity)	-
c29733/f1p17/2929	XP_018480614.1|0x1.62f3db026d522p-140|PREDICTED: dihydrofolate synthetase, partial [Raphanus sativus]	pda:103702943|-57.7|K20457|DHFS; dihydrofolate synthase [EC:6.3.2.12]|ko00790|Folate biosynthesis;;	cellular_component:mitochondrial matrix(GO:0005759);;cellular_component:mitochondrial matrix(GO:0005759);;biological_process:one-carbon metabolic process(GO:0006730);;molecular_function:dihydrofolate synthase activity(GO:0008841);;molecular_function:ligase activity(GO:0016874);;biological_process:tetrahydrofolate biosynthetic process(GO:0046654);;molecular_function:metal ion binding(GO:0046872);;…	F4JYE9|DHFS_ARATH|-43.9|Dihydrofolate synthetase OS=Arabidopsis thaliana GN=DHFS PE=1 SV=1	15368.BRADI4G01215.1|-53.8|COG0285|H|Folylpolyglutamate synthase	-
c34478/f1p204/3859	XP_020268811.1|0x1.733388f695821p-527|importin subunit beta-1-like [Asparagus officinalis]_x0001_ONK66378.1 uncharacterized protein A4U43_C06F7140 [Asparagus officinalis]	pda:103718970|-155.3|K14293|KPNB1, IPO1; importin subunit beta-1|ko03013|RNA transport;;	molecular_function:protein binding(GO:0005515);;molecular_function:protein binding(GO:0005515);;molecular_function:protein binding(GO:0005515);;cellular_component:nucleus(GO:0005634);;cellular_component:nucleus(GO:0005634);;cellular_component:cytoplasm(GO:0005737);;cellular_component:cytoplasm(GO:0005737);;biological_process:protein transport(GO:0015031);;molecular_function:protein binding(GO:000…	Q9FJD4|IMB1_ARATH|-140.6|Importin subunit beta-1 OS=Arabidopsis thaliana GN=KPNB1 PE=1 SV=1	4641.GSMUA_Achr3P25220_001|-152.9|COG5215|U|Importin	-
c28913/f1p216/2544	ONK76414.1|0x1.d795075d0d168p-460|uncharacterized protein A4U43_C03F27560 [Asparagus officinalis]	-	cellular_component:integral component of membrane(GO:0016021);;molecular_function:transferase activity(GO:0016740);;molecular_function:transferase activity, transferring glycosyl groups(GO:0016757);;molecular_function:cellulose synthase (UDP-forming) activity(GO:0016760);;biological_process:cellulose biosynthetic process(GO:0030244);;molecular_function:metal ion binding(GO:0046872);;biological_pr…	A2XN66|CESA2_ORYSI|-137.0|Probable cellulose synthase A catalytic subunit 2 [UDP-forming] OS=Oryza sativa subsp. indica GN=CESA2 PE=3 SV=1	15368.BRADI1G04597.1|-136.5|COG1215|M|Glycosyl transferase, family 2	PF03552.13|Cellulose_synt|3.9e-140|Cellulose synthase
c35935/f1p84/3129	XP_019255838.1|0x0p+0|PREDICTED: pre-mRNA-processing-splicing factor 8A isoform X3 [Nicotiana attenuata]	sbi:SORBI_10g004680|-10000.0|K12856|PRPF8, PRP8; pre-mRNA-processing factor 8|ko03040|Spliceosome;;	cellular_component:nucleus(GO:0005634);;cellular_component:nucleus(GO:0005634);;cellular_component:spliceosomal complex(GO:0005681);;biological_process:mRNA processing(GO:0006397);;biological_process:RNA splicing(GO:0008380);;cellular_component:intracellular ribonucleoprotein complex(GO:0030529);;biological_process:mRNA splicing, via spliceosome(GO:0000398);;molecular_function:RNA binding(GO:0003…	Q9SSD2|PRP8A_ARATH|-263.8|Pre-mRNA-processing-splicing factor 8A OS=Arabidopsis thaliana GN=PRP8A PE=1 SV=1	39947.LOC_Os06g07080.1|-10000.0|COG5178|A|PRP8 pre-mRNA processing factor 8 homolog (S. cerevisiae)	PF12134.7|PRP8_domainIV|4e-130|PRP8 domain IV core
c13970/f3p46/1443	XP_020600383.1|0x1.610582de1d027p-532|mitochondrial import receptor subunit TOM40-1 [Phalaenopsis equestris]	-	biological_process:ion transport(GO:0006811);;biological_process:protein transport(GO:0015031);;molecular_function:porin activity(GO:0015288);;cellular_component:membrane(GO:0016020);;cellular_component:integral component of membrane(GO:0016021);;cellular_component:pore complex(GO:0046930);;cellular_component:mitochondrion(GO:0005739);;cellular_component:mitochondrial outer membrane(GO:0005741);;…	Q9LHE5|TO401_ARATH|-118.7|Mitochondrial import receptor subunit TOM40-1 OS=Arabidopsis thaliana GN=TOM40-1 PE=1 SV=3	4641.GSMUA_Achr8P01650_001|-157.0|ENOG410XS2U|O|Translocase of outer mitochondrial membrane 40 homolog	PF01459.21|Porin_3|2.8e-81|Eukaryotic porin
c3258/f1p1376/4023	AFV61767.1|0x0p+0|replicase [Garlic virus X]	-	-	-	-	PF01443.17|Viral_helicase1|7.9e-59|Viral (Superfamily 1) RNA helicase
c4134/f1p675/2538	AIZ68214.1|0x1.928b52a3ddf66p-594|CBL-interacting protein kinase 18-like protein [Ornithogalum longebracteatum]	-	molecular_function:kinase activity(GO:0016301);;biological_process:phosphorylation(GO:0016310);;molecular_function:transferase activity(GO:0016740);;molecular_function:nucleotide binding(GO:0000166);;molecular_function:protein serine/threonine kinase activity(GO:0004674);;molecular_function:ATP binding(GO:0005524)	Q5W736|CIPKI_ORYSJ|-163.4|CBL-interacting protein kinase 18 OS=Oryza sativa subsp. japonica GN=CIPK18 PE=2 SV=1	29760.VIT_08s0058g01040.t01|-167.2|COG0515|T|Serine Threonine protein kinase	PF00069.24|Pkinase|1.7e-76|Protein kinase domain
c116664/f1p2/981	PKA55545.1|0x1.be06c9c43bf68p-91|hypothetical protein AXF42_Ash006747 [Apostasia shenzhenica]	-	biological_process:catabolic autophagy(GO:0006914);;biological_process:protein transport(GO:0015031);;cellular_component:cytoplasmic vesicle(GO:0031410);;molecular_function:protein binding(GO:0005515);;molecular_function:protein binding(GO:0005515);;cellular_component:autophagosome(GO:0005776)	F4K265|AT101_ARATH|-26.9|Autophagy-related protein 101 OS=Arabidopsis thaliana GN=ATG101 PE=1 SV=1	4641.GSMUA_Achr3P16140_001|-26.8|ENOG410XP6A|S|Chromosome 12 open reading frame 44	-
c15526/f1p77/2694	XP_009419159.1|0x1.374c139297311p-488|PREDICTED: thioredoxin reductase NTRB [Musa acuminata subsp. malaccensis]	mus:103999208|-147.7|K00384|trxB; thioredoxin reductase (NADPH) [EC:1.8.1.9]|ko00240|Pyrimidine metabolism;;ko00450|Selenocompound metabolism;;	biological_process:oxidation-reduction process(GO:0055114);;molecular_function:thioredoxin-disulfide reductase activity(GO:0004791);;molecular_function:oxidoreductase activity(GO:0016491);;biological_process:oxidation-reduction process(GO:0055114)	Q6ZFU6|NTRB_ORYSJ|-147.3|Thioredoxin reductase NTRB OS=Oryza sativa subsp. japonica GN=NTRB PE=2 SV=1	4558.Sb10g012990.1|-147.1|COG0492|O|thioredoxin reductase	PF07992.13|Pyr_redox_2|9.7e-45|Pyridine nucleotide-disulphide oxidoreductase
c151042/f1p112/1858	XP_006371813.1|0x1.ef4e0573702fp-210|hypothetical protein POPTR_0018s038902g, partial [Populus trichocarpa]_x0001_ERP49610.1 hypothetical protein POPTR_0018s038902g, partial [Populus trichocarpa]	-	molecular_function:protein binding(GO:0005515);;cellular_component:nucleus(GO:0005634);;cellular_component:nucleus(GO:0005634);;cellular_component:cytoplasm(GO:0005737);;cellular_component:cytoplasm(GO:0005737);;cellular_component:cytoplasm(GO:0005737);;biological_process:transcription, DNA-templated(GO:0006351);;biological_process:regulation of transcription, DNA-templated(GO:0006355);;molecular…	Q9SR13|FLK_ARATH|-53.1|Flowering locus K homology domain OS=Arabidopsis thaliana GN=FLK PE=1 SV=1	3694.POPTR_0018s03890.1|-65.1|ENOG410XNN8|S|mRNA transport	-
c28134/f1p29/3034	XP_020676193.1|0x1.b487469311f9ap-393|two-component response regulator ORR22-like [Dendrobium catenatum]_x0001_XP_020676194.1 two-component response regulator ORR22-like [Dendrobium catenatum]_x0001_PKU79069.1 Two-component response regulator ARR12 [Dendrobium catenatum]	nnu:104603346|-114.9|K14491|ARR-B; two-component response regulator ARR-B family|ko04075|Plant hormone signal transduction;;	cellular_component:nucleus(GO:0005634);;biological_process:transcription, DNA-templated(GO:0006351);;biological_process:regulation of transcription, DNA-templated(GO:0006355);;biological_process:cytokinin-activated signaling pathway(GO:0009736);;biological_process:phosphorelay signal transduction system(GO:0000160);;molecular_function:DNA binding(GO:0003677);;cellular_component:nucleus(GO:0005634)	Q6H805|ORR24_ORYSJ|-106.5|Two-component response regulator ORR24 OS=Oryza sativa subsp. japonica GN=RR24 PE=2 SV=1	4641.GSMUA_Achr2P05130_001|-110.2|COG5641|K|Transcription factor	-
c275270/f1p14/1391	XP_020258151.1|0x1.844d9f3b00968p-516|cryptochrome-1 [Asparagus officinalis]_x0001_ONK74058.1 uncharacterized protein A4U43_C03F2350 [Asparagus officinalis]	pda:103716108|-146.5|K12118|CRY1; cryptochrome 1|ko04712|Circadian rhythm - plant;;	molecular_function:ATP binding(GO:0005524);;molecular_function:ATP binding(GO:0005524);;cellular_component:nucleus(GO:0005634);;cellular_component:nucleus(GO:0005634);;cellular_component:nucleus(GO:0005634);;cellular_component:cytoplasm(GO:0005737);;cellular_component:cytoplasm(GO:0005737);;biological_process:response to blue light(GO:0009637);;biological_process:defense response(GO:0006952);;bio…	Q43125|CRY1_ARATH|-137.4|Cryptochrome-1 OS=Arabidopsis thaliana GN=CRY1 PE=1 SV=2	3694.POPTR_0002s09730.1|-142.2|COG0415|L|deoxyribo-dipyrimidine photolyase	PF03441.13|FAD_binding_7|2.1e-60|FAD binding domain of DNA photolyase
c89047/f1p6/1991	ONK60643.1|0x1.e4f83a8d6dc01p-651|uncharacterized protein A4U43_C08F20990 [Asparagus officinalis]	sot:102584052|-193.4|K13379|RGP, UTM; reversibly glycosylated polypeptide / UDP-arabinopyranose mutase [EC:2.4.1.- 5.4.99.30]|ko00520|Amino sugar and nucleotide sugar metabolism;;	cellular_component:Golgi apparatus(GO:0005794);;cellular_component:Golgi apparatus(GO:0005794);;biological_process:protein glycosylation(GO:0006486);;cellular_component:plasmodesma(GO:0009506);;molecular_function:isomerase activity(GO:0016853);;cellular_component:cell junction(GO:0030054);;biological_process:cellulose biosynthetic process(GO:0030244);;molecular_function:UDP-arabinopyranose mutase…	Q8RU27|RGP2_SOLTU|-194.6|Probable UDP-arabinopyranose mutase 2 OS=Solanum tuberosum GN=UPTG2 PE=1 SV=1	4113.PGSC0003DMT400063316|-194.7|ENOG411144T|O|reversibly glycosylated polypeptide	PF03214.12|RGP|4.1e-176|Reversibly glycosylated polypeptide
c118930/f1p3/1869	ONK70962.1|0x1.4a07522bbaae2p-64|uncharacterized protein A4U43_C04F3300 [Asparagus officinalis]	-	-	-	-	-
c859/f1p39/3985	XP_020256219.1|0x1.34fd0bcd5bdeep-371|uncharacterized protein LOC109833077 [Asparagus officinalis]_x0001_XP_020256220.1 uncharacterized protein LOC109833077 [Asparagus officinalis]_x0001_ONK74435.1 uncharacterized protein A4U43_C03F6180 [Asparagus officinalis]	egu:105046771|-107.5|K12617|PATL1, PAT1; DNA topoisomerase 2-associated protein PAT1|ko03018|RNA degradation;;	-	-	29760.VIT_19s0027g00490.t01|-98.1|ENOG410YXYM|S|expressed protein	-
c191119/f1p0/1654	Q41233.1|0x1.5c647cc9b821dp-582|RecName: Full=Alliin lyase 2; Short=Alliinase-2; AltName: Full=Cysteine sulphoxide lyase 2; Flags: Precursor_x0001_AAB32477.1 alliinase [Allium sativum]	-	molecular_function:alliin lyase activity(GO:0047654);;cellular_component:vacuole(GO:0005773);;cellular_component:vacuole(GO:0005773);;molecular_function:lyase activity(GO:0016829)	Q41233|ALLN2_ALLSA|-178.4|Alliin lyase 2 OS=Allium sativum PE=1 SV=1	29760.VIT_18s0157g00130.t01|-63.0|ENOG410XS9Z|S|tryptophan aminotransferase-related protein 4-like	PF04864.12|Alliinase_C|6.4e-145|Allinase
c8811/f1p71/2389	ONK79609.1|0x1.2b281f9b0c825p-471|uncharacterized protein A4U43_C01F8110 [Asparagus officinalis]	mus:103998753|-131.2|K12860|CDC5L, CDC5, CEF1; pre-mRNA-splicing factor CDC5/CEF1|ko03040|Spliceosome;;	cellular_component:nucleus(GO:0005634);;cellular_component:spliceosomal complex(GO:0005681);;biological_process:DNA repair(GO:0006281);;biological_process:transcription, DNA-templated(GO:0006351);;biological_process:regulation of transcription, DNA-templated(GO:0006355);;biological_process:mRNA processing(GO:0006397);;biological_process:defense response(GO:0006952);;biological_process:cellular re…	P92948|CDC5L_ARATH|-88.4|Cell division cycle 5-like protein OS=Arabidopsis thaliana GN=CDC5 PE=1 SV=2	4641.GSMUA_Achr9P23340_001|-132.5|COG5147|K|Myblike DNAbinding domain containing protein	-
c185611/f1p33/1764	AKI87756.1|0x1.78ce44732c6dbp-750|alliinase, partial [Allium sativum]	-	molecular_function:alliin lyase activity(GO:0047654);;cellular_component:vacuole(GO:0005773);;cellular_component:vacuole(GO:0005773);;molecular_function:lyase activity(GO:0016829)	Q01594|ALLN1_ALLSA|-228.4|Alliin lyase 1 OS=Allium sativum PE=1 SV=1	29760.VIT_18s0157g00140.t01|-108.1|ENOG410XS9Z|S|tryptophan aminotransferase-related protein 4-like	PF04864.12|Alliinase_C|1.1e-157|Allinase
c348361/f1p1/651	XP_008783836.1|0x1.4479e2e697e04p-156|PREDICTED: uncharacterized protein LOC103702956 [Phoenix dactylifera]	pda:103702956|-47.7|K02990|RP-S6, MRPS6, rpsF; small subunit ribosomal protein S6|ko03010|Ribosome;;	-	-	15368.BRADI2G07170.1|-45.1|COG0360|J|Binds together with S18 to 16S ribosomal RNA (By similarity)	-
c10421/f1p802/2520	CTQ87153.1|0x1.be92a9e7f0874p-242|coat protein [Garlic virus X]_x0001_CTQ87154.1 coat protein [Garlic virus X]	-	-	-	-	PF00286.19|Flexi_CP|1.4e-33|Viral coat protein
c194656/f1p28/1199	AAG49551.1|0x1.c10af055ed319p-232|ribosomal protein L17-1 [Poa secunda]	pop:POPTR_0008s17560g|-70.0|K02880|RP-L17e, RPL17; large subunit ribosomal protein L17e|ko03010|Ribosome;;	cellular_component:ribosome(GO:0005840);;cellular_component:intracellular ribonucleoprotein complex(GO:0030529)	P35266|RL171_HORVU|-71.0|60S ribosomal protein L17-1 OS=Hordeum vulgare PE=2 SV=1	3694.POPTR_0008s17560.1|-71.3|COG0091|J|The globular domain of the protein is located near the polypeptide exit tunnel on the outside of the subunit, while an extended beta-hairpin is found that lines the wall of the exit tunnel in the center of the 70S ribosome (By similarity)	PF00237.18|Ribosomal_L22|6.2e-35|Ribosomal protein L22p/L17e
c27279/f1p36/3043	XP_020250588.1|0x1.e3dc6b57349ap-469|uncharacterized WD repeat-containing protein C2A9.03-like isoform X3 [Asparagus officinalis]_x0001_XP_020250589.1 uncharacterized WD repeat-containing protein C2A9.03-like isoform X3 [Asparagus officinalis]	-	-	-	3694.POPTR_0005s16680.1|-131.2|ENOG410Y2CG|S|WD-40 repeat family protein	-
c278703/f1p34/1631	ONK56094.1|0x1.740afc885ab8cp-271|uncharacterized protein A4U43_C10F4070 [Asparagus officinalis]	-	cellular_component:mitochondrion(GO:0005739);;cellular_component:mitochondrion(GO:0005739);;biological_process:translation(GO:0006412);;biological_process:translational elongation(GO:0006414);;molecular_function:nucleotide binding(GO:0000166);;molecular_function:translation elongation factor activity(GO:0003746);;molecular_function:GTP binding(GO:0005525)	Q9ZT91|EFTM_ARATH|-79.5|Elongation factor Tu, mitochondrial OS=Arabidopsis thaliana GN=TUFA PE=1 SV=1	4577.GRMZM2G022269_P01|-81.6|COG0050|J|This protein promotes the GTP-dependent binding of aminoacyl-tRNA to the A-site of ribosomes during protein biosynthesis (By similarity)	-
c67973/f1p11/1375	XP_020274060.1|0x1.2cd9c2465c9cap-164|guanine nucleotide-binding protein subunit beta-like isoform X2 [Asparagus officinalis]_x0001_XP_020274061.1 guanine nucleotide-binding protein subunit beta-like isoform X2 [Asparagus officinalis]	-	cellular_component:plasma membrane(GO:0005886);;biological_process:signal transduction(GO:0007165);;cellular_component:membrane(GO:0016020);;molecular_function:signal transducer activity(GO:0004871);;cellular_component:plasma membrane(GO:0005886);;cellular_component:plasma membrane(GO:0005886)	Q40687|GBB_ORYSJ|-52.3|Guanine nucleotide-binding protein subunit beta OS=Oryza sativa subsp. japonica GN=RGB1 PE=1 SV=1	39947.LOC_Os03g46650.1|-51.1|ENOG410XQUX|S|guanine nucleotide binding protein (G protein), beta	-
c125283/f3p4/908	XP_020275230.1|0x1.d86de9eba2d44p-339|uncharacterized protein LOC109849766 [Asparagus officinalis]	-	-	-	4641.GSMUA_Achr3P05550_001|-97.7|ENOG4111N90|S|NA	-
c26274/f1p130/1958	-	-	-	-	4533.OB03G15810.1|-23.0|-|-|-	-
c1026/f1p138/4102	XP_020277265.1|0x1.ea53926261fd5p-349|endoglucanase 10-like [Asparagus officinalis]_x0001_ONK59710.1 uncharacterized protein A4U43_C08F9570 [Asparagus officinalis]	mus:103980408|-100.6|K01179|E3.2.1.4; endoglucanase [EC:3.2.1.4]|ko00500|Starch and sucrose metabolism;;	molecular_function:cellulase activity(GO:0008810);;cellular_component:membrane(GO:0016020);;cellular_component:membrane(GO:0016020);;cellular_component:integral component of membrane(GO:0016021);;molecular_function:hydrolase activity(GO:0016787);;molecular_function:hydrolase activity, acting on glycosyl bonds(GO:0016798);;biological_process:cellulose catabolic process(GO:0030245);;biological_proc…	Q84R49|GUN10_ORYSJ|-95.3|Endoglucanase 10 OS=Oryza sativa subsp. japonica GN=GLU2 PE=2 SV=1	4641.GSMUA_Achr4P00750_001|-101.9|ENOG410XP0H|U|endoglucanase	PF00759.18|Glyco_hydro_9|2.9e-38|Glycosyl hydrolase family 9
c121665/f1p11/1388	XP_020585321.1|0x1.39367388351f9p-353|uncharacterized protein LOC110027987 [Phalaenopsis equestris]	-	-	-	3847.GLYMA15G01640.3|-48.8|COG0438|M|Glycosyl transferase (Group 1	-
c51492/f1p6/947	XP_002268637.1|0x1.67cafa4e9cf73p-304|PREDICTED: 7-deoxyloganetin glucosyltransferase [Vitis vinifera]_x0001_CAN71907.1 hypothetical protein VITISV_038672 [Vitis vinifera]_x0001_BAS68504.1 UDP-glucose:furaneol glucosyltransferase [Vitis labrusca x Vitis vinifera]	-	molecular_function:transferase activity(GO:0016740);;molecular_function:UDP-glucosyltransferase activity(GO:0035251);;biological_process:(-)-secologanin biosynthetic process(GO:1900994)	F8WLS6|UGT6_CATRO|-88.4|7-deoxyloganetin glucosyltransferase OS=Catharanthus roseus GN=UGT85A23 PE=1 SV=1	29760.VIT_00s0324g00050.t01|-93.4|COG1819|S|Transferase	-
c12033/f1p67/3925	AKR15681.1|0x1.99f0f4148f834p-361|coat protein [Garlic virus X]	-	-	-	-	PF00286.19|Flexi_CP|9e-46|Viral coat protein
c2602/f1p66/4286	XP_019707854.1|0x0p+0|PREDICTED: proteasome activator subunit 4 isoform X2 [Elaeis guineensis]	egu:105049914|-10000.0|K06699|PSME4; proteasome activator subunit 4|ko03050|Proteasome;;	cellular_component:proteasome complex(GO:0000502);;biological_process:DNA repair(GO:0006281);;biological_process:cellular response to DNA damage stimulus(GO:0006974)	F4JC97|PSME4_ARATH|-55.8|Proteasome activator subunit 4 OS=Arabidopsis thaliana GN=PA200 PE=2 SV=2	4533.OB06G20670.1|-10000.0|ENOG410XP7J|O|Proteasome (Prosome, macropain) activator subunit 4	-
c25885/f1p1/1968	XP_020275363.1|0x1.5c38ad5229ed7p-123|E3 ubiquitin protein ligase DRIP2-like isoform X1 [Asparagus officinalis]_x0001_XP_020275364.1 E3 ubiquitin protein ligase DRIP2-like isoform X2 [Asparagus officinalis]	-	molecular_function:transferase activity(GO:0016740);;molecular_function:metal ion binding(GO:0046872);;biological_process:protein autoubiquitination(GO:0051865);;molecular_function:protein binding(GO:0005515);;biological_process:protein ubiquitination(GO:0016567);;biological_process:protein ubiquitination(GO:0016567)	Q94AY3|DRIP2_ARATH|-25.1|E3 ubiquitin protein ligase DRIP2 OS=Arabidopsis thaliana GN=DRIP2 PE=1 SV=1	3694.POPTR_0013s03930.1|-32.0|ENOG410XPCN|S|Polycomb group ring finger	-
c17165/f1p42/3653	XP_020254413.1|0x1.a9289eecca5f9p-775|glycine--tRNA ligase, mitochondrial 1 [Asparagus officinalis]	mus:103980470|-223.3|K01880|GARS, glyS1; glycyl-tRNA synthetase [EC:6.1.1.14]|ko00970|Aminoacyl-tRNA biosynthesis;;	molecular_function:glycine-tRNA ligase activity(GO:0004820);;molecular_function:ATP binding(GO:0005524);;cellular_component:cytoplasm(GO:0005737);;cellular_component:mitochondrion(GO:0005739);;cellular_component:mitochondrion(GO:0005739);;cellular_component:cytosol(GO:0005829);;biological_process:translation(GO:0006412);;biological_process:diadenosine tetraphosphate biosynthetic process(GO:001596…	O23627|SYGM1_ARATH|-220.8|Glycine--tRNA ligase, mitochondrial 1 OS=Arabidopsis thaliana GN=At1g29880 PE=1 SV=1	4538.ORGLA04G0080700.1|-223.6|COG0423|J|Catalyzes the attachment of glycine to tRNA(Gly) (By similarity)	-
c267303/f1p17/1977	XP_020251397.1|0x1.b1d1b6a477929p-416|uncharacterized protein LOC109828842 [Asparagus officinalis]_x0001_ONK81137.1 uncharacterized protein A4U43_C01F25690 [Asparagus officinalis]	-	-	-	4641.GSMUA_Achr6P05620_001|-113.9|ENOG410YE2A|S|Protein of unknown function (DUF616)	PF04765.12|DUF616|8.1e-89|Protein of unknown function (DUF616)
c4103/f3p11/1354	BAV92747.1|0x1.db5ef4fe153dfp-476|nuclear matrix constituent protein 2 [Allium cepa]	-	-	-	4641.GSMUA_Achr6P31730_001|-117.0|ENOG410YA8H|S|nuclear matrix constituent protein 1-like	-
c1492/f1p64/2834	XP_020253707.1|0x1.aec4336a1324bp-709|methionine aminopeptidase 2B-like [Asparagus officinalis]	-	biological_process:proteolysis(GO:0006508);;molecular_function:peptidase activity(GO:0008233);;molecular_function:hydrolase activity(GO:0016787);;molecular_function:metal ion binding(GO:0046872);;molecular_function:aminopeptidase activity(GO:0004177);;cellular_component:cytoplasm(GO:0005737);;cellular_component:cytoplasm(GO:0005737)	Q56Y85|MAP22_ARATH|-200.0|Methionine aminopeptidase 2B OS=Arabidopsis thaliana GN=MAP2B PE=2 SV=2	4641.GSMUA_Achr6P19220_001|-203.3|COG0024|J|Removes the N-terminal methionine from nascent proteins (By similarity)	PF00557.23|Peptidase_M24|6.6e-41|Metallopeptidase family M24
c186709/f1p2/1730	-	-	-	-	4641.GSMUA_Achr6P12970_001|-25.5|ENOG410XQS3|S|AHNAK nucleoprotein	-
c39750/f2p34/2055	XP_020241398.1|0x1.2f61cb2ade62cp-801|galactoside 2-alpha-L-fucosyltransferase-like [Asparagus officinalis]_x0001_ONK60866.1 uncharacterized protein A4U43_C08F23530 [Asparagus officinalis]	-	molecular_function:protein binding(GO:0005515);;molecular_function:protein binding(GO:0005515);;molecular_function:protein binding(GO:0005515);;cellular_component:Golgi apparatus(GO:0005794);;cellular_component:membrane(GO:0016020);;cellular_component:integral component of membrane(GO:0016021);;molecular_function:transferase activity(GO:0016740);;molecular_function:transferase activity, transferr…	Q9SWH5|FUT1_ARATH|-183.2|Galactoside 2-alpha-L-fucosyltransferase OS=Arabidopsis thaliana GN=FUT1 PE=1 SV=2	29760.VIT_17s0000g06440.t01|-187.8|ENOG410XXHE|O|fucosyltransferase	PF03254.12|XG_FTase|2.9e-204|Xyloglucan fucosyltransferase
c24042/f1p14/3748	XP_020254837.1|0x1.43d039757d233p-285|sucrose nonfermenting 4-like protein isoform X1 [Asparagus officinalis]	-	molecular_function:protein binding(GO:0005515);;molecular_function:protein binding(GO:0005515);;cellular_component:nucleus(GO:0005634);;cellular_component:nucleus(GO:0005634);;cellular_component:cytoplasm(GO:0005737);;cellular_component:cytoplasm(GO:0005737);;biological_process:carbohydrate metabolic process(GO:0005975);;molecular_function:protein binding(GO:0005515);;molecular_function:protein b…	Q944A6|SNF4_ARATH|-70.3|Sucrose nonfermenting 4-like protein OS=Arabidopsis thaliana GN=SNF4 PE=1 SV=1	4641.GSMUA_Achr2P01600_001|-81.8|COG0517|S|Catalyzes the conversion of inosine 5'-phosphate (IMP) to xanthosine 5'-phosphate (XMP), the first committed and rate- limiting step in the de novo synthesis of guanine nucleotides, and therefore plays an important role in the regulation of cell growth (By similarity)	-
c35455/f1p1/3241	XP_008811540.1|0x1.dff9eec154f7ep-553|PREDICTED: C2 domain-containing protein At1g53590-like isoform X1 [Phoenix dactylifera]	-	cellular_component:membrane(GO:0016020);;cellular_component:membrane(GO:0016020);;cellular_component:integral component of membrane(GO:0016021)	Q93XX4|C2D61_ARATH|4.3|C2 domain-containing protein At1g53590 OS=Arabidopsis thaliana GN=NTMC2T6.1 PE=1 SV=2	29760.VIT_19s0138g00140.t01|-158.7|COG5038|S|Domain-Containing protein	-
c8382/f1p13/1844	XP_020245739.1|0x1.92eb2f5977d88p-154|serine/threonine-protein kinase AFC2 isoform X2 [Asparagus officinalis]	-	molecular_function:protein binding(GO:0005515);;molecular_function:protein binding(GO:0005515);;molecular_function:ATP binding(GO:0005524);;molecular_function:kinase activity(GO:0016301);;biological_process:phosphorylation(GO:0016310);;molecular_function:transferase activity(GO:0016740);;molecular_function:nucleotide binding(GO:0000166);;molecular_function:protein serine/threonine kinase activity…	P51567|AFC2_ARATH|-37.5|Serine/threonine-protein kinase AFC2 OS=Arabidopsis thaliana GN=AFC2 PE=1 SV=1	4641.GSMUA_Achr11P26590_001|-41.6|ENOG410XQF2|T|CDC-like kinase	-
c28345/f1p14/3825	XP_020265214.1|0x1.e0b99a1f65a5dp-871|K(+) efflux antiporter 6-like isoform X2 [Asparagus officinalis]_x0001_ONK70010.1 uncharacterized protein A4U43_C05F29270 [Asparagus officinalis]	-	cellular_component:membrane(GO:0016020);;cellular_component:membrane(GO:0016020);;cellular_component:integral component of membrane(GO:0016021);;biological_process:ion transport(GO:0006811);;biological_process:potassium ion transport(GO:0006813);;molecular_function:antiporter activity(GO:0015297)	Q9ZUN3|KEA4_ARATH|-236.6|K(+) efflux antiporter 4 OS=Arabidopsis thaliana GN=KEA4 PE=2 SV=2	4641.GSMUA_Achr10P27920_001|-255.8|COG0475|P|Sodium hydrogen exchanger	PF00999.20|Na_H_Exchanger|6.3e-73|Sodium/hydrogen exchanger family
c268215/f1p28/1743	OAE33020.1|0x1.cbd9761c111d2p-391|hypothetical protein AXG93_1913s1220 [Marchantia polymorpha subsp. ruderalis]	-	molecular_function:protein binding(GO:0005515);;molecular_function:protein binding(GO:0005515);;molecular_function:ATP binding(GO:0005524);;cellular_component:nucleus(GO:0005634);;cellular_component:nucleus(GO:0005634);;biological_process:mRNA processing(GO:0006397);;biological_process:RNA splicing(GO:0008380);;molecular_function:hydrolase activity(GO:0016787);;biological_process:mRNA transport(G…	Q9LFN6|RH56_ARATH|-120.3|DEAD-box ATP-dependent RNA helicase 56 OS=Arabidopsis thaliana GN=RH56 PE=1 SV=2	4555.Si025481m|-119.2|COG0513|L|purine NTP-dependent helicase activity	-
c400/f1p18/4149	XP_020261739.1|0x1.fc40e83c1b1ap-589|arabinosyltransferase XEG113 [Asparagus officinalis]	-	cellular_component:integral component of membrane(GO:0016021);;molecular_function:transferase activity(GO:0016740);;molecular_function:transferase activity, transferring glycosyl groups(GO:0016757);;biological_process:cell wall organization(GO:0071555);;cellular_component:Golgi membrane(GO:0000139);;cellular_component:Golgi apparatus(GO:0005794);;cellular_component:membrane(GO:0016020)	Q8VXZ5|XG113_ARATH|-153.8|Arabinosyltransferase XEG113 OS=Arabidopsis thaliana GN=XEG113 PE=2 SV=1	3694.POPTR_0004s24390.1|-159.6|ENOG410ZPDM|S|Nucleotide-diphospho-sugar transferase	-
c1668/f1p78/5019	XP_020265889.1|0x0p+0|coatomer subunit beta-1-like [Asparagus officinalis]_x0001_XP_020265890.1 coatomer subunit beta-1-like [Asparagus officinalis]	-	cellular_component:Golgi apparatus(GO:0005794);;biological_process:protein transport(GO:0015031);;cellular_component:membrane(GO:0016020);;biological_process:vesicle-mediated transport(GO:0016192);;cellular_component:COPI-coated vesicle membrane(GO:0030663);;cellular_component:cytoplasmic vesicle(GO:0031410);;cellular_component:Golgi membrane(GO:0000139);;cellular_component:cytoplasm(GO:0005737);…	Q53PC7|COPB1_ORYSJ|-10000.0|Coatomer subunit beta-1 OS=Oryza sativa subsp. japonica GN=Os11g0174000 PE=2 SV=1	29760.VIT_04s0008g02320.t01|-10000.0|COG5096|U|The coatomer is a cytosolic protein complex that binds to dilysine motifs and reversibly associates with Golgi non- clathrin-coated vesicles, which further mediate biosynthetic protein transport from the ER, via the Golgi up to the trans Golgi network. Coatomer complex is required for budding from Golgi membranes, and is essential for the retrograde …	PF01602.19|Adaptin_N|3.7e-74|Adaptin N terminal region
c36582/f1p11/1303	XP_020260431.1|0x1.237c5b4546ca1p-362|serine/threonine-protein kinase ATG1t isoform X4 [Asparagus officinalis]	-	cellular_component:autophagosome(GO:0005776);;biological_process:catabolic autophagy(GO:0006914);;biological_process:protein transport(GO:0015031);;molecular_function:kinase activity(GO:0016301);;biological_process:phosphorylation(GO:0016310);;molecular_function:transferase activity(GO:0016740);;cellular_component:cytoplasmic vesicle(GO:0031410);;molecular_function:nucleotide binding(GO:0000166);…	F4I1N8|ATG1T_ARATH|-75.5|Serine/threonine-protein kinase ATG1t OS=Arabidopsis thaliana GN=At1g49180 PE=2 SV=1	4641.GSMUA_Achr5P01040_001|-95.7|ENOG410XR01|T|Unc51-like kinase	PF00069.24|Pkinase|1e-62|Protein kinase domain
c25164/f1p18/2216	XP_020274960.1|0x1.efd79b3f76ee9p-834|DEAD-box ATP-dependent RNA helicase 17 [Asparagus officinalis]_x0001_ONK62226.1 uncharacterized protein A4U43_C07F1670 [Asparagus officinalis]	-	molecular_function:ATP binding(GO:0005524);;cellular_component:nucleus(GO:0005634);;cellular_component:nucleus(GO:0005634);;molecular_function:hydrolase activity(GO:0016787);;biological_process:ribosome biogenesis(GO:0042254);;molecular_function:nucleotide binding(GO:0000166);;molecular_function:RNA binding(GO:0003723);;molecular_function:helicase activity(GO:0004386)	Q0DLB9|RH17_ORYSJ|-116.4|DEAD-box ATP-dependent RNA helicase 17 OS=Oryza sativa subsp. japonica GN=RH17 PE=2 SV=2	4113.PGSC0003DMT400006154|-219.3|ENOG410XNT7|L|atp-dependent rna helicase	PF00270.28|DEAD|8.3e-41|DEAD/DEAH box helicase
c44/f1p7/4419	XP_020096153.1|0x1.943cff73b3ca6p-521|probable methyltransferase PMT28 [Ananas comosus]	-	cellular_component:membrane(GO:0016020);;cellular_component:integral component of membrane(GO:0016021);;molecular_function:transferase activity(GO:0016740);;biological_process:methylation(GO:0032259);;cellular_component:Golgi membrane(GO:0000139);;cellular_component:Golgi apparatus(GO:0005794);;molecular_function:methyltransferase activity(GO:0008168)	Q9LN50|PMTS_ARATH|-140.3|Probable methyltransferase PMT28 OS=Arabidopsis thaliana GN=At1g19430 PE=2 SV=1	4641.GSMUA_Achr6P05660_001|-154.1|ENOG410YFD2|S|Pfam:DUF248	PF03141.15|Methyltransf_29|8.6e-124|Putative S-adenosyl-L-methionine-dependent methyltransferase
c29/f1p131/9991	XP_020270348.1|0x1.d260f749143e6p-836|tubulin alpha-3 chain [Asparagus officinalis]_x0001_ONK66621.1 uncharacterized protein A4U43_C06F10260 [Asparagus officinalis]	vvi:100260286|-250.9|K07374|TUBA; tubulin alpha|ko04145|Phagosome;;	cellular_component:cytoskeleton(GO:0005856);;cellular_component:cytoskeleton(GO:0005856);;cellular_component:microtubule(GO:0005874);;molecular_function:nucleotide binding(GO:0000166);;molecular_function:GTP binding(GO:0005525);;cellular_component:cytoplasm(GO:0005737)	Q56WH1|TBA3_ARATH|-252.3|Tubulin alpha-3 chain OS=Arabidopsis thaliana GN=TUBA3 PE=1 SV=2	29760.VIT_06s0004g00480.t01|-252.1|COG5023|Z|protein polymerization	PF00091.24|Tubulin|1.7e-66|Tubulin/FtsZ family, GTPase domain
c218991/f1p5/1650	XP_010249647.1|0x1.0eb10501bf10ep-247|PREDICTED: transcription factor bHLH68-like [Nelumbo nucifera]	-	biological_process:transcription, DNA-templated(GO:0006351);;biological_process:regulation of transcription, DNA-templated(GO:0006355);;molecular_function:DNA binding(GO:0003677);;cellular_component:nucleus(GO:0005634);;cellular_component:nucleus(GO:0005634)	Q8S3D1|BH068_ARATH|-48.8|Transcription factor bHLH68 OS=Arabidopsis thaliana GN=BHLH68 PE=1 SV=2	29760.VIT_11s0016g03560.t01|-72.3|ENOG410YDA0|K|Transcription factor	-
c190732/f1p24/1678	XP_020252552.1|0x1.80ed6cdf7417ep-773|uncharacterized protein LOC109829884 [Asparagus officinalis]_x0001_ONK76947.1 uncharacterized protein A4U43_C02F1550 [Asparagus officinalis]	-	-	-	4641.GSMUA_Achr10P26680_001|-198.9|ENOG4110EQU|S|SLT1 protein	-
c34316/f1p43/2737	XP_020251892.1|0x1.3a471a74e01cbp-288|alpha-xylosidase 1-like [Asparagus officinalis]_x0001_ONK81522.1 uncharacterized protein A4U43_C01F30100 [Asparagus officinalis]	-	cellular_component:cell wall(GO:0005618);;biological_process:carbohydrate metabolic process(GO:0005975);;biological_process:metabolic process(GO:0008152);;molecular_function:hydrolase activity(GO:0016787);;molecular_function:hydrolase activity, acting on glycosyl bonds(GO:0016798);;cellular_component:apoplast(GO:0048046);;cellular_component:apoplast(GO:0048046);;molecular_function:alpha-D-xylosid…	Q9S7Y7|XYL1_ARATH|-51.4|Alpha-xylosidase 1 OS=Arabidopsis thaliana GN=XYL1 PE=1 SV=1	4081.Solyc05g009470.2.1|-69.2|COG1501|G|hydrolase, family 31	-
c2405/f1p55/2937	-	-	-	-	4641.GSMUA_Achr4P24550_001|-20.7|ENOG410YER7|S|zinc finger, C3HC4 type domain containing protein, expressed	-
c93151/f1p50/1890	XP_020264571.1|0x1.3a0f5dacb3ad3p-233|nucleobase-ascorbate transporter 6-like [Asparagus officinalis]_x0001_ONK69512.1 uncharacterized protein A4U43_C05F23760 [Asparagus officinalis]	-	cellular_component:integral component of membrane(GO:0016021);;cellular_component:plasma membrane(GO:0005886);;cellular_component:plasma membrane(GO:0005886);;cellular_component:membrane(GO:0016020)	Q0WPE9|NAT7_ARATH|-66.4|Nucleobase-ascorbate transporter 7 OS=Arabidopsis thaliana GN=NAT7 PE=2 SV=2	4641.GSMUA_Achr9P14510_001|-71.3|COG2233|F|permease	-
c148682/f1p101/1739	ONK76623.1|0x1.c395e62003887p-590|uncharacterized protein A4U43_C03F30260 [Asparagus officinalis]	-	-	Q8VZM1|NAA15_ARATH|-149.7|N-terminal acetyltransferase A complex auxiliary subunit NAA15 OS=Arabidopsis thaliana GN=NAA15 PE=1 SV=1	4641.GSMUA_Achr9P02970_001|-164.6|ENOG410XR7D|S|NatA auxiliary subunit	PF12569.7|NARP1|2.1e-144|NMDA receptor-regulated protein 1
c26289/f1p8/3103	KDO55989.1|0x1.ab9ee4f4b2dfcp-82|hypothetical protein CISIN_1g0083482mg, partial [Citrus sinensis]	egu:105041866|-44.6|K07466|RFA1, RPA1, rpa; replication factor A1|ko03430|Mismatch repair;;ko03030|DNA replication;;ko03440|Homologous recombination;;ko03420|Nucleotide excision repair;;	-	-	4641.GSMUA_Achr3P07930_001|-39.6|COG0545|O|Peptidyl-prolyl cis-trans isomerase	-
c181898/f1p4/2019	XP_020241427.1|0x1.6dbee23a61acap-133|probable serine/threonine-protein kinase WNK1 isoform X1 [Asparagus officinalis]	-	molecular_function:kinase activity(GO:0016301);;biological_process:phosphorylation(GO:0016310);;molecular_function:transferase activity(GO:0016740);;molecular_function:nucleotide binding(GO:0000166);;molecular_function:protein serine/threonine kinase activity(GO:0004674);;molecular_function:ATP binding(GO:0005524)	Q0D598|WNK1_ORYSJ|-36.9|Probable serine/threonine-protein kinase WNK1 OS=Oryza sativa subsp. japonica GN=WNK1 PE=2 SV=1	4081.Solyc01g097840.2.1|-37.1|ENOG410XQWZ|T|WNK lysine deficient protein kinase	-
c24/f1p1779/8027	OHT03579.1|0x1.7d774734ca287p-712|hypothetical protein TRFO_29010 [Tritrichomonas foetus]	-	-	-	4533.OB04G17350.1|3.4|-|-|-	-
c2521/f1p29/2714	XP_020594168.1|0x1.c92c57bcecc7dp-196|cellulose synthase A catalytic subunit 7 [UDP-forming]-like, partial [Phalaenopsis equestris]	-	cellular_component:membrane(GO:0016020);;cellular_component:integral component of membrane(GO:0016021);;molecular_function:transferase activity(GO:0016740);;molecular_function:transferase activity, transferring glycosyl groups(GO:0016757);;molecular_function:cellulose synthase (UDP-forming) activity(GO:0016760);;biological_process:cellulose biosynthetic process(GO:0030244);;biological_process:cel…	Q5JN63|CESA4_ORYSJ|-55.9|Cellulose synthase A catalytic subunit 4 [UDP-forming] OS=Oryza sativa subsp. japonica GN=CESA4 PE=2 SV=1	4641.GSMUA_Achr6P31810_001|-55.4|COG1215|M|Glycosyl transferase, family 2	PF03552.13|Cellulose_synt|6.3e-68|Cellulose synthase
c35912/f1p0/3276	XP_020259949.1|0x1.3892ed38c2c95p-474|pentatricopeptide repeat-containing protein At3g57430, chloroplastic-like [Asparagus officinalis]_x0001_XP_020259950.1 pentatricopeptide repeat-containing protein At3g57430, chloroplastic-like [Asparagus officinalis]_x0001_XP_020259951.1 pentatricopeptide repeat-containing protein At3g57430, chloroplastic-like [Asparagus officinalis]_x0001_XP_020259952.1 pent…	-	-	-	29760.VIT_05s0049g02300.t01|-102.1|ENOG410Z7Z7|S|Pentatricopeptide repeat-containing protein	-
c22600/f1p253/3151	XP_009399440.1|0x1.272ccf6862f3p-202|PREDICTED: uncharacterized protein LOC103983853 [Musa acuminata subsp. malaccensis]_x0001_XP_009399441.1 PREDICTED: uncharacterized protein LOC103983853 [Musa acuminata subsp. malaccensis]	pda:103713033|-62.9|K10666|RNF5; E3 ubiquitin-protein ligase RNF5 [EC:2.3.2.27]|ko04141|Protein processing in endoplasmic reticulum;;	-	-	4641.GSMUA_Achr5P03750_001|-62.9|ENOG4111IHV|O|Ring finger protein	-
c30666/f1p59/2588	ARJ62683.1|0x1.fccd1b3cdb0e6p-343|hypothetical chloroplast RF19 (plastid) [Allium sativum]	-	cellular_component:chloroplast inner membrane(GO:0009706);;biological_process:protein transport(GO:0015031);;cellular_component:membrane(GO:0016020);;cellular_component:integral component of membrane(GO:0016021);;cellular_component:chloroplast(GO:0009507);;cellular_component:plastid inner membrane(GO:0009528);;cellular_component:plastid(GO:0009536)	A6MN03|TI214_ILLOL|-70.9|Protein TIC 214 OS=Illicium oligandrum GN=TIC214 PE=3 SV=1	29760.VIT_09s0054g00520.t01|-55.1|ENOG4112D2K|S|Its presence in a non-photosynthetic plant (Epifagus virginiana) and experiments in tobacco indicate that it may have a function which is probably not related to photosynthesis	PF05758.11|Ycf1|6.3e-59|Ycf1
c69686/f1p7/2274	XP_020265939.1|0x1.94c28bebb10cap-177|protein AIR1 [Asparagus officinalis]	-	-	-	15368.BRADI4G15700.1|-40.0|COG5082|OU|zinc finger	-
c40274/f1p18/3702	XP_020256864.1|0x1.225732f4edb0dp-1004|sodium/hydrogen exchanger 8 [Asparagus officinalis]_x0001_ONK75034.1 uncharacterized protein A4U43_C03F12640 [Asparagus officinalis]	-	biological_process:sodium ion transport(GO:0006814);;molecular_function:antiporter activity(GO:0015297);;cellular_component:membrane(GO:0016020);;cellular_component:integral component of membrane(GO:0016021);;cellular_component:plasma membrane(GO:0005886);;cellular_component:plasma membrane(GO:0005886);;biological_process:ion transport(GO:0006811)	Q9LKW9|NHX7_ARATH|-205.4|Sodium/hydrogen exchanger 7 OS=Arabidopsis thaliana GN=NHX7 PE=1 SV=1	4113.PGSC0003DMT400058653|-212.1|COG0025|P|Sodium hydrogen exchanger	-
c1228/f1p56/2485	XP_021308588.1|0x1.653187191a13cp-876|NADH dehydrogenase [ubiquinone] flavoprotein 1, mitochondrial [Sorghum bicolor]_x0001_KXG36814.1 hypothetical protein SORBI_3002G396700 [Sorghum bicolor]	zma:100273176|-263.5|K03942|NDUFV1; NADH dehydrogenase (ubiquinone) flavoprotein 1 [EC:1.6.5.3 1.6.99.3]|ko00190|Oxidative phosphorylation;;	cellular_component:mitochondrial inner membrane(GO:0005743);;molecular_function:NADH dehydrogenase (ubiquinone) activity(GO:0008137);;cellular_component:membrane(GO:0016020);;molecular_function:oxidoreductase activity(GO:0016491);;molecular_function:metal ion binding(GO:0046872);;molecular_function:iron-sulfur cluster binding(GO:0051536);;molecular_function:4 iron, 4 sulfur cluster binding(GO:005…	Q9FNN5|NDUV1_ARATH|-261.4|NADH dehydrogenase [ubiquinone] flavoprotein 1, mitochondrial OS=Arabidopsis thaliana GN=At5g08530 PE=1 SV=1	4558.Sb02g041180.1|-265.7|COG1894|C|Nadh dehydrogenase	PF01512.16|Complex1_51K|1.8e-47|Respiratory-chain NADH dehydrogenase 51 Kd subunit
c82345/f1p4/1961	XP_020249978.1|0x1.4352f431c2fb5p-244|pentatricopeptide repeat-containing protein At2g17140 [Asparagus officinalis]_x0001_XP_020249979.1 pentatricopeptide repeat-containing protein At2g17140 [Asparagus officinalis]	-	-	-	-	-
c22283/f1p15/2152	XP_020261629.1|0x1.d4b634f0e52fcp-603|CO(2)-response secreted protease-like [Asparagus officinalis]	-	cellular_component:cell wall(GO:0005618);;cellular_component:cell wall(GO:0005618);;biological_process:proteolysis(GO:0006508);;molecular_function:peptidase activity(GO:0008233);;molecular_function:serine-type peptidase activity(GO:0008236);;molecular_function:hydrolase activity(GO:0016787);;biological_process:negative regulation of stomatal complex development(GO:2000122);;molecular_function:ser…	Q9LNU1|CRSP_ARATH|-143.8|CO(2)-response secreted protease OS=Arabidopsis thaliana GN=CRSP PE=2 SV=1	4555.Si028992m|-160.3|COG1404|O|peptidase (S8 and S53, subtilisin, kexin, sedolisin	PF00082.21|Peptidase_S8|6.2e-45|Subtilase family
c1420/f1p320/2434	ONK55535.1|0x1.d29487e5058e3p-170|uncharacterized protein A4U43_UnF1970 [Asparagus officinalis]	pper:PRUPE_ppa005268mg|-48.6|K17839|PAO4, PAO3, PAO2; polyamine oxidase [EC:1.5.3.17 1.5.3.-]|ko00330|Arginine and proline metabolism;;ko00410|beta-Alanine metabolism;;	molecular_function:norspermine:oxygen oxidoreductase activity(GO:0052894);;molecular_function:N1-acetylspermine:oxygen oxidoreductase (N1-acetylspermidine-forming) activity(GO:0052895);;molecular_function:spermine:oxygen oxidoreductase (spermidine-forming) activity(GO:0052901);;biological_process:oxidation-reduction process(GO:0055114);;cellular_component:peroxisome(GO:0005777);;cellular_componen…	Q8H191|PAO4_ARATH|-46.0|Probable polyamine oxidase 4 OS=Arabidopsis thaliana GN=PAO4 PE=1 SV=1	3847.GLYMA18G05140.1|-48.4|ENOG410XSNC|S|amine oxidase	-
c11489/f1p111/2383	ONK55535.1|0x1.3e6f75faf93bfp-366|uncharacterized protein A4U43_UnF1970 [Asparagus officinalis]	pda:103723706|-105.7|K17839|PAO4, PAO3, PAO2; polyamine oxidase [EC:1.5.3.17 1.5.3.-]|ko00330|Arginine and proline metabolism;;ko00410|beta-Alanine metabolism;;	molecular_function:norspermine:oxygen oxidoreductase activity(GO:0052894);;molecular_function:N1-acetylspermine:oxygen oxidoreductase (N1-acetylspermidine-forming) activity(GO:0052895);;molecular_function:spermine:oxygen oxidoreductase (spermidine-forming) activity(GO:0052901);;biological_process:oxidation-reduction process(GO:0055114);;cellular_component:peroxisome(GO:0005777);;cellular_componen…	Q8H191|PAO4_ARATH|-101.0|Probable polyamine oxidase 4 OS=Arabidopsis thaliana GN=PAO4 PE=1 SV=1	4113.PGSC0003DMT400061872|-102.4|ENOG410XSNC|S|amine oxidase	PF01593.23|Amino_oxidase|1.3e-47|Flavin containing amine oxidoreductase
c46734/f1p0/1033	XP_004147242.1|0x1.35fff0ef6bb8cp-139|PREDICTED: calcineurin B-like protein 1 [Cucumis sativus]_x0001_XP_008448767.1 PREDICTED: calcineurin B-like protein 1 [Cucumis melo]_x0001_XP_008448768.1 PREDICTED: calcineurin B-like protein 1 [Cucumis melo]_x0001_XP_008448769.1 PREDICTED: calcineurin B-like protein 1 [Cucumis melo]_x0001_KGN55813.1 hypothetical protein Csa_3G017070 [Cucumis sativus]	-	cellular_component:membrane(GO:0016020);;molecular_function:kinase binding(GO:0019900);;molecular_function:metal ion binding(GO:0046872);;cellular_component:plasma membrane(GO:0005886);;cellular_component:plasma membrane(GO:0005886);;biological_process:abscisic acid-activated signaling pathway(GO:0009738)	O81445|CNBL1_ARATH|-42.8|Calcineurin B-like protein 1 OS=Arabidopsis thaliana GN=CBL1 PE=1 SV=3	3711.Bra012655.1-P|-43.4|COG5126|DTZ|Calcium-binding protein	-
c86654/f1p14/1080	XP_009407428.1|0x1.8d2e0e6d5120cp-359|PREDICTED: transmembrane protein 147 [Musa acuminata subsp. malaccensis]	-	-	-	4641.GSMUA_Achr6P34650_001|-109.9|ENOG41101UF|S|Transmembrane protein 147	PF09767.8|DUF2053|4e-49|Predicted membrane protein (DUF2053)
c277105/f1p8/1454	KVI02788.1|0x1.531bc7bf96f55p-356|hypothetical protein Ccrd_018920 [Cynara cardunculus var. scolymus]	-	-	-	3694.POPTR_0005s15290.1|-75.6|COG1073|S|Hydrolase	-
c194935/f1p88/1493	XP_020274064.1|0x1.fc99d87948c42p-481|enolase [Asparagus officinalis]_x0001_ONK64646.1 uncharacterized protein A4U43_C07F28350 [Asparagus officinalis]	pda:103708238|-139.0|K01689|ENO, eno; enolase [EC:4.2.1.11]|ko03018|RNA degradation;;ko01200|Carbon metabolism;;ko01230|Biosynthesis of amino acids;;ko00010|Glycolysis / Gluconeogenesis;;	biological_process:glycolytic process(GO:0006096);;biological_process:glycolytic process(GO:0006096);;molecular_function:lyase activity(GO:0016829);;molecular_function:metal ion binding(GO:0046872);;molecular_function:phosphopyruvate hydratase activity(GO:0004634);;cellular_component:cytoplasm(GO:0005737);;cellular_component:cytoplasm(GO:0005737)	Q42971|ENO_ORYSJ|-138.0|Enolase OS=Oryza sativa subsp. japonica GN=ENO1 PE=1 SV=2	3694.POPTR_0015s14380.1|-140.1|COG0148|G|Catalyzes the reversible conversion of 2- phosphoglycerate into phosphoenolpyruvate. It is essential for the degradation of carbohydrates via glycolysis (By similarity)	PF00113.21|Enolase_C|3.4e-65|Enolase, C-terminal TIM barrel domain
c279499/f1p7/1092	XP_010919050.1|0x1.796a9bebf7975p-248|PREDICTED: UMP-CMP kinase [Elaeis guineensis]	egu:105043268|-75.3|K13800|CMPK1, UMPK; UMP-CMP kinase [EC:2.7.4.- 2.7.4.14]|ko00240|Pyrimidine metabolism;;	cellular_component:nucleus(GO:0005634);;cellular_component:nucleus(GO:0005634);;cellular_component:cytoplasm(GO:0005737);;cellular_component:cytoplasm(GO:0005737);;biological_process:pyrimidine nucleotide biosynthetic process(GO:0006221);;molecular_function:kinase activity(GO:0016301);;biological_process:phosphorylation(GO:0016310);;molecular_function:transferase activity(GO:0016740);;molecular_f…	Q6NMK6|KCY2_ARATH|-72.4|Probable UMP-CMP kinase 2 OS=Arabidopsis thaliana GN=UMK2 PE=2 SV=1	4641.GSMUA_Achr4P18070_001|-72.0|COG0563|F|Catalyzes the reversible transfer of the terminal phosphate group between ATP and AMP. Plays an important role in cellular energy homeostasis and in adenine nucleotide metabolism (By similarity)	PF00406.21|ADK|1.5e-44|Adenylate kinase
c20955/f3p92/3248	XP_020258663.1|0x0p+0|LOW QUALITY PROTEIN: protein argonaute MEL1-like [Asparagus officinalis]	-	biological_process:gene silencing by RNA(GO:0031047)	Q6EU14|AGO1A_ORYSJ|-294.9|Protein argonaute 1A OS=Oryza sativa subsp. japonica GN=AGO1A PE=2 SV=1	15368.BRADI1G05162.1|-10000.0|ENOG410XP07|J|eukaryotic translation initiation factor 2c	PF02171.16|Piwi|4.1e-98|Piwi domain
c97176/f1p2/919	OEL20681.1|0x1.788ebba6d49d5p-120|putative glutathione S-transferase GSTU6, partial [Dichanthelium oligosanthes]	sbi:SORBI_01g030930|-36.5|K00799|GST, gst; glutathione S-transferase [EC:2.5.1.18]|ko00480|Glutathione metabolism;;	molecular_function:glutathione transferase activity(GO:0004364);;biological_process:auxin-activated signaling pathway(GO:0009734);;molecular_function:transferase activity(GO:0016740)	Q03663|GSTX2_TOBAC|-36.2|Probable glutathione S-transferase OS=Nicotiana tabacum PE=2 SV=1	4558.Sb01g030930.1|-37.9|ENOG410XSIX|O|glutathione Stransferase	-
c27236/f3p7/1739	PKA46689.1|0x1.7c43a8110c67ap-106|Katanin p80 WD40 repeat-containing subunit B1 like [Apostasia shenzhenica]	-	-	-	4558.Sb02g000766.1|-42.0|ENOG410XQIU|S|ddb1 and cul4 associated factor	-
c23163/f1p9/2548	ONK65338.1|0x1.f872776dfa936p-137|uncharacterized protein A4U43_C07F36090 [Asparagus officinalis]	-	-	O80644|ACR9_ARATH|-41.5|ACT domain-containing protein ACR9 OS=Arabidopsis thaliana GN=ACR9 PE=2 SV=1	3694.POPTR_0001s24370.1|-40.5|ENOG410YUMM|S|ACT domain containing protein, expressed	-
c105/f1p4050/6178	AKR15675.1|0x1.7112f63bb1022p-378|coat protein [Garlic virus X]_x0001_AKR15677.1 coat protein [Garlic virus X]_x0001_AKR15678.1 coat protein [Garlic virus X]_x0001_AKR15679.1 coat protein [Garlic virus X]_x0001_AKR15680.1 coat protein [Garlic virus X]_x0001_AKR15682.1 coat protein [Garlic virus X]_x0001_ASY93298.1 coat protein [Garlic virus X]_x0001_ASY93300.1 coat protein [Garlic virus X]_x0001_…	-	-	-	-	PF00286.19|Flexi_CP|1e-45|Viral coat protein
c38445/f1p3/2045	XP_020590437.1|0x1.615edac6351ccp-147|pentatricopeptide repeat-containing protein At4g36680, mitochondrial-like [Phalaenopsis equestris]	-	-	-	29760.VIT_04s0023g01460.t01|-27.6|ENOG410Z7Z7|S|Pentatricopeptide repeat-containing protein	-
c14365/f1p5/1579	XP_020275362.1|0x1.cc87166f9ea3ep-207|GDP-mannose transporter GONST3-like [Asparagus officinalis]_x0001_ONK64369.1 uncharacterized protein A4U43_C07F25090 [Asparagus officinalis]	-	molecular_function:antiporter activity(GO:0015297);;cellular_component:membrane(GO:0016020);;cellular_component:integral component of membrane(GO:0016021);;cellular_component:Golgi membrane(GO:0000139);;cellular_component:Golgi apparatus(GO:0005794);;biological_process:carbohydrate transport(GO:0008643)	Q9S845|GONS3_ARATH|-55.1|GDP-mannose transporter GONST3 OS=Arabidopsis thaliana GN=GONST3 PE=2 SV=1	3694.POPTR_0008s17770.1|-60.0|COG5070|U|Solute carrier family 35	-
c13760/f1p11/2720	PKA62525.1|0x0p+0|Protein TPLATE [Apostasia shenzhenica]	-	cellular_component:cytoplasm(GO:0005737);;cellular_component:cytoskeleton(GO:0005856);;cellular_component:phragmoplast(GO:0009524)	F4J8D3|TPLAT_ARATH|-314.8|Protein TPLATE OS=Arabidopsis thaliana GN=TPLATE PE=1 SV=1	4081.Solyc11g068640.1.1|-10000.0|ENOG410XXD9|S|NA	-
c5470/f1p52/3518	XP_020243215.1|0x1.2c1c55cc9a667p-729|protein TPR2-like isoform X1 [Asparagus officinalis]	-	biological_process:regulation of transcription, DNA-templated(GO:0006355);;cellular_component:nucleus(GO:0005634);;cellular_component:nucleus(GO:0005634);;biological_process:transcription, DNA-templated(GO:0006351)	Q0J7U6|TPR2_ORYSJ|-196.1|Protein TPR2 OS=Oryza sativa subsp. japonica GN=TPR2 PE=1 SV=1	4641.GSMUA_Achr4P12340_001|-207.8|ENOG410XP3K|S|Positively regulates the activity of the minus-end directed microtubule motor protein dynein. May enhance dynein- mediated microtubule sliding by targeting dynein to the microtubule plus end. Required for	-
c34675/f1p52/2358	XP_010929072.1|0x1.f28a2316e43fp-1007|PREDICTED: DNA-directed RNA polymerase 2B, chloroplastic/mitochondrial-like [Elaeis guineensis]	-	cellular_component:mitochondrion(GO:0005739);;molecular_function:transferase activity(GO:0016740);;molecular_function:nucleotidyltransferase activity(GO:0016779);;molecular_function:DNA-directed 5'-3' RNA polymerase activity(GO:0003899);;molecular_function:DNA-directed 5'-3' RNA polymerase activity(GO:0003899);;cellular_component:mitochondrion(GO:0005739)	Q8L6J5|RPO1B_TOBAC|-295.7|DNA-directed RNA polymerase 1B, mitochondrial OS=Nicotiana tabacum GN=RPOT1-TOM PE=2 SV=2	4558.Sb02g039520.1|-301.4|COG5108|K|DNA-dependent RNA polymerase catalyzes the transcription of DNA into RNA using the four ribonucleoside triphosphates as substrates (By similarity)	PF00940.18|RNA_pol|5e-160|DNA-dependent RNA polymerase
c13140/f3p7/1043	XP_020265880.1|0x1.5cc9ee29fa4f2p-313|probable xyloglucan endotransglucosylase/hydrolase protein 23 [Asparagus officinalis]	-	biological_process:metabolic process(GO:0008152);;molecular_function:transferase activity(GO:0016740);;molecular_function:xyloglucan:xyloglucosyl transferase activity(GO:0016762);;molecular_function:hydrolase activity(GO:0016787);;molecular_function:hydrolase activity, acting on glycosyl bonds(GO:0016798);;cellular_component:apoplast(GO:0048046);;cellular_component:apoplast(GO:0048046);;biologica…	Q38857|XTH22_ARATH|-84.5|Xyloglucan endotransglucosylase/hydrolase protein 22 OS=Arabidopsis thaliana GN=XTH22 PE=1 SV=1	4641.GSMUA_Achr8P15560_001|-90.8|COG2273|G|hydrolase family 16	PF00722.20|Glyco_hydro_16|1.5e-48|Glycosyl hydrolases family 16
c139602/f1p372/1482	XP_008787861.1|0x1.b5336088578eep-64|PREDICTED: nuclear transcription factor Y subunit A-6-like [Phoenix dactylifera]	-	-	-	-	-
c1535/f1p119/4305	XP_019255838.1|0x0p+0|PREDICTED: pre-mRNA-processing-splicing factor 8A isoform X3 [Nicotiana attenuata]	sbi:SORBI_10g004680|-10000.0|K12856|PRPF8, PRP8; pre-mRNA-processing factor 8|ko03040|Spliceosome;;	cellular_component:nucleus(GO:0005634);;cellular_component:nucleus(GO:0005634);;cellular_component:spliceosomal complex(GO:0005681);;biological_process:mRNA processing(GO:0006397);;biological_process:RNA splicing(GO:0008380);;cellular_component:intracellular ribonucleoprotein complex(GO:0030529);;biological_process:mRNA splicing, via spliceosome(GO:0000398);;molecular_function:RNA binding(GO:0003…	Q9SSD2|PRP8A_ARATH|-264.5|Pre-mRNA-processing-splicing factor 8A OS=Arabidopsis thaliana GN=PRP8A PE=1 SV=1	39947.LOC_Os06g07080.1|-10000.0|COG5178|A|PRP8 pre-mRNA processing factor 8 homolog (S. cerevisiae)	PF12134.7|PRP8_domainIV|1.3e-130|PRP8 domain IV core
c31020/f1p28/3376	ONK71865.1|0x1.195465c22eb85p-177|uncharacterized protein A4U43_C04F13180 [Asparagus officinalis]	-	molecular_function:hydrolase activity(GO:0016787);;molecular_function:carboxypeptidase activity(GO:0004180);;biological_process:proteolysis(GO:0006508);;molecular_function:peptidase activity(GO:0008233)	P37891|CBP3_ORYSJ|-51.8|Serine carboxypeptidase 3 OS=Oryza sativa subsp. japonica GN=CBP3 PE=2 SV=1	4641.GSMUA_Achr4P05490_001|-54.0|COG2939|E|carboxy-peptidase	PF00450.21|Peptidase_S10|6.1e-29|Serine carboxypeptidase
c867/f2p9/2140	XP_010928979.1|0x1.c17cea9b5a9a9p-567|PREDICTED: transmembrane E3 ubiquitin-protein ligase 1 isoform X3 [Elaeis guineensis]	-	-	-	29760.VIT_12s0028g03410.t01|-165.1|COG5540|O|RING finger ubiquitin ligase	-
c22487/f1p10/1529	XP_020257026.1|0x1.4af1317f747dap-256|histone-lysine N-methyltransferase ASHR1 isoform X1 [Asparagus officinalis]_x0001_ONK75200.1 uncharacterized protein A4U43_C03F14400 [Asparagus officinalis]	-	-	-	4641.GSMUA_Achr3P01510_001|-69.9|COG2940|S|Histone-lysine N-methyltransferase	-
c171/f1p32/5738	XP_010938882.1|0x1.acfce64f1580fp-355|PREDICTED: polyadenylate-binding protein RBP47B' [Elaeis guineensis]	-	cellular_component:nucleus(GO:0005634);;cellular_component:nucleus(GO:0005634);;biological_process:mRNA processing(GO:0006397);;molecular_function:poly(A) binding(GO:0008143);;cellular_component:cytoplasmic stress granule(GO:0010494);;biological_process:cellular response to heat(GO:0034605);;molecular_function:RNA binding(GO:0003723);;cellular_component:nucleus(GO:0005634);;cellular_component:nuc…	Q8VXZ9|R47BP_ARATH|-87.1|Polyadenylate-binding protein RBP47B' OS=Arabidopsis thaliana GN=RBP47B' PE=2 SV=1	4081.Solyc11g065880.1.1|-101.4|COG0724|S|Rna-binding protein	-
c26027/f1p4/2377	XP_008790539.1|0x1.c54182c18a8adp-598|PREDICTED: oligopeptide transporter 7-like [Phoenix dactylifera]_x0001_XP_017698452.1 PREDICTED: oligopeptide transporter 7-like [Phoenix dactylifera]	-	cellular_component:membrane(GO:0016020);;cellular_component:integral component of membrane(GO:0016021);;biological_process:protein transport(GO:0015031);;biological_process:peptide transport(GO:0015833);;cellular_component:membrane(GO:0016020)	O82485|OPT7_ARATH|-162.1|Oligopeptide transporter 7 OS=Arabidopsis thaliana GN=OPT7 PE=2 SV=1	39947.LOC_Os06g03540.1|-176.8|ENOG410XNZC|S|oligo-peptide transporter	PF03169.14|OPT|1.4e-94|OPT oligopeptide transporter protein
c81277/f1p35/952	OWM80627.1|0x1.2cc3a9a1ccf71p-305|hypothetical protein CDL15_Pgr006657 [Punica granatum]_x0001_PKI72475.1 hypothetical protein CRG98_007142 [Punica granatum]	-	cellular_component:integral component of membrane(GO:0016021);;molecular_function:transferase activity(GO:0016740);;molecular_function:transferase activity, transferring glycosyl groups(GO:0016757);;biological_process:cell wall organization(GO:0071555);;cellular_component:Golgi membrane(GO:0000139);;cellular_component:Golgi apparatus(GO:0005794);;cellular_component:membrane(GO:0016020)	Q6L538|CSLC7_ORYSJ|-93.9|Probable xyloglucan glycosyltransferase 7 OS=Oryza sativa subsp. japonica GN=CSLC7 PE=2 SV=1	3694.POPTR_0002s11490.1|-93.2|COG1215|M|Glycosyl transferase, family 2	-
c61761/f1p19/2089	XP_020259154.1|0x1.82bbc3a5e24d5p-474|uncharacterized protein LOC109835595 isoform X1 [Asparagus officinalis]_x0001_ONK76562.1 uncharacterized protein A4U43_C03F29560 [Asparagus officinalis]	-	-	-	4641.GSMUA_Achr7P08920_001|-133.8|ENOG410XP5A|S|Glycine-rich protein	-
c22591/f1p101/3719	XP_020253402.1|0x1.71c8215144fb7p-908|exocyst complex component 5-like [Asparagus officinalis]_x0001_ONK77732.1 uncharacterized protein A4U43_C02F9970 [Asparagus officinalis]	-	biological_process:exocytosis(GO:0006887);;biological_process:protein transport(GO:0015031)	Q2QV94|EXOC5_ORYSJ|-246.6|Exocyst complex component 5 OS=Oryza sativa subsp. japonica GN=SEC10 PE=2 SV=1	29760.VIT_15s0046g02200.t01|-252.1|ENOG410XSQQ|U|Exocyst complex component	PF07393.10|Sec10|1.4e-86|Exocyst complex component Sec10
c116171/f1p6/1236	XP_015615137.1|0x1.52d218bcfbfdfp-106|PREDICTED: zinc finger CCHC domain-containing protein 7 isoform X2 [Oryza sativa Japonica Group]	-	-	-	39947.LOC_Os11g36480.2|-33.9|COG5082|OU|zinc finger	-
c226100/f1p14/1529	XP_020246806.1|0x1.f07d55502612cp-485|uncharacterized protein C57A10.07 [Asparagus officinalis]_x0001_ONK57658.1 uncharacterized protein A4U43_C09F2750 [Asparagus officinalis]	-	-	-	4641.GSMUA_Achr9P08420_001|-126.4|ENOG4111HI1|S|DUF218 domain protein	-
c1269/f1p71/3095	XP_018838164.1|0x1.fadd028c6c8a6p-115|PREDICTED: uncharacterized protein LOC109004159 isoform X2 [Juglans regia]	egu:105045616|-46.8|K14546|UTP5, WDR43; U3 small nucleolar RNA-associated protein 5|ko03008|Ribosome biogenesis in eukaryotes;;	-	-	4555.Si034677m|-39.1|ENOG410XRY4|S|WD repeat domain 43	-
c89698/f2p4/1965	XP_020247818.1|0x1.27e5b3f6abf82p-472|scarecrow-like protein 6, partial [Asparagus officinalis]	-	-	-	4641.GSMUA_Achr1P05940_001|-120.3|ENOG410YANM|S|Scarecrow-like protein	PF03514.13|GRAS|7.2e-74|GRAS domain family
c39781/f1p5/1603	XP_020277147.1|0x1.23c65c5da71c2p-251|uncharacterized protein LOC109851429 isoform X1 [Asparagus officinalis]_x0001_XP_020277148.1 uncharacterized protein LOC109851429 isoform X1 [Asparagus officinalis]_x0001_XP_020277149.1 uncharacterized protein LOC109851429 isoform X1 [Asparagus officinalis]	-	-	-	4558.Sb03g009630.1|-71.7|ENOG410YEG4|S|Zinc knuckle	-
c192700/f1p36/1942	XP_020240929.1|0x1.52c2bd54b934ep-573|hydroxymethylglutaryl-CoA lyase, mitochondrial isoform X2 [Asparagus officinalis]_x0001_ONK61488.1 uncharacterized protein A4U43_C08F30430 [Asparagus officinalis]	pda:103706236|-161.9|K01640|E4.1.3.4, HMGCL, hmgL; hydroxymethylglutaryl-CoA lyase [EC:4.1.3.4]|ko00280|Valine, leucine and isoleucine degradation;;ko00072|Synthesis and degradation of ketone bodies;;ko00650|Butanoate metabolism;;ko04146|Peroxisome;;	cellular_component:mitochondrial matrix(GO:0005759);;molecular_function:lyase activity(GO:0016829);;molecular_function:metal ion binding(GO:0046872);;molecular_function:metal ion binding(GO:0046872);;molecular_function:hydroxymethylglutaryl-CoA lyase activity(GO:0004419);;molecular_function:hydroxymethylglutaryl-CoA lyase activity(GO:0004419);;cellular_component:mitochondrion(GO:0005739)	O81027|HMGCL_ARATH|-139.8|Hydroxymethylglutaryl-CoA lyase, mitochondrial OS=Arabidopsis thaliana GN=HMGCL PE=1 SV=2	4641.GSMUA_Achr4P10100_001|-154.1|COG0119|E|Catalyzes the condensation of the acetyl group of acetyl-CoA with 3-methyl-2-oxobutanoate (2-oxoisovalerate) to form 3-carboxy-3-hydroxy-4-methylpentanoate (2-isopropylmalate) (By similarity)	PF00682.18|HMGL-like|7.6e-57|HMGL-like
c27259/f1p18/1016	XP_018683183.1|0x1.489e2dace4308p-196|PREDICTED: homeobox-leucine zipper protein HOX21-like [Musa acuminata subsp. malaccensis]	-	cellular_component:nucleus(GO:0005634);;biological_process:transcription, DNA-templated(GO:0006351);;biological_process:regulation of transcription, DNA-templated(GO:0006355);;molecular_function:DNA binding(GO:0003677);;molecular_function:DNA binding(GO:0003677);;cellular_component:nucleus(GO:0005634)	A2XD08|HOX21_ORYSI|-43.4|Homeobox-leucine zipper protein HOX21 OS=Oryza sativa subsp. indica GN=HOX21 PE=2 SV=2	4641.GSMUA_Achr1P12270_001|-60.8|ENOG410Z2UE|K|homeobox-leucine zipper protein	-
c37941/f1p403/1910	ACN78838.1|0x1.17ab96fd3d794p-722|alliinase [Allium sativum]	-	molecular_function:alliin lyase activity(GO:0047654);;cellular_component:vacuole(GO:0005773);;cellular_component:vacuole(GO:0005773);;molecular_function:lyase activity(GO:0016829)	Q01594|ALLN1_ALLSA|-219.9|Alliin lyase 1 OS=Allium sativum PE=1 SV=1	29760.VIT_18s0157g00140.t01|-89.7|ENOG410XS9Z|S|tryptophan aminotransferase-related protein 4-like	PF04864.12|Alliinase_C|6.5e-164|Allinase
c188780/f1p14/1688	XP_008794574.1|0x1.f56108a815c81p-204|PREDICTED: uridine kinase-like protein 1, chloroplastic [Phoenix dactylifera]	pda:103710575|-62.0|K00876|udk, UCK; uridine kinase [EC:2.7.1.48]|ko00240|Pyrimidine metabolism;;	molecular_function:uridine kinase activity(GO:0004849);;molecular_function:GTP binding(GO:0005525);;biological_process:metabolic process(GO:0008152);;biological_process:metabolic process(GO:0008152);;cellular_component:chloroplast(GO:0009507);;cellular_component:chloroplast(GO:0009507);;cellular_component:plastid(GO:0009536);;molecular_function:kinase activity(GO:0016301);;biological_process:phos…	Q9LK34|UKL2_ARATH|-61.2|Uridine kinase-like protein 2, chloroplastic OS=Arabidopsis thaliana GN=UKL2 PE=2 SV=1	4641.GSMUA_Achr5P25140_001|-62.4|COG0035|F|Catalyzes the conversion of uracil and 5-phospho-alpha- D-ribose 1-diphosphate (PRPP) to UMP and diphosphate (By similarity)	PF14681.5|UPRTase|1.7e-44|Uracil phosphoribosyltransferase
c9817/f1p70/2475	XP_020267260.1|0x1.aec681b279f8cp-84|ricin B-like lectin R40G3 [Asparagus officinalis]_x0001_ONK67993.1 uncharacterized protein A4U43_C05F6040, partial [Asparagus officinalis]	-	molecular_function:carbohydrate binding(GO:0030246)	Q6Z4N6|40G2_ORYSJ|-24.9|Ricin B-like lectin R40G2 OS=Oryza sativa subsp. japonica GN=R40G2 PE=2 SV=1	4641.GSMUA_Achr6P32310_001|-25.6|ENOG410YRN6|S|Stress responsive protein	-
c15522/f1p131/2286	ONK71714.1|0x1.40c78dd3ef7f4p-419|uncharacterized protein A4U43_C04F11600 [Asparagus officinalis]	mus:103998561|-120.4|K00615|E2.2.1.1, tktA, tktB; transketolase [EC:2.2.1.1]|ko00710|Carbon fixation in photosynthetic organisms;;ko01200|Carbon metabolism;;ko01230|Biosynthesis of amino acids;;ko00030|Pentose phosphate pathway;;	cellular_component:plastid(GO:0009536);;cellular_component:thylakoid(GO:0009579);;cellular_component:membrane(GO:0016020);;molecular_function:transferase activity(GO:0016740);;biological_process:reductive pentose-phosphate cycle(GO:0019253);;molecular_function:metal ion binding(GO:0046872);;molecular_function:transketolase activity(GO:0004802);;cellular_component:chloroplast(GO:0009507);;cellular…	Q7SIC9|TKTC_MAIZE|-122.4|Transketolase, chloroplastic OS=Zea mays PE=1 SV=1	4577.GRMZM2G033208_P01|-121.5|COG0021|G|Transketolase	PF02779.23|Transket_pyr|1.2e-29|Transketolase, pyrimidine binding domain
c66/f1p5/6112	XP_019705253.1|0x1.8defeefaa9e28p-270|PREDICTED: mediator of RNA polymerase II transcription subunit 31 [Elaeis guineensis]_x0001_XP_019705254.1 PREDICTED: mediator of RNA polymerase II transcription subunit 31 [Elaeis guineensis]_x0001_XP_019705255.1 PREDICTED: mediator of RNA polymerase II transcription subunit 31 [Elaeis guineensis]_x0001_XP_019705256.1 PREDICTED: mediator of RNA polymerase II…	-	biological_process:regulation of transcription, DNA-templated(GO:0006355);;cellular_component:mediator complex(GO:0016592);;cellular_component:nucleus(GO:0005634);;cellular_component:nucleus(GO:0005634);;biological_process:transcription, DNA-templated(GO:0006351)	Q8VYB1|MED31_ARATH|-68.4|Mediator of RNA polymerase II transcription subunit 31 OS=Arabidopsis thaliana GN=MED31 PE=1 SV=1	4641.GSMUA_Achr2P10410_001|-78.2|COG5088|K|Component of the Mediator complex, a coactivator involved in the regulated transcription of nearly all RNA polymerase II-dependent genes. Mediator functions as a bridge to convey information from gene-specific regulatory proteins to the basal RNA polymerase II transcription machinery. Mediator is recruited to promoters by direct interactions with regulat…	PF05669.11|Med31|5e-36|SOH1
c121015/f1p37/1709	XP_020247653.1|0x1.39d6447337b91p-87|trans-resveratrol di-O-methyltransferase-like [Asparagus officinalis]_x0001_ONK57105.1 uncharacterized protein A4U43_C10F16670 [Asparagus officinalis]	-	-	-	-	-
c6253/f1p3/2255	ONK70939.1|0x1.005bbae89ca1ep-101|uncharacterized protein A4U43_C04F3070 [Asparagus officinalis]	-	-	-	4113.PGSC0003DMT400072665|-30.1|COG0174|E|glutamine synthetase	-
c56428/f1p22/1398	XP_010939176.1|0x1.2bfcf17b66943p-220|PREDICTED: phosphoserine phosphatase, chloroplastic [Elaeis guineensis]_x0001_XP_010939177.1 PREDICTED: phosphoserine phosphatase, chloroplastic [Elaeis guineensis]_x0001_XP_010939178.1 PREDICTED: phosphoserine phosphatase, chloroplastic [Elaeis guineensis]_x0001_XP_010939179.1 PREDICTED: phosphoserine phosphatase, chloroplastic [Elaeis guineensis]	egu:105058085|-67.0|K01079|serB, PSPH; phosphoserine phosphatase [EC:3.1.3.3]|ko00260|Glycine, serine and threonine metabolism;;ko01200|Carbon metabolism;;ko01230|Biosynthesis of amino acids;;	biological_process:L-serine metabolic process(GO:0006563);;biological_process:L-serine biosynthetic process(GO:0006564);;biological_process:cellular amino acid biosynthetic process(GO:0008652);;cellular_component:chloroplast(GO:0009507);;cellular_component:chloroplast(GO:0009507);;cellular_component:plastid(GO:0009536);;molecular_function:hydrolase activity(GO:0016787);;molecular_function:metal i…	O82796|SERC_ARATH|-58.0|Phosphoserine phosphatase, chloroplastic OS=Arabidopsis thaliana GN=PSP PE=1 SV=2	4641.GSMUA_Achr2P06210_001|-65.6|COG0560|E|phosphoserine phosphatase activity	-
c149292/f1p6/1729	Q944U4.1|0x1.bfcbcce2c6d01p-378|RecName: Full=S-adenosylmethionine synthase; Short=AdoMet synthase; AltName: Full=Methionine adenosyltransferase; Short=MAT_x0001_AAL16064.1 S-adenosyl-L-methionine synthetase [Dendrobium crumenatum]	gmx:100805448|-114.2|K00789|metK; S-adenosylmethionine synthetase [EC:2.5.1.6]|ko01230|Biosynthesis of amino acids;;ko00270|Cysteine and methionine metabolism;;	cellular_component:cytoplasm(GO:0005737);;cellular_component:cytoplasm(GO:0005737);;biological_process:S-adenosylmethionine biosynthetic process(GO:0006556);;biological_process:one-carbon metabolic process(GO:0006730);;molecular_function:transferase activity(GO:0016740);;molecular_function:metal ion binding(GO:0046872);;molecular_function:nucleotide binding(GO:0000166);;molecular_function:methion…	Q944U4|METK_DENCR|-116.8|S-adenosylmethionine synthase OS=Dendrobium crumenatum GN=SAMS PE=2 SV=1	3847.GLYMA13G20480.1|-115.5|COG0192|H|Catalyzes the formation of S-adenosylmethionine from methionine and ATP	PF02773.15|S-AdoMet_synt_C|8.1e-47|S-adenosylmethionine synthetase, C-terminal domain
c14334/f1p27/2680	XP_020260848.1|0x1.1474ed8897a7p-257|E3 ubiquitin-protein ligase bre1-like isoform X2 [Asparagus officinalis]	-	-	-	4641.GSMUA_Achr11P17550_001|-53.5|ENOG4110AAG|S|s-layer protein	-
c176321/f1p25/1517	XP_010099377.1|0x1.caa9d6426e2ep-275|Ketol-acid reductoisomerase [Morus notabilis]_x0001_EXB78102.1 Ketol-acid reductoisomerase [Morus notabilis]	pvu:PHAVU_005G095900g|-77.6|K00053|ilvC; ketol-acid reductoisomerase [EC:1.1.1.86]|ko00770|Pantothenate and CoA biosynthesis;;ko01210|2-Oxocarboxylic acid metabolism;;ko00290|Valine, leucine and isoleucine biosynthesis;;ko01230|Biosynthesis of amino acids;;	molecular_function:NADPH binding(GO:0070402);;biological_process:cellular amino acid biosynthetic process(GO:0008652);;biological_process:branched-chain amino acid biosynthetic process(GO:0009082);;biological_process:isoleucine biosynthetic process(GO:0009097);;biological_process:valine biosynthetic process(GO:0009099);;cellular_component:chloroplast(GO:0009507);;cellular_component:chloroplast(GO…	Q01292|ILV5_SPIOL|-57.4|Ketol-acid reductoisomerase, chloroplastic OS=Spinacia oleracea GN=AHRI PE=1 SV=1	3694.POPTR_0014s05460.1|-63.9|COG0059|E|Alpha-keto-beta-hydroxylacyl reductoisomerase	PF01450.18|IlvC|6.6e-30|Acetohydroxy acid isomeroreductase, catalytic domain
c44154/f1p5/2000	XP_006470166.1|0x1.d6cd5023fdd0fp-61|PREDICTED: homeobox-DDT domain protein RLT2-like isoform X2 [Citrus sinensis]	-	-	-	-	-
c29539/f1p0/1032	ONK74988.1|0x1.debe548e1c42fp-215|uncharacterized protein A4U43_C03F12150 [Asparagus officinalis]	-	-	-	4641.GSMUA_Achr10P17650_001|-62.8|ENOG4112BM2|S|NA	-
c3263/f1p35/4283	XP_010112288.1|0x1.3cdf27cb6870ap-269|Serine/threonine-protein kinase sepA [Morus notabilis]_x0001_EXC33091.1 Serine/threonine-protein kinase sepA [Morus notabilis]	-	biological_process:phosphorylation(GO:0016310);;molecular_function:protein binding(GO:0005515);;molecular_function:transferase activity(GO:0016740);;molecular_function:ATP binding(GO:0005524);;biological_process:regulation of embryonic development(GO:0045995);;cellular_component:nucleus(GO:0005634);;cellular_component:nucleolus(GO:0005730);;cellular_component:nucleolus(GO:0005730);;cellular_compo…	Q9LJD8|M3KE1_ARATH|-110.6|MAP3K epsilon protein kinase 1 OS=Arabidopsis thaliana GN=M3KE1 PE=1 SV=1	3711.Bra039396.1-P|-78.4|ENOG410XQGS|T|mitogen-activated protein kinase kinase kinase	-
c13649/f1p525/2571	XP_020260615.1|0x1.9e3979b45e00ap-261|glutathione S-transferase T1-like [Asparagus officinalis]_x0001_ONK71521.1 uncharacterized protein A4U43_C04F9500 [Asparagus officinalis]	csv:101211608|-76.8|K00799|GST, gst; glutathione S-transferase [EC:2.5.1.18]|ko00480|Glutathione metabolism;;	cellular_component:nucleus(GO:0005634);;cellular_component:peroxisome(GO:0005777);;cellular_component:peroxisome(GO:0005777);;biological_process:response to toxic substance(GO:0009636);;molecular_function:oxidoreductase activity(GO:0016491);;molecular_function:transferase activity(GO:0016740);;biological_process:oxidation-reduction process(GO:0055114);;molecular_function:glutathione transferase a…	Q9ZRT5|GSTT1_ARATH|-70.3|Glutathione S-transferase T1 OS=Arabidopsis thaliana GN=GSTT1 PE=2 SV=1	4641.GSMUA_AchrUn_randomP06220_001|-78.0|COG0625|O|glutathione Stransferase	-
c57411/f1p4/1574	ONK56801.1|0x1.064101c4a2c4bp-446|uncharacterized protein A4U43_C10F13130 [Asparagus officinalis]	-	-	-	4555.Si005164m|-120.2|ENOG410Z7Z7|S|Pentatricopeptide repeat-containing protein	-
c24030/f1p11/2538	XP_020531932.1|0x1.815b7b6794548p-179|ABC transporter E family member 2 isoform X2 [Amborella trichopoda]	-	cellular_component:membrane(GO:0016020);;molecular_function:metal ion binding(GO:0046872);;molecular_function:iron-sulfur cluster binding(GO:0051536);;molecular_function:4 iron, 4 sulfur cluster binding(GO:0051539);;molecular_function:nucleotide binding(GO:0000166);;molecular_function:ATP binding(GO:0005524);;cellular_component:membrane(GO:0016020)	Q8LPJ4|AB2E_ARATH|-53.4|ABC transporter E family member 2 OS=Arabidopsis thaliana GN=ABCE2 PE=2 SV=1	4577.GRMZM2G109121_P02|-56.0|COG1245|S|ATP-binding cassette, sub-family E	-
c258602/f6p110/1059	XP_006436236.1|0x1.12c2b29f937c7p-98|hypothetical protein CICLE_v10032328mg [Citrus clementina]_x0001_XP_006485914.1 PREDICTED: methylesterase 1-like [Citrus sinensis]_x0001_ESR49476.1 hypothetical protein CICLE_v10032328mg [Citrus clementina]_x0001_GAY45425.1 hypothetical protein CUMW_089420 [Citrus unshiu]	-	molecular_function:hydrolase activity(GO:0016787)	O80476|MES2_ARATH|-29.5|Methylesterase 2 OS=Arabidopsis thaliana GN=MES2 PE=1 SV=1	3847.GLYMA11G06330.1|-31.7|ENOG4111IVV|S|esterase	-
c37374/f1p4/1416	XP_020275293.1|0x1.03ebbdd33c6b8p-409|uncharacterized protein LOC109849821 isoform X1 [Asparagus officinalis]_x0001_ONK63059.1 uncharacterized protein A4U43_C07F10990 [Asparagus officinalis]	-	-	-	4558.Sb09g002890.1|-113.6|COG0216|J|Peptide chain release factor 1 directs the termination of translation in response to the peptide chain termination codons UAG and UAA (By similarity)	PF03462.17|PCRF|1e-59|PCRF domain
c80168/f1p16/1645	XP_020250047.1|0x1.1b967b8fe0085p-110|trans-resveratrol di-O-methyltransferase-like [Asparagus officinalis]_x0001_ONK55367.1 uncharacterized protein A4U43_UnF4210 [Asparagus officinalis]	-	-	-	29760.VIT_12s0028g02840.t01|-28.6|ENOG410XS7T|S|o-methyltransferase	-
c89594/f1p2/1414	XP_020265715.1|0x1.4306dbc2a77ffp-146|Golgi SNAP receptor complex member 1-1 [Asparagus officinalis]_x0001_ONK70423.1 uncharacterized protein A4U43_C05F33580 [Asparagus officinalis]	pda:103720348|-40.2|K08495|GOSR1, GOS1; golgi SNAP receptor complex member 1|ko04130|SNARE interactions in vesicular transport;;	cellular_component:membrane(GO:0016020);;cellular_component:integral component of membrane(GO:0016021);;biological_process:vesicle-mediated transport(GO:0016192);;cellular_component:Golgi membrane(GO:0000139);;cellular_component:Golgi apparatus(GO:0005794);;biological_process:protein transport(GO:0015031)	Q9LMP7|GOS11_ARATH|-33.7|Golgi SNAP receptor complex member 1-1 OS=Arabidopsis thaliana GN=GOS11 PE=2 SV=1	4558.Sb02g024720.1|-40.1|ENOG410YI1X|U|Involved in transport from the ER to the Golgi apparatus as well as in intra-Golgi transport. It belongs to a super-family of proteins called t-SNAREs or soluble NSF (N-ethylmaleimide- sensitive factor) attachment protein receptor (By similarity)	-
c13248/f1p13/1518	XP_020263758.1|0x1.8590433157b3dp-593|probable trehalose-phosphate phosphatase F isoform X1 [Asparagus officinalis]_x0001_XP_020263759.1 probable trehalose-phosphate phosphatase F isoform X1 [Asparagus officinalis]_x0001_ONK73807.1 uncharacterized protein A4U43_C04F35590 [Asparagus officinalis]	nnu:104602297|-158.1|K01087|otsB; trehalose 6-phosphate phosphatase [EC:3.1.3.12]|ko00500|Starch and sucrose metabolism;;	molecular_function:trehalose-phosphatase activity(GO:0004805);;biological_process:trehalose biosynthetic process(GO:0005992);;molecular_function:hydrolase activity(GO:0016787)	O64896|TPPA_ARATH|-133.2|Trehalose-phosphate phosphatase A OS=Arabidopsis thaliana GN=TPPA PE=1 SV=1	29760.VIT_16s0022g00660.t01|-149.3|COG1877|G|trehalose biosynthetic process	PF02358.15|Trehalose_PPase|8.6e-70|Trehalose-phosphatase
c40581/f1p19/2979	XP_010688434.1|0x1.142a9d83aa264p-557|PREDICTED: pumilio homolog 5 isoform X4 [Beta vulgaris subsp. vulgaris]	-	cellular_component:cytoplasm(GO:0005737);;biological_process:regulation of translation(GO:0006417);;molecular_function:RNA binding(GO:0003723);;molecular_function:mRNA binding(GO:0003729);;cellular_component:cytoplasm(GO:0005737)	Q9LJX4|PUM5_ARATH|-146.4|Pumilio homolog 5 OS=Arabidopsis thaliana GN=APUM5 PE=1 SV=2	4558.Sb07g026995.1|-157.9|COG5099|J|pumilio homolog	-
c4645/f1p3/1161	ONK67273.1|0x1.4083ad28a338ep-240|uncharacterized protein A4U43_C06F18430 [Asparagus officinalis]	-	-	-	29760.VIT_03s0063g00610.t01|-70.8|COG2130|S|alcohol dehydrogenase	PF00106.24|adh_short|2.4e-39|short chain dehydrogenase
c2965/f1p14/4724	XP_020248710.1|0x1.92738cc00b735p-945|uncharacterized protein LOC109826137 [Asparagus officinalis]_x0001_ONK80629.1 uncharacterized protein A4U43_C01F19960 [Asparagus officinalis]	-	-	-	3847.GLYMA13G17971.1|-5.7|ENOG410YFHW|S|transposon protein	-
c3065/f1p264/4080	XP_010914890.1|0x0p+0|PREDICTED: probable cellulose synthase A catalytic subunit 1 [UDP-forming] [Elaeis guineensis]	-	cellular_component:integral component of membrane(GO:0016021);;molecular_function:transferase activity(GO:0016740);;molecular_function:transferase activity, transferring glycosyl groups(GO:0016757);;molecular_function:cellulose synthase (UDP-forming) activity(GO:0016760);;biological_process:cellulose biosynthetic process(GO:0030244);;molecular_function:metal ion binding(GO:0046872);;biological_pr…	Q6AT26|CESA1_ORYSJ|-307.0|Probable cellulose synthase A catalytic subunit 1 [UDP-forming] OS=Oryza sativa subsp. japonica GN=CESA1 PE=2 SV=1	3694.POPTR_0018s01540.1|-10000.0|COG1215|M|Glycosyl transferase, family 2	PF03552.13|Cellulose_synt|0|Cellulose synthase
c92952/f1p0/1514	PKA52962.1|0x1.654f6399f2509p-131|hypothetical protein AXF42_Ash001943 [Apostasia shenzhenica]	-	-	-	4641.GSMUA_Achr10P30240_001|-34.3|ENOG410YHKF|S|NA	-
c150/f1p67/5512	OVA06241.1|0x0p+0|Phosphoenolpyruvate carboxylase [Macleaya cordata]	egu:105047390|-10000.0|K01595|ppc; phosphoenolpyruvate carboxylase [EC:4.1.1.31]|ko00710|Carbon fixation in photosynthetic organisms;;ko00620|Pyruvate metabolism;;ko01200|Carbon metabolism;;	molecular_function:phosphoenolpyruvate carboxylase activity(GO:0008964);;biological_process:carbon fixation(GO:0015977);;biological_process:carbon fixation(GO:0015977);;molecular_function:lyase activity(GO:0016829);;cellular_component:cytoplasm(GO:0005737);;cellular_component:cytoplasm(GO:0005737);;molecular_function:phosphoenolpyruvate carboxylase activity(GO:0008964)	Q9FV65|CAPPC_FLATR|-10000.0|Phosphoenolpyruvate carboxylase 2 OS=Flaveria trinervia GN=PPCC PE=1 SV=1	29760.VIT_12s0028g02180.t01|-10000.0|COG2352|C|phosphoenolpyruvate carboxylase activity	PF00311.16|PEPcase|0|Phosphoenolpyruvate carboxylase
c36928/f1p54/3599	XP_020264916.1|0x1.0ebf914710773p-652|glucan endo-1,3-beta-glucosidase 13-like isoform X2 [Asparagus officinalis]	-	cellular_component:plasma membrane(GO:0005886);;cellular_component:plasma membrane(GO:0005886);;biological_process:defense response(GO:0006952);;biological_process:metabolic process(GO:0008152);;cellular_component:membrane(GO:0016020);;molecular_function:hydrolase activity(GO:0016787);;molecular_function:hydrolase activity, acting on glycosyl bonds(GO:0016798);;cellular_component:anchored compone…	Q9FJU9|E1313_ARATH|-164.4|Glucan endo-1,3-beta-glucosidase 13 OS=Arabidopsis thaliana GN=At5g56590 PE=1 SV=1	39946.BGIOSGA004430-PA|-184.5|ENOG410YA1S|G|glucan endo-1-3-beta-glucosidase	PF00332.17|Glyco_hydro_17|4.3e-81|Glycosyl hydrolases family 17
c37299/f1p7/1781	XP_008794105.1|0x1.18b2ba0943208p-507|PREDICTED: receptor-like protein kinase 5 [Phoenix dactylifera]	-	cellular_component:plasma membrane(GO:0005886);;cellular_component:plasma membrane(GO:0005886);;cellular_component:membrane(GO:0016020);;cellular_component:integral component of membrane(GO:0016021);;molecular_function:kinase activity(GO:0016301);;biological_process:phosphorylation(GO:0016310);;molecular_function:transferase activity(GO:0016740);;molecular_function:nucleotide binding(GO:0000166);…	C0LGX3|HSL2_ARATH|-61.4|LRR receptor-like serine/threonine-protein kinase HSL2 OS=Arabidopsis thaliana GN=HSL2 PE=2 SV=1	4081.Solyc12g008500.1.1|-137.4|COG4886|S|leucine Rich Repeat	PF00069.24|Pkinase|4.1e-46|Protein kinase domain
c86813/f2p7/1285	BAJ99523.1|0x1.f3ff9fba4d62ep-134|predicted protein [Hordeum vulgare subsp. vulgare]	-	-	-	15368.BRADI3G31980.1|-40.8|COG2423|E|Ornithine Cyclodeaminase	PF02423.14|OCD_Mu_crystall|1.2e-30|Ornithine cyclodeaminase/mu-crystallin family
c88718/f1p22/1025	KMZ69355.1|0x1.7280f8a0d97cap-367|putative 40S ribosomal protein S3 [Zostera marina]	mus:103969559|-110.3|K02985|RP-S3e, RPS3; small subunit ribosomal protein S3e|ko03010|Ribosome;;	molecular_function:RNA binding(GO:0003723);;cellular_component:ribosome(GO:0005840);;cellular_component:intracellular ribonucleoprotein complex(GO:0030529)	Q9FJA6|RS33_ARATH|-108.2|40S ribosomal protein S3-3 OS=Arabidopsis thaliana GN=RPS3C PE=1 SV=1	4641.GSMUA_Achr3P20180_001|-111.5|COG0092|J|Binds the lower part of the 30S subunit head. Binds mRNA in the 70S ribosome, positioning it for translation (By similarity)	-
c26465/f1p31/3031	OUZ99959.1|0x1.5b51ad8845d31p-76|Short-chain dehydrogenase/reductase SDR [Macleaya cordata]	pda:103710898|-23.3|K13606|NOL, NYC1; chlorophyll(ide) b reductase [EC:1.1.1.294]|ko00860|Porphyrin and chlorophyll metabolism;;	cellular_component:thylakoid(GO:0009579);;biological_process:chlorophyll catabolic process(GO:0015996);;cellular_component:membrane(GO:0016020);;cellular_component:integral component of membrane(GO:0016021);;molecular_function:oxidoreductase activity(GO:0016491);;molecular_function:chlorophyll(ide) b reductase activity(GO:0034256);;biological_process:oxidation-reduction process(GO:0055114);;cellu…	Q5N800|NYC1_ORYSJ|-25.6|Probable chlorophyll(ide) b reductase NYC1, chloroplastic OS=Oryza sativa subsp. japonica GN=NYC1 PE=1 SV=1	15368.BRADI2G07550.1|-24.4|COG1028|S|Dehydrogenase reductase	-
c2715/f1p62/4411	XP_020264874.1|0x1.a51a165f84d63p-969|dolichyl-diphosphooligosaccharide--protein glycosyltransferase subunit STT3A [Asparagus officinalis]_x0001_ONK69757.1 uncharacterized protein A4U43_C05F26400 [Asparagus officinalis]	egu:105047433|-284.5|K07151|STT3; dolichyl-diphosphooligosaccharide--protein glycosyltransferase [EC:2.4.99.18]|ko04141|Protein processing in endoplasmic reticulum;;ko00510|N-Glycan biosynthesis;;	cellular_component:membrane(GO:0016020);;cellular_component:integral component of membrane(GO:0016021);;molecular_function:transferase activity(GO:0016740);;molecular_function:transferase activity, transferring glycosyl groups(GO:0016757);;cellular_component:endoplasmic reticulum(GO:0005783);;cellular_component:endoplasmic reticulum membrane(GO:0005789);;biological_process:protein glycosylation(G…	Q6F2Z1|STT3A_ORYSJ|-279.0|Dolichyl-diphosphooligosaccharide--protein glycosyltransferase subunit STT3A OS=Oryza sativa subsp. japonica GN=STT3A PE=2 SV=1	29760.VIT_11s0016g03320.t01|-280.9|COG1287|S|oligosaccharyl transferase STT3 subunit	PF02516.13|STT3|3.9e-38|Oligosaccharyl transferase STT3 subunit
c35499/f1p38/3109	XP_020242095.1|0x1.6923102cc84b8p-532|probable inactive purple acid phosphatase 1 [Asparagus officinalis]_x0001_XP_020242096.1 probable inactive purple acid phosphatase 1 [Asparagus officinalis]_x0001_ONK60187.1 uncharacterized protein A4U43_C08F15310 [Asparagus officinalis]	-	cellular_component:extracellular region(GO:0005576);;cellular_component:extracellular region(GO:0005576);;molecular_function:metal ion binding(GO:0046872)	Q9LMX4|PPA1_ARATH|-143.5|Probable inactive purple acid phosphatase 1 OS=Arabidopsis thaliana GN=PAP1 PE=2 SV=1	3694.POPTR_0010s16590.1|-153.6|COG1409|S|Hydrolyzes cAMP to 5'-AMP. Plays an important regulatory role in modulating the intracellular concentration of cAMP, thereby influencing cAMP-dependent processes (By similarity)	-
c37271/f1p1/969	XP_020267562.1|0x1.6890dded66981p-354|uncharacterized protein LOC109843040 [Asparagus officinalis]	-	-	-	39947.LOC_Os01g17020.1|-102.2|ENOG4111Z7K|S|NA	-
c30018/f1p25/2845	XP_020265274.1|0x1.6086882e57f5dp-668|LOW QUALITY PROTEIN: TBCC domain-containing protein 1-like [Asparagus officinalis]	-	-	-	4641.GSMUA_Achr1P19630_001|-193.8|ENOG410XRXF|S|TBCC domain containing 1	PF07986.11|TBCC|1.3e-29|Tubulin binding cofactor C
c25755/f1p168/2498	XP_020248996.1|0x1.fa8b6c0433213p-610|stromal 70 kDa heat shock-related protein, chloroplastic-like [Asparagus officinalis]_x0001_ONK57179.1 uncharacterized protein A4U43_C10F17410 [Asparagus officinalis]	-	cellular_component:plastid(GO:0009536);;cellular_component:chloroplast stroma(GO:0009570);;molecular_function:nucleotide binding(GO:0000166);;molecular_function:ATP binding(GO:0005524);;cellular_component:chloroplast(GO:0009507)	Q02028|HSP7S_PEA|-181.0|Stromal 70 kDa heat shock-related protein, chloroplastic OS=Pisum sativum GN=HSP70 PE=2 SV=1	3847.GLYMA16G00410.1|-180.7|COG0443|O|Heat shock protein	PF00012.19|HSP70|1.7e-131|Hsp70 protein
c2919/f1p106/5063	XP_020268251.1|0x1.248ea6aa1c02cp-819|squamosa promoter-binding-like protein 15 isoform X2 [Asparagus officinalis]	-	biological_process:transcription, DNA-templated(GO:0006351);;biological_process:regulation of transcription, DNA-templated(GO:0006355);;molecular_function:metal ion binding(GO:0046872);;molecular_function:DNA binding(GO:0003677);;cellular_component:nucleus(GO:0005634);;cellular_component:nucleus(GO:0005634)	Q700C2|SPL16_ARATH|-157.4|Squamosa promoter-binding-like protein 16 OS=Arabidopsis thaliana GN=SPL16 PE=2 SV=2	4641.GSMUA_Achr7P20630_001|-209.2|ENOG4110DQF|S|Squamosa promoter-binding-like protein	-
c342108/f1p4/773	XP_020273176.1|0x1.bc75511751c8ep-210|actin-depolymerizing factor 7-like isoform X1 [Asparagus officinalis]_x0001_ONK62312.1 uncharacterized protein A4U43_C07F2600 [Asparagus officinalis]	-	molecular_function:actin binding(GO:0003779)	Q9FVI2|ADF1_PETHY|-61.7|Actin-depolymerizing factor 1 OS=Petunia hybrida GN=ADF1 PE=2 SV=1	4513.MLOC_38210.1|-62.1|ENOG41122P5|S|actin-depolymerizing factor	PF00241.19|Cofilin_ADF|1e-34|Cofilin/tropomyosin-type actin-binding protein
c83632/f1p7/1201	XP_008778274.1|0x1.95e8ac50a6225p-306|PREDICTED: sucrose transport protein SUT4-like isoform X2 [Phoenix dactylifera]	-	biological_process:carbohydrate transport(GO:0008643);;molecular_function:symporter activity(GO:0015293);;cellular_component:membrane(GO:0016020);;cellular_component:integral component of membrane(GO:0016021);;cellular_component:plasma membrane(GO:0005886);;cellular_component:plasma membrane(GO:0005886);;biological_process:sucrose metabolic process(GO:0005985)	B8AF63|SUT4_ORYSI|-78.7|Sucrose transport protein SUT4 OS=Oryza sativa subsp. indica GN=SUT4 PE=3 SV=1	4641.GSMUA_Achr1P06880_001|-79.5|ENOG410XPTR|U|solute carrier family 45 member	-
c15030/f1p50/3471	CTQ87153.1|0x1.be92a9e7f0874p-242|coat protein [Garlic virus X]_x0001_CTQ87154.1 coat protein [Garlic virus X]	-	-	-	-	PF00286.19|Flexi_CP|1.4e-33|Viral coat protein
c25730/f1p11/2579	XP_017228879.1|0x1.b26780af9c81p-79|PREDICTED: uncharacterized protein LOC108204098, partial [Daucus carota subsp. sativus]	-	-	-	-	-
c1541/f1p286/3513	PKU61794.1|0x1.08fab54d04b65p-324|hypothetical protein MA16_Dca023572 [Dendrobium catenatum]	-	-	Q8L793|CID3_ARATH|-64.0|Polyadenylate-binding protein-interacting protein 3 OS=Arabidopsis thaliana GN=CID3 PE=2 SV=1	4538.ORGLA02G0146500.1|-80.2|COG5180|S|stress granule assembly	-
c25236/f1p29/3331	XP_019702416.1|0x1.1393e299fd97ep-501|PREDICTED: uncharacterized protein LOC105034044 isoform X2 [Elaeis guineensis]	-	-	-	4641.GSMUA_Achr3P19470_001|-144.4|ENOG410Y9A9|S|NA	-
c13944/f2p44/1212	XP_008813474.1|0x1.879ce6acf95aep-354|PREDICTED: vacuolar amino acid transporter 1-like isoform X4 [Phoenix dactylifera]	-	cellular_component:integral component of membrane(GO:0016021);;biological_process:amino acid transport(GO:0006865);;cellular_component:membrane(GO:0016020);;cellular_component:membrane(GO:0016020)	F4IUW3|AVT1C_ARATH|-97.3|Amino acid transporter AVT1C OS=Arabidopsis thaliana GN=AVT1C PE=1 SV=1	39946.BGIOSGA007315-PA|-100.7|COG0814|E|amino acid transport	PF01490.17|Aa_trans|7.1e-38|Transmembrane amino acid transporter protein
c1046/f1p828/4890	XP_010913416.1|0x1.31c6c39c529fep-579|PREDICTED: pyrophosphate--fructose 6-phosphate 1-phosphotransferase subunit beta [Elaeis guineensis]	egu:105039111|-175.1|K00895|pfp, PFP; diphosphate-dependent phosphofructokinase [EC:2.7.1.90]|ko00030|Pentose phosphate pathway;;ko00051|Fructose and mannose metabolism;;ko00010|Glycolysis / Gluconeogenesis;;	biological_process:glycolytic process(GO:0006096);;biological_process:glycolytic process(GO:0006096);;biological_process:metabolic process(GO:0008152);;molecular_function:kinase activity(GO:0016301);;biological_process:phosphorylation(GO:0016310);;molecular_function:transferase activity(GO:0016740);;molecular_function:metal ion binding(GO:0046872);;molecular_function:diphosphate-fructose-6-phosph…	P21343|PFPB_SOLTU|-162.5|Pyrophosphate--fructose 6-phosphate 1-phosphotransferase subunit beta OS=Solanum tuberosum GN=PFP-BETA PE=1 SV=3	4641.GSMUA_Achr8P22590_001|-174.2|COG0205|G|phosphohexokinase	PF00365.19|PFK|5.4e-37|Phosphofructokinase
c218628/f1p12/1613	XP_020274348.1|0x1.6a0c281dee40fp-296|zinc finger protein-like 1 homolog [Asparagus officinalis]_x0001_ONK64822.1 uncharacterized protein A4U43_C07F30330 [Asparagus officinalis]	-	-	-	29760.VIT_03s0091g00720.t01|-79.6|ENOG410ZR2P|S|Zinc finger protein-like 1	-
c37377/f2p15/2042	BAQ21912.1|0x0p+0|gamma-glutamyl transpeptidase [Allium sativum]	pda:103703439|-207.8|K18592|GGT1_5, CD224; gamma-glutamyltranspeptidase / glutathione hydrolase / leukotriene-C4 hydrolase [EC:2.3.2.2 3.4.19.13 3.4.19.14]|ko00460|Cyanoamino acid metabolism;;ko00480|Glutathione metabolism;;ko00590|Arachidonic acid metabolism;;ko00430|Taurine and hypotaurine metabolism;;	molecular_function:transferase activity, transferring acyl groups(GO:0016746);;molecular_function:hydrolase activity(GO:0016787);;molecular_function:glutathione hydrolase activity(GO:0036374);;cellular_component:apoplast(GO:0048046);;cellular_component:apoplast(GO:0048046);;molecular_function:hypoglycin A gamma-glutamyl transpeptidase activity(GO:0102953);;cellular_component:extracellular region(…	Q680I5|GAGT2_ARATH|-143.4|Glutathione hydrolase 2 OS=Arabidopsis thaliana GN=GGT2 PE=2 SV=1	4641.GSMUA_Achr6P23540_001|-199.8|COG0405|E|gamma-glutamyltransferase activity	PF01019.20|G_glu_transpept|5e-167|Gamma-glutamyltranspeptidase
c69958/f1p38/1873	XP_009394770.1|0x1.08d47ec109ba5p-431|PREDICTED: UDP-glucose 6-dehydrogenase 4 [Musa acuminata subsp. malaccensis]	mus:103980185|-130.6|K00012|UGDH, ugd; UDPglucose 6-dehydrogenase [EC:1.1.1.22]|ko00040|Pentose and glucuronate interconversions;;ko00520|Amino sugar and nucleotide sugar metabolism;;ko00053|Ascorbate and aldarate metabolism;;ko00500|Starch and sucrose metabolism;;	biological_process:oxidation-reduction process(GO:0055114);;molecular_function:UDP-glucose 6-dehydrogenase activity(GO:0003979);;biological_process:UDP-glucuronate biosynthetic process(GO:0006065);;molecular_function:oxidoreductase activity(GO:0016491)	Q2QS14|UGDH4_ORYSJ|-131.3|UDP-glucose 6-dehydrogenase 4 OS=Oryza sativa subsp. japonica GN=UGD4 PE=2 SV=1	4555.Si013662m|-130.7|COG1004|M|UDP-glucose 6-dehydrogenase	PF00984.18|UDPG_MGDP_dh|5.9e-32|UDP-glucose/GDP-mannose dehydrogenase family, central domain
c24805/f1p1173/1763	AHI62680.1|0x1.e66d77e4911f3p-266|polyprotein, partial [Onion yellow dwarf virus]_x0001_AHI62682.1 polyprotein, partial [Onion yellow dwarf virus]_x0001_AHI62683.1 polyprotein, partial [Onion yellow dwarf virus]_x0001_AHI62684.1 polyprotein, partial [Onion yellow dwarf virus]_x0001_AHI62685.1 polyprotein, partial [Onion yellow dwarf virus]	-	-	-	-	PF00767.17|Poty_coat|8.1e-58|Potyvirus coat protein
c30167/f1p11/998	XP_020243387.1|0x1.e4e4ae8d63719p-261|ATPase family AAA domain-containing protein 1-like isoform X2 [Asparagus officinalis]_x0001_ONK79906.1 uncharacterized protein A4U43_C01F11610 [Asparagus officinalis]	-	-	-	4641.GSMUA_Achr11P06710_001|-78.6|COG0464|O|Aaa atpase	-
c15045/f1p369/2573	XP_020265177.1|0x1.2147255cb0decp-189|60S ribosomal protein L28-1-like [Asparagus officinalis]	egu:105047626|-50.2|K02903|RP-L28e, RPL28; large subunit ribosomal protein L28e|ko03010|Ribosome;;	cellular_component:ribosome(GO:0005840);;cellular_component:intracellular ribonucleoprotein complex(GO:0030529)	O82204|RL281_ARATH|-48.7|60S ribosomal protein L28-1 OS=Arabidopsis thaliana GN=RPL28A PE=1 SV=1	4641.GSMUA_Achr6P33480_001|-51.1|ENOG4111T32|J|protein complex subunit organization	PF01778.16|Ribosomal_L28e|2.9e-31|Ribosomal L28e protein family
c271069/f1p4/1262	XP_021820926.1|0x1.331504fd13aabp-488|CBL-interacting serine/threonine-protein kinase 5-like [Prunus avium]	-	cellular_component:nucleus(GO:0005634);;cellular_component:nucleus(GO:0005634);;cellular_component:cytoplasm(GO:0005737);;cellular_component:cytoplasm(GO:0005737);;molecular_function:kinase activity(GO:0016301);;biological_process:phosphorylation(GO:0016310);;molecular_function:transferase activity(GO:0016740);;molecular_function:nucleotide binding(GO:0000166);;molecular_function:protein serine/t…	Q9LZW4|CIPKE_ARATH|-86.8|CBL-interacting serine/threonine-protein kinase 14 OS=Arabidopsis thaliana GN=CIPK14 PE=1 SV=1	3694.POPTR_0006s27940.1|-147.9|COG0515|T|Serine Threonine protein kinase	PF00069.24|Pkinase|8e-59|Protein kinase domain
c41106/f1p12/3578	CAN83392.1|0x1.b2bfb355cb775p-126|hypothetical protein VITISV_041406 [Vitis vinifera]	-	-	-	39947.LOC_Os10g13690.1|-29.3|COG2801|L|Retrotransposon protein	-
c7520/f1p893/2116	XP_020247594.1|0x1.28cfc216ea589p-494|60S ribosomal protein L3 isoform X1 [Asparagus officinalis]_x0001_XP_020247596.1 60S ribosomal protein L3 isoform X2 [Asparagus officinalis]_x0001_XP_020247597.1 60S ribosomal protein L3 isoform X3 [Asparagus officinalis]	sind:105169170|-148.4|K02925|RP-L3e, RPL3; large subunit ribosomal protein L3e|ko03010|Ribosome;;	cellular_component:intracellular ribonucleoprotein complex(GO:0030529);;cellular_component:cytoplasm(GO:0005737);;cellular_component:cytoplasm(GO:0005737);;cellular_component:ribosome(GO:0005840)	P22738|RL32_ARATH|-144.0|60S ribosomal protein L3-2 OS=Arabidopsis thaliana GN=ARP2 PE=2 SV=4	4113.PGSC0003DMT400076546|-146.9|COG0087|J|One of the primary rRNA binding proteins, it binds directly near the 3'-end of the 23S rRNA, where it nucleates assembly of the 50S subunit (By similarity)	PF00297.21|Ribosomal_L3|1.9e-141|Ribosomal protein L3
c220567/f1p26/1421	XP_004962277.1|0x1.b4d77cbefe2b1p-516|elongation factor 1-alpha [Setaria italica]_x0001_XP_004962278.1 elongation factor 1-alpha [Setaria italica]_x0001_XP_004962279.1 elongation factor 1-alpha [Setaria italica]_x0001_KQL15756.1 hypothetical protein SETIT_022033mg [Setaria italica]_x0001_KQL15759.1 hypothetical protein SETIT_022034mg [Setaria italica]_x0001_KQL15760.1 hypothetical protein SETIT_0…	sita:101786159|-155.9|K03231|EEF1A; elongation factor 1-alpha|ko03013|RNA transport;;	cellular_component:cytoplasm(GO:0005737);;cellular_component:cytoplasm(GO:0005737);;biological_process:translation(GO:0006412);;biological_process:translational elongation(GO:0006414);;molecular_function:nucleotide binding(GO:0000166);;molecular_function:translation elongation factor activity(GO:0003746);;molecular_function:GTP binding(GO:0005525)	O64937|EF1A_ORYSJ|-157.5|Elongation factor 1-alpha OS=Oryza sativa subsp. japonica GN=REFA1 PE=2 SV=2	4555.Si022034m|-157.2|COG5256|J|This protein promotes the GTP-dependent binding of aminoacyl-tRNA to the A-site of ribosomes during protein biosynthesis (By similarity)	PF03143.16|GTP_EFTU_D3|7.2e-39|Elongation factor Tu C-terminal domain
c246/f1p17/5190	XP_020265719.1|0x1.04ef04cee6bf8p-148|probable CCR4-associated factor 1 homolog 7 [Asparagus officinalis]_x0001_ONK70429.1 uncharacterized protein A4U43_C05F33640 [Asparagus officinalis]	adu:107470478|-43.9|K12581|CNOT7_8, CAF1, POP2; CCR4-NOT transcription complex subunit 7/8|ko03018|RNA degradation;;	molecular_function:poly(A)-specific ribonuclease activity(GO:0004535);;cellular_component:nucleus(GO:0005634);;cellular_component:nucleus(GO:0005634);;cellular_component:cytoplasm(GO:0005737);;cellular_component:cytoplasm(GO:0005737);;biological_process:transcription, DNA-templated(GO:0006351);;biological_process:regulation of transcription, DNA-templated(GO:0006355);;molecular_function:hydrolase…	Q9SKZ2|CAF1G_ARATH|-44.5|Probable CCR4-associated factor 1 homolog 7 OS=Arabidopsis thaliana GN=CAF1-7 PE=2 SV=2	3847.GLYMA04G06620.1|-45.1|COG5228|K|Ccr4-not transcription complex, subunit	-
c216650/f1p26/1558	XP_020270046.1|0x1.872fc02900ad5p-535|uncharacterized protein LOC109845237 [Asparagus officinalis]_x0001_ONK66117.1 uncharacterized protein A4U43_C06F4320 [Asparagus officinalis]	-	-	-	29760.VIT_11s0016g01110.t01|-139.3|ENOG4111FGG|S|NA	-
c135/f1p11/6342	OEL14243.1|0x1.3048c4ab337fcp-92|Glycine-rich RNA-binding protein 3, mitochondrial [Dichanthelium oligosanthes]	pda:103704472|-28.0|K12741|HNRNPA1_3; heterogeneous nuclear ribonucleoprotein A1/A3|ko03040|Spliceosome;;	molecular_function:protein binding(GO:0005515);;cellular_component:mitochondrion(GO:0005739);;cellular_component:mitochondrion(GO:0005739);;cellular_component:mitochondrion(GO:0005739);;biological_process:mRNA processing(GO:0006397);;biological_process:response to cold(GO:0009409);;biological_process:cytidine to uridine editing(GO:0016554);;molecular_function:RNA binding(GO:0003723);;molecular_fu…	Q9FNR1|RBG3_ARATH|-24.9|Glycine-rich RNA-binding protein 3, mitochondrial OS=Arabidopsis thaliana GN=RBG3 PE=1 SV=1	4558.Sb08g015580.1|-29.4|COG0724|S|Rna-binding protein	-
c25235/f1p15/2139	XP_017700050.1|0x1.0e9b91e27218cp-507|PREDICTED: transcription factor E2FB-like [Phoenix dactylifera]	-	cellular_component:nucleus(GO:0005634);;cellular_component:nucleus(GO:0005634);;cellular_component:cytoplasm(GO:0005737);;cellular_component:cytoplasm(GO:0005737);;biological_process:transcription, DNA-templated(GO:0006351);;biological_process:regulation of transcription, DNA-templated(GO:0006355);;biological_process:cell cycle(GO:0007049);;biological_process:positive regulation of transcription,…	Q9FNY0|E2FA_ARATH|-80.9|Transcription factor E2FA OS=Arabidopsis thaliana GN=E2FA PE=1 SV=1	3711.Bra017268.1-P|-98.8|ENOG410XNYI|K|E2F transcription factor	PF16421.4|E2F_CC-MB|1.9e-34|E2F transcription factor CC-MB domain
c22450/f1p234/3669	ONM32720.1|0x1.7d93cb5e8bd9ap-152|Retrovirus-related Pol polyprotein LINE-1 [Zea mays]	-	-	-	39946.BGIOSGA039499-PA|-37.5|ENOG4110CNM|S|Reverse transcriptase (RNA-dependent DNA polymerase)	-
c111296/f1p70/1580	XP_020247138.1|0x1.56b791e7693eap-195|putative RNA-binding protein Luc7-like 1 isoform X1 [Asparagus officinalis]_x0001_ONK56864.1 uncharacterized protein A4U43_C10F13910 [Asparagus officinalis]	-	-	-	3847.GLYMA18G47910.1|-57.9|COG5200|A|S. cerevisiae	PF03194.14|LUC7|3.9e-32|LUC7 N_terminus
c38124/f1p4/1249	XP_020272904.1|0x1.439b1d5a480a8p-317|putative serine/threonine-protein kinase isoform X3 [Asparagus officinalis]	-	molecular_function:protein serine/threonine kinase activity(GO:0004674);;molecular_function:protein binding(GO:0005515);;molecular_function:ATP binding(GO:0005524);;cellular_component:plasma membrane(GO:0005886);;cellular_component:plasma membrane(GO:0005886);;cellular_component:plasma membrane(GO:0005886);;biological_process:response to insect(GO:0009625);;cellular_component:membrane(GO:0016020)…	Q93YN1|CRPK1_ARATH|-71.5|Cold-responsive protein kinase 1 OS=Arabidopsis thaliana GN=CRPK1 PE=1 SV=1	29760.VIT_08s0040g01930.t01|-80.0|COG0515|T|Serine Threonine protein kinase	PF00069.24|Pkinase|1.6e-37|Protein kinase domain
c4077/f1p165/3870	AMJ52091.1|0x0p+0|heat shock cognate 70 kDa protein 2-like protein [Solanum melongena]	zma:103639924|-10000.0|K03283|HSPA1_8; heat shock 70kDa protein 1/8|ko04141|Protein processing in endoplasmic reticulum;;ko03040|Spliceosome;;ko04144|Endocytosis;;	molecular_function:nucleotide binding(GO:0000166);;molecular_function:ATP binding(GO:0005524)	P27322|HSP72_SOLLC|-10000.0|Heat shock cognate 70 kDa protein 2 OS=Solanum lycopersicum GN=HSC-2 PE=2 SV=1	4577.GRMZM2G056039_P01|-10000.0|COG0443|O|Heat shock protein	PF00012.19|HSP70|3.1e-260|Hsp70 protein
c27884/f1p72/1305	XP_020107946.1|0x1.37db35804d753p-223|protein transport protein SEC31 homolog B [Ananas comosus]	pda:103716930|-66.1|K14005|SEC31; protein transport protein SEC31|ko04141|Protein processing in endoplasmic reticulum;;	cellular_component:Golgi apparatus(GO:0005794);;biological_process:protein transport(GO:0015031);;biological_process:vesicle-mediated transport(GO:0016192);;cellular_component:endoplasmic reticulum(GO:0005783);;cellular_component:endoplasmic reticulum(GO:0005783);;cellular_component:Golgi apparatus(GO:0005794)	Q8L611|SC31B_ARATH|-52.9|Protein transport protein SEC31 homolog B OS=Arabidopsis thaliana GN=SEC31B PE=1 SV=1	29760.VIT_13s0158g00140.t01|-62.0|ENOG410XQ1D|U|Component of the coat protein complex II (COPII) which promotes the formation of transport vesicles from the endoplasmic reticulum (ER). The coat has two main functions, the physical deformation of the endoplasmic reticulum membrane into vesicles and the selection of cargo molecules	-
c29864/f1p24/3031	XP_008789735.1|0x0p+0|PREDICTED: helicase sen1-like [Phoenix dactylifera]_x0001_XP_008789758.1 PREDICTED: helicase sen1-like [Phoenix dactylifera]_x0001_XP_008789766.1 PREDICTED: helicase sen1-like [Phoenix dactylifera]_x0001_XP_008789773.1 PREDICTED: helicase sen1-like [Phoenix dactylifera]_x0001_XP_008789795.1 PREDICTED: helicase sen1-like [Phoenix dactylifera]_x0001_XP_017698242.1 PREDICTED: h…	-	-	-	29760.VIT_18s0001g05110.t01|-10000.0|COG1112|L|Helicase	PF13086.5|AAA_11|7.9e-66|AAA domain
c16431/f1p177/2486	XP_010934670.1|0x1.2a5890850a394p-335|PREDICTED: tubulin alpha-3 chain [Elaeis guineensis]	egu:105054774|-101.6|K07374|TUBA; tubulin alpha|ko04145|Phagosome;;	cellular_component:cytoskeleton(GO:0005856);;cellular_component:cytoskeleton(GO:0005856);;cellular_component:microtubule(GO:0005874);;molecular_function:nucleotide binding(GO:0000166);;molecular_function:GTP binding(GO:0005525);;cellular_component:cytoplasm(GO:0005737)	O22349|TBA3_ELEIN|-102.5|Tubulin alpha-3 chain OS=Eleusine indica GN=TUBA3 PE=2 SV=1	15368.BRADI1G23770.1|-101.0|COG5023|Z|protein polymerization	PF03953.16|Tubulin_C|8.4e-47|Tubulin C-terminal domain
c179209/f1p11/1776	2HOR_A|0x1.2046f5baab205p-623|Chain A, Crystal Structure Of Alliinase From Garlic- Apo Form_x0001_2HOX_A Chain A, Alliinase From Allium Sativum (garlic)_x0001_2HOX_B Chain B, Alliinase From Allium Sativum (garlic)_x0001_2HOX_C Chain C, Alliinase From Allium Sativum (garlic)_x0001_2HOX_D Chain D, Alliinase From Allium Sativum (garlic)	-	molecular_function:alliin lyase activity(GO:0047654);;cellular_component:vacuole(GO:0005773);;cellular_component:vacuole(GO:0005773);;molecular_function:lyase activity(GO:0016829)	Q01594|ALLN1_ALLSA|-190.2|Alliin lyase 1 OS=Allium sativum PE=1 SV=1	29760.VIT_18s0157g00140.t01|-82.0|ENOG410XS9Z|S|tryptophan aminotransferase-related protein 4-like	PF04864.12|Alliinase_C|5.9e-153|Allinase
c35307/f1p20/2184	PKA48753.1|0x1.4fc47bda98072p-64|hypothetical protein AXF42_Ash018695 [Apostasia shenzhenica]	-	-	-	-	PF11145.7|DUF2921|7.6e-35|Protein of unknown function (DUF2921)
c27660/f1p0/1067	XP_020254721.1|0x1.24068949b1653p-265|uncharacterized protein LOC109831735 [Asparagus officinalis]_x0001_XP_020254722.1 uncharacterized protein LOC109831735 [Asparagus officinalis]_x0001_ONK78553.1 uncharacterized protein A4U43_C02F20040 [Asparagus officinalis]	-	-	-	4555.Si001593m|-78.8|COG5018|S|ERI1 exoribonuclease family member	-
c23405/f1p60/2465	AAK95661.1|0x1.026f847ef525ep-200|alliinase, partial [Allium sativum]	-	molecular_function:alliin lyase activity(GO:0047654);;cellular_component:vacuole(GO:0005773);;cellular_component:vacuole(GO:0005773);;molecular_function:lyase activity(GO:0016829)	Q01594|ALLN1_ALLSA|-63.3|Alliin lyase 1 OS=Allium sativum PE=1 SV=1	4555.Si001197m|-22.9|ENOG410XS9Z|S|tryptophan aminotransferase-related protein 4-like	PF04864.12|Alliinase_C|2.4e-36|Allinase
c25642/f1p0/1216	GAY60956.1|0x1.00d4dfb90a9cfp-82|hypothetical protein CUMW_206100 [Citrus unshiu]_x0001_GAY60957.1 hypothetical protein CUMW_206100 [Citrus unshiu]	-	-	-	-	-
c9573/f1p7/2625	XP_020265178.1|0x1.42d1a69723008p-188|RWD domain-containing protein 1 [Asparagus officinalis]_x0001_ONK69986.1 uncharacterized protein A4U43_C05F29020 [Asparagus officinalis]	-	-	-	29760.VIT_09s0002g02540.t01|-55.4|ENOG410XT0M|S|RWD domain containing	-
c120297/f1p2/1521	XP_020106510.1|0x1.c5f2e21cde34fp-604|probable DNA primase large subunit isoform X2 [Ananas comosus]_x0001_XP_020106511.1 probable DNA primase large subunit isoform X2 [Ananas comosus]	osa:4342990|-179.5|K02685|PRI2; DNA primase large subunit [EC:2.7.7.-]|ko00230|Purine metabolism;;ko00240|Pyrimidine metabolism;;ko03030|DNA replication;;	biological_process:DNA replication, synthesis of RNA primer(GO:0006269);;molecular_function:transferase activity(GO:0016740);;molecular_function:nucleotidyltransferase activity(GO:0016779);;molecular_function:metal ion binding(GO:0046872);;molecular_function:iron-sulfur cluster binding(GO:0051536);;molecular_function:4 iron, 4 sulfur cluster binding(GO:0051539);;molecular_function:DNA binding(GO:…	Q84WJ2|PRI2_ARATH|-161.7|Probable DNA primase large subunit OS=Arabidopsis thaliana GN=At1g67320 PE=2 SV=2	39946.BGIOSGA024439-PA|-180.8|COG2219|L|DNA primase is the polymerase that synthesizes small RNA primers for the Okazaki fragments on both template strands at replication forks during chromosomal DNA synthesis (By similarity)	PF04104.13|DNA_primase_lrg|1.7e-91|Eukaryotic and archaeal DNA primase, large subunit
c20432/f1p9/1080	XP_020247055.1|0x1.54b10cdfe5be3p-269|cytochrome P450 71A9-like [Asparagus officinalis]_x0001_ONK57597.1 uncharacterized protein A4U43_C09F2120 [Asparagus officinalis]	-	cellular_component:integral component of membrane(GO:0016021);;molecular_function:oxidoreductase activity(GO:0016491);;molecular_function:metal ion binding(GO:0046872);;biological_process:oxidation-reduction process(GO:0055114);;molecular_function:monooxygenase activity(GO:0004497);;cellular_component:membrane(GO:0016020);;cellular_component:membrane(GO:0016020)	O81970|C71A9_SOYBN|-63.5|Cytochrome P450 71A9 OS=Glycine max GN=CYP71A9 PE=2 SV=1	29760.VIT_18s0001g13790.t01|-68.7|COG2124|Q|Cytochrome p450	PF00067.21|p450|7.9e-60|Cytochrome P450
c195735/f1p7/1843	AMD40258.1|0x1.9093fc455f535p-553|gonidialess A related factor [Agave tequilana]	-	-	-	15368.BRADI5G07300.1|-161.4|COG5269|K|Transcription factor	-
c230511/f1p90/1481	XP_008808875.1|0x1.29c3e5e2552a1p-443|PREDICTED: E3 ubiquitin-protein ligase MIEL1-like [Phoenix dactylifera]_x0001_XP_008808883.1 PREDICTED: E3 ubiquitin-protein ligase MIEL1-like [Phoenix dactylifera]_x0001_XP_008808892.1 PREDICTED: E3 ubiquitin-protein ligase MIEL1-like [Phoenix dactylifera]	pda:103720768|-134.1|K10144|RCHY1, PIRH2; RING finger and CHY zinc finger domain-containing protein 1 [EC:2.3.2.27]|ko04120|Ubiquitin mediated proteolysis;;	molecular_function:transferase activity(GO:0016740);;molecular_function:metal ion binding(GO:0046872);;cellular_component:nucleus(GO:0005634);;cellular_component:nucleus(GO:0005634);;biological_process:protein ubiquitination(GO:0016567)	Q5JL96|ZFP34_ORYSJ|-122.7|Probable E3 ubiquitin-protein ligase RZFP34 OS=Oryza sativa subsp. japonica GN=RZFP34 PE=2 SV=1	3694.POPTR_0006s26180.1|-128.0|ENOG410XXHF|S|ring finger and CHY zinc finger	-
c24424/f1p126/3662	XP_020242367.1|0x1.9e6a626994df7p-722|CHD3-type chromatin-remodeling factor PICKLE [Asparagus officinalis]_x0001_ONK60438.1 uncharacterized protein A4U43_C08F18460 [Asparagus officinalis]	-	molecular_function:ATP binding(GO:0005524);;cellular_component:nucleus(GO:0005634);;cellular_component:nucleus(GO:0005634);;biological_process:covalent chromatin modification(GO:0016569);;molecular_function:hydrolase activity(GO:0016787);;molecular_function:nucleotide binding(GO:0000166);;molecular_function:DNA binding(GO:0003677);;molecular_function:helicase activity(GO:0004386)	F4JTF6|CHR7_ARATH|-46.1|CHD3-type chromatin-remodeling factor CHR7 OS=Arabidopsis thaliana GN=CHR7 PE=3 SV=1	4641.GSMUA_Achr4P21270_001|-145.5|COG0553|L|helicase	PF06461.10|DUF1086|1.2e-50|Domain of Unknown Function (DUF1086)
c2764/f1p34/4490	XP_020259688.1|0x1.5a8325e4789p-107|protein FAR1-RELATED SEQUENCE 5-like [Asparagus officinalis]	-	-	-	-	-
c32301/f1p25/3351	XP_020595276.1|0x1.84c40f15ab246p-705|probable serine/threonine-protein kinase At4g35230 [Phalaenopsis equestris]	jcu:105646432|-212.7|K14500|BSK; BR-signaling kinase [EC:2.7.11.1]|ko04075|Plant hormone signal transduction;;	molecular_function:transferase activity(GO:0016740);;molecular_function:protein binding(GO:0005515);;biological_process:defense response to bacterium(GO:0042742);;molecular_function:protein binding(GO:0005515);;biological_process:defense response to fungus(GO:0050832);;molecular_function:protein binding(GO:0005515);;molecular_function:protein binding(GO:0005515);;molecular_function:protein bindin…	Q944A7|Y4523_ARATH|-207.3|Probable serine/threonine-protein kinase At4g35230 OS=Arabidopsis thaliana GN=At4g35230 PE=1 SV=1	3694.POPTR_0004s19340.1|-212.3|ENOG410YDRD|T|STYKc	-
c21020/f2p33/2424	XP_009609390.1|0x1.ad18b9083a478p-624|PREDICTED: stromal 70 kDa heat shock-related protein, chloroplastic-like [Nicotiana tomentosiformis]_x0001_XP_016471792.1 PREDICTED: stromal 70 kDa heat shock-related protein, chloroplastic-like [Nicotiana tabacum]	-	cellular_component:plastid(GO:0009536);;cellular_component:chloroplast stroma(GO:0009570);;molecular_function:nucleotide binding(GO:0000166);;molecular_function:ATP binding(GO:0005524);;cellular_component:chloroplast(GO:0009507)	Q02028|HSP7S_PEA|-184.7|Stromal 70 kDa heat shock-related protein, chloroplastic OS=Pisum sativum GN=HSP70 PE=2 SV=1	3694.POPTR_0022s00530.1|-187.2|COG0443|O|Heat shock protein	PF00012.19|HSP70|2.9e-130|Hsp70 protein
c28743/f1p3/3458	XP_021887206.1|0x1.622114eaf5f9cp-66|inactive poly [ADP-ribose] polymerase RCD1-like [Carica papaya]	-	-	-	4513.MLOC_56445.3|-65.7|ENOG4111NY1|S|inactive poly ADP-ribose polymerase	-
c31454/f1p120/3728	XP_020247150.1|0x1.1a6eced52db8cp-908|peroxisomal fatty acid beta-oxidation multifunctional protein [Asparagus officinalis]_x0001_ONK80432.1 uncharacterized protein A4U43_C01F17660 [Asparagus officinalis]	mus:103991664|-255.3|K10527|MFP2; enoyl-CoA hydratase/3-hydroxyacyl-CoA dehydrogenase [EC:4.2.1.17 1.1.1.35 1.1.1.211]|ko01212|Fatty acid metabolism;;ko00592|alpha-Linolenic acid metabolism;;ko00071|Fatty acid degradation;;	molecular_function:isomerase activity(GO:0016853);;biological_process:fatty acid metabolic process(GO:0006631);;molecular_function:3-hydroxyacyl-CoA dehydrogenase activity(GO:0003857);;molecular_function:3-hydroxyacyl-CoA dehydratase activity(GO:0018812);;biological_process:fatty acid beta-oxidation(GO:0006635);;molecular_function:dodecenoyl-CoA delta-isomerase activity(GO:0004165);;biological_pr…	Q8W1L6|MFP_ORYSJ|-242.7|Peroxisomal fatty acid beta-oxidation multifunctional protein OS=Oryza sativa subsp. japonica GN=MFP PE=1 SV=2	4641.GSMUA_Achr7P14420_001|-256.5|COG1250|I|Dehydrogenase	PF02737.17|3HCDH_N|5.4e-58|3-hydroxyacyl-CoA dehydrogenase, NAD binding domain
c33587/f1p8/2950	ONK63319.1|0x1.fbab9dbf31e73p-338|uncharacterized protein A4U43_C07F13780 [Asparagus officinalis]	-	cellular_component:cytoplasm(GO:0005737);;biological_process:mRNA catabolic process(GO:0006402);;biological_process:defense response(GO:0006952);;biological_process:flower development(GO:0009908);;cellular_component:intracellular ribonucleoprotein complex(GO:0030529);;biological_process:regulation of photoperiodism, flowering(GO:2000028);;molecular_function:RNA binding(GO:0003723);;molecular_func…	Q8LFS6|BRN1L_ARATH|-37.9|RNA-binding protein BRN1 OS=Arabidopsis thaliana GN=BRN1 PE=2 SV=1	4081.Solyc09g074360.2.1|-90.5|ENOG410XNTW|S|CUGBP, Elav-like family member	-
c269276/f1p7/1117	XP_020271213.1|0x1.51d978183769fp-101|LOW QUALITY PROTEIN: BURP domain-containing protein 6-like [Asparagus officinalis]	-	-	Q08298|RD22_ARATH|-26.6|BURP domain protein RD22 OS=Arabidopsis thaliana GN=RD22 PE=2 SV=1	3702.AT5G25610.1|-25.5|ENOG410YDUK|S|BURP domain	PF03181.14|BURP|3.4e-34|BURP domain
c27272/f1p90/3385	XP_020240984.1|0x1.7ea937f048465p-380|obg-like ATPase 1 [Asparagus officinalis]_x0001_ONK61408.1 uncharacterized protein A4U43_C08F29600 [Asparagus officinalis]	-	biological_process:negative regulation of response to salt stress(GO:1901001);;molecular_function:protein binding(GO:0005515);;molecular_function:ATP binding(GO:0005524);;molecular_function:GTP binding(GO:0005525);;cellular_component:cytoplasm(GO:0005737);;cellular_component:cytoplasm(GO:0005737);;cellular_component:cytosol(GO:0005829);;cellular_component:cytosol(GO:0005829);;cellular_component:p…	Q6Z1J6|OLA1_ORYSJ|-109.6|Obg-like ATPase 1 OS=Oryza sativa subsp. japonica GN=YchF1 PE=1 SV=1	4641.GSMUA_Achr8P07170_001|-114.0|COG0012|J|gtp-binding protein	PF06071.12|YchF-GTPase_C|8e-41|Protein of unknown function (DUF933)
c25681/f1p8/1854	ONK59043.1|0x1.7d4a38c4ad4d3p-199|uncharacterized protein A4U43_C08F2380 [Asparagus officinalis]	-	biological_process:lipid transport(GO:0006869);;molecular_function:lipid binding(GO:0008289)	Q940Y1|ORP2A_ARATH|-52.6|Oxysterol-binding protein-related protein 2A OS=Arabidopsis thaliana GN=ORP2A PE=2 SV=1	4641.GSMUA_Achr11P21100_001|-59.1|ENOG410XP9E|S|Oxysterol-binding protein	PF01237.17|Oxysterol_BP|3.4e-33|Oxysterol-binding protein
c32794/f1p17/3013	XP_020251816.1|0x1.386564e91fb9fp-637|multicopper oxidase LPR2-like [Asparagus officinalis]_x0001_ONK81458.1 uncharacterized protein A4U43_C01F29300 [Asparagus officinalis]	-	molecular_function:oxidoreductase activity(GO:0016491);;molecular_function:metal ion binding(GO:0046872);;biological_process:oxidation-reduction process(GO:0055114);;cellular_component:endoplasmic reticulum(GO:0005783);;cellular_component:endoplasmic reticulum membrane(GO:0005789);;cellular_component:membrane(GO:0016020)	F4I4K5|LPR1_ARATH|-157.0|Multicopper oxidase LPR1 OS=Arabidopsis thaliana GN=LPR1 PE=2 SV=1	29760.VIT_01s0011g04740.t01|-159.9|COG2132|Q|Multicopper oxidase	-
c154412/f1p6/1603	BAD06448.1|0x1.76a107159ed8ap-490|alliinase-like [Allium cepa]	-	molecular_function:alliin lyase activity(GO:0047654);;cellular_component:vacuole(GO:0005773);;cellular_component:vacuole(GO:0005773);;molecular_function:lyase activity(GO:0016829)	P31756|ALLN_ALLCG|-135.3|Alliin lyase (Fragment) OS=Allium cepa var. aggregatum PE=2 SV=1	4641.GSMUA_Achr4P00820_001|-75.3|ENOG410XS9Z|S|tryptophan aminotransferase-related protein 4-like	PF04864.12|Alliinase_C|1.2e-153|Allinase
c6376/f1p6/1009	ONK79920.1|0x1.3e3af2f79e7a6p-237|uncharacterized protein A4U43_C01F11820 [Asparagus officinalis]	-	biological_process:carbohydrate metabolic process(GO:0005975);;biological_process:metabolic process(GO:0008152);;molecular_function:beta-amylase activity(GO:0016161);;molecular_function:hydrolase activity(GO:0016787);;molecular_function:hydrolase activity, acting on glycosyl bonds(GO:0016798);;molecular_function:amylopectin maltohydrolase activity(GO:0102229);;biological_process:polysaccharide ca…	Q9FH80|BAM8_ARATH|-60.7|Beta-amylase 8 OS=Arabidopsis thaliana GN=BAM8 PE=1 SV=1	29760.VIT_02s0087g00440.t01|-72.0|ENOG410YA7C|S|beta-amylase	-
c1145/f1p28/2103	XP_020277193.1|0x1.32e5b3b982c4p-344|linoleate 9S-lipoxygenase 6-like [Asparagus officinalis]	pda:103697518|-89.9|K15718|LOX1_5; linoleate 9S-lipoxygenase [EC:1.13.11.58]|ko00591|Linoleic acid metabolism;;	biological_process:fatty acid metabolic process(GO:0006631);;biological_process:fatty acid biosynthetic process(GO:0006633);;molecular_function:oxidoreductase activity(GO:0016491);;biological_process:oxylipin biosynthetic process(GO:0031408);;biological_process:oxylipin biosynthetic process(GO:0031408);;molecular_function:metal ion binding(GO:0046872);;molecular_function:dioxygenase activity(GO:0…	Q43191|LOX15_SOLTU|-90.6|Probable linoleate 9S-lipoxygenase 5 OS=Solanum tuberosum GN=LOX1.5 PE=2 SV=1	29760.VIT_14s0128g00790.t01|-89.9|ENOG410YN4N|S|Plant lipoxygenase may be involved in a number of diverse aspects of plant physiology including growth and development, pest resistance, and senescence or responses to wounding (By similarity)	PF00305.18|Lipoxygenase|6.6e-107|Lipoxygenase
c33341/f1p82/2839	XP_020250207.1|0x1.4dceb9be3f161p-492|protein NUCLEAR FUSION DEFECTIVE 4-like [Asparagus officinalis]_x0001_ONK55259.1 uncharacterized protein A4U43_UnF5790 [Asparagus officinalis]	-	-	-	4113.PGSC0003DMT400031414|-138.6|ENOG410Y7MY|S|nodulin family	-
c22351/f1p24/2678	XP_010924233.1|0x0p+0|PREDICTED: conserved oligomeric Golgi complex subunit 5 [Elaeis guineensis]	-	-	-	4641.GSMUA_Achr3P08720_001|-10000.0|ENOG410XWH0|S|Component of oligomeric golgi complex 5	-
c81/f1p73/4210	XP_020249394.1|0x1.faab68f3bc749p-701|serine hydroxymethyltransferase 3, chloroplastic isoform X1 [Asparagus officinalis]_x0001_ONK80741.1 uncharacterized protein A4U43_C01F21200 [Asparagus officinalis]	mus:103968848|-205.2|K00600|glyA, SHMT; glycine hydroxymethyltransferase [EC:2.1.2.1]|ko00260|Glycine, serine and threonine metabolism;;ko01200|Carbon metabolism;;ko00630|Glyoxylate and dicarboxylate metabolism;;ko00460|Cyanoamino acid metabolism;;ko00670|One carbon pool by folate;;ko01230|Biosynthesis of amino acids;;	cellular_component:chloroplast(GO:0009507);;cellular_component:plastid(GO:0009536);;molecular_function:transferase activity(GO:0016740);;biological_process:tetrahydrofolate interconversion(GO:0035999);;molecular_function:glycine hydroxymethyltransferase activity(GO:0004372);;biological_process:one-carbon metabolic process(GO:0006730);;cellular_component:chloroplast(GO:0009507)	Q94JQ3|GLYP3_ARATH|-203.5|Serine hydroxymethyltransferase 3, chloroplastic OS=Arabidopsis thaliana GN=SHM3 PE=1 SV=2	3694.POPTR_0006s24840.1|-205.3|COG0112|E|Catalyzes the reversible interconversion of serine and glycine with tetrahydrofolate (THF) serving as the one-carbon carrier. This reaction serves as the major source of one-carbon groups required for the biosynthesis of purines, thymidylate, methionine, and other important biomolecules. Also exhibits THF- independent aldolase activity toward beta-hydroxya…	PF00464.18|SHMT|9e-173|Serine hydroxymethyltransferase
c235131/f1p3/1245	XP_010907994.1|0x1.15c169f515ab5p-489|PREDICTED: probable sugar phosphate/phosphate translocator At3g11320 isoform X2 [Elaeis guineensis]	-	cellular_component:integral component of membrane(GO:0016021);;biological_process:carbohydrate transport(GO:0008643);;cellular_component:membrane(GO:0016020);;cellular_component:membrane(GO:0016020)	Q6DBP3|PT505_ARATH|-144.9|Probable sugar phosphate/phosphate translocator At5g05820 OS=Arabidopsis thaliana GN=At5g05820 PE=2 SV=1	4641.GSMUA_Achr7P22640_001|-148.7|ENOG410XP1S|S|solute carrier family 35 member	PF03151.15|TPT|7.3e-49|Triose-phosphate Transporter family
c11826/f1p3/2220	XP_020244619.1|0x1.3f613482c4952p-357|uncharacterized protein LOC109822786 [Asparagus officinalis]	-	-	-	3694.POPTR_0006s26130.1|-86.2|ENOG410XRV7|S|Zinc finger, FYVE domain containing 26	-
c30453/f1p18/2902	ONK59481.1|0x1.c524d996d3535p-152|uncharacterized protein A4U43_C08F6870 [Asparagus officinalis]	-	molecular_function:poly(A)-specific ribonuclease activity(GO:0004535);;cellular_component:nucleus(GO:0005634);;cellular_component:nucleus(GO:0005634);;cellular_component:cytoplasm(GO:0005737);;cellular_component:cytoplasm(GO:0005737);;biological_process:transcription, DNA-templated(GO:0006351);;biological_process:regulation of transcription, DNA-templated(GO:0006355);;molecular_function:hydrolase…	Q8VYU4|CCR4F_ARATH|-32.3|Carbon catabolite repressor protein 4 homolog 6 OS=Arabidopsis thaliana GN=CCR4-6 PE=2 SV=2	39946.BGIOSGA001225-PA|-43.7|COG5239|A|Ccr4-NOT transcription complex, subunit	-
c119971/f1p35/1424	XP_020273021.1|0x1.0b1b4037d1c3ep-222|serine/threonine-protein kinase SAPK10 [Asparagus officinalis]	dosa:Os03t0610900-01|-67.0|K14498|SNRK2; serine/threonine-protein kinase SRK2 [EC:2.7.11.1]|ko04075|Plant hormone signal transduction;;	biological_process:abscisic acid-activated signaling pathway(GO:0009738);;molecular_function:kinase activity(GO:0016301);;biological_process:phosphorylation(GO:0016310);;molecular_function:transferase activity(GO:0016740);;molecular_function:nucleotide binding(GO:0000166);;molecular_function:protein serine/threonine kinase activity(GO:0004674);;molecular_function:ATP binding(GO:0005524)	Q75H77|SAPKA_ORYSJ|-69.4|Serine/threonine-protein kinase SAPK10 OS=Oryza sativa subsp. japonica GN=SAPK10 PE=2 SV=1	4538.ORGLA03G0240100.1|-68.3|COG0515|T|Serine Threonine protein kinase	-
c28992/f1p116/2557	XP_020250149.1|0x1.3333b9eb2082p-299|homeobox-leucine zipper protein HAT5-like [Asparagus officinalis]_x0001_ONK80851.1 uncharacterized protein A4U43_C01F22480 [Asparagus officinalis]	-	cellular_component:nucleus(GO:0005634);;cellular_component:nucleus(GO:0005634);;biological_process:transcription, DNA-templated(GO:0006351);;biological_process:regulation of transcription, DNA-templated(GO:0006355);;biological_process:multicellular organism development(GO:0007275);;molecular_function:DNA binding(GO:0003677);;molecular_function:DNA binding(GO:0003677);;molecular_function:protein b…	Q02283|HAT5_ARATH|-33.5|Homeobox-leucine zipper protein HAT5 OS=Arabidopsis thaliana GN=HAT5 PE=1 SV=1	3847.GLYMA01G04890.1|-52.1|ENOG410Z2UE|K|homeobox-leucine zipper protein	-
c42617/f2p4/2033	XP_010926938.1|0x1.a56ada2f3f82ap-748|PREDICTED: probable receptor-like protein kinase At1g30570 [Elaeis guineensis]	-	cellular_component:plasma membrane(GO:0005886);;cellular_component:plasma membrane(GO:0005886);;cellular_component:membrane(GO:0016020);;cellular_component:integral component of membrane(GO:0016021);;molecular_function:kinase activity(GO:0016301);;biological_process:phosphorylation(GO:0016310);;molecular_function:transferase activity(GO:0016740);;molecular_function:nucleotide binding(GO:0000166);…	Q9SA72|Y1357_ARATH|-193.6|Probable receptor-like protein kinase At1g30570 OS=Arabidopsis thaliana GN=At1g30570 PE=3 SV=1	4533.OB04G32500.1|-216.2|COG0515|T|Serine Threonine protein kinase	PF07714.16|Pkinase_Tyr|3e-47|Protein tyrosine kinase
c3079/f1p21/4076	XP_020255590.1|0x1.5f0f813d123b1p-170|DNA-directed RNA polymerases IV and V subunit 2-like [Asparagus officinalis]	-	molecular_function:DNA-directed 5'-3' RNA polymerase activity(GO:0003899);;cellular_component:nucleus(GO:0005634);;cellular_component:nucleus(GO:0005634);;cellular_component:nucleus(GO:0005634);;biological_process:regulation of transcription, DNA-templated(GO:0006355);;molecular_function:transferase activity(GO:0016740);;molecular_function:nucleotidyltransferase activity(GO:0016779);;molecular_fu…	Q9LV32|RPD2B_ARATH|-36.2|DNA-directed RNA polymerase D subunit 2b OS=Arabidopsis thaliana GN=NRPD2b PE=2 SV=1	4641.GSMUA_Achr8P17010_001|-48.7|COG0085|K|DNA-dependent RNA polymerase catalyzes the transcription of DNA into RNA using the four ribonucleoside triphosphates as substrates (By similarity)	-
c4915/f1p11/1214	XP_008787861.1|0x1.cac6cc25abe27p-71|PREDICTED: nuclear transcription factor Y subunit A-6-like [Phoenix dactylifera]	-	-	-	-	-
c28034/f1p29/3667	XP_020261107.1|0x1.86ea131497e6fp-234|la protein 1-like [Asparagus officinalis]_x0001_ONK72032.1 uncharacterized protein A4U43_C04F14980 [Asparagus officinalis]	-	cellular_component:nucleolus(GO:0005730);;cellular_component:nucleolus(GO:0005730);;biological_process:ncRNA processing(GO:0034470);;molecular_function:RNA binding(GO:0003723);;cellular_component:nucleus(GO:0005634);;cellular_component:nucleoplasm(GO:0005654)	Q93ZV7|LA1_ARATH|-60.5|La protein 1 OS=Arabidopsis thaliana GN=LA1 PE=1 SV=1	4558.Sb06g021470.1|-66.6|COG5193|JO|La ribonucleoprotein domain family member	-
c236386/f1p13/1655	XP_008784639.1|0x1.10d72de894651p-248|PREDICTED: UMP-CMP kinase [Phoenix dactylifera]	egu:105043268|-75.4|K13800|CMPK1, UMPK; UMP-CMP kinase [EC:2.7.4.- 2.7.4.14]|ko00240|Pyrimidine metabolism;;	cellular_component:nucleus(GO:0005634);;cellular_component:nucleus(GO:0005634);;cellular_component:cytoplasm(GO:0005737);;cellular_component:cytoplasm(GO:0005737);;biological_process:pyrimidine nucleotide biosynthetic process(GO:0006221);;molecular_function:kinase activity(GO:0016301);;biological_process:phosphorylation(GO:0016310);;molecular_function:transferase activity(GO:0016740);;molecular_f…	Q6NMK6|KCY2_ARATH|-73.4|Probable UMP-CMP kinase 2 OS=Arabidopsis thaliana GN=UMK2 PE=2 SV=1	59689.fgenesh1_pg.C_scaffold_7001430|-72.3|ENOG410Z7Z7|S|Pentatricopeptide repeat-containing protein	PF00406.21|ADK|5.2e-45|Adenylate kinase
c17884/f1p846/3320	Q944U4.1|0x1.4f40fb60ca7d8p-546|RecName: Full=S-adenosylmethionine synthase; Short=AdoMet synthase; AltName: Full=Methionine adenosyltransferase; Short=MAT_x0001_AAL16064.1 S-adenosyl-L-methionine synthetase [Dendrobium crumenatum]	vra:106768358|-165.0|K00789|metK; S-adenosylmethionine synthetase [EC:2.5.1.6]|ko01230|Biosynthesis of amino acids;;ko00270|Cysteine and methionine metabolism;;	cellular_component:cytoplasm(GO:0005737);;cellular_component:cytoplasm(GO:0005737);;biological_process:S-adenosylmethionine biosynthetic process(GO:0006556);;biological_process:one-carbon metabolic process(GO:0006730);;molecular_function:transferase activity(GO:0016740);;molecular_function:metal ion binding(GO:0046872);;molecular_function:nucleotide binding(GO:0000166);;molecular_function:methion…	Q944U4|METK_DENCR|-167.5|S-adenosylmethionine synthase OS=Dendrobium crumenatum GN=SAMS PE=2 SV=1	3847.GLYMA15G21890.1|-166.1|COG0192|H|Catalyzes the formation of S-adenosylmethionine from methionine and ATP	PF02772.15|S-AdoMet_synt_M|7.7e-47|S-adenosylmethionine synthetase, central domain
c281844/f1p42/1682	XP_020092254.1|0x1.72491ecf77a6p-177|bystin [Ananas comosus]_x0001_XP_020092256.1 bystin [Ananas comosus]	-	-	-	15368.BRADI5G26400.1|-48.1|ENOG410XPH5|S|K14797 essential nuclear protein 1	PF05291.10|Bystin|1.3e-40|Bystin
c188452/f1p12/1176	XP_020246728.1|0x1.6adb22027a895p-177|clavaminate synthase-like protein At3g21360 [Asparagus officinalis]_x0001_ONK80375.1 uncharacterized protein A4U43_C01F16990 [Asparagus officinalis]	-	molecular_function:oxidoreductase activity(GO:0016491);;molecular_function:metal ion binding(GO:0046872);;biological_process:oxidation-reduction process(GO:0055114)	Q9LIG0|Y3136_ARATH|-45.7|Clavaminate synthase-like protein At3g21360 OS=Arabidopsis thaliana GN=At3g21360 PE=1 SV=1	4641.GSMUA_Achr11P12340_001|-48.0|ENOG410XPT7|S|taurine catabolism dioxygenase taud tfda	-
c5182/f1p3/1269	ONK67529.1|0x1.5c0a964c9fb2ep-293|uncharacterized protein A4U43_C05F990 [Asparagus officinalis]	-	-	-	4641.GSMUA_Achr11P11800_001|-86.4|ENOG410YFCF|O|Lipase (class 3)	PF01764.24|Lipase_3|4.5e-33|Lipase (class 3)
c3217/f1p68/4093	XP_020274276.1|0x1.83c19c3373a42p-488|LOW QUALITY PROTEIN: DNA helicase INO80-like [Asparagus officinalis]	-	molecular_function:ATP binding(GO:0005524);;cellular_component:nucleus(GO:0005634);;cellular_component:nucleus(GO:0005634);;biological_process:DNA repair(GO:0006281);;biological_process:transcription, DNA-templated(GO:0006351);;biological_process:regulation of transcription, DNA-templated(GO:0006355);;biological_process:cellular response to DNA damage stimulus(GO:0006974);;biological_process:cova…	Q8RXS6|INO80_ARATH|-112.5|DNA helicase INO80 OS=Arabidopsis thaliana GN=INO80 PE=2 SV=2	3847.GLYMA19G31720.1|-118.3|ENOG410XP0A|L|chromatin modification	-
c280885/f1p22/1247	CAB06081.1|0x1.12cd3e5f2d991p-150|UDP-glucose:sterol glucosyltransferase [Avena sativa]	-	biological_process:sterol biosynthetic process(GO:0016126);;molecular_function:transferase activity(GO:0016740);;molecular_function:transferase activity, transferring glycosyl groups(GO:0016757);;molecular_function:sterol 3-beta-glucosyltransferase activity(GO:0016906);;molecular_function:soladodine glucosyltransferase activity(GO:0102202);;molecular_function:brassicasterol glucosyltransferase ac…	Q9M8Z7|U80A2_ARATH|-45.2|Sterol 3-beta-glucosyltransferase UGT80A2 OS=Arabidopsis thaliana GN=UGT80A2 PE=1 SV=1	4513.MLOC_61342.1|-47.0|COG1819|S|Transferase	-
c62482/f1p608/1892	XP_020264943.1|0x1.08877e02dbcfcp-620|elongation factor 2-like [Asparagus officinalis]_x0001_XP_020264944.1 elongation factor 2-like [Asparagus officinalis]_x0001_ONK69796.1 uncharacterized protein A4U43_C05F26830 [Asparagus officinalis]	-	cellular_component:cytoplasm(GO:0005737);;cellular_component:cytoplasm(GO:0005737);;biological_process:translation(GO:0006412);;biological_process:translational elongation(GO:0006414);;molecular_function:nucleotide binding(GO:0000166);;molecular_function:translation elongation factor activity(GO:0003746);;molecular_function:GTP binding(GO:0005525)	O23755|EF2_BETVU|-185.1|Elongation factor 2 OS=Beta vulgaris PE=2 SV=1	4641.GSMUA_Achr10P21400_001|-186.5|COG0480|J|Catalyzes the GTP-dependent ribosomal translocation step during translation elongation. During this step, the ribosome changes from the pre-translocational (PRE) to the post- translocational (POST) state as the newly formed A-site-bound peptidyl-tRNA and P-site-bound deacylated tRNA move to the P and E sites, respectively. Catalyzes the coordinated mov…	-
c22845/f1p74/3707	XP_020597959.1|0x1.018d93541cd22p-853|cyclin-dependent kinase C-2-like [Phalaenopsis equestris]	-	molecular_function:ATP binding(GO:0005524);;molecular_function:RNA polymerase II carboxy-terminal domain kinase activity(GO:0008353);;molecular_function:kinase activity(GO:0016301);;biological_process:phosphorylation(GO:0016310);;molecular_function:transferase activity(GO:0016740);;molecular_function:nucleotide binding(GO:0000166);;molecular_function:protein serine/threonine kinase activity(GO:00…	Q5JK68|CDKC2_ORYSJ|-247.4|Cyclin-dependent kinase C-2 OS=Oryza sativa subsp. japonica GN=CDKC-2 PE=2 SV=1	4641.GSMUA_Achr5P05370_001|-254.4|ENOG410XPIR|T|Cyclin-Dependent Kinase	PF00069.24|Pkinase|7.3e-74|Protein kinase domain
c33802/f1p5/899	XP_020240932.1|0x1.1629e70abd10cp-286|SWR1 complex subunit 6 [Asparagus officinalis]_x0001_XP_020240933.1 SWR1 complex subunit 6 [Asparagus officinalis]_x0001_ONK61815.1 uncharacterized protein A4U43_C08F33880 [Asparagus officinalis]	-	biological_process:flower development(GO:0009908);;cellular_component:nuclear speck(GO:0016607);;biological_process:cell differentiation(GO:0030154);;molecular_function:metal ion binding(GO:0046872);;cellular_component:nucleus(GO:0005634);;cellular_component:nucleus(GO:0005634);;biological_process:multicellular organism development(GO:0007275)	Q9FHW2|SWC6_ARATH|-63.3|SWR1 complex subunit 6 OS=Arabidopsis thaliana GN=SWC6 PE=1 SV=1	4641.GSMUA_AchrUn_randomP13530_001|-76.6|ENOG4111HZU|S|zinc finger, HIT-type containing 1	-
c298509/f1p1/800	ONK60919.1|0x1.9f4997730e66p-228|uncharacterized protein A4U43_C08F24080 [Asparagus officinalis]	-	cellular_component:membrane(GO:0016020);;cellular_component:membrane(GO:0016020);;cellular_component:integral component of membrane(GO:0016021)	Q9S7V4|HA22A_ARATH|-60.9|HVA22-like protein a OS=Arabidopsis thaliana GN=HVA22A PE=2 SV=1	4641.GSMUA_Achr7P17980_001|-67.6|COG5052|U|receptor accessory protein	-
c27047/f1p62/2324	XP_010932352.1|0x1.60094dd6ec3f2p-411|PREDICTED: 40S ribosomal protein SA [Elaeis guineensis]	egu:105053046|-124.4|K02998|RP-SAe, RPSA; small subunit ribosomal protein SAe|ko03010|Ribosome;;	cellular_component:intracellular ribonucleoprotein complex(GO:0030529);;cellular_component:cytoplasm(GO:0005737);;cellular_component:cytoplasm(GO:0005737);;cellular_component:ribosome(GO:0005840)	A5BUU4|RSSA_VITVI|-120.5|40S ribosomal protein SA OS=Vitis vinifera GN=GSVIVT00034021001 PE=3 SV=1	39946.BGIOSGA012825-PA|-122.8|COG0052|J|30S ribosomal protein S2	-
c342566/f1p5/662	XP_004245191.1|0x1.2df265fa471aap-164|PREDICTED: cytochrome b-c1 complex subunit 7 [Solanum lycopersicum]	sly:101262441|-50.2|K00417|QCR7, UQCRB; ubiquinol-cytochrome c reductase subunit 7|ko00190|Oxidative phosphorylation;;	cellular_component:membrane(GO:0016020);;biological_process:oxidation-reduction process(GO:0055114);;cellular_component:respiratory chain(GO:0070469);;cellular_component:mitochondrion(GO:0005739);;cellular_component:mitochondrial inner membrane(GO:0005743);;cellular_component:mitochondrial inner membrane(GO:0005743)	P48502|QCR7_SOLTU|-52.1|Cytochrome b-c1 complex subunit 7 OS=Solanum tuberosum PE=1 SV=1	4081.Solyc08g067020.2.1|-51.5|ENOG4111V1G|C|component of the ubiquinol-cytochrome c reductase complex (complex III or cytochrome b-c1 complex), which is part of the mitochondrial respiratory chain (By similarity)	-
c149928/f1p2/1604	XP_003293472.1|0x1.00aa1148ff327p-62|hypothetical protein DICPUDRAFT_158333 [Dictyostelium purpureum]_x0001_EGC30006.1 hypothetical protein DICPUDRAFT_158333 [Dictyostelium purpureum]	-	-	-	-	-
c232289/f1p36/1754	XP_010934670.1|0x1.3444e26cd0c78p-587|PREDICTED: tubulin alpha-3 chain [Elaeis guineensis]	pda:103717644|-177.5|K07374|TUBA; tubulin alpha|ko04145|Phagosome;;	cellular_component:cytoskeleton(GO:0005856);;cellular_component:cytoskeleton(GO:0005856);;cellular_component:microtubule(GO:0005874);;molecular_function:nucleotide binding(GO:0000166);;molecular_function:GTP binding(GO:0005525);;cellular_component:cytoplasm(GO:0005737)	O22349|TBA3_ELEIN|-178.5|Tubulin alpha-3 chain OS=Eleusine indica GN=TUBA3 PE=2 SV=1	39946.BGIOSGA025994-PA|-177.0|COG5023|Z|protein polymerization	PF03953.16|Tubulin_C|8.3e-51|Tubulin C-terminal domain
c32063/f1p6/2291	XP_020277356.1|0x1.d27ceaca6e08cp-427|uncharacterized protein LOC109851567 [Asparagus officinalis]_x0001_ONK59489.1 uncharacterized protein A4U43_C08F6960 [Asparagus officinalis]	-	-	-	4641.GSMUA_Achr1P14570_001|-116.8|ENOG410YE8S|S|expressed protein	-
c31221/f1p555/2688	OAY82909.1|0x1.e238aa599f802p-214|Eukaryotic initiation factor 4A-1 [Ananas comosus]	bdi:100844546|-63.9|K03257|EIF4A; translation initiation factor 4A|ko03013|RNA transport;;	molecular_function:helicase activity(GO:0004386);;molecular_function:ATP binding(GO:0005524);;biological_process:translation(GO:0006412);;biological_process:translational initiation(GO:0006413);;molecular_function:hydrolase activity(GO:0016787);;molecular_function:nucleotide binding(GO:0000166);;molecular_function:RNA binding(GO:0003723);;molecular_function:translation initiation factor activity(…	P41378|IF4A_WHEAT|-66.2|Eukaryotic initiation factor 4A OS=Triticum aestivum PE=2 SV=1	4513.MLOC_69436.3|-65.1|COG0513|L|purine NTP-dependent helicase activity	-
c107995/f1p24/1128	XP_020676358.1|0x1.6bec55f3db9acp-197|glutathione S-transferase T1-like [Dendrobium catenatum]_x0001_PKU66376.1 Glutathione S-transferase T1 [Dendrobium catenatum]	mus:103973270|-58.0|K00799|GST, gst; glutathione S-transferase [EC:2.5.1.18]|ko00480|Glutathione metabolism;;	cellular_component:nucleus(GO:0005634);;cellular_component:peroxisome(GO:0005777);;cellular_component:peroxisome(GO:0005777);;biological_process:response to toxic substance(GO:0009636);;molecular_function:oxidoreductase activity(GO:0016491);;molecular_function:transferase activity(GO:0016740);;biological_process:oxidation-reduction process(GO:0055114);;molecular_function:glutathione transferase a…	Q9ZRT5|GSTT1_ARATH|-52.8|Glutathione S-transferase T1 OS=Arabidopsis thaliana GN=GSTT1 PE=2 SV=1	4641.GSMUA_AchrUn_randomP06220_001|-59.1|COG0625|O|glutathione Stransferase	-
c87583/f1p287/1228	AKR15681.1|0x1.ecce7a7710871p-152|coat protein [Garlic virus X]	-	-	-	-	-
c75064/f1p41/878	OMP06063.1|0x1.24f2ee9df0e1dp-405|Heat shock protein Hsp90 [Corchorus olitorius]	pda:103715800|-122.1|K04079|HSP90A, htpG; molecular chaperone HtpG|ko04141|Protein processing in endoplasmic reticulum;;ko04626|Plant-pathogen interaction;;	cellular_component:cytoplasm(GO:0005737);;molecular_function:nucleotide binding(GO:0000166);;molecular_function:ATP binding(GO:0005524);;cellular_component:cytoplasm(GO:0005737)	P36182|HSP82_TOBAC|-122.8|Heat shock protein 82 (Fragment) OS=Nicotiana tabacum GN=HSP82 PE=2 SV=1	3694.POPTR_0004s07190.1|-121.9|COG0326|O|Molecular chaperone. Has ATPase activity (By similarity)	PF00183.17|HSP90|6.9e-124|Hsp90 protein
c61041/f1p187/1872	CTQ87153.1|0x1.be92a9e7f0874p-242|coat protein [Garlic virus X]_x0001_CTQ87154.1 coat protein [Garlic virus X]	-	-	-	-	PF00286.19|Flexi_CP|1.4e-33|Viral coat protein
c34818/f1p804/3113	XP_020263929.1|0x1.8da161a22e5f3p-849|beta-glucosidase 1-like [Asparagus officinalis]_x0001_ONK81454.1 uncharacterized protein A4U43_C01F29260 [Asparagus officinalis]	egu:105033762|-243.1|K05350|bglB; beta-glucosidase [EC:3.2.1.21]|ko00940|Phenylpropanoid biosynthesis;;ko00460|Cyanoamino acid metabolism;;ko00500|Starch and sucrose metabolism;;	biological_process:metabolic process(GO:0008152);;molecular_function:beta-glucosidase activity(GO:0008422);;molecular_function:beta-glucosidase activity(GO:0008422);;molecular_function:hydrolase activity(GO:0016787);;molecular_function:hydrolase activity, acting on glycosyl bonds(GO:0016798);;molecular_function:metal ion binding(GO:0046872);;molecular_function:scopolin beta-glucosidase activity(G…	Q9LV33|BGL44_ARATH|-221.4|Beta-glucosidase 44 OS=Arabidopsis thaliana GN=BGLU44 PE=2 SV=1	4641.GSMUA_Achr3P29530_001|-235.7|COG2723|G|beta-glucosidase	PF00232.17|Glyco_hydro_1|2.7e-158|Glycosyl hydrolase family 1
c224666/f1p59/1656	XP_009390472.1|0x1.7dca680c6f2ddp-142|PREDICTED: aspartate--tRNA ligase 2, cytoplasmic [Musa acuminata subsp. malaccensis]	pda:103720894|-43.5|K01876|DARS, aspS; aspartyl-tRNA synthetase [EC:6.1.1.12]|ko00970|Aminoacyl-tRNA biosynthesis;;	molecular_function:aspartate-tRNA ligase activity(GO:0004815);;molecular_function:ATP binding(GO:0005524);;cellular_component:cytoplasm(GO:0005737);;cellular_component:cytosol(GO:0005829);;biological_process:translation(GO:0006412);;molecular_function:ligase activity(GO:0016874);;molecular_function:metal ion binding(GO:0046872);;molecular_function:nucleotide binding(GO:0000166);;molecular_functio…	Q8H104|SYDC1_ARATH|-39.5|Aspartate--tRNA ligase 1, cytoplasmic OS=Arabidopsis thaliana GN=At4g26870 PE=2 SV=1	4641.GSMUA_Achr3P05380_001|-44.8|COG0017|J|asparaginyl-tRNA synthetase	-
c147471/f1p142/1937	XP_016437200.1|0x1.bd57e7b71d583p-554|PREDICTED: casein kinase I-like isoform X1 [Nicotiana tabacum]_x0001_XP_016437201.1 PREDICTED: casein kinase I-like isoform X1 [Nicotiana tabacum]_x0001_XP_016437202.1 PREDICTED: casein kinase I-like isoform X1 [Nicotiana tabacum]_x0001_XP_016437203.1 PREDICTED: casein kinase I-like isoform X1 [Nicotiana tabacum]	-	biological_process:regulation of long-day photoperiodism, flowering(GO:0048586);;molecular_function:ATP binding(GO:0005524);;cellular_component:nucleus(GO:0005634);;cellular_component:nucleus(GO:0005634);;cellular_component:nucleus(GO:0005634);;cellular_component:cytoplasm(GO:0005737);;cellular_component:cytoplasm(GO:0005737);;biological_process:gibberellic acid mediated signaling pathway(GO:0009…	Q852L0|HD16N_ORYSJ|-164.9|Casein kinase 1-like protein HD16 OS=Oryza sativa subsp. japonica GN=HD16 PE=1 SV=1	4513.MLOC_3952.4|-158.4|ENOG410XPGP|T|Casein Kinase	-
c36545/f1p42/3216	XP_010922178.1|0x1.5fcd6e806937cp-1009|PREDICTED: pre-mRNA-splicing factor CWC22 homolog [Elaeis guineensis]_x0001_XP_010922179.1 PREDICTED: pre-mRNA-splicing factor CWC22 homolog [Elaeis guineensis]_x0001_XP_010922180.1 PREDICTED: pre-mRNA-splicing factor CWC22 homolog [Elaeis guineensis]	-	-	-	4641.GSMUA_AchrUn_randomP01640_001|-284.3|ENOG410XNP2|S|pre-mRNA-splicing factor cwc-22	PF02847.16|MA3|3.2e-30|MA3 domain
c22062/f1p2/1550	XP_020266884.1|0x1.fbe1099d45931p-222|uncharacterized protein LOC109842415 [Asparagus officinalis]	-	-	-	4113.PGSC0003DMT400023598|-28.4|ENOG410YNUB|S|NA	-
c111605/f1p20/1344	XP_020241775.1|0x1.7bb46573b4f79p-405|ribose-phosphate pyrophosphokinase 1-like [Asparagus officinalis]	pda:103697673|-114.8|K00948|PRPS, prsA; ribose-phosphate pyrophosphokinase [EC:2.7.6.1]|ko00230|Purine metabolism;;ko01230|Biosynthesis of amino acids;;ko00030|Pentose phosphate pathway;;ko01200|Carbon metabolism;;	biological_process:nucleotide biosynthetic process(GO:0009165);;molecular_function:kinase activity(GO:0016301);;biological_process:phosphorylation(GO:0016310);;molecular_function:transferase activity(GO:0016740);;molecular_function:metal ion binding(GO:0046872);;molecular_function:nucleotide binding(GO:0000166);;molecular_function:ribose phosphate diphosphokinase activity(GO:0004749);;molecular_f…	Q9XG98|KPRS1_SPIOL|-107.6|Ribose-phosphate pyrophosphokinase 1 OS=Spinacia oleracea GN=PRS1 PE=2 SV=1	29760.VIT_15s0021g00460.t01|-110.4|COG0462|F|Phosphoribosyl pyrophosphate synthase	PF13793.5|Pribosyltran_N|6.8e-51|N-terminal domain of ribose phosphate pyrophosphokinase
c102775/f1p1/921	XP_020260699.1|0x1.bdaa1b639fbe7p-254|probable tocopherol O-methyltransferase, chloroplastic [Asparagus officinalis]	bdi:100836877|-76.3|K05928|E2.1.1.95; tocopherol O-methyltransferase [EC:2.1.1.95]|ko00130|Ubiquinone and other terpenoid-quinone biosynthesis;;	cellular_component:plastid(GO:0009536);;biological_process:vitamin E biosynthetic process(GO:0010189);;molecular_function:transferase activity(GO:0016740);;biological_process:methylation(GO:0032259);;molecular_function:tocopherol O-methyltransferase activity(GO:0050342);;molecular_function:methyltransferase activity(GO:0008168);;cellular_component:chloroplast(GO:0009507);;cellular_component:chlor…	Q6ZIK0|GTOMC_ORYSJ|-74.2|Probable tocopherol O-methyltransferase, chloroplastic OS=Oryza sativa subsp. japonica GN=VTE4 PE=2 SV=1	15368.BRADI3G52560.1|-77.6|ENOG410XP5G|S|Methyltransferase	-
c6477/f1p116/3423	XP_020259152.1|0x1.75fce6b38f739p-157|topless-related protein 1-like [Asparagus officinalis]	-	biological_process:transcription, DNA-templated(GO:0006351);;biological_process:regulation of transcription, DNA-templated(GO:0006355);;biological_process:multicellular organism development(GO:0007275);;molecular_function:protein binding(GO:0005515);;cellular_component:nucleus(GO:0005634);;cellular_component:nucleus(GO:0005634)	Q94AI7|TPL_ARATH|-42.8|Protein TOPLESS OS=Arabidopsis thaliana GN=TPL PE=1 SV=1	4641.GSMUA_Achr4P09920_001|-44.8|ENOG41101DA|S|CTLH	-
c2811/f1p541/2549	XP_008787861.1|0x1.0b88c483abb28p-187|PREDICTED: nuclear transcription factor Y subunit A-6-like [Phoenix dactylifera]	-	biological_process:transcription, DNA-templated(GO:0006351);;biological_process:regulation of transcription, DNA-templated(GO:0006355);;molecular_function:DNA binding(GO:0003677);;cellular_component:nucleus(GO:0005634);;cellular_component:nucleus(GO:0005634)	Q9LVJ7|NFYA6_ARATH|-29.0|Nuclear transcription factor Y subunit A-6 OS=Arabidopsis thaliana GN=NFYA6 PE=1 SV=1	4641.GSMUA_Achr2P21730_001|-50.1|COG5224|K|Nuclear transcription factor Y	-
c59891/f1p27/1276	ONK64332.1|0x1.0e2f3aaa60624p-175|uncharacterized protein A4U43_C07F24580 [Asparagus officinalis]	-	cellular_component:membrane(GO:0016020);;cellular_component:integral component of membrane(GO:0016021);;molecular_function:hydrolase activity(GO:0016787);;molecular_function:metal ion binding(GO:0046872);;molecular_function:phosphoprotein phosphatase activity(GO:0004721);;molecular_function:phosphoprotein phosphatase activity(GO:0004721);;cellular_component:membrane(GO:0016020)	Q5Z8P0|P2C60_ORYSJ|-52.2|Probable protein phosphatase 2C 60 OS=Oryza sativa subsp. japonica GN=Os06g0717800 PE=2 SV=1	4641.GSMUA_Achr3P00610_001|-52.0|COG0631|T|Phosphatase	-
c41970/f1p16/1850	AAK95661.1|0x1.832de6d9d0798p-80|alliinase, partial [Allium sativum]	-	molecular_function:alliin lyase activity(GO:0047654);;cellular_component:vacuole(GO:0005773);;cellular_component:vacuole(GO:0005773);;molecular_function:lyase activity(GO:0016829)	Q01594|ALLN1_ALLSA|-26.7|Alliin lyase 1 OS=Allium sativum PE=1 SV=1	-	-
c40867/f1p171/3094	XP_020272964.1|0x1.23ff9ec6e886ap-419|ATP-dependent zinc metalloprotease FTSH 7, chloroplastic-like [Asparagus officinalis]_x0001_ONK62096.1 uncharacterized protein A4U43_C07F320 [Asparagus officinalis]	-	molecular_function:peptidase activity(GO:0008233);;molecular_function:metallopeptidase activity(GO:0008237);;cellular_component:chloroplast(GO:0009507);;cellular_component:chloroplast thylakoid membrane(GO:0009535);;cellular_component:plastid(GO:0009536);;cellular_component:thylakoid(GO:0009579);;cellular_component:membrane(GO:0016020);;cellular_component:integral component of membrane(GO:0016021…	Q6H6R9|FTSH7_ORYSJ|-118.6|ATP-dependent zinc metalloprotease FTSH 7, chloroplastic OS=Oryza sativa subsp. japonica GN=FTSH7 PE=3 SV=1	3847.GLYMA14G37090.1|-121.7|COG0465|O|Acts as a processive, ATP-dependent zinc metallopeptidase for both cytoplasmic and membrane proteins. Plays a role in the quality control of integral membrane proteins (By similarity)	PF01434.17|Peptidase_M41|8.3e-44|Peptidase family M41
c29061/f1p133/2076	XP_020252665.1|0x1.7d3a4a590b1cbp-582|mitogen-activated protein kinase kinase 1 isoform X1 [Asparagus officinalis]_x0001_ONK77035.1 uncharacterized protein A4U43_C02F2430 [Asparagus officinalis]	-	molecular_function:ATP binding(GO:0005524);;molecular_function:kinase activity(GO:0016301);;biological_process:phosphorylation(GO:0016310);;molecular_function:transferase activity(GO:0016740);;molecular_function:nucleotide binding(GO:0000166);;molecular_function:protein serine/threonine kinase activity(GO:0004674);;molecular_function:protein binding(GO:0005515)	Q5QN75|M2K1_ORYSJ|-158.7|Mitogen-activated protein kinase kinase 1 OS=Oryza sativa subsp. japonica GN=MKK1 PE=1 SV=1	4113.PGSC0003DMT400014637|-162.5|ENOG410XQ5A|T|mitogen-activated protein kinase kinase	PF00069.24|Pkinase|2.8e-64|Protein kinase domain
c22092/f1p16/2219	BAJ86445.1|0x1.78464f7374d76p-547|predicted protein [Hordeum vulgare subsp. vulgare]	thj:104808276|-50.9|K04715|E2.7.1.138, CERK; ceramide kinase [EC:2.7.1.138]|ko00600|Sphingolipid metabolism;;	molecular_function:ATP binding(GO:0005524);;biological_process:ceramide metabolic process(GO:0006672);;molecular_function:kinase activity(GO:0016301);;biological_process:phosphorylation(GO:0016310);;molecular_function:transferase activity(GO:0016740);;biological_process:negative regulation of programmed cell death(GO:0043069);;molecular_function:metal ion binding(GO:0046872);;molecular_function:d…	C0LT23|CERK_ORYSJ|-54.5|Ceramide kinase OS=Oryza sativa subsp. japonica GN=CERK PE=1 SV=1	4513.MLOC_58592.8|-168.3|COG1597|I|diacylglycerol kinase	-
c86929/f1p40/1844	XP_020254626.1|0x1.46b9b764d1c34p-680|nucleolar protein 56-like [Asparagus officinalis]_x0001_ONK78471.1 uncharacterized protein A4U43_C02F19120 [Asparagus officinalis]	egu:105045325|-197.9|K14564|NOP56; nucleolar protein 56|ko03008|Ribosome biogenesis in eukaryotes;;	cellular_component:nucleus(GO:0005634);;cellular_component:nucleolus(GO:0005730);;biological_process:ribosome biogenesis(GO:0042254)	Q9MAB3|NOP5B_ARATH|-84.3|Probable nucleolar protein 5-2 OS=Arabidopsis thaliana GN=NOP5-2 PE=1 SV=1	4641.GSMUA_AchrUn_randomP13350_001|-198.1|COG1498|J|Nucleolar protein	PF01798.17|Nop|8.5e-86|snoRNA binding domain, fibrillarin
c118606/f1p2/1736	XP_020271577.1|0x1.09657852dabb7p-611|ADP,ATP carrier protein 1, mitochondrial-like [Asparagus officinalis]_x0001_ONK79061.1 uncharacterized protein A4U43_C01F2500 [Asparagus officinalis]	-	cellular_component:membrane(GO:0016020);;cellular_component:integral component of membrane(GO:0016021);;cellular_component:mitochondrion(GO:0005739);;cellular_component:mitochondrial inner membrane(GO:0005743);;cellular_component:mitochondrial inner membrane(GO:0005743)	O22342|ADT1_GOSHI|-169.7|ADP,ATP carrier protein 1, mitochondrial OS=Gossypium hirsutum GN=ANT1 PE=2 SV=1	3694.POPTR_0001s27480.1|-170.7|ENOG410XNW0|U|transmembrane transport	-
c722/f1p940/4106	KGO67947.1|0x1.473f59779e2c7p-126|hypothetical protein PITC_029160 [Penicillium italicum]	-	-	-	4533.OB04G17350.1|-26.5|-|-|-	-
c33318/f1p90/3103	ERN00259.1|0x1.d7fd4a6532d41p-267|hypothetical protein AMTR_s00111p00143660 [Amborella trichopoda]	cic:CICLE_v10030570mg|-76.7|K14005|SEC31; protein transport protein SEC31|ko04141|Protein processing in endoplasmic reticulum;;	cellular_component:Golgi apparatus(GO:0005794);;biological_process:protein transport(GO:0015031);;biological_process:vesicle-mediated transport(GO:0016192);;cellular_component:endoplasmic reticulum(GO:0005783);;cellular_component:endoplasmic reticulum(GO:0005783);;cellular_component:Golgi apparatus(GO:0005794)	Q8L611|SC31B_ARATH|-53.0|Protein transport protein SEC31 homolog B OS=Arabidopsis thaliana GN=SEC31B PE=1 SV=1	3694.POPTR_0009s06020.1|-74.4|ENOG410XQ1D|U|Component of the coat protein complex II (COPII) which promotes the formation of transport vesicles from the endoplasmic reticulum (ER). The coat has two main functions, the physical deformation of the endoplasmic reticulum membrane into vesicles and the selection of cargo molecules	-
c29526/f1p72/2285	XP_009412253.1|0x1.d42cf7b73cab2p-630|PREDICTED: cellulose synthase-like protein G3 isoform X2 [Musa acuminata subsp. malaccensis]	-	cellular_component:integral component of membrane(GO:0016021);;molecular_function:transferase activity(GO:0016740);;molecular_function:transferase activity, transferring glycosyl groups(GO:0016757);;biological_process:cell wall organization(GO:0071555);;cellular_component:Golgi membrane(GO:0000139);;cellular_component:Golgi apparatus(GO:0005794);;cellular_component:membrane(GO:0016020)	Q8VYR4|CSLG2_ARATH|-73.2|Cellulose synthase-like protein G2 OS=Arabidopsis thaliana GN=CSLG2 PE=2 SV=1	4641.GSMUA_Achr8P05340_001|-190.4|COG1215|M|Glycosyl transferase, family 2	PF03552.13|Cellulose_synt|5.2e-73|Cellulose synthase
c271616/f1p42/1443	XP_009410302.1|0x1.81e3661c6fb33p-259|PREDICTED: probable 28S rRNA (cytosine(4447)-C(5))-methyltransferase [Musa acuminata subsp. malaccensis]	-	-	-	3711.Bra026418.1-P|-74.7|COG0144|J|nOP2 Sun	-
c37723/f1p3/2075	XP_009398886.2|0x1.6b64b8d74d716p-119|PREDICTED: probable LRR receptor-like serine/threonine-protein kinase At4g20940 [Musa acuminata subsp. malaccensis]	-	-	-	4641.GSMUA_Achr7P13850_001|-38.5|COG0515|T|Serine Threonine protein kinase	-
c65950/f1p3/2062	XP_020253700.1|0x1.0c23595a91789p-253|LOW QUALITY PROTEIN: protein MOR1-like [Asparagus officinalis]	-	cellular_component:microtubule(GO:0005874);;cellular_component:cytoplasm(GO:0005737);;cellular_component:cytoskeleton(GO:0005856);;cellular_component:cytoskeleton(GO:0005856)	Q5N749|MOR1_ORYSJ|-46.4|Protein MOR1 OS=Oryza sativa subsp. japonica GN=MOR1 PE=2 SV=1	4513.MLOC_37273.8|-57.8|ENOG410XPTW|S|microtubule binding	-
c130544/f1p4/952	XP_020268386.1|0x1.39ca74585cedp-124|LOW QUALITY PROTEIN: ABC transporter G family member 22 [Asparagus officinalis]	-	cellular_component:membrane(GO:0016020);;cellular_component:integral component of membrane(GO:0016021);;molecular_function:nucleotide binding(GO:0000166);;molecular_function:ATP binding(GO:0005524);;cellular_component:membrane(GO:0016020)	Q93YS4|AB22G_ARATH|-27.9|ABC transporter G family member 22 OS=Arabidopsis thaliana GN=ABCG22 PE=1 SV=1	4641.GSMUA_Achr8P04700_001|-36.8|COG1131|V|(ABC) transporter	-
c17536/f1p25/3146	ONK65853.1|0x1.7450e53e51a53p-266|uncharacterized protein A4U43_C06F1640 [Asparagus officinalis]	-	cellular_component:nucleus(GO:0005634);;cellular_component:nucleus(GO:0005634);;cellular_component:nucleus(GO:0005634);;biological_process:nucleosome assembly(GO:0006334);;biological_process:transcription, DNA-templated(GO:0006351);;biological_process:regulation of transcription, DNA-templated(GO:0006355);;biological_process:multicellular organism development(GO:0007275);;biological_process:respo…	F4IF36|FGT1_ARATH|-65.5|Protein FORGETTER 1 OS=Arabidopsis thaliana GN=FGT1 PE=1 SV=1	4641.GSMUA_Achr8P17720_001|-78.3|ENOG410XQ7Q|S|Strawberry notch homolog	PF13871.5|Helicase_C_4|7.9e-34|C-terminal domain on Strawberry notch homologue
c19241/f1p585/2019	AAA32643.1|0x1.0de0e37d7b9adp-264|II lectin, partial [Allium sativum]	-	biological_process:defense response(GO:0006952);;molecular_function:carbohydrate binding(GO:0030246);;molecular_function:mannose binding(GO:0005537);;cellular_component:extracellular region(GO:0005576);;cellular_component:extracellular region(GO:0005576)	P83886|ASAL_ALLSA|-56.3|Mannose-specific lectin OS=Allium sativum GN=LECASAL PE=1 SV=3	-	-
c144177/f1p104/1903	XP_006432415.1|0x1.190b69b267569p-328|hypothetical protein CICLE_v10001735mg [Citrus clementina]_x0001_ESR45655.1 hypothetical protein CICLE_v10001735mg [Citrus clementina]	-	-	-	4113.PGSC0003DMT400008491|-89.2|COG5018|S|ERI1 exoribonuclease family member	PF00929.23|RNase_T|2.2e-29|Exonuclease
c21387/f2p161/3638	ONK55575.1|0x1.57b2931b11b2ap-704|uncharacterized protein A4U43_UnF1400 [Asparagus officinalis]	egu:105060637|-210.8|K04077|groEL, HSPD1; chaperonin GroEL|ko03018|RNA degradation;;	cellular_component:plastid(GO:0009536);;cellular_component:chloroplast stroma(GO:0009570);;molecular_function:nucleotide binding(GO:0000166);;molecular_function:ATP binding(GO:0005524);;cellular_component:chloroplast(GO:0009507)	P21240|CPNB1_ARATH|-207.4|Chaperonin 60 subunit beta 1, chloroplastic OS=Arabidopsis thaliana GN=CPN60B1 PE=1 SV=3	4641.GSMUA_Achr3P27620_001|-211.7|COG0459|O|Prevents misfolding and promotes the refolding and proper assembly of unfolded polypeptides generated under stress conditions (By similarity)	PF00118.23|Cpn60_TCP1|4.8e-64|TCP-1/cpn60 chaperonin family
c25424/f1p285/2232	XP_020264643.1|0x1.e5c0e11f627f9p-432|xyloglucan endotransglucosylase/hydrolase protein 15-like [Asparagus officinalis]	-	biological_process:metabolic process(GO:0008152);;molecular_function:transferase activity(GO:0016740);;molecular_function:xyloglucan:xyloglucosyl transferase activity(GO:0016762);;molecular_function:hydrolase activity(GO:0016787);;molecular_function:hydrolase activity, acting on glycosyl bonds(GO:0016798);;cellular_component:apoplast(GO:0048046);;cellular_component:apoplast(GO:0048046);;biologica…	Q38857|XTH22_ARATH|-112.8|Xyloglucan endotransglucosylase/hydrolase protein 22 OS=Arabidopsis thaliana GN=XTH22 PE=1 SV=1	29760.VIT_11s0052g01200.t01|-118.2|COG2273|G|hydrolase family 16	PF00722.20|Glyco_hydro_16|1.1e-62|Glycosyl hydrolases family 16
c23765/f1p123/2045	AKI87757.1|0x1.7e7d6781c731cp-184|alliinase, partial [Allium sativum]	-	molecular_function:alliin lyase activity(GO:0047654);;cellular_component:vacuole(GO:0005773);;cellular_component:vacuole(GO:0005773);;molecular_function:lyase activity(GO:0016829)	Q01594|ALLN1_ALLSA|-57.5|Alliin lyase 1 OS=Allium sativum PE=1 SV=1	-	-
c11430/f1p38/2304	OHT03579.1|0x1.7b16ec3229a82p-199|hypothetical protein TRFO_29010 [Tritrichomonas foetus]	-	-	-	4533.OB04G17350.1|-37.4|-|-|-	-
c222654/f1p6/1567	ONK68678.1|0x1.1f6ebe8ae4f27p-562|uncharacterized protein A4U43_C05F14750 [Asparagus officinalis]	-	biological_process:response to auxin(GO:0009733);;biological_process:auxin-activated signaling pathway(GO:0009734);;cellular_component:membrane(GO:0016020);;cellular_component:integral component of membrane(GO:0016021);;cellular_component:endoplasmic reticulum(GO:0005783);;cellular_component:endoplasmic reticulum membrane(GO:0005789);;cellular_component:endoplasmic reticulum membrane(GO:0005789)	Q9FKY4|PILS7_ARATH|-50.2|Protein PIN-LIKES 7 OS=Arabidopsis thaliana GN=PILS7 PE=2 SV=1	3847.GLYMA10G33280.2|-55.9|COG0679|S|Auxin Efflux Carrier	PF03547.17|Mem_trans|2.5e-70|Membrane transport protein
c61075/f1p93/2189	XP_020246723.1|0x1.07a6ade63b596p-536|ribonuclease TUDOR 2-like [Asparagus officinalis]	-	biological_process:response to salt stress(GO:0009651);;molecular_function:nuclease activity(GO:0004518);;biological_process:response to salt stress(GO:0009651);;cellular_component:nuclear envelope(GO:0005635);;biological_process:response to salt stress(GO:0009651);;cellular_component:cytoplasm(GO:0005737);;cellular_component:cytoplasm(GO:0005737);;cellular_component:cytoplasm(GO:0005737);;cellul…	Q8VZG7|TSN1_ARATH|-142.4|Ribonuclease TUDOR 1 OS=Arabidopsis thaliana GN=TSN1 PE=1 SV=1	4641.GSMUA_Achr6P08280_001|-156.0|COG1525|L|nuclease	-
c58349/f1p21/1587	XP_020241849.1|0x1.16419f05a629bp-403|3-hydroxyisobutyryl-CoA hydrolase-like protein 3, mitochondrial [Asparagus officinalis]	jcu:105639273|-115.0|K05605|HIBCH; 3-hydroxyisobutyryl-CoA hydrolase [EC:3.1.2.4]|ko01200|Carbon metabolism;;ko00640|Propanoate metabolism;;ko00410|beta-Alanine metabolism;;ko00280|Valine, leucine and isoleucine degradation;;	cellular_component:mitochondrion(GO:0005739);;cellular_component:mitochondrion(GO:0005739);;molecular_function:hydrolase activity(GO:0016787)	Q9T0K7|HIBC6_ARATH|-108.1|3-hydroxyisobutyryl-CoA hydrolase-like protein 3, mitochondrial OS=Arabidopsis thaliana GN=At4g13360 PE=1 SV=2	3847.GLYMA08G04460.1|-113.1|COG1024|I|Enoyl-CoA hydratase	PF16113.4|ECH_2|6.1e-79|Enoyl-CoA hydratase/isomerase
c3614/f1p8/2292	XP_020248176.1|0x1.5ac191169253p-71|nuclear pore complex protein GP210 [Asparagus officinalis]_x0001_ONK57184.1 uncharacterized protein A4U43_C10F17460 [Asparagus officinalis]	mus:103981790|-19.6|K14314|NUP210, GP210; nuclear pore complex protein Nup210|ko03013|RNA transport;;	-	-	-	-
c68702/f1p7/1593	XP_020265052.1|0x1.3ef65bd89d11fp-223|calcium permeable stress-gated cation channel 1-like [Asparagus officinalis]_x0001_ONK69887.1 uncharacterized protein A4U43_C05F27890 [Asparagus officinalis]	-	cellular_component:membrane(GO:0016020);;cellular_component:membrane(GO:0016020);;cellular_component:integral component of membrane(GO:0016021);;molecular_function:calcium activated cation channel activity(GO:0005227);;biological_process:ion transport(GO:0006811);;biological_process:cation transport(GO:0006812)	Q5XEZ5|CSC1_ARATH|-53.4|Calcium permeable stress-gated cation channel 1 OS=Arabidopsis thaliana GN=CSC1 PE=2 SV=1	4641.GSMUA_Achr9P21900_001|-63.0|COG5594|S|transmembrane protein 63C	-
c19772/f1p3/1138	CAN74177.1|0x1.54f7e7cc0333bp-153|hypothetical protein VITISV_029256 [Vitis vinifera]	-	-	-	29760.VIT_14s0006g01460.t01|-48.1|-|-|-	-
c43290/f2p3/1012	XP_020594441.1|0x1.e77804d63326bp-168|golgin subfamily A member 6-like protein 1 [Phalaenopsis equestris]	-	-	-	4641.GSMUA_Achr1P11210_001|-47.8|ENOG410YPNR|S|NA	-
c24577/f1p62/3694	XP_008800451.1|0x1.53f998f38d37ap-267|PREDICTED: uncharacterized protein LOC103714813 [Phoenix dactylifera]	-	-	-	4641.GSMUA_Achr5P05140_001|-78.6|ENOG410XSPK|S|NA	-
c140522/f1p6/1785	XP_020249504.1|0x1.105a8069d1195p-145|LOW QUALITY PROTEIN: callose synthase 3-like [Asparagus officinalis]	-	biological_process:regulation of cell shape(GO:0008360);;cellular_component:membrane(GO:0016020);;cellular_component:integral component of membrane(GO:0016021);;molecular_function:transferase activity(GO:0016740);;molecular_function:transferase activity, transferring glycosyl groups(GO:0016757);;biological_process:cell wall organization(GO:0071555);;molecular_function:1,3-beta-D-glucan synthase a…	Q9LXT9|CALS3_ARATH|-33.5|Callose synthase 3 OS=Arabidopsis thaliana GN=CALS3 PE=3 SV=3	4533.OB02G45380.1|-41.4|ENOG410XQ8V|S|synthase	-
c22290/f1p9/2325	ONK81973.1|0x0p+0|uncharacterized protein A4U43_C01F34810 [Asparagus officinalis]	mus:103997038|-10000.0|K16055|TPS; trehalose 6-phosphate synthase/phosphatase [EC:2.4.1.15 3.1.3.12]|ko00500|Starch and sucrose metabolism;;	cellular_component:cell wall(GO:0005618);;cellular_component:cytoplasm(GO:0005737);;cellular_component:cytoplasm(GO:0005737);;cellular_component:vacuole(GO:0005773);;cellular_component:vacuole(GO:0005773);;molecular_function:transferase activity(GO:0016740);;molecular_function:transferase activity, transferring glycosyl groups(GO:0016757);;molecular_function:alpha,alpha-trehalose-phosphate syntha…	Q9SYM4|TPS1_ARATH|-10000.0|Alpha,alpha-trehalose-phosphate synthase [UDP-forming] 1 OS=Arabidopsis thaliana GN=TPS1 PE=1 SV=1	4641.GSMUA_Achr9P05740_001|-10000.0|COG1877|G|trehalose biosynthetic process	PF00982.20|Glyco_transf_20|9.1e-149|Glycosyltransferase family 20
c36917/f1p6/1145	ONK74065.1|0x1.ebddaa743eee7p-420|uncharacterized protein A4U43_C03F2420 [Asparagus officinalis]	-	biological_process:protein transport(GO:0015031);;cellular_component:membrane(GO:0016020);;cellular_component:integral component of membrane(GO:0016021);;cellular_component:mitochondrion(GO:0005739);;cellular_component:mitochondrial outer membrane(GO:0005741);;cellular_component:mitochondrial outer membrane(GO:0005741)	F4KCL7|OE64M_ARATH|-81.7|Outer envelope protein 64, mitochondrial OS=Arabidopsis thaliana GN=OM64 PE=1 SV=1	4641.GSMUA_Achr9P14860_001|-115.5|COG0154|J|Allows the formation of correctly charged Gln-tRNA(Gln) through the transamidation of misacylated Glu-tRNA(Gln) in organisms which lack glutaminyl-tRNA synthetase. The reaction takes place in the presence of glutamine and ATP through an activated gamma-phospho-Glu-tRNA(Gln) (By similarity)	-
c1894/f1p89/5602	XP_020541430.1|0x1.643e7b1458271p-418|general negative regulator of transcription subunit 3 isoform X2 [Jatropha curcas]	thj:104801500|-113.9|K12580|CNOT3, NOT3; CCR4-NOT transcription complex subunit 3|ko03018|RNA degradation;;	-	-	3711.Bra006447.1-P|-111.6|COG5665|K|CCR4-NOT transcription complex, subunit 3	PF04065.14|Not3|3.9e-85|Not1 N-terminal domain, CCR4-Not complex component
c1349/f1p22/2456	XP_020266600.1|0x1.2c745ac02bcd4p-563|uncharacterized protein LOC109842100 [Asparagus officinalis]	-	-	-	3694.POPTR_0018s09260.1|-152.2|ENOG411201X|S|NA	-
c26039/f1p380/3845	AMN16535.1|0x1.38ab5584f2e8fp-903|sucrose synthase [Ornithogalum longebracteatum]	egu:105056682|-259.3|K00695|E2.4.1.13; sucrose synthase [EC:2.4.1.13]|ko00500|Starch and sucrose metabolism;;	molecular_function:sucrose synthase activity(GO:0016157);;molecular_function:transferase activity(GO:0016740);;molecular_function:transferase activity, transferring glycosyl groups(GO:0016757)	Q41608|SUS1_TULGE|-255.8|Sucrose synthase 1 OS=Tulipa gesneriana PE=2 SV=1	4641.GSMUA_Achr6P10890_001|-251.6|COG0438|M|Glycosyl transferase (Group 1	PF00862.18|Sucrose_synth|3.4e-143|Sucrose synthase
c104102/f1p32/896	BAF56180.1|0x1.21d12b530cdc1p-373|glutathione S-transferase [Allium cepa]	mus:103971959|-69.4|K00799|GST, gst; glutathione S-transferase [EC:2.5.1.18]|ko00480|Glutathione metabolism;;	molecular_function:glutathione transferase activity(GO:0004364);;biological_process:auxin-activated signaling pathway(GO:0009734);;molecular_function:transferase activity(GO:0016740)	P46423|GSTF_HYOMU|-61.0|Glutathione S-transferase OS=Hyoscyamus muticus PE=1 SV=1	4641.GSMUA_Achr11P20440_001|-67.4|COG0625|O|glutathione Stransferase	-
c26135/f1p7/1405	XP_021634559.1|0x1.ed783984ef963p-147|protein TRAUCO [Manihot esculenta]_x0001_OAY30106.1 hypothetical protein MANES_14G004000 [Manihot esculenta]	-	cellular_component:nucleus(GO:0005634);;cellular_component:nucleus(GO:0005634)	Q9C8J7|TRO_ARATH|-43.1|Protein TRAUCO OS=Arabidopsis thaliana GN=TRO PE=1 SV=1	4081.Solyc11g065370.1.1|-45.2|ENOG410Y5GC|S|ash2 (absent, small, or homeotic)-like (Drosophila)	-
c120164/f1p6/1775	BAD06448.1|0x1.812f6a6fc00a8p-472|alliinase-like [Allium cepa]	-	molecular_function:alliin lyase activity(GO:0047654);;cellular_component:vacuole(GO:0005773);;cellular_component:vacuole(GO:0005773);;molecular_function:lyase activity(GO:0016829)	P31757|ALLN_ALLCE|-126.3|Alliin lyase OS=Allium cepa PE=1 SV=2	29760.VIT_18s0157g00170.t01|-93.8|ENOG410XS9Z|S|tryptophan aminotransferase-related protein 4-like	PF04864.12|Alliinase_C|1.8e-130|Allinase
c535/f1p4/4238	XP_020274626.1|0x1.1921bd4ad20f1p-120|ultraviolet-B receptor UVR8 [Asparagus officinalis]_x0001_ONK65436.1 uncharacterized protein A4U43_C07F37100 [Asparagus officinalis]	-	-	-	4558.Sb05g020900.1|-31.8|COG5184|DZ|regulator of chromosome condensation	-
c28468/f1p2/1222	OVA05381.1|0x1.23a18651f674fp-440|BEACH domain [Macleaya cordata]	-	cellular_component:P-body(GO:0000932);;cellular_component:cytoplasm(GO:0005737);;cellular_component:cytoplasm(GO:0005737)	F4HZB2|BCHA1_ARATH|-124.4|Protein SPIRRIG OS=Arabidopsis thaliana GN=SPI PE=1 SV=1	59689.fgenesh1_pm.C_scaffold_1000187|-123.6|ENOG410XNQC|S|beige BEACH domain containing protein	-
c23639/f1p2/3302	XP_022871553.1|0x1.bca5f07156184p-111|uncharacterized protein LOC111390706 [Olea europaea var. sylvestris]	-	-	-	3694.POPTR_0001s44370.1|-35.0|ENOG410YDI6|S|hAT dimerisation domain-containing protein	-
c21415/f1p75/3003	XP_020277378.1|0x1.0f6771d4a8a3fp-384|uncharacterized protein LOC109851579 [Asparagus officinalis]_x0001_ONK60892.1 uncharacterized protein A4U43_C08F23790 [Asparagus officinalis]	-	-	-	4113.PGSC0003DMT400074645|-117.1|COG0436|E|aminotransferase	PF00155.20|Aminotran_1_2|1.6e-43|Aminotransferase class I and II
c135060/f3p15/1499	XP_020268793.1|0x1.612df8a2c8e83p-401|protein FAR1-RELATED SEQUENCE 6-like isoform X1 [Asparagus officinalis]	-	-	-	-	-
c18756/f1p9/1922	ALI87037.1|0x1.869bc79b2abecp-104|interactor of JAZ [Catharanthus roseus]	-	cellular_component:nucleus(GO:0005634);;cellular_component:nucleus(GO:0005634)	B4FXN6|NNJA7_MAIZE|-32.1|Ninja-family protein 7 OS=Zea mays PE=2 SV=1	4513.MLOC_31759.2|-33.0|ENOG411297C|S|ninja-family protein	-
c290/f1p2033/5141	AFV61770.1|0x1.fb4be98eec67dp-252|40 kDa protein [Garlic virus X]	-	-	-	-	PF05549.10|Allexi_40kDa|2.8e-43|Allexivirus 40kDa protein
c1396/f2p302/2483	ONK69048.1|0x1.fa5d1001731d9p-508|uncharacterized protein A4U43_C05F18740 [Asparagus officinalis]	vvi:100268005|-151.8|K14454|GOT1; aspartate aminotransferase, cytoplasmic [EC:2.6.1.1]|ko00710|Carbon fixation in photosynthetic organisms;;ko00400|Phenylalanine, tyrosine and tryptophan biosynthesis;;ko00950|Isoquinoline alkaloid biosynthesis;;ko00350|Tyrosine metabolism;;ko01200|Carbon metabolism;;ko00330|Arginine and proline metabolism;;ko01210|2-Oxocarboxylic acid metabolism;;ko01230|Biosynth…	cellular_component:cytoplasm(GO:0005737);;biological_process:2-oxoglutarate metabolic process(GO:0006103);;biological_process:aspartate metabolic process(GO:0006531);;biological_process:glutamate metabolic process(GO:0006536);;molecular_function:transaminase activity(GO:0008483);;molecular_function:transferase activity(GO:0016740);;molecular_function:L-phenylalanine:2-oxoglutarate aminotransferas…	P37833|AATC_ORYSJ|-153.0|Aspartate aminotransferase, cytoplasmic OS=Oryza sativa subsp. japonica GN=Os01g0760600 PE=2 SV=1	29760.VIT_11s0016g03720.t01|-153.1|COG1448|E|aminotransferase	PF00155.20|Aminotran_1_2|5.1e-80|Aminotransferase class I and II
c1400/f1p174/4322	XP_010941090.1|0x1.da24bff009a02p-627|PREDICTED: dihydrolipoyllysine-residue acetyltransferase component 2 of pyruvate dehydrogenase complex, mitochondrial-like [Elaeis guineensis]_x0001_XP_010941091.1 PREDICTED: dihydrolipoyllysine-residue acetyltransferase component 2 of pyruvate dehydrogenase complex, mitochondrial-like [Elaeis guineensis]_x0001_XP_019710867.1 PREDICTED: dihydrolipoyllysine-re…	egu:105059487|-189.3|K00627|DLAT, aceF, pdhC; pyruvate dehydrogenase E2 component (dihydrolipoamide acetyltransferase) [EC:2.3.1.12]|ko00020|Citrate cycle (TCA cycle);;ko01200|Carbon metabolism;;ko00620|Pyruvate metabolism;;ko00010|Glycolysis / Gluconeogenesis;;	biological_process:glycolytic process(GO:0006096);;molecular_function:transferase activity(GO:0016740);;molecular_function:transferase activity, transferring acyl groups(GO:0016746);;molecular_function:dihydrolipoyllysine-residue acetyltransferase activity(GO:0004742);;cellular_component:mitochondrion(GO:0005739);;cellular_component:mitochondrial matrix(GO:0005759)	Q8RWN9|ODP22_ARATH|-178.9|Dihydrolipoyllysine-residue acetyltransferase component 2 of pyruvate dehydrogenase complex, mitochondrial OS=Arabidopsis thaliana GN=At3g13930 PE=1 SV=2	3847.GLYMA16G00590.1|-185.3|COG0508|C|Dehydrogenase	PF00198.22|2-oxoacid_dh|7.9e-79|2-oxoacid dehydrogenases acyltransferase (catalytic domain)
c30066/f1p31/2333	XP_008801945.1|0x1.752723ac3e0a8p-544|PREDICTED: pescadillo homolog [Phoenix dactylifera]	-	biological_process:rRNA processing(GO:0006364);;biological_process:ribosome biogenesis(GO:0042254);;cellular_component:nucleus(GO:0005634);;cellular_component:nucleoplasm(GO:0005654);;cellular_component:nucleolus(GO:0005730)	Q851S7|PESC_ORYSJ|-150.2|Pescadillo homolog OS=Oryza sativa subsp. japonica GN=PES PE=2 SV=1	29760.VIT_14s0066g00640.t01|-149.7|COG5163|J|Component of the NOP7 complex, which is required for maturation of the 25S and 5.8S ribosomal RNAs and formation of the 60S ribosome (By similarity)	PF06732.10|Pescadillo_N|4.2e-44|Pescadillo N-terminus
c2307/f1p34/5977	XP_020268250.1|0x1.81f5a59730e1bp-526|squamosa promoter-binding-like protein 15 isoform X1 [Asparagus officinalis]	-	cellular_component:cytoplasm(GO:0005737);;cellular_component:cytoplasm(GO:0005737);;biological_process:transcription, DNA-templated(GO:0006351);;biological_process:regulation of transcription, DNA-templated(GO:0006355);;molecular_function:metal ion binding(GO:0046872);;molecular_function:DNA binding(GO:0003677);;cellular_component:nucleus(GO:0005634);;cellular_component:nucleus(GO:0005634)	Q8RY95|SPL14_ARATH|-79.7|Squamosa promoter-binding-like protein 14 OS=Arabidopsis thaliana GN=SPL14 PE=1 SV=3	4641.GSMUA_Achr5P22250_001|-122.0|ENOG4110DQF|S|Squamosa promoter-binding-like protein	-
c59044/f4p23/1524	XP_008799134.1|0x1.3c44ba6b007ebp-700|PREDICTED: probable serine incorporator [Phoenix dactylifera]	-	-	-	4558.Sb01g016840.1|-189.2|ENOG410XP7K|S|serine incorporator	PF03348.14|Serinc|2.8e-117|Serine incorporator (Serinc)
c16183/f1p6/2322	XP_020253032.1|0x1.0190a17034cc7p-346|imidazoleglycerol-phosphate dehydratase-like [Asparagus officinalis]_x0001_ONK77374.1 uncharacterized protein A4U43_C02F5860 [Asparagus officinalis]	egu:105047790|-97.1|K01693|hisB; imidazoleglycerol-phosphate dehydratase [EC:4.2.1.19]|ko01230|Biosynthesis of amino acids;;ko00340|Histidine metabolism;;	biological_process:cellular amino acid biosynthetic process(GO:0008652);;molecular_function:lyase activity(GO:0016829);;biological_process:histidine biosynthetic process(GO:0000105);;biological_process:histidine biosynthetic process(GO:0000105);;molecular_function:imidazoleglycerol-phosphate dehydratase activity(GO:0004424)	Q43072|HIS7_PEA|-91.9|Imidazoleglycerol-phosphate dehydratase OS=Pisum sativum GN=HIS3 PE=2 SV=1	4538.ORGLA04G0225100.1|-95.6|COG0131|E|imidazoleglycerolphosphate dehydratase	PF00475.17|IGPD|2.2e-65|Imidazoleglycerol-phosphate dehydratase
c916/f2p60/2199	OVA20840.1|0x1.9fd3229beae53p-411|UDP-glucuronosyl/UDP-glucosyltransferase [Macleaya cordata]	-	biological_process:sterol biosynthetic process(GO:0016126);;molecular_function:transferase activity(GO:0016740);;molecular_function:transferase activity, transferring glycosyl groups(GO:0016757);;molecular_function:sterol 3-beta-glucosyltransferase activity(GO:0016906);;molecular_function:soladodine glucosyltransferase activity(GO:0102202);;molecular_function:brassicasterol glucosyltransferase ac…	Q9M8Z7|U80A2_ARATH|-116.2|Sterol 3-beta-glucosyltransferase UGT80A2 OS=Arabidopsis thaliana GN=UGT80A2 PE=1 SV=1	29760.VIT_07s0005g05600.t01|-124.1|COG1819|S|Transferase	PF03033.19|Glyco_transf_28|1.9e-34|Glycosyltransferase family 28 N-terminal domain
c87890/f1p29/1525	XP_020258559.1|0x1.0cef72753011cp-662|LOW QUALITY PROTEIN: uncharacterized protein LOC109834963 [Asparagus officinalis]	-	-	-	39947.LOC_Os07g38590.1|-190.1|ENOG410Z0AY|S|carboxyl-terminal peptidase	PF03080.14|Neprosin|4.3e-88|Neprosin
c67956/f3p58/1665	XP_020274754.1|0x1.78600dd677f2ap-614|NADH dehydrogenase [ubiquinone] 1 alpha subcomplex subunit 9, mitochondrial [Asparagus officinalis]_x0001_ONK63813.1 uncharacterized protein A4U43_C07F19210 [Asparagus officinalis]	egu:105059141|-184.2|K03953|NDUFA9; NADH dehydrogenase (ubiquinone) 1 alpha subcomplex subunit 9|ko00190|Oxidative phosphorylation;;	cellular_component:respiratory chain(GO:0070469);;cellular_component:mitochondrion(GO:0005739);;cellular_component:mitochondrial matrix(GO:0005759);;biological_process:oxidation-reduction process(GO:0055114)	Q9SK66|NDUA9_ARATH|-166.5|NADH dehydrogenase [ubiquinone] 1 alpha subcomplex subunit 9, mitochondrial OS=Arabidopsis thaliana GN=At2g20360 PE=1 SV=2	4641.GSMUA_Achr4P04460_001|-183.0|COG0702|GM|epimerase dehydratase	-
c196337/f1p20/1368	ONK74222.1|0x1.3e3baef392896p-203|uncharacterized protein A4U43_C03F4050 [Asparagus officinalis]	-	biological_process:proteolysis(GO:0006508);;molecular_function:peptidase activity(GO:0008233);;molecular_function:hydrolase activity(GO:0016787);;molecular_function:carboxypeptidase activity(GO:0004180);;cellular_component:extracellular region(GO:0005576);;cellular_component:extracellular region(GO:0005576)	Q8S8K6|SCP28_ARATH|-50.1|Serine carboxypeptidase-like 28 OS=Arabidopsis thaliana GN=SCPL28 PE=2 SV=2	29760.VIT_03s0063g00870.t01|-60.4|COG2939|E|carboxy-peptidase	PF00450.21|Peptidase_S10|7.3e-59|Serine carboxypeptidase
c34770/f1p119/2226	XP_009590071.1|0x1.c0284f5241368p-454|PREDICTED: V-type proton ATPase subunit B 2 isoform X1 [Nicotiana tomentosiformis]_x0001_XP_009797523.1 PREDICTED: V-type proton ATPase subunit B 2 [Nicotiana sylvestris]_x0001_XP_016465776.1 PREDICTED: V-type proton ATPase subunit B 2 isoform X2 [Nicotiana tabacum]_x0001_XP_018623293.1 PREDICTED: V-type proton ATPase subunit B 2 isoform X1 [Nicotiana tomento…	pop:POPTR_0009s14000g|-136.2|K02147|ATPeV1B, ATP6B; V-type H+-transporting ATPase subunit B|ko04145|Phagosome;;ko00190|Oxidative phosphorylation;;	biological_process:proton transport(GO:0015992);;cellular_component:membrane(GO:0016020);;molecular_function:hydrolase activity(GO:0016787);;cellular_component:vacuole(GO:0005773);;cellular_component:vacuolar membrane(GO:0005774);;biological_process:ion transport(GO:0006811)	Q9SZN1|VATB2_ARATH|-136.2|V-type proton ATPase subunit B2 OS=Arabidopsis thaliana GN=VHA-B2 PE=1 SV=1	3694.POPTR_0009s14000.1|-137.5|COG1156|C|Produces ATP from ADP in the presence of a proton gradient across the membrane. The V-type beta chain is a regulatory subunit (By similarity)	-
c33700/f1p124/2512	XP_008785947.1|0x1.3a90dd6fd948dp-879|PREDICTED: cyclic nucleotide-gated ion channel 2-like [Phoenix dactylifera]	pda:103704450|-265.4|K05391|CNGF; cyclic nucleotide gated channel, other eukaryote|ko04626|Plant-pathogen interaction;;	cellular_component:plasma membrane(GO:0005886);;biological_process:ion transport(GO:0006811);;biological_process:defense response(GO:0006952);;cellular_component:membrane(GO:0016020);;cellular_component:integral component of membrane(GO:0016021);;molecular_function:cAMP binding(GO:0030552);;molecular_function:cGMP binding(GO:0030553);;molecular_function:nucleotide binding(GO:0000166);;molecular_f…	O65718|CNGC2_ARATH|-105.7|Cyclic nucleotide-gated ion channel 2 OS=Arabidopsis thaliana GN=CNGC2 PE=1 SV=1	4641.GSMUA_Achr9P09420_001|-214.8|ENOG410XPSE|U|Potassium voltage-gated channel, subfamily H (Eag-related), member	-
c19379/f2p9/1329	XP_019705253.1|0x1.8defeefaa9e28p-270|PREDICTED: mediator of RNA polymerase II transcription subunit 31 [Elaeis guineensis]_x0001_XP_019705254.1 PREDICTED: mediator of RNA polymerase II transcription subunit 31 [Elaeis guineensis]_x0001_XP_019705255.1 PREDICTED: mediator of RNA polymerase II transcription subunit 31 [Elaeis guineensis]_x0001_XP_019705256.1 PREDICTED: mediator of RNA polymerase II…	-	biological_process:regulation of transcription, DNA-templated(GO:0006355);;cellular_component:mediator complex(GO:0016592);;cellular_component:nucleus(GO:0005634);;cellular_component:nucleus(GO:0005634);;biological_process:transcription, DNA-templated(GO:0006351)	Q8VYB1|MED31_ARATH|-68.4|Mediator of RNA polymerase II transcription subunit 31 OS=Arabidopsis thaliana GN=MED31 PE=1 SV=1	4641.GSMUA_Achr2P10410_001|-78.2|COG5088|K|Component of the Mediator complex, a coactivator involved in the regulated transcription of nearly all RNA polymerase II-dependent genes. Mediator functions as a bridge to convey information from gene-specific regulatory proteins to the basal RNA polymerase II transcription machinery. Mediator is recruited to promoters by direct interactions with regulat…	PF05669.11|Med31|5e-36|SOH1
c16471/f1p10/2322	XP_020696836.1|0x1.d57cdae165baap-435|protein trichome birefringence-like 35 [Dendrobium catenatum]_x0001_PKU78220.1 hypothetical protein MA16_Dca024453 [Dendrobium catenatum]	-	cellular_component:membrane(GO:0016020);;cellular_component:membrane(GO:0016020);;cellular_component:integral component of membrane(GO:0016021)	Q8RXQ1|TBL35_ARATH|-117.7|Protein trichome birefringence-like 35 OS=Arabidopsis thaliana GN=TBL35 PE=2 SV=1	4641.GSMUA_Achr3P10020_001|-126.5|ENOG410YG4N|S|Pfam:DUF231	PF13839.5|PC-Esterase|2.4e-82|GDSL/SGNH-like Acyl-Esterase family found in Pmr5 and Cas1p
c23588/f1p15/1856	XP_022976329.1|0x1.ba5d3e789c234p-218|uncharacterized protein LOC111476762 [Cucurbita maxima]	-	-	-	4555.Si029731m|-64.9|ENOG410YCGU|S|Protein of unknown function (DUF1005)	PF06219.11|DUF1005|3.7e-81|Protein of unknown function (DUF1005)
c118656/f1p145/1719	XP_012480539.1|0x1.fc3808b085b79p-704|PREDICTED: actin-100 [Gossypium raimondii]_x0001_XP_016728229.1 PREDICTED: actin-100 [Gossypium hirsutum]_x0001_XP_016691318.1 PREDICTED: actin-100 [Gossypium hirsutum]_x0001_XP_017633426.1 PREDICTED: actin-100 [Gossypium arboreum]_x0001_KHF97889.1 hypothetical protein F383_16333 [Gossypium arboreum]_x0001_KJB32745.1 hypothetical protein B456_005G259200 [Goss…	-	cellular_component:cytoskeleton(GO:0005856);;cellular_component:cytoskeleton(GO:0005856);;molecular_function:nucleotide binding(GO:0000166);;molecular_function:ATP binding(GO:0005524);;cellular_component:cytoplasm(GO:0005737)	P53492|ACT7_ARATH|-212.6|Actin-7 OS=Arabidopsis thaliana GN=ACT7 PE=1 SV=1	4081.Solyc11g005330.1.1|-212.8|COG5277|Z|Actin-related protein	PF00022.18|Actin|3.4e-148|Actin
c150903/f1p132/1906	Q41233.1|0x1.10cca5c06c358p-264|RecName: Full=Alliin lyase 2; Short=Alliinase-2; AltName: Full=Cysteine sulphoxide lyase 2; Flags: Precursor_x0001_AAB32477.1 alliinase [Allium sativum]	-	molecular_function:alliin lyase activity(GO:0047654);;cellular_component:vacuole(GO:0005773);;cellular_component:vacuole(GO:0005773);;molecular_function:lyase activity(GO:0016829)	Q41233|ALLN2_ALLSA|-82.7|Alliin lyase 2 OS=Allium sativum PE=1 SV=1	29760.VIT_18s0157g00140.t01|-40.6|ENOG410XS9Z|S|tryptophan aminotransferase-related protein 4-like	PF04864.12|Alliinase_C|3.5e-30|Allinase
c28228/f3p29/1218	XP_020261856.1|0x1.359e971eb963cp-472|GDSL esterase/lipase At5g55050-like [Asparagus officinalis]_x0001_ONK72966.1 uncharacterized protein A4U43_C04F25530 [Asparagus officinalis]	-	-	-	4641.GSMUA_Achr4P25850_001|-135.1|ENOG410YED5|S|GDSL-like Lipase/Acylhydrolase	-
c18744/f1p18/2313	ONK62978.1|0x1.d2a785ef0baf6p-212|uncharacterized protein A4U43_C07F10130 [Asparagus officinalis]	-	-	-	4641.GSMUA_Achr11P15710_001|-61.7|COG1331|O|mannose-6-phosphate isomerase activity	-
c27539/f1p10/3023	XP_020263574.1|0x1.a28c7a0afa83ep-325|LOW QUALITY PROTEIN: DDB1- and CUL4-associated factor homolog 1 [Asparagus officinalis]	-	cellular_component:nucleus(GO:0005634);;cellular_component:nucleus(GO:0005634);;biological_process:protein ubiquitination(GO:0016567)	Q9M086|DCAF1_ARATH|-65.8|DDB1- and CUL4-associated factor homolog 1 OS=Arabidopsis thaliana GN=DCAF1 PE=1 SV=2	4641.GSMUA_Achr7P23160_001|-76.7|ENOG410XR8C|S|Vpr (HIV-1) binding protein	-
c79768/f2p20/1102	XP_020276778.1|0x1.05e24570c3875p-158|uncharacterized protein LOC109851083 [Asparagus officinalis]_x0001_ONK63751.1 uncharacterized protein A4U43_C07F18560 [Asparagus officinalis]	-	-	-	4555.Si005834m|-44.8|ENOG410Y9P5|S|acyl-CoA N-acyltransferase with RING FYVE PHD-type zinc finger domain-containing protein	-
c16776/f1p479/2726	XP_010912891.1|0x1.68cc59020780dp-611|PREDICTED: 26S proteasome non-ATPase regulatory subunit 6 [Elaeis guineensis]	egu:105038726|-184.6|K03037|PSMD6, RPN7; 26S proteasome regulatory subunit N7|ko03050|Proteasome;;	cellular_component:proteasome complex(GO:0000502)	Q8W425|PSMD6_ORYSJ|-182.9|26S proteasome non-ATPase regulatory subunit 6 OS=Oryza sativa subsp. japonica GN=RPN7 PE=2 SV=1	4533.OB04G23880.1|-182.5|COG5187|O|Proteasome (Prosome, macropain) 26S subunit, non-ATPase, 6	PF10602.8|RPN7|1.3e-57|26S proteasome subunit RPN7
c30061/f1p3/2224	XP_018441588.1|0x1.751b530d190c8p-381|PREDICTED: F-box protein MAX2-like [Raphanus sativus]	-	biological_process:multicellular organism development(GO:0007275);;biological_process:auxin-activated signaling pathway(GO:0009734);;biological_process:protein ubiquitination(GO:0016567);;molecular_function:protein binding(GO:0005515);;cellular_component:nucleus(GO:0005634);;cellular_component:nucleus(GO:0005634)	Q9SIM9|MAX2_ARATH|-81.3|F-box protein MAX2 OS=Arabidopsis thaliana GN=MAX2 PE=1 SV=2	4641.GSMUA_Achr11P10210_001|-90.8|ENOG4110R60|S|regulation of meristem structural organization	-
c154940/f1p1/1354	XP_020265132.1|0x1.bda211b5c6ea8p-260|trans-resveratrol di-O-methyltransferase-like [Asparagus officinalis]	-	-	-	29760.VIT_12s0028g02830.t01|-51.3|ENOG410XS7T|S|o-methyltransferase	PF00891.17|Methyltransf_2|1.2e-53|O-methyltransferase
c39136/f1p86/2069	XP_010925261.1|0x1.e4c625a305bb8p-711|PREDICTED: 26S protease regulatory subunit 8 homolog A [Elaeis guineensis]	egu:105047851|-214.6|K03066|PSMC5, RPT6; 26S proteasome regulatory subunit T6|ko03050|Proteasome;;	cellular_component:nucleus(GO:0005634);;cellular_component:nucleus(GO:0005634);;cellular_component:cytoplasm(GO:0005737);;cellular_component:cytoplasm(GO:0005737);;molecular_function:nucleotide binding(GO:0000166);;cellular_component:proteasome complex(GO:0000502);;molecular_function:ATP binding(GO:0005524)	Q9C5U3|PRS8A_ARATH|-211.8|26S proteasome regulatory subunit 8 homolog A OS=Arabidopsis thaliana GN=RPT6A PE=1 SV=1	4577.GRMZM2G137528_P01|-215.3|COG1222|O|26S protease regulatory subunit	PF00004.28|AAA|7.9e-43|ATPase family associated with various cellular activities (AAA)
c30807/f1p10/3797	XP_020265593.1|0x1.21c5b377ee4e2p-203|CCR4-NOT transcription complex subunit 10-like [Asparagus officinalis]_x0001_ONK70336.1 uncharacterized protein A4U43_C05F32680 [Asparagus officinalis]	pxb:103932727|-37.8|K12607|CNOT10; CCR4-NOT transcription complex subunit 10|ko03018|RNA degradation;;	-	-	3847.GLYMA17G11950.2|-30.5|ENOG410XQQJ|K|Ccr4-NOT transcription complex, subunit	-
c1972/f1p27/2866	AKI87756.1|0x1.d0dafe60b99b4p-217|alliinase, partial [Allium sativum]	-	molecular_function:alliin lyase activity(GO:0047654);;cellular_component:vacuole(GO:0005773);;cellular_component:vacuole(GO:0005773);;molecular_function:lyase activity(GO:0016829)	Q41233|ALLN2_ALLSA|-67.8|Alliin lyase 2 OS=Allium sativum PE=1 SV=1	29760.VIT_18s0157g00140.t01|-31.0|ENOG410XS9Z|S|tryptophan aminotransferase-related protein 4-like	-
c151378/f1p6/1822	XP_020277272.1|0x1.c2ea8d8476a2cp-669|LON peptidase N-terminal domain and RING finger protein 1 isoform X1 [Asparagus officinalis]_x0001_XP_020277273.1 LON peptidase N-terminal domain and RING finger protein 1 isoform X1 [Asparagus officinalis]_x0001_XP_020277274.1 LON peptidase N-terminal domain and RING finger protein 1 isoform X1 [Asparagus officinalis]_x0001_XP_020277276.1 LON peptidase N-ter…	-	-	-	4555.Si034530m|-181.8|COG2802|O|Peptidase S16, lon domain protein	-
c24287/f1p77/3384	XP_020249811.1|0x1.c5bf40d872066p-668|transcriptional corepressor LEUNIG isoform X1 [Asparagus officinalis]	-	molecular_function:protein binding(GO:0005515);;molecular_function:protein binding(GO:0005515);;cellular_component:nucleus(GO:0005634);;cellular_component:nucleus(GO:0005634);;biological_process:transcription, DNA-templated(GO:0006351);;biological_process:regulation of transcription, DNA-templated(GO:0006355);;biological_process:cellular response to DNA damage stimulus(GO:0006974);;biological_pro…	Q9FUY2|LEUNG_ARATH|-112.8|Transcriptional corepressor LEUNIG OS=Arabidopsis thaliana GN=LUG PE=1 SV=2	3694.POPTR_0006s26420.1|-169.1|ENOG410ZXVU|K|transcriptional co-repressor	-
c229650/f1p16/1553	XP_010935694.1|0x1.50d9971e39599p-164|PREDICTED: early light-induced protein 1, chloroplastic isoform X1 [Elaeis guineensis]	-	biological_process:cellular response to high light intensity(GO:0071486);;cellular_component:chloroplast thylakoid membrane(GO:0009535);;biological_process:cellular response to far red light(GO:0071490);;cellular_component:chloroplast thylakoid membrane(GO:0009535);;biological_process:cellular response to red light(GO:0071491);;cellular_component:plastid(GO:0009536);;cellular_component:thylakoid(…	P93735|ELIP1_ARATH|-42.3|Early light-induced protein 1, chloroplastic OS=Arabidopsis thaliana GN=ELIP1 PE=1 SV=1	4641.GSMUA_Achr8P20530_001|-43.8|ENOG410Y0RG|S|early light-induced protein	-
c2865/f1p10/1686	XP_020272273.1|0x1.7a4b80ba22745p-548|spermine synthase-like isoform X1 [Asparagus officinalis]_x0001_ONK79145.1 uncharacterized protein A4U43_C01F3390 [Asparagus officinalis]	sita:101771514|-151.5|K00797|speE, SRM; spermidine synthase [EC:2.5.1.16]|ko00330|Arginine and proline metabolism;;ko00410|beta-Alanine metabolism;;ko00480|Glutathione metabolism;;ko00270|Cysteine and methionine metabolism;;	molecular_function:spermine synthase activity(GO:0016768);;biological_process:polyamine biosynthetic process(GO:0006596);;biological_process:spermine biosynthetic process(GO:0006597);;molecular_function:transferase activity(GO:0016740)	Q94BN2|SPSY_ARATH|-144.8|Spermine synthase OS=Arabidopsis thaliana GN=SPMS PE=1 SV=1	4555.Si020398m|-152.8|COG0421|E|Catalyzes the production of spermidine from putrescine and decarboxylated S-adenosylmethionine (dcSAM), which serves as an aminopropyl donor (By similarity)	PF01564.16|Spermine_synth|2e-65|Spermine/spermidine synthase domain
c26771/f1p81/1894	ONK63119.1|0x1.2d2e51a73b4b6p-364|uncharacterized protein A4U43_C07F11610 [Asparagus officinalis]	-	molecular_function:kinase activity(GO:0016301);;biological_process:phosphorylation(GO:0016310);;molecular_function:transferase activity(GO:0016740);;molecular_function:nucleotide binding(GO:0000166);;molecular_function:protein serine/threonine kinase activity(GO:0004674);;molecular_function:ATP binding(GO:0005524)	P51139|MSK3_MEDSA|-108.8|Glycogen synthase kinase-3 homolog MsK-3 OS=Medicago sativa GN=MSK-3 PE=2 SV=2	15368.BRADI2G08890.1|-111.0|COG0515|T|Serine Threonine protein kinase	PF00069.24|Pkinase|3.2e-46|Protein kinase domain
c89288/f1p51/1223	XP_010243791.1|0x1.134c42a26b9efp-202|PREDICTED: guanine nucleotide-binding protein subunit beta-like protein [Nelumbo nucifera]	-	cellular_component:ribosome(GO:0005840);;cellular_component:intracellular ribonucleoprotein complex(GO:0030529)	Q39836|GBLP_SOYBN|-58.2|Guanine nucleotide-binding protein subunit beta-like protein OS=Glycine max PE=2 SV=1	29760.VIT_17s0000g02750.t01|-59.8|ENOG410XQGZ|S|guanine nucleotidebinding protein	-
c2373/f1p34/2489	XP_020269366.1|0x1.1b69dfd733895p-490|U-box domain-containing protein 10-like [Asparagus officinalis]_x0001_ONK66185.1 uncharacterized protein A4U43_C06F5000 [Asparagus officinalis]	-	biological_process:protein ubiquitination(GO:0016567);;molecular_function:transferase activity(GO:0016740)	Q9C9A6|PUB10_ARATH|-120.3|U-box domain-containing protein 10 OS=Arabidopsis thaliana GN=PUB10 PE=2 SV=1	4538.ORGLA02G0268600.1|-134.0|ENOG410YBA5|O|Ubox domain-containing protein	-
c302091/f17p136/1736	XP_020273993.1|0x1.929ca49cf5846p-587|tubulin alpha-3 chain-like [Asparagus officinalis]_x0001_ONK65478.1 uncharacterized protein A4U43_C07F37520 [Asparagus officinalis]	mus:103984973|-177.1|K07374|TUBA; tubulin alpha|ko04145|Phagosome;;	cellular_component:cytoskeleton(GO:0005856);;cellular_component:cytoskeleton(GO:0005856);;cellular_component:microtubule(GO:0005874);;molecular_function:nucleotide binding(GO:0000166);;molecular_function:GTP binding(GO:0005525);;cellular_component:cytoplasm(GO:0005737)	O22349|TBA3_ELEIN|-179.2|Tubulin alpha-3 chain OS=Eleusine indica GN=TUBA3 PE=2 SV=1	4538.ORGLA07G0252800.1|-177.9|COG5023|Z|protein polymerization	PF03953.16|Tubulin_C|8.3e-51|Tubulin C-terminal domain
c53590/f2p3/949	PIN27033.1|0x1.9f89a1309f813p-231|Peptide methionine sulfoxide reductase [Handroanthus impetiginosus]	-	molecular_function:peptide-methionine (S)-S-oxide reductase activity(GO:0008113);;molecular_function:oxidoreductase activity(GO:0016491);;biological_process:oxidation-reduction process(GO:0055114)	P54153|MSRA_SOLLC|-68.3|Peptide methionine sulfoxide reductase (Fragment) OS=Solanum lycopersicum GN=E4 PE=3 SV=1	29760.VIT_17s0000g09780.t01|-68.0|COG0225|O|Has an important function as a repair enzyme for proteins that have been inactivated by oxidation. Catalyzes the reversible oxidation-reduction of methionine sulfoxide in proteins to methionine (By similarity)	PF01625.20|PMSR|4.7e-57|Peptide methionine sulfoxide reductase
c5879/f1p161/2560	XP_020274010.1|0x1.9a0bf02708be3p-469|serine/threonine-protein kinase AtPK2/AtPK19-like [Asparagus officinalis]_x0001_ONK62669.1 uncharacterized protein A4U43_C07F6740 [Asparagus officinalis]	-	molecular_function:ATP binding(GO:0005524);;molecular_function:kinase activity(GO:0016301);;biological_process:phosphorylation(GO:0016310);;molecular_function:transferase activity(GO:0016740);;molecular_function:nucleotide binding(GO:0000166);;molecular_function:protein serine/threonine kinase activity(GO:0004674);;molecular_function:protein binding(GO:0005515)	Q39030|KPK2_ARATH|-131.5|Serine/threonine-protein kinase AtPK2/AtPK19 OS=Arabidopsis thaliana GN=ATPK2 PE=1 SV=2	4558.Sb01g036230.1|-137.7|ENOG410XNPH|T|protein serine/threonine kinase activity	PF00069.24|Pkinase|9.6e-64|Protein kinase domain
c5842/f1p43/2294	AKR15675.1|0x1.7112f63bb1022p-378|coat protein [Garlic virus X]_x0001_AKR15677.1 coat protein [Garlic virus X]_x0001_AKR15678.1 coat protein [Garlic virus X]_x0001_AKR15679.1 coat protein [Garlic virus X]_x0001_AKR15680.1 coat protein [Garlic virus X]_x0001_AKR15682.1 coat protein [Garlic virus X]_x0001_ASY93298.1 coat protein [Garlic virus X]_x0001_ASY93300.1 coat protein [Garlic virus X]_x0001_…	-	-	-	-	PF00286.19|Flexi_CP|1e-45|Viral coat protein
c26634/f1p20/1205	XP_008787861.1|0x1.0b88c483abb28p-187|PREDICTED: nuclear transcription factor Y subunit A-6-like [Phoenix dactylifera]	-	biological_process:transcription, DNA-templated(GO:0006351);;biological_process:regulation of transcription, DNA-templated(GO:0006355);;molecular_function:DNA binding(GO:0003677);;cellular_component:nucleus(GO:0005634);;cellular_component:nucleus(GO:0005634)	Q9LVJ7|NFYA6_ARATH|-29.0|Nuclear transcription factor Y subunit A-6 OS=Arabidopsis thaliana GN=NFYA6 PE=1 SV=1	4641.GSMUA_Achr2P21730_001|-50.1|COG5224|K|Nuclear transcription factor Y	-
c12930/f1p102/2013	XP_020247459.1|0x1.882a719f87fb2p-838|hsp70-Hsp90 organizing protein 2-like [Asparagus officinalis]_x0001_ONK55966.1 uncharacterized protein A4U43_C10F2770 [Asparagus officinalis]	-	cellular_component:cytoplasm(GO:0005737);;biological_process:chaperone-mediated protein complex assembly(GO:0051131);;molecular_function:Hsp90 protein binding(GO:0051879);;molecular_function:preprotein binding(GO:0070678);;cellular_component:nucleus(GO:0005634);;cellular_component:nucleus(GO:0005634);;cellular_component:cytoplasm(GO:0005737)	F8RP11|HSOP_WHEAT|-229.3|Hsp70-Hsp90 organizing protein OS=Triticum aestivum GN=HOP PE=1 SV=1	3694.POPTR_0003s11290.1|-234.5|ENOG410XTCJ|S|tetratricopeptide repeat domain	-
c269620/f1p11/1921	XP_020247808.1|0x1.d9929a195cecp-130|serine/threonine-protein kinase tricorner-like [Asparagus officinalis]_x0001_XP_020247809.1 serine/threonine-protein kinase tricorner-like [Asparagus officinalis]_x0001_ONK57371.1 uncharacterized protein A4U43_C10F19400 [Asparagus officinalis]	-	-	-	3694.POPTR_0005s24840.1|-37.4|ENOG410XQC0|T|serine threonine-protein kinase	-
c23775/f1p17/2771	XP_020241290.1|0x1.049482955f8f8p-569|protein TIC 56, chloroplastic [Asparagus officinalis]_x0001_XP_020241291.1 protein TIC 56, chloroplastic [Asparagus officinalis]_x0001_XP_020241292.1 protein TIC 56, chloroplastic [Asparagus officinalis]_x0001_ONK61825.1 uncharacterized protein A4U43_C08F33980 [Asparagus officinalis]	-	cellular_component:chloroplast(GO:0009507);;cellular_component:plastid inner membrane(GO:0009528);;cellular_component:plastid(GO:0009536);;cellular_component:chloroplast inner membrane(GO:0009706);;biological_process:protein transport(GO:0015031);;cellular_component:membrane(GO:0016020);;molecular_function:protein binding(GO:0005515);;molecular_function:protein binding(GO:0005515);;molecular_func…	Q7Y1W1|TIC56_ARATH|-142.1|Protein TIC 56, chloroplastic OS=Arabidopsis thaliana GN=TIC56 PE=1 SV=1	4641.GSMUA_Achr11P08380_001|-157.5|ENOG4111F7B|S|NA	-
c272161/f1p11/1534	XP_020086425.1|0x1.6126982d36b7dp-217|uncharacterized protein LOC109708907 [Ananas comosus]	-	-	-	15368.BRADI1G42880.1|-65.3|COG0596|S|Alpha beta hydrolase	-
c5321/f1p5/1254	XP_020257661.1|0x1.e77ee408cccfcp-330|origin of replication complex subunit 1 [Asparagus officinalis]_x0001_XP_020257662.1 origin of replication complex subunit 1 [Asparagus officinalis]_x0001_ONK75842.1 uncharacterized protein A4U43_C03F21130 [Asparagus officinalis]	-	cellular_component:nucleus(GO:0005634);;biological_process:DNA replication(GO:0006260);;molecular_function:nucleotide binding(GO:0000166);;molecular_function:ATP binding(GO:0005524);;cellular_component:nucleus(GO:0005634)	B8AK78|ORC5_ORYSI|-56.3|Origin of replication complex subunit 5 OS=Oryza sativa subsp. indica GN=OsI_13614 PE=3 SV=1	4641.GSMUA_Achr9P09490_001|-90.1|ENOG410XSY0|L|origin recognition complex subunit	PF14630.5|ORC5_C|1e-54|Origin recognition complex (ORC) subunit 5 C-terminus
c58392/f1p7/2061	XP_020262283.1|0x1.dcbdcccbd195ap-341|protein ecdysoneless homolog [Asparagus officinalis]	-	-	Q9LSM5|ECD_ARATH|-74.5|Protein ecdysoneless homolog OS=Arabidopsis thaliana GN=At5g65490 PE=1 SV=1	4641.GSMUA_Achr9P13580_001|-80.2|ENOG410XR07|S|ecdysoneless homolog (Drosophila)	PF07093.10|SGT1|6.8e-40|SGT1 protein
c2980/f1p406/3675	XP_020265168.1|0x1.11ccdc144a4c7p-755|vacuolar-processing enzyme-like [Asparagus officinalis]_x0001_ONK69978.1 uncharacterized protein A4U43_C05F28930 [Asparagus officinalis]	-	molecular_function:hydrolase activity(GO:0016787);;biological_process:proteolysis(GO:0006508);;molecular_function:peptidase activity(GO:0008233);;molecular_function:cysteine-type peptidase activity(GO:0008234)	P49043|VPE_CITSI|-200.3|Vacuolar-processing enzyme OS=Citrus sinensis PE=2 SV=1	4641.GSMUA_Achr6P35740_001|-214.7|COG5206|O|phosphatidylinositol glycan anchor biosynthesis, class K	PF01650.17|Peptidase_C13|5.3e-110|Peptidase C13 family
c31785/f1p55/2299	XP_020255756.1|0x1.39e868dc7c986p-401|uncharacterized protein LOC109832759 isoform X1 [Asparagus officinalis]	-	-	-	4641.GSMUA_Achr10P24620_001|-115.0|COG2070|S|2-Nitropropane dioxygenase	PF03060.14|NMO|4.3e-47|Nitronate monooxygenase
c64097/f1p353/1429	AFV61770.1|0x1.c52a66b90240fp-318|40 kDa protein [Garlic virus X]	-	-	-	-	PF05549.10|Allexi_40kDa|7.2e-52|Allexivirus 40kDa protein
c5507/f1p343/2218	XP_020257425.1|0x1.93d47b89357a7p-228|LOW QUALITY PROTEIN: calmodulin-binding transcription activator 3-like [Asparagus officinalis]	-	molecular_function:calmodulin binding(GO:0005516);;molecular_function:calmodulin binding(GO:0005516);;cellular_component:nucleus(GO:0005634);;cellular_component:nucleus(GO:0005634);;cellular_component:nucleus(GO:0005634);;biological_process:transcription, DNA-templated(GO:0006351);;biological_process:regulation of transcription, DNA-templated(GO:0006355);;biological_process:defense response(GO:00…	Q8GSA7|CMTA3_ARATH|-52.3|Calmodulin-binding transcription activator 3 OS=Arabidopsis thaliana GN=CAMTA3 PE=1 SV=1	4555.Si034046m|-63.4|ENOG4112848|S|calmodulin-binding transcription activator	-
c9682/f1p406/2196	AFV61767.1|0x1.3060c65ff2d0ep-718|replicase [Garlic virus X]	-	-	-	-	PF01660.16|Vmethyltransf|6.4e-39|Viral methyltransferase
c39093/f1p13/1815	KDO81999.1|0x1.ec566f4651ec4p-310|hypothetical protein CISIN_1g0050561mg, partial [Citrus sinensis]	-	-	-	436017.A4RXP6|-64.1|COG0654|CH|oxidoreductase activity, acting on paired donors, with incorporation or reduction of molecular oxygen, NAD(P)H as one donor, and incorporation of one atom of oxygen	PF01494.18|FAD_binding_3|6e-43|FAD binding domain
[truncated: 29,407 more rows]
